# Supplementary material for: Two Achilles' Heels of the Ebolavirus Glycoprotein?
Source: Preprints.org preprint supplement (doi:10.20944/preprints202003.0183.v1), 2020-03-11
Supplement: Supplementary file 1 [file supplementary]

# Two Achilles' Heels of the Ebolavirus Glycoprotein? Supplementary Materials

Wei Li\*

March 10, 2020

---

\*Institute of Special Environment Medicine, Nantong University, No. 9, Seyuan Road, Nantong City, Jiangsu Province, P. R. China

# List of Tables

|    |                                                               |    |
|----|---------------------------------------------------------------|----|
| 1  | Salt bridging network analysis . . . . .                      | 40 |
| 2  | Counting of salt bridges . . . . .                            | 45 |
| 3  | Side chain and main chain hydrogen bonding analysis . . . . . | 49 |
| 4  | Side chain hydrogen bonding analysis . . . . .                | 50 |
| 5  | Interfacial salt bridging network analysis . . . . .          | 59 |
| 6  | Counting of interfacial salt bridges . . . . .                | 60 |
| 7  | 1EBO-specific salt bridging network analysis . . . . .        | 61 |
| 8  | 2EBO-specific salt bridging network analysis . . . . .        | 62 |
| 9  | 2QHR-specific salt bridging network analysis . . . . .        | 63 |
| 10 | 2Y6S-specific salt bridging network analysis . . . . .        | 64 |
| 11 | 3CSY-specific salt bridging network analysis . . . . .        | 67 |
| 12 | 3VE0-specific salt bridging network analysis . . . . .        | 68 |
| 13 | 5F1B-specific salt bridging network analysis . . . . .        | 69 |
| 14 | 5FHC-specific salt bridging network analysis . . . . .        | 71 |
| 15 | 5HJ3-specific salt bridging network analysis . . . . .        | 74 |
| 16 | 5JNX-specific salt bridging network analysis . . . . .        | 76 |
| 17 | 5JQ3-specific salt bridging network analysis . . . . .        | 77 |
| 18 | 5JQ7-specific salt bridging network analysis . . . . .        | 78 |
| 19 | 5JQB-specific salt bridging network analysis . . . . .        | 79 |
| 20 | 5KEL-specific salt bridging network analysis . . . . .        | 83 |
| 21 | 5KEM-specific salt bridging network analysis . . . . .        | 85 |
| 22 | 5KEN-specific salt bridging network analysis . . . . .        | 88 |
| 23 | 5T42-specific salt bridging network analysis . . . . .        | 89 |
| 24 | 6DZL-specific salt bridging network analysis . . . . .        | 90 |
| 25 | 6EA7-specific salt bridging network analysis . . . . .        | 92 |
| 26 | 6F5U-specific salt bridging network analysis . . . . .        | 93 |
| 27 | 6F6I-specific salt bridging network analysis . . . . .        | 94 |
| 28 | 6F6N-specific salt bridging network analysis . . . . .        | 95 |

|    |                                                                    |     |
|----|--------------------------------------------------------------------|-----|
| 29 | 6F6S-specific salt bridging network analysis . . . . .             | 96  |
| 30 | 6G95-specific salt bridging network analysis . . . . .             | 97  |
| 31 | 6G9B-specific salt bridging network analysis . . . . .             | 98  |
| 32 | 6G9I-specific salt bridging network analysis . . . . .             | 99  |
| 33 | 6HRO-specific salt bridging network analysis . . . . .             | 100 |
| 34 | 6HS4-specific salt bridging network analysis . . . . .             | 101 |
| 35 | 6MAM-specific salt bridging network analysis . . . . .             | 104 |
| 36 | 6NAE-specific salt bridging network analysis . . . . .             | 105 |
| 37 | 6QD7-specific salt bridging network analysis . . . . .             | 108 |
| 38 | 6QD8-specific salt bridging network analysis . . . . .             | 110 |
| 39 | 6S8D-specific salt bridging network analysis . . . . .             | 111 |
| 40 | 6S8I-specific salt bridging network analysis . . . . .             | 113 |
| 41 | 6S8J-specific salt bridging network analysis . . . . .             | 115 |
| 42 | 1EBO-specific interfacial salt bridging network analysis . . . . . | 116 |
| 43 | 2EBO-specific interfacial salt bridging network analysis . . . . . | 117 |
| 44 | 2QHR-specific interfacial salt bridging network analysis . . . . . | 118 |
| 45 | 2Y6S-specific interfacial salt bridging network analysis . . . . . | 119 |
| 46 | 3CSY-specific interfacial salt bridging network analysis . . . . . | 120 |
| 47 | 3VE0-specific interfacial salt bridging network analysis . . . . . | 121 |
| 48 | 5F1B-specific interfacial salt bridging network analysis . . . . . | 122 |
| 49 | 5FHC-specific interfacial salt bridging network analysis . . . . . | 123 |
| 50 | 5HJ3-specific interfacial salt bridging network analysis . . . . . | 124 |
| 51 | 5JNX-specific interfacial salt bridging network analysis . . . . . | 125 |
| 52 | 5JQ3-specific interfacial salt bridging network analysis . . . . . | 126 |
| 53 | 5JQ7-specific interfacial salt bridging network analysis . . . . . | 127 |
| 54 | 5JQB-specific interfacial salt bridging network analysis . . . . . | 128 |
| 55 | 5KEL-specific interfacial salt bridging network analysis . . . . . | 129 |
| 56 | 5KEM-specific interfacial salt bridging network analysis . . . . . | 130 |
| 57 | 5KEN-specific interfacial salt bridging network analysis . . . . . | 131 |
| 58 | 6DZL-specific interfacial salt bridging network analysis . . . . . | 132 |

|    |                                                                              |     |
|----|------------------------------------------------------------------------------|-----|
| 59 | 6EA7-specific interfacial salt bridging network analysis . . . . .           | 133 |
| 60 | 6F5U-specific interfacial salt bridging network analysis . . . . .           | 134 |
| 61 | 6F6I-specific interfacial salt bridging network analysis . . . . .           | 135 |
| 62 | 6F6N-specific interfacial salt bridging network analysis . . . . .           | 136 |
| 63 | 6F6S-specific interfacial salt bridging network analysis . . . . .           | 137 |
| 64 | 6G95-specific interfacial salt bridging network analysis . . . . .           | 138 |
| 65 | 6G9B-specific interfacial salt bridging network analysis . . . . .           | 139 |
| 66 | 6G9I-specific interfacial salt bridging network analysis . . . . .           | 140 |
| 67 | 6HRO-specific interfacial salt bridging network analysis . . . . .           | 141 |
| 68 | 6HS4-specific interfacial salt bridging network analysis . . . . .           | 142 |
| 69 | 6MAM-specific interfacial salt bridging network analysis . . . . .           | 143 |
| 70 | 6NAE-specific interfacial salt bridging network analysis . . . . .           | 144 |
| 71 | 6QD7-specific interfacial salt bridging network analysis . . . . .           | 145 |
| 72 | 6QD8-specific interfacial salt bridging network analysis . . . . .           | 146 |
| 73 | 6S8D-specific interfacial salt bridging network analysis . . . . .           | 147 |
| 74 | 6S8I-specific interfacial salt bridging network analysis . . . . .           | 148 |
| 75 | 6S8J-specific interfacial salt bridging network analysis . . . . .           | 149 |
| 76 | 2RLJ-1-specific side chain and main chain hydrogen bonding analysis . . . .  | 150 |
| 77 | 2RLJ-11-specific side chain and main chain hydrogen bonding analysis . . . . | 151 |
| 78 | 2RLJ-12-specific side chain and main chain hydrogen bonding analysis . . . . | 152 |
| 79 | 2RLJ-13-specific side chain and main chain hydrogen bonding analysis . . . . | 153 |
| 80 | 2RLJ-14-specific side chain and main chain hydrogen bonding analysis . . . . | 154 |
| 81 | 2RLJ-15-specific side chain and main chain hydrogen bonding analysis . . . . | 155 |
| 82 | 2RLJ-16-specific side chain and main chain hydrogen bonding analysis . . . . | 156 |
| 83 | 2RLJ-19-specific side chain and main chain hydrogen bonding analysis . . . . | 157 |
| 84 | 2RLJ-2-specific side chain and main chain hydrogen bonding analysis . . . .  | 158 |
| 85 | 2RLJ-3-specific side chain and main chain hydrogen bonding analysis . . . .  | 159 |
| 86 | 2RLJ-4-specific side chain and main chain hydrogen bonding analysis . . . .  | 160 |
| 87 | 2RLJ-5-specific side chain and main chain hydrogen bonding analysis . . . .  | 161 |
| 88 | 2RLJ-6-specific side chain and main chain hydrogen bonding analysis . . . .  | 162 |

|     |                                                                              |     |
|-----|------------------------------------------------------------------------------|-----|
| 89  | 2RLJ-7-specific side chain and main chain hydrogen bonding analysis . . . .  | 163 |
| 90  | 2RLJ-9-specific side chain and main chain hydrogen bonding analysis . . . .  | 164 |
| 91  | 5HJ3-specific side chain and main chain hydrogen bonding analysis . . . .    | 165 |
| 92  | 5T42-1-specific side chain and main chain hydrogen bonding analysis . . . .  | 167 |
| 93  | 5T42-10-specific side chain and main chain hydrogen bonding analysis . . . . | 168 |
| 94  | 5T42-11-specific side chain and main chain hydrogen bonding analysis . . . . | 169 |
| 95  | 5T42-12-specific side chain and main chain hydrogen bonding analysis . . . . | 170 |
| 96  | 5T42-13-specific side chain and main chain hydrogen bonding analysis . . . . | 171 |
| 97  | 5T42-14-specific side chain and main chain hydrogen bonding analysis . . . . | 172 |
| 98  | 5T42-15-specific side chain and main chain hydrogen bonding analysis . . . . | 173 |
| 99  | 5T42-16-specific side chain and main chain hydrogen bonding analysis . . . . | 174 |
| 100 | 5T42-17-specific side chain and main chain hydrogen bonding analysis . . . . | 175 |
| 101 | 5T42-18-specific side chain and main chain hydrogen bonding analysis . . . . | 176 |
| 102 | 5T42-19-specific side chain and main chain hydrogen bonding analysis . . . . | 177 |
| 103 | 5T42-2-specific side chain and main chain hydrogen bonding analysis . . . .  | 178 |
| 104 | 5T42-20-specific side chain and main chain hydrogen bonding analysis . . . . | 179 |
| 105 | 5T42-3-specific side chain and main chain hydrogen bonding analysis . . . .  | 180 |
| 106 | 5T42-4-specific side chain and main chain hydrogen bonding analysis . . . .  | 181 |
| 107 | 5T42-5-specific side chain and main chain hydrogen bonding analysis . . . .  | 182 |
| 108 | 5T42-6-specific side chain and main chain hydrogen bonding analysis . . . .  | 183 |
| 109 | 5T42-7-specific side chain and main chain hydrogen bonding analysis . . . .  | 184 |
| 110 | 5T42-8-specific side chain and main chain hydrogen bonding analysis . . . .  | 185 |
| 111 | 5T42-9-specific side chain and main chain hydrogen bonding analysis . . . .  | 186 |
| 112 | 5HJ3-specific side chain hydrogen bonding analysis . . . . .                 | 187 |
| 113 | 5T42-9-specific side chain hydrogen bonding analysis . . . . .               | 188 |

## Supporting Material

| PDB ID | Residue A | Atom A | Residue B | Atom B | Distance (Å) |
|--------|-----------|--------|-----------|--------|--------------|
| 1EBO   | A_LYS_14  | NZ     | A_GLU_10  | OE2    | 3.109        |
| 1EBO   | A_ARG_79  | NH1    | A_ASP_113 | OD1    | 3.914        |
| 1EBO   | A_LYS_87  | NZ     | C_ASP_106 | OD2    | 3.887        |
| 1EBO   | A_HIS_112 | ND1    | B_GLU_77  | OE1    | 3.658        |
| 1EBO   | A_HIS_112 | ND1    | B_GLU_77  | OE2    | 3.104        |
| 1EBO   | A_LYS_116 | NZ     | A_ASP_120 | OD1    | 3.258        |
| 1EBO   | A_HIS_127 | ND1    | A_ASP_128 | OD1    | 2.733        |
| 1EBO   | B_LYS_14  | NZ     | B_GLU_10  | OE2    | 3.661        |
| 1EBO   | B_ARG_79  | NH1    | B_ASP_113 | OD1    | 3.995        |
| 1EBO   | B_HIS_112 | ND1    | C_GLU_77  | OE1    | 3.068        |
| 1EBO   | B_HIS_112 | ND1    | C_GLU_77  | OE2    | 2.658        |
| 1EBO   | B_LYS_116 | NZ     | B_ASP_120 | OD1    | 3.905        |
| 1EBO   | B_LYS_116 | NZ     | B_ASP_120 | OD2    | 3.784        |
| 1EBO   | B_HIS_127 | ND1    | B_ASP_128 | OD1    | 2.787        |
| 1EBO   | C_LYS_7   | NZ     | B_GLU_9   | OE1    | 3.472        |
| 1EBO   | C_LYS_14  | NZ     | C_GLU_10  | OE2    | 3.363        |
| 1EBO   | C_HIS_17  | NE2    | C_GLU_21  | OE2    | 3.656        |
| 1EBO   | C_LYS_26  | NZ     | A_GLU_21  | OE1    | 2.847        |
| 1EBO   | C_LYS_26  | NZ     | A_GLU_21  | OE2    | 3.880        |
| 1EBO   | C_ARG_79  | NH1    | C_ASP_113 | OD1    | 3.945        |
| 1EBO   | C_ARG_79  | NH2    | C_GLU_110 | OE2    | 3.323        |
| 1EBO   | C_LYS_87  | NZ     | B_ASP_106 | OD2    | 3.920        |
| 1EBO   | C_LYS_116 | NZ     | C_ASP_120 | OD1    | 3.226        |
| 1EBO   | C_HIS_127 | ND1    | C_ASP_128 | OD1    | 3.507        |
| 1EBO   | D_ARG_24  | NH1    | D_GLU_21  | OE2    | 3.453        |
| 1EBO   | D_HIS_112 | ND1    | E_GLU_77  | OE1    | 3.490        |
| 1EBO   | D_HIS_112 | ND1    | E_GLU_77  | OE2    | 2.696        |
| 1EBO   | D_HIS_127 | ND1    | D_ASP_128 | OD1    | 2.959        |
| 1EBO   | E_LYS_26  | NZ     | F_GLU_21  | OE2    | 3.162        |
| 1EBO   | E_ARG_79  | NH2    | E_GLU_110 | OE1    | 3.971        |
| 1EBO   | E_LYS_87  | NZ     | D_ASP_106 | OD2    | 3.925        |
| 1EBO   | E_LYS_116 | NZ     | E_ASP_120 | OD1    | 3.470        |
| 1EBO   | E_HIS_127 | ND1    | E_ASP_128 | OD1    | 2.619        |
| 1EBO   | F_LYS_26  | NZ     | D_GLU_21  | OE1    | 3.927        |
| 1EBO   | F_LYS_87  | NZ     | E_ASP_106 | OD2    | 3.651        |
| 1EBO   | F_HIS_112 | ND1    | D_GLU_77  | OE2    | 3.188        |
| 1EBO   | F_HIS_127 | ND1    | F_ASP_128 | OD1    | 2.746        |
| 2EBO   | A_HIS_613 | ND1    | B_GLU_578 | OE1    | 3.396        |
| 2EBO   | A_HIS_613 | ND1    | B_GLU_578 | OE2    | 3.211        |
| 2EBO   | A_LYS_617 | NZ     | A_ASP_621 | OD2    | 2.696        |
| 2EBO   | B_ARG_580 | NH1    | B_ASP_614 | OD2    | 3.885        |
| 2EBO   | B_HIS_613 | ND1    | C_GLU_578 | OE1    | 3.346        |
| 2EBO   | B_HIS_613 | ND1    | C_GLU_578 | OE2    | 2.789        |
| 2EBO   | C_HIS_628 | ND1    | C_ASP_629 | OD1    | 2.824        |
| 2QHR   | H_ARG_38  | NH1    | H_GLU_46  | OE1    | 2.994        |
| 2QHR   | H_ARG_38  | NH1    | H_GLU_46  | OE2    | 3.872        |
| 2QHR   | H_ARG_38  | NH1    | H_ASP_86  | OD1    | 3.831        |
| 2QHR   | H_ARG_38  | NH2    | H_ASP_86  | OD1    | 2.870        |
| 2QHR   | H_ARG_66  | NH1    | H_ASP_86  | OD1    | 3.110        |
| 2QHR   | H_ARG_66  | NH1    | H_ASP_86  | OD2    | 3.628        |
| 2QHR   | H_ARG_66  | NH2    | H_ASP_86  | OD1    | 3.793        |
| 2QHR   | H_ARG_66  | NH2    | H_ASP_86  | OD2    | 2.806        |
| 2QHR   | H_ARG_94  | NH2    | H_ASP_101 | OD1    | 3.235        |
| 2QHR   | H_ARG_94  | NH2    | H_ASP_101 | OD2    | 2.743        |
| 2QHR   | H_LYS_143 | NZ     | L_GLU_125 | OE2    | 2.743        |
| 2QHR   | H_HIS_164 | ND1    | L_GLU_168 | OE1    | 3.446        |
| 2QHR   | H_HIS_164 | ND1    | L_GLU_168 | OE2    | 2.691        |

|      |           |     |           |     |       |
|------|-----------|-----|-----------|-----|-------|
| 2QHR | H.LYS.205 | NZ  | H.ASP.207 | OD2 | 3.730 |
| 2QHR | H.LYS.208 | NZ  | L.GLU.124 | OE1 | 3.025 |
| 2QHR | H.LYS.208 | NZ  | L.GLU.124 | OE2 | 3.278 |
| 2QHR | L.ARG.61  | NH1 | L.ASP.82  | OD1 | 3.738 |
| 2QHR | L.ARG.61  | NH1 | L.ASP.82  | OD2 | 2.709 |
| 2QHR | L.ARG.61  | NH2 | L.ASP.82  | OD1 | 3.238 |
| 2QHR | L.ARG.61  | NH2 | L.ASP.82  | OD2 | 3.549 |
| 2QHR | L.LYS.111 | NZ  | L.ASP.200 | OD2 | 3.160 |
| 2QHR | L.LYS.150 | NZ  | L.GLU.203 | OE2 | 3.712 |
| 2QHR | L.LYS.167 | NZ  | L.GLU.83  | OE1 | 3.792 |
| 2QHR | L.HIS.179 | ND1 | L.ASP.161 | OD2 | 3.673 |
| 2QHR | L.LYS.204 | NZ  | H.ASP.130 | OD1 | 2.837 |
| 2QHR | L.LYS.204 | NZ  | H.ASP.130 | OD2 | 3.813 |
| 2QHR | P.HIS.407 | ND1 | L.ASP.92  | OD1 | 3.553 |
| 2QHR | P.ARG.409 | NH1 | H.ASP.33  | OD2 | 2.967 |
| 2QHR | P.ARG.410 | NH1 | P.ASP.414 | OD1 | 3.195 |
| 2QHR | P.ARG.410 | NH1 | P.ASP.414 | OD2 | 3.569 |
| 2Y6S | C.ARG.65  | NH1 | C.GLU.83  | OE1 | 3.999 |
| 2Y6S | C.ARG.65  | NH1 | C.GLU.85  | OE2 | 3.669 |
| 2Y6S | C.ARG.65  | NH1 | C.ASP.86  | OD1 | 2.662 |
| 2Y6S | C.ARG.65  | NH1 | C.ASP.86  | OD2 | 2.895 |
| 2Y6S | C.ARG.65  | NH2 | C.GLU.83  | OE1 | 3.359 |
| 2Y6S | C.ARG.65  | NH2 | C.GLU.83  | OE2 | 2.893 |
| 2Y6S | C.ARG.65  | NH2 | C.GLU.85  | OE2 | 3.603 |
| 2Y6S | C.ARG.100 | NH1 | D.GLU.50  | OE1 | 2.758 |
| 2Y6S | C.LYS.107 | NZ  | C.GLU.109 | OE2 | 3.166 |
| 2Y6S | C.LYS.107 | NZ  | C.ASP.169 | OD1 | 3.905 |
| 2Y6S | C.LYS.146 | NZ  | C.GLU.109 | OE1 | 2.925 |
| 2Y6S | C.LYS.146 | NZ  | C.GLU.109 | OE2 | 3.794 |
| 2Y6S | C.LYS.153 | NZ  | C.GLU.199 | OE2 | 3.238 |
| 2Y6S | C.ARG.159 | NH2 | C.GLU.189 | OE1 | 2.973 |
| 2Y6S | C.LYS.187 | NZ  | C.GLU.191 | OE1 | 3.081 |
| 2Y6S | C.LYS.187 | NZ  | C.GLU.191 | OE2 | 3.018 |
| 2Y6S | C.HIS.193 | ND1 | C.ASP.155 | OD2 | 3.103 |
| 2Y6S | C.LYS.203 | NZ  | C.ASP.114 | OD2 | 2.593 |
| 2Y6S | D.ARG.67  | NH1 | D.ASP.90  | OD1 | 2.837 |
| 2Y6S | D.ARG.67  | NH1 | D.ASP.90  | OD2 | 2.696 |
| 2Y6S | D.LYS.74  | NZ  | D.ASP.56  | OD1 | 3.129 |
| 2Y6S | D.LYS.74  | NZ  | D.ASP.56  | OD2 | 3.876 |
| 2Y6S | D.LYS.208 | NZ  | C.GLU.127 | OE1 | 3.225 |
| 2Y6S | H.ARG.67  | NH1 | H.ASP.90  | OD1 | 2.838 |
| 2Y6S | H.ARG.67  | NH1 | H.ASP.90  | OD2 | 2.694 |
| 2Y6S | H.LYS.74  | NZ  | H.ASP.56  | OD1 | 3.138 |
| 2Y6S | H.LYS.74  | NZ  | H.ASP.56  | OD2 | 3.860 |
| 2Y6S | H.LYS.208 | NZ  | L.GLU.127 | OE1 | 3.152 |
| 2Y6S | L.ARG.65  | NH1 | L.GLU.85  | OE2 | 3.674 |
| 2Y6S | L.ARG.65  | NH1 | L.ASP.86  | OD1 | 2.664 |
| 2Y6S | L.ARG.65  | NH1 | L.ASP.86  | OD2 | 2.893 |
| 2Y6S | L.ARG.65  | NH2 | L.GLU.83  | OE1 | 3.384 |
| 2Y6S | L.ARG.65  | NH2 | L.GLU.83  | OE2 | 2.916 |
| 2Y6S | L.ARG.65  | NH2 | L.GLU.85  | OE2 | 3.600 |
| 2Y6S | L.ARG.100 | NH1 | H.GLU.50  | OE1 | 2.759 |
| 2Y6S | L.ARG.100 | NH2 | H.GLU.50  | OE1 | 3.945 |
| 2Y6S | L.LYS.107 | NZ  | L.GLU.109 | OE2 | 3.165 |
| 2Y6S | L.LYS.107 | NZ  | L.ASP.169 | OD1 | 3.901 |
| 2Y6S | L.LYS.146 | NZ  | L.GLU.109 | OE1 | 2.917 |
| 2Y6S | L.LYS.146 | NZ  | L.GLU.109 | OE2 | 3.793 |
| 2Y6S | L.LYS.153 | NZ  | L.GLU.199 | OE2 | 3.234 |

|      |           |     |            |     |       |
|------|-----------|-----|------------|-----|-------|
| 2Y6S | L_ARG_159 | NH2 | L_GLU_189  | OE1 | 2.963 |
| 2Y6S | L_LYS_187 | NZ  | L_GLU_191  | OE1 | 3.077 |
| 2Y6S | L_LYS_187 | NZ  | L_GLU_191  | OE2 | 3.017 |
| 2Y6S | L_HIS_193 | ND1 | L_ASP_155  | OD2 | 3.115 |
| 2Y6S | L_LYS_203 | NZ  | L_ASP_114  | OD2 | 2.587 |
| 3CSY | A_ARG_33  | NH1 | A_GLU_95   | OE1 | 3.330 |
| 3CSY | A_ARG_33  | NH1 | A_GLU_95   | OE2 | 3.449 |
| 3CSY | A_ARG_38  | NH1 | A_GLU_46   | OE2 | 2.868 |
| 3CSY | A_ARG_38  | NH2 | A_ASP_86   | OD1 | 2.786 |
| 3CSY | A_ARG_66  | NH1 | A_ASP_86   | OD1 | 3.738 |
| 3CSY | A_ARG_66  | NH1 | A_ASP_86   | OD2 | 2.985 |
| 3CSY | A_ARG_66  | NH2 | A_ASP_86   | OD1 | 3.541 |
| 3CSY | A_ARG_94  | NH2 | A_ASP_101  | OD1 | 3.102 |
| 3CSY | A_ARG_94  | NH2 | A_ASP_101  | OD2 | 3.588 |
| 3CSY | A_ARG_98  | NH1 | A_ASP_100F | OD1 | 2.690 |
| 3CSY | A_ARG_98  | NH1 | A_ASP_100F | OD2 | 3.265 |
| 3CSY | A_LYS_145 | NZ  | A_ASP_146  | OD1 | 3.667 |
| 3CSY | A_LYS_145 | NZ  | A_ASP_146  | OD2 | 3.424 |
| 3CSY | A_LYS_221 | NZ  | B_GLU_123  | OE1 | 3.090 |
| 3CSY | A_LYS_221 | NZ  | B_GLU_123  | OE2 | 3.307 |
| 3CSY | A_LYS_222 | NZ  | A_GLU_226  | OE1 | 3.338 |
| 3CSY | B_LYS_24  | NZ  | B_ASP_70   | OD1 | 3.112 |
| 3CSY | B_LYS_24  | NZ  | B_ASP_70   | OD2 | 3.834 |
| 3CSY | B_ARG_61  | NH2 | B_GLU_81   | OE1 | 3.999 |
| 3CSY | B_ARG_61  | NH2 | B_ASP_82   | OD1 | 3.114 |
| 3CSY | B_ARG_61  | NH2 | B_ASP_82   | OD2 | 3.791 |
| 3CSY | B_ARG_142 | NH2 | B_GLU_165  | OE1 | 3.547 |
| 3CSY | B_LYS_149 | NZ  | B_GLU_195  | OE1 | 2.968 |
| 3CSY | B_LYS_188 | NZ  | B_ASP_185  | OD1 | 3.323 |
| 3CSY | B_HIS_189 | ND1 | B_ASP_151  | OD1 | 3.608 |
| 3CSY | B_HIS_189 | ND1 | B_ASP_151  | OD2 | 2.713 |
| 3CSY | C_ARG_33  | NH2 | C_GLU_95   | OE1 | 3.005 |
| 3CSY | C_ARG_33  | NH2 | C_GLU_95   | OE2 | 3.100 |
| 3CSY | C_ARG_38  | NH1 | C_GLU_46   | OE2 | 3.062 |
| 3CSY | C_ARG_38  | NH2 | C_ASP_86   | OD1 | 2.925 |
| 3CSY | C_ARG_66  | NH1 | C_ASP_86   | OD1 | 3.795 |
| 3CSY | C_ARG_66  | NH1 | C_ASP_86   | OD2 | 3.175 |
| 3CSY | C_ARG_66  | NH2 | C_ASP_86   | OD1 | 3.757 |
| 3CSY | C_ARG_94  | NH2 | C_ASP_101  | OD1 | 2.980 |
| 3CSY | C_ARG_94  | NH2 | C_ASP_101  | OD2 | 3.244 |
| 3CSY | C_ARG_98  | NH1 | C_ASP_100F | OD1 | 2.963 |
| 3CSY | C_ARG_98  | NH1 | C_ASP_100F | OD2 | 3.539 |
| 3CSY | C_LYS_145 | NZ  | C_ASP_146  | OD1 | 3.956 |
| 3CSY | C_HIS_172 | NE2 | D_ASP_167  | OD2 | 3.885 |
| 3CSY | C_LYS_221 | NZ  | D_GLU_123  | OE1 | 3.258 |
| 3CSY | C_LYS_221 | NZ  | D_GLU_123  | OE2 | 3.282 |
| 3CSY | C_LYS_222 | NZ  | C_GLU_226  | OE1 | 3.372 |
| 3CSY | D_LYS_24  | NZ  | D_ASP_70   | OD1 | 3.251 |
| 3CSY | D_LYS_24  | NZ  | D_ASP_70   | OD2 | 3.569 |
| 3CSY | D_ARG_61  | NH2 | D_ASP_82   | OD1 | 3.121 |
| 3CSY | D_ARG_61  | NH2 | D_ASP_82   | OD2 | 3.757 |
| 3CSY | D_ARG_142 | NH2 | D_GLU_165  | OE1 | 3.115 |
| 3CSY | D_LYS_149 | NZ  | D_GLU_195  | OE1 | 3.045 |
| 3CSY | D_HIS_189 | ND1 | D_ASP_151  | OD1 | 3.792 |
| 3CSY | D_HIS_189 | ND1 | D_ASP_151  | OD2 | 2.842 |
| 3CSY | E_ARG_33  | NH2 | E_GLU_95   | OE1 | 3.422 |
| 3CSY | E_ARG_33  | NH2 | E_GLU_95   | OE2 | 3.409 |
| 3CSY | E_ARG_38  | NH1 | E_GLU_46   | OE2 | 2.948 |

|      |           |     |            |     |       |
|------|-----------|-----|------------|-----|-------|
| 3CSY | E_ARG_38  | NH2 | E_ASP_86   | OD1 | 3.088 |
| 3CSY | E_ARG_66  | NH1 | E_ASP_86   | OD2 | 2.937 |
| 3CSY | E_ARG_66  | NH2 | E_ASP_86   | OD1 | 3.488 |
| 3CSY | E_ARG_66  | NH2 | E_ASP_86   | OD2 | 3.575 |
| 3CSY | E_ARG_94  | NH2 | E_ASP_101  | OD1 | 3.133 |
| 3CSY | E_ARG_94  | NH2 | E_ASP_101  | OD2 | 3.533 |
| 3CSY | E_ARG_98  | NH1 | E_ASP_100F | OD1 | 3.332 |
| 3CSY | E_ARG_98  | NH1 | E_ASP_100F | OD2 | 3.049 |
| 3CSY | E_LYS_145 | NZ  | E_ASP_146  | OD2 | 3.678 |
| 3CSY | E_LYS_221 | NZ  | F_GLU_123  | OE1 | 3.238 |
| 3CSY | E_LYS_221 | NZ  | F_GLU_123  | OE2 | 3.205 |
| 3CSY | E_LYS_222 | NZ  | E_GLU_226  | OE1 | 3.405 |
| 3CSY | F_LYS_24  | NZ  | F_ASP_70   | OD1 | 3.269 |
| 3CSY | F_LYS_24  | NZ  | F_ASP_70   | OD2 | 3.477 |
| 3CSY | F_ARG_61  | NH2 | F_GLU_81   | OE1 | 3.492 |
| 3CSY | F_ARG_61  | NH2 | F_ASP_82   | OD1 | 3.832 |
| 3CSY | F_ARG_142 | NH2 | F_GLU_165  | OE1 | 3.343 |
| 3CSY | F_LYS_149 | NZ  | F_GLU_195  | OE1 | 3.168 |
| 3CSY | F_LYS_188 | NZ  | F_ASP_185  | OD1 | 3.831 |
| 3CSY | F_HIS_189 | ND1 | F_ASP_151  | OD2 | 3.133 |
| 3CSY | G_ARG_33  | NH2 | G_GLU_95   | OE1 | 3.360 |
| 3CSY | G_ARG_33  | NH2 | G_GLU_95   | OE2 | 3.356 |
| 3CSY | G_ARG_38  | NH1 | G_GLU_46   | OE1 | 3.934 |
| 3CSY | G_ARG_38  | NH1 | G_GLU_46   | OE2 | 3.037 |
| 3CSY | G_ARG_38  | NH2 | G_ASP_86   | OD1 | 2.730 |
| 3CSY | G_ARG_66  | NH1 | G_ASP_86   | OD2 | 2.862 |
| 3CSY | G_ARG_66  | NH2 | G_ASP_86   | OD1 | 3.483 |
| 3CSY | G_ARG_66  | NH2 | G_ASP_86   | OD2 | 3.538 |
| 3CSY | G_ARG_94  | NH2 | G_ASP_101  | OD1 | 3.059 |
| 3CSY | G_ARG_98  | NH1 | G_ASP_100F | OD1 | 2.838 |
| 3CSY | G_ARG_98  | NH1 | G_ASP_100F | OD2 | 3.524 |
| 3CSY | G_LYS_145 | NZ  | G_ASP_146  | OD2 | 3.536 |
| 3CSY | G_HIS_172 | NE2 | H_ASP_167  | OD2 | 3.733 |
| 3CSY | G_LYS_221 | NZ  | H_GLU_123  | OE1 | 3.440 |
| 3CSY | G_LYS_221 | NZ  | H_GLU_123  | OE2 | 3.445 |
| 3CSY | G_LYS_222 | NZ  | G_GLU_226  | OE1 | 3.676 |
| 3CSY | H_LYS_24  | NZ  | H_ASP_70   | OD1 | 3.595 |
| 3CSY | H_LYS_24  | NZ  | H_ASP_70   | OD2 | 3.439 |
| 3CSY | H_ARG_61  | NH2 | H_GLU_81   | OE1 | 3.520 |
| 3CSY | H_ARG_61  | NH2 | H_ASP_82   | OD1 | 3.815 |
| 3CSY | H_ARG_61  | NH2 | H_ASP_82   | OD2 | 3.245 |
| 3CSY | H_ARG_142 | NH2 | H_GLU_165  | OE1 | 3.557 |
| 3CSY | H_LYS_149 | NZ  | H_GLU_195  | OE1 | 3.085 |
| 3CSY | H_HIS_189 | ND1 | H_ASP_151  | OD1 | 3.553 |
| 3CSY | H_HIS_189 | ND1 | H_ASP_151  | OD2 | 2.707 |
| 3CSY | I_ARG_64  | NH1 | I_GLU_100  | OE2 | 2.693 |
| 3CSY | I_ARG_85  | NH2 | I_GLU_178  | OE1 | 2.760 |
| 3CSY | I_ARG_85  | NH2 | I_GLU_178  | OE2 | 2.883 |
| 3CSY | I_LYS_114 | NZ  | I_GLU_120  | OE2 | 3.520 |
| 3CSY | I_ARG_130 | NH2 | I_ASP_163  | OD2 | 2.701 |
| 3CSY | I_ARG_134 | NH1 | J_GLU_545  | OE2 | 3.043 |
| 3CSY | I_ARG_136 | NH1 | I_GLU_106  | OE2 | 3.755 |
| 3CSY | I_HIS_154 | NE2 | I_GLU_178  | OE2 | 2.796 |
| 3CSY | I_ARG_164 | NH2 | I_ASP_163  | OD1 | 3.175 |
| 3CSY | I_ARG_164 | NH2 | I_ASP_163  | OD2 | 3.157 |
| 3CSY | J_ARG_559 | NH2 | I_GLU_103  | OE1 | 3.261 |
| 3CSY | J_ARG_559 | NH2 | I_GLU_103  | OE2 | 3.005 |
| 3CSY | K_ARG_64  | NH1 | K_GLU_100  | OE2 | 3.248 |

|      |           |     |           |     |       |
|------|-----------|-----|-----------|-----|-------|
| 3CSY | K_ARG.85  | NH2 | K_GLU.178 | OE1 | 2.723 |
| 3CSY | K_ARG.85  | NH2 | K_GLU.178 | OE2 | 3.019 |
| 3CSY | K_LYS.114 | NZ  | K_GLU.120 | OE1 | 3.499 |
| 3CSY | K_ARG.130 | NH1 | K_ASP.163 | OD2 | 2.845 |
| 3CSY | K_ARG.134 | NH1 | L_GLU.545 | OE2 | 3.181 |
| 3CSY | K_ARG.136 | NH1 | K_GLU.106 | OE2 | 3.184 |
| 3CSY | K_HIS.154 | NE2 | K_GLU.178 | OE2 | 2.720 |
| 3CSY | K_ARG.164 | NH2 | K_ASP.163 | OD1 | 3.547 |
| 3CSY | K_ARG.164 | NH2 | K_ASP.163 | OD2 | 3.244 |
| 3CSY | L_ARG.559 | NH2 | K_GLU.103 | OE1 | 3.317 |
| 3CSY | L_ARG.559 | NH2 | K_GLU.103 | OE2 | 3.156 |
| 3CSY | M_ARG.64  | NH1 | M_GLU.100 | OE2 | 2.845 |
| 3CSY | M_ARG.85  | NH2 | M_GLU.178 | OE1 | 2.759 |
| 3CSY | M_ARG.85  | NH2 | M_GLU.178 | OE2 | 3.004 |
| 3CSY | M_ARG.130 | NH1 | M_ASP.163 | OD2 | 2.888 |
| 3CSY | M_ARG.134 | NH1 | N_GLU.545 | OE2 | 2.894 |
| 3CSY | M_ARG.136 | NH1 | M_GLU.106 | OE2 | 3.351 |
| 3CSY | M_HIS.154 | NE2 | M_GLU.178 | OE2 | 2.684 |
| 3CSY | M_ARG.164 | NH2 | M_ASP.163 | OD1 | 3.214 |
| 3CSY | M_ARG.164 | NH2 | M_ASP.163 | OD2 | 3.477 |
| 3CSY | N_ARG.559 | NH2 | M_GLU.103 | OE1 | 2.925 |
| 3CSY | N_ARG.559 | NH2 | M_GLU.103 | OE2 | 3.048 |
| 3CSY | O_ARG.64  | NH1 | O_GLU.100 | OE2 | 2.902 |
| 3CSY | O_ARG.85  | NH2 | O_GLU.178 | OE1 | 3.008 |
| 3CSY | O_ARG.85  | NH2 | O_GLU.178 | OE2 | 3.292 |
| 3CSY | O_ARG.130 | NH1 | O_ASP.163 | OD2 | 2.770 |
| 3CSY | O_ARG.130 | NH2 | O_ASP.163 | OD2 | 3.071 |
| 3CSY | O_ARG.134 | NH1 | P_GLU.545 | OE2 | 3.026 |
| 3CSY | O_ARG.136 | NH1 | O_GLU.106 | OE2 | 3.514 |
| 3CSY | O_HIS.154 | NE2 | O_GLU.178 | OE2 | 2.770 |
| 3CSY | O_ARG.164 | NH2 | O_ASP.163 | OD1 | 3.340 |
| 3CSY | O_ARG.164 | NH2 | O_ASP.163 | OD2 | 3.003 |
| 3CSY | P_ARG.559 | NH2 | O_GLU.103 | OE1 | 3.054 |
| 3CSY | P_ARG.559 | NH2 | O_GLU.103 | OE2 | 2.808 |
| 3VE0 | I_LYS.64  | NZ  | I_GLU.100 | OE1 | 3.434 |
| 3VE0 | I_ARG.85  | NH2 | I_GLU.178 | OE1 | 3.938 |
| 3VE0 | I_ARG.85  | NH2 | I_GLU.178 | OE2 | 2.598 |
| 3VE0 | I_ARG.130 | NH1 | I_ASP.163 | OD2 | 3.227 |
| 3VE0 | I_HIS.154 | NE2 | I_GLU.178 | OE1 | 2.497 |
| 3VE0 | I_ARG.164 | NH1 | I_ASP.163 | OD1 | 2.966 |
| 3VE0 | I_ARG.164 | NH1 | I_ASP.163 | OD2 | 2.614 |
| 3VE0 | I_ARG.164 | NH2 | I_ASP.163 | OD2 | 3.976 |
| 3VE0 | I_ARG.172 | NH1 | I_GLU.112 | OE1 | 3.788 |
| 3VE0 | I_ARG.172 | NH1 | I_GLU.112 | OE2 | 3.022 |
| 3VE0 | I_ARG.172 | NH1 | I_GLU.120 | OE1 | 3.786 |
| 3VE0 | J_HIS.516 | ND1 | J_GLU.545 | OE1 | 3.938 |
| 3VE0 | J_ARG.559 | NH1 | I_GLU.103 | OE1 | 3.852 |
| 3VE0 | J_ARG.559 | NH1 | I_GLU.103 | OE2 | 3.848 |
| 3VE0 | J_ARG.559 | NH2 | I_GLU.103 | OE1 | 2.444 |
| 3VE0 | J_ARG.559 | NH2 | I_GLU.103 | OE2 | 2.766 |
| 3VE0 | J_ARG.595 | NH1 | J_ASP.591 | OD2 | 3.637 |
| 3VE0 | J_ARG.595 | NH2 | I_ASP.49  | OD2 | 3.842 |
| 3VE0 | J_ARG.596 | NH1 | I_ASP.55  | OD1 | 3.003 |
| 3VE0 | A_ARG.38  | NH1 | A_ASP.90  | OD2 | 2.796 |
| 3VE0 | A_ARG.38  | NH2 | A_GLU.46  | OE1 | 2.957 |
| 3VE0 | A_ARG.38  | NH2 | A_ASP.90  | OD2 | 3.833 |
| 3VE0 | A_ARG.67  | NH1 | A_ASP.90  | OD1 | 2.638 |
| 3VE0 | A_ARG.67  | NH1 | A_ASP.90  | OD2 | 3.818 |

|      |           |     |           |     |       |
|------|-----------|-----|-----------|-----|-------|
| 3VE0 | A_ARG_67  | NH2 | A_ASP_90  | OD1 | 3.519 |
| 3VE0 | A_ARG_67  | NH2 | A_ASP_90  | OD2 | 3.251 |
| 3VE0 | A_ARG_87  | NH2 | A_GLU_89  | OE1 | 3.633 |
| 3VE0 | A_ARG_98  | NH2 | I_GLU_44  | OE1 | 3.137 |
| 3VE0 | A_ARG_98  | NH2 | I_GLU_44  | OE2 | 3.008 |
| 3VE0 | A_ARG_98  | NH2 | A_ASP_107 | OD1 | 3.467 |
| 3VE0 | A_LYS_214 | NZ  | B_GLU_123 | OE1 | 3.666 |
| 3VE0 | A_LYS_214 | NZ  | B_GLU_123 | OE2 | 2.624 |
| 3VE0 | A_ARG_219 | NH1 | A_ASP_220 | OD1 | 3.088 |
| 3VE0 | B_ARG_54  | NH2 | B_ASP_60  | OD1 | 3.562 |
| 3VE0 | B_ARG_61  | NH1 | B_GLU_81  | OE1 | 3.512 |
| 3VE0 | B_ARG_61  | NH1 | B_ASP_82  | OD2 | 3.714 |
| 3VE0 | B_ARG_61  | NH2 | B_GLU_81  | OE1 | 3.757 |
| 3VE0 | B_ARG_61  | NH2 | B_GLU_81  | OE2 | 3.987 |
| 3VE0 | B_LYS_103 | NZ  | B_GLU_105 | OE1 | 3.337 |
| 3VE0 | B_LYS_149 | NZ  | B_GLU_195 | OE1 | 3.446 |
| 3VE0 | B_LYS_149 | NZ  | B_GLU_195 | OE2 | 2.550 |
| 3VE0 | B_ARG_155 | NH1 | B_GLU_185 | OE1 | 2.325 |
| 3VE0 | B_ARG_155 | NH1 | B_GLU_185 | OE2 | 3.974 |
| 3VE0 | B_ARG_155 | NH2 | B_GLU_185 | OE1 | 3.539 |
| 3VE0 | B_ARG_155 | NH2 | B_GLU_185 | OE2 | 3.905 |
| 3VE0 | B_HIS_189 | ND1 | B_ASP_151 | OD1 | 3.017 |
| 5F1B | A_HIS_39  | NE2 | A_ASP_55  | OD1 | 3.999 |
| 5F1B | A_ARG_64  | NH1 | A_GLU_100 | OE1 | 3.273 |
| 5F1B | A_ARG_64  | NH1 | A_GLU_100 | OE2 | 3.876 |
| 5F1B | A_ARG_85  | NH2 | A_GLU_178 | OE1 | 2.662 |
| 5F1B | A_ARG_85  | NH2 | A_GLU_178 | OE2 | 3.814 |
| 5F1B | A_ARG_130 | NH2 | A_ASP_163 | OD2 | 3.180 |
| 5F1B | A_ARG_134 | NH1 | B_GLU_545 | OE2 | 3.659 |
| 5F1B | A_HIS_154 | NE2 | A_GLU_178 | OE2 | 2.611 |
| 5F1B | A_ARG_164 | NH2 | A_ASP_163 | OD1 | 3.605 |
| 5F1B | A_ARG_164 | NH2 | A_ASP_163 | OD2 | 3.318 |
| 5F1B | B_HIS_516 | NE2 | B_GLU_545 | OE1 | 3.961 |
| 5F1B | B_ARG_559 | NH1 | A_GLU_103 | OE1 | 3.219 |
| 5F1B | B_ARG_559 | NH1 | A_GLU_103 | OE2 | 3.449 |
| 5F1B | B_ARG_559 | NH2 | A_GLU_103 | OE1 | 3.928 |
| 5F1B | B_ARG_559 | NH2 | A_GLU_103 | OE2 | 2.697 |
| 5F1B | B_LYS_588 | NZ  | A_ASP_47  | OD1 | 3.551 |
| 5F1B | B_LYS_588 | NZ  | A_ASP_47  | OD2 | 3.521 |
| 5F1B | C_ARG_32  | NH1 | C_GLU_34  | OE1 | 3.894 |
| 5F1B | C_ARG_32  | NH1 | C_GLU_212 | OE2 | 3.039 |
| 5F1B | C_ARG_32  | NH2 | C_GLU_212 | OE2 | 3.122 |
| 5F1B | C_HIS_69  | NE2 | C_ASP_124 | OD1 | 2.595 |
| 5F1B | C_HIS_69  | NE2 | C_ASP_124 | OD2 | 3.426 |
| 5F1B | C_HIS_120 | NE2 | C_ASP_73  | OD1 | 3.129 |
| 5F1B | C_HIS_125 | ND1 | C_ASP_159 | OD1 | 3.361 |
| 5F1B | C_HIS_125 | ND1 | C_ASP_159 | OD2 | 2.705 |
| 5F1B | C_HIS_138 | ND1 | C_ASP_136 | OD1 | 3.569 |
| 5F1B | C_HIS_138 | ND1 | C_ASP_136 | OD2 | 2.668 |
| 5F1B | C_HIS_140 | ND1 | C_ASP_153 | OD2 | 2.612 |
| 5F1B | C_LYS_204 | NZ  | C_ASP_201 | OD2 | 2.921 |
| 5F1B | C_ARG_207 | NH2 | C_ASP_86  | OD2 | 3.888 |
| 5F1B | C_ARG_207 | NH2 | C_GLU_88  | OE1 | 2.527 |
| 5F1B | C_ARG_207 | NH2 | C_GLU_88  | OE2 | 3.562 |
| 5FHC | J_ARG_559 | NH2 | K_GLU_103 | OE1 | 3.531 |
| 5FHC | J_ARG_559 | NH2 | K_GLU_103 | OE2 | 3.399 |
| 5FHC | K_ARG_64  | NH1 | K_GLU_100 | OE2 | 3.218 |
| 5FHC | K_ARG_85  | NH2 | K_GLU_178 | OE1 | 2.651 |

|      |           |     |           |     |       |
|------|-----------|-----|-----------|-----|-------|
| 5FHC | K_ARG_85  | NH2 | K_GLU_178 | OE2 | 3.046 |
| 5FHC | K_LYS_114 | NZ  | K_GLU_112 | OE1 | 3.499 |
| 5FHC | K_LYS_114 | NZ  | K_GLU_120 | OE1 | 3.155 |
| 5FHC | K_ARG_130 | NH1 | K_ASP_163 | OD2 | 2.715 |
| 5FHC | K_ARG_134 | NH1 | J_GLU_545 | OE2 | 2.861 |
| 5FHC | K_ARG_136 | NH1 | K_GLU_106 | OE2 | 3.301 |
| 5FHC | K_HIS_154 | NE2 | K_GLU_178 | OE2 | 2.716 |
| 5FHC | K_ARG_164 | NH2 | K_ASP_163 | OD1 | 3.639 |
| 5FHC | K_ARG_164 | NH2 | K_ASP_163 | OD2 | 3.655 |
| 5FHC | A_ARG_38  | NH1 | A_ASP_86  | OD1 | 2.921 |
| 5FHC | A_ARG_38  | NH2 | A_GLU_46  | OE1 | 3.040 |
| 5FHC | A_ARG_38  | NH2 | A_GLU_46  | OE2 | 3.982 |
| 5FHC | A_ARG_38  | NH2 | A_ASP_86  | OD1 | 3.615 |
| 5FHC | A_ARG_66  | NH1 | A_ASP_86  | OD1 | 3.508 |
| 5FHC | A_ARG_66  | NH2 | A_ASP_86  | OD1 | 3.465 |
| 5FHC | A_ARG_66  | NH2 | A_ASP_86  | OD2 | 2.756 |
| 5FHC | A_ARG_94  | NH2 | A_ASP_101 | OD1 | 3.473 |
| 5FHC | A_ARG_94  | NH2 | A_ASP_101 | OD2 | 3.241 |
| 5FHC | A_LYS_143 | NZ  | B_GLU_124 | OE2 | 2.678 |
| 5FHC | A_LYS_209 | NZ  | B_GLU_123 | OE1 | 2.702 |
| 5FHC | A_LYS_209 | NZ  | B_GLU_123 | OE2 | 3.358 |
| 5FHC | B_ARG_39  | NH2 | B_ASP_82  | OD1 | 3.944 |
| 5FHC | B_ARG_61  | NH1 | B_ASP_82  | OD1 | 3.826 |
| 5FHC | B_ARG_61  | NH1 | B_ASP_82  | OD2 | 2.658 |
| 5FHC | B_ARG_61  | NH2 | B_ASP_82  | OD1 | 2.976 |
| 5FHC | B_ARG_61  | NH2 | B_ASP_82  | OD2 | 3.232 |
| 5FHC | B_LYS_103 | NZ  | B_ASP_85  | OD1 | 2.875 |
| 5FHC | B_LYS_103 | NZ  | B_ASP_85  | OD2 | 3.594 |
| 5FHC | B_LYS_149 | NZ  | B_GLU_203 | OE1 | 3.331 |
| 5FHC | B_LYS_149 | NZ  | B_GLU_203 | OE2 | 3.999 |
| 5FHC | L_ARG_61  | NH1 | L_GLU_81  | OE2 | 3.402 |
| 5FHC | L_ARG_61  | NH1 | L_ASP_82  | OD1 | 2.944 |
| 5FHC | L_ARG_61  | NH1 | L_ASP_82  | OD2 | 3.402 |
| 5FHC | L_LYS_103 | NZ  | L_GLU_165 | OE2 | 3.468 |
| 5FHC | L_LYS_149 | NZ  | L_GLU_195 | OE2 | 2.669 |
| 5FHC | L_LYS_183 | NZ  | L_GLU_187 | OE2 | 2.948 |
| 5FHC | L_HIS_189 | ND1 | L_ASP_151 | OD2 | 3.045 |
| 5FHC | H_ARG_38  | NH1 | H_ASP_86  | OD1 | 2.743 |
| 5FHC | H_ARG_38  | NH2 | H_GLU_46  | OE1 | 3.708 |
| 5FHC | H_ARG_38  | NH2 | H_GLU_46  | OE2 | 3.194 |
| 5FHC | H_ARG_38  | NH2 | H_ASP_86  | OD1 | 3.696 |
| 5FHC | H_LYS_64  | NZ  | H_ASP_61  | OD1 | 3.953 |
| 5FHC | H_ARG_66  | NH1 | H_ASP_86  | OD1 | 3.816 |
| 5FHC | H_ARG_66  | NH1 | H_ASP_86  | OD2 | 2.875 |
| 5FHC | H_ARG_66  | NH2 | H_ASP_86  | OD1 | 3.199 |
| 5FHC | H_ARG_66  | NH2 | H_ASP_86  | OD2 | 3.692 |
| 5FHC | H_LYS_75  | NZ  | H_GLU_72  | OE1 | 3.342 |
| 5FHC | H_LYS_75  | NZ  | H_GLU_72  | OE2 | 3.694 |
| 5FHC | H_ARG_94  | NH2 | H_ASP_101 | OD1 | 3.811 |
| 5FHC | H_ARG_94  | NH2 | H_ASP_101 | OD2 | 3.111 |
| 5FHC | H_LYS_143 | NZ  | H_ASP_144 | OD1 | 3.605 |
| 5FHC | H_LYS_209 | NZ  | L_GLU_123 | OE1 | 3.238 |
| 5FHC | H_LYS_209 | NZ  | L_GLU_123 | OE2 | 3.173 |
| 5FHC | H_LYS_210 | NZ  | H_GLU_212 | OE1 | 3.977 |
| 5FHC | H_LYS_210 | NZ  | H_GLU_212 | OE2 | 2.157 |
| 5HJ3 | C_HIS_39  | NE2 | C_ASP_55  | OD1 | 3.393 |
| 5HJ3 | C_ARG_64  | NH1 | C_GLU_100 | OE2 | 3.438 |
| 5HJ3 | C_ARG_85  | NH1 | C_GLU_178 | OE1 | 3.195 |

|      |           |     |            |     |       |
|------|-----------|-----|------------|-----|-------|
| 5HJ3 | C_ARG_85  | NH2 | C_GLU_178  | OE1 | 2.394 |
| 5HJ3 | C_ARG_85  | NH2 | C_GLU_178  | OE2 | 2.812 |
| 5HJ3 | C_ARG_130 | NH2 | C_ASP_163  | OD2 | 3.561 |
| 5HJ3 | C_ARG_136 | NH2 | C_GLU_106  | OE2 | 3.743 |
| 5HJ3 | C_HIS_154 | NE2 | C_GLU_178  | OE2 | 2.920 |
| 5HJ3 | C_ARG_164 | NH2 | C_ASP_163  | OD1 | 3.508 |
| 5HJ3 | C_ARG_164 | NH2 | C_ASP_163  | OD2 | 2.651 |
| 5HJ3 | D_LYS_510 | NZ  | J_GLU_55   | OE1 | 3.743 |
| 5HJ3 | D_LYS_510 | NZ  | J_GLU_55   | OE2 | 3.493 |
| 5HJ3 | D_HIS_516 | NE2 | D_GLU_545  | OE1 | 2.622 |
| 5HJ3 | D_ARG_559 | NH2 | C_GLU_103  | OE1 | 2.496 |
| 5HJ3 | D_ARG_559 | NH2 | C_GLU_103  | OE2 | 2.573 |
| 5HJ3 | E_ARG_33  | NH1 | E_GLU_95   | OE1 | 3.015 |
| 5HJ3 | E_ARG_33  | NH1 | E_GLU_95   | OE2 | 3.055 |
| 5HJ3 | E_ARG_38  | NH1 | E_GLU_46   | OE1 | 3.787 |
| 5HJ3 | E_ARG_38  | NH1 | E_GLU_46   | OE2 | 2.695 |
| 5HJ3 | E_ARG_38  | NH2 | E_ASP_86   | OD1 | 2.624 |
| 5HJ3 | E_ARG_66  | NH1 | E_ASP_86   | OD1 | 3.916 |
| 5HJ3 | E_ARG_66  | NH1 | E_ASP_86   | OD2 | 2.722 |
| 5HJ3 | E_ARG_66  | NH2 | E_ASP_86   | OD1 | 3.391 |
| 5HJ3 | E_ARG_66  | NH2 | E_ASP_86   | OD2 | 3.561 |
| 5HJ3 | E_ARG_94  | NH2 | E_ASP_101  | OD1 | 3.948 |
| 5HJ3 | E_ARG_94  | NH2 | E_ASP_101  | OD2 | 2.561 |
| 5HJ3 | E_ARG_98  | NH1 | E_ASP_100F | OD1 | 3.696 |
| 5HJ3 | E_ARG_98  | NH1 | E_ASP_100F | OD2 | 2.997 |
| 5HJ3 | E_LYS_145 | NZ  | E_ASP_146  | OD1 | 2.852 |
| 5HJ3 | E_LYS_145 | NZ  | E_ASP_146  | OD2 | 2.810 |
| 5HJ3 | E_LYS_221 | NZ  | F_GLU_123  | OE2 | 3.658 |
| 5HJ3 | F_ARG_61  | NH2 | F_ASP_82   | OD1 | 3.037 |
| 5HJ3 | F_ARG_61  | NH2 | F_ASP_82   | OD2 | 3.919 |
| 5HJ3 | F_ARG_142 | NH2 | F_GLU_105  | OE1 | 2.744 |
| 5HJ3 | G_HIS_39  | NE2 | G_ASP_55   | OD1 | 3.217 |
| 5HJ3 | G_ARG_64  | NH1 | G_GLU_100  | OE2 | 3.233 |
| 5HJ3 | G_ARG_85  | NH1 | G_GLU_178  | OE1 | 3.267 |
| 5HJ3 | G_ARG_85  | NH2 | G_GLU_178  | OE1 | 2.478 |
| 5HJ3 | G_ARG_85  | NH2 | G_GLU_178  | OE2 | 2.771 |
| 5HJ3 | G_ARG_130 | NH2 | G_ASP_163  | OD2 | 3.392 |
| 5HJ3 | G_HIS_154 | NE2 | G_GLU_178  | OE2 | 2.990 |
| 5HJ3 | G_ARG_164 | NH2 | G_ASP_163  | OD1 | 3.521 |
| 5HJ3 | G_ARG_164 | NH2 | G_ASP_163  | OD2 | 2.692 |
| 5HJ3 | H_LYS_510 | NZ  | F_GLU_55   | OE2 | 3.815 |
| 5HJ3 | H_HIS_516 | NE2 | H_GLU_545  | OE1 | 2.614 |
| 5HJ3 | H_ARG_559 | NH2 | G_GLU_103  | OE1 | 2.521 |
| 5HJ3 | H_ARG_559 | NH2 | G_GLU_103  | OE2 | 2.719 |
| 5HJ3 | I_ARG_33  | NH1 | I_GLU_95   | OE1 | 2.790 |
| 5HJ3 | I_ARG_33  | NH1 | I_GLU_95   | OE2 | 3.012 |
| 5HJ3 | I_ARG_38  | NH1 | I_GLU_46   | OE1 | 3.771 |
| 5HJ3 | I_ARG_38  | NH1 | I_GLU_46   | OE2 | 2.572 |
| 5HJ3 | I_ARG_38  | NH2 | I_ASP_86   | OD1 | 2.596 |
| 5HJ3 | I_ARG_66  | NH1 | I_ASP_86   | OD2 | 2.716 |
| 5HJ3 | I_ARG_66  | NH2 | I_ASP_86   | OD1 | 3.241 |
| 5HJ3 | I_ARG_66  | NH2 | I_ASP_86   | OD2 | 3.167 |
| 5HJ3 | I_ARG_94  | NH2 | I_ASP_101  | OD1 | 3.512 |
| 5HJ3 | I_ARG_94  | NH2 | I_ASP_101  | OD2 | 2.751 |
| 5HJ3 | I_ARG_98  | NH1 | I_ASP_100F | OD1 | 3.834 |
| 5HJ3 | I_ARG_98  | NH1 | I_ASP_100F | OD2 | 3.081 |
| 5HJ3 | I_LYS_145 | NZ  | I_ASP_146  | OD1 | 2.788 |
| 5HJ3 | I_LYS_145 | NZ  | I_ASP_146  | OD2 | 2.739 |

|      |           |     |            |     |       |
|------|-----------|-----|------------|-----|-------|
| 5HJ3 | I_HIS_172 | NE2 | J_ASP_167  | OD2 | 3.705 |
| 5HJ3 | I_LYS_221 | NZ  | J_GLU_123  | OE1 | 3.253 |
| 5HJ3 | I_LYS_221 | NZ  | J_GLU_123  | OE2 | 2.800 |
| 5HJ3 | J_ARG_61  | NH2 | J_ASP_82   | OD1 | 2.701 |
| 5HJ3 | J_ARG_61  | NH2 | J_ASP_82   | OD2 | 3.572 |
| 5HJ3 | J_ARG_142 | NH2 | J_GLU_105  | OE1 | 2.682 |
| 5HJ3 | J_LYS_145 | NZ  | J_GLU_161  | OE2 | 3.678 |
| 5HJ3 | J_LYS_149 | NZ  | J_GLU_195  | OE1 | 2.603 |
| 5HJ3 | J_LYS_188 | NZ  | J_ASP_185  | OD2 | 3.757 |
| 5HJ3 | J_HIS_189 | ND1 | J_ASP_151  | OD1 | 3.934 |
| 5HJ3 | J_HIS_189 | ND1 | J_ASP_151  | OD2 | 2.742 |
| 5HJ3 | K_HIS_39  | NE2 | K_ASP_55   | OD1 | 3.802 |
| 5HJ3 | K_ARG_64  | NH1 | K_GLU_100  | OE2 | 3.581 |
| 5HJ3 | K_ARG_85  | NH1 | K_GLU_178  | OE1 | 3.179 |
| 5HJ3 | K_ARG_85  | NH2 | K_GLU_178  | OE1 | 2.573 |
| 5HJ3 | K_ARG_85  | NH2 | K_GLU_178  | OE2 | 2.682 |
| 5HJ3 | K_ARG_130 | NH2 | K_ASP_163  | OD2 | 3.783 |
| 5HJ3 | K_HIS_154 | NE2 | K_GLU_178  | OE2 | 3.079 |
| 5HJ3 | K_ARG_164 | NH2 | K_ASP_163  | OD1 | 3.726 |
| 5HJ3 | K_ARG_164 | NH2 | K_ASP_163  | OD2 | 2.770 |
| 5HJ3 | L_HIS_516 | NE2 | L_GLU_545  | OE1 | 2.683 |
| 5HJ3 | L_ARG_559 | NH2 | K_GLU_103  | OE1 | 2.680 |
| 5HJ3 | L_ARG_559 | NH2 | K_GLU_103  | OE2 | 2.484 |
| 5HJ3 | L_HIS_602 | ND1 | H_GLU_611  | OE1 | 3.679 |
| 5HJ3 | L_HIS_602 | NE2 | H_GLU_611  | OE1 | 3.945 |
| 5HJ3 | M_ARG_33  | NH1 | M_GLU_95   | OE1 | 2.923 |
| 5HJ3 | M_ARG_33  | NH1 | M_GLU_95   | OE2 | 2.923 |
| 5HJ3 | M_ARG_38  | NH1 | M_ASP_86   | OD1 | 3.188 |
| 5HJ3 | M_ARG_38  | NH2 | M_GLU_46   | OE1 | 3.623 |
| 5HJ3 | M_ARG_38  | NH2 | M_GLU_46   | OE2 | 2.841 |
| 5HJ3 | M_ARG_66  | NH1 | M_ASP_86   | OD1 | 3.810 |
| 5HJ3 | M_ARG_66  | NH1 | M_ASP_86   | OD2 | 2.388 |
| 5HJ3 | M_ARG_66  | NH2 | M_ASP_86   | OD1 | 2.897 |
| 5HJ3 | M_ARG_66  | NH2 | M_ASP_86   | OD2 | 2.965 |
| 5HJ3 | M_ARG_94  | NH2 | M_ASP_101  | OD1 | 3.853 |
| 5HJ3 | M_ARG_94  | NH2 | M_ASP_101  | OD2 | 2.629 |
| 5HJ3 | M_ARG_98  | NH1 | M_ASP_100F | OD1 | 3.630 |
| 5HJ3 | M_ARG_98  | NH1 | M_ASP_100F | OD2 | 2.969 |
| 5HJ3 | M_LYS_145 | NZ  | M_ASP_146  | OD1 | 3.782 |
| 5HJ3 | M_LYS_145 | NZ  | M_ASP_146  | OD2 | 3.675 |
| 5HJ3 | M_LYS_221 | NZ  | N_GLU_123  | OE1 | 3.397 |
| 5HJ3 | M_LYS_221 | NZ  | N_GLU_123  | OE2 | 3.011 |
| 5HJ3 | N_ARG_61  | NH2 | N_ASP_82   | OD1 | 3.282 |
| 5HJ3 | N_ARG_142 | NH2 | N_GLU_105  | OE1 | 2.640 |
| 5HJ3 | N_LYS_149 | NZ  | N_GLU_195  | OE1 | 2.786 |
| 5HJ3 | O_HIS_39  | NE2 | O_ASP_55   | OD1 | 3.321 |
| 5HJ3 | O_ARG_64  | NH1 | O_GLU_100  | OE2 | 3.235 |
| 5HJ3 | O_ARG_85  | NH1 | O_GLU_178  | OE1 | 3.339 |
| 5HJ3 | O_ARG_85  | NH2 | O_GLU_178  | OE1 | 2.457 |
| 5HJ3 | O_ARG_85  | NH2 | O_GLU_178  | OE2 | 2.948 |
| 5HJ3 | O_ARG_130 | NH2 | O_ASP_163  | OD2 | 3.468 |
| 5HJ3 | O_ARG_136 | NH2 | O_GLU_106  | OE2 | 3.955 |
| 5HJ3 | O_HIS_154 | NE2 | O_GLU_178  | OE2 | 2.840 |
| 5HJ3 | O_ARG_164 | NH2 | O_ASP_163  | OD1 | 3.663 |
| 5HJ3 | O_ARG_164 | NH2 | O_ASP_163  | OD2 | 2.780 |
| 5HJ3 | P_LYS_510 | NZ  | B_GLU_55   | OE1 | 3.843 |
| 5HJ3 | P_LYS_510 | NZ  | B_GLU_55   | OE2 | 3.553 |
| 5HJ3 | P_HIS_516 | NE2 | P_GLU_545  | OE1 | 2.882 |

|      |            |     |            |     |       |
|------|------------|-----|------------|-----|-------|
| 5HJ3 | P_ARG.559  | NH2 | O_GLU.103  | OE1 | 2.547 |
| 5HJ3 | P_ARG.559  | NH2 | O_GLU.103  | OE2 | 2.625 |
| 5HJ3 | P_HIS.602  | NE2 | L_GLU.611  | OE1 | 3.277 |
| 5HJ3 | A_ARG.33   | NH1 | A_GLU.95   | OE1 | 2.660 |
| 5HJ3 | A_ARG.33   | NH1 | A_GLU.95   | OE2 | 3.038 |
| 5HJ3 | A_ARG.38   | NH1 | A_GLU.46   | OE1 | 3.725 |
| 5HJ3 | A_ARG.38   | NH1 | A_GLU.46   | OE2 | 2.619 |
| 5HJ3 | A_ARG.38   | NH2 | A_ASP.86   | OD1 | 2.771 |
| 5HJ3 | A_ARG.66   | NH1 | A_ASP.86   | OD1 | 3.710 |
| 5HJ3 | A_ARG.66   | NH1 | A_ASP.86   | OD2 | 2.544 |
| 5HJ3 | A_ARG.66   | NH2 | A_ASP.86   | OD1 | 3.134 |
| 5HJ3 | A_ARG.66   | NH2 | A_ASP.86   | OD2 | 3.423 |
| 5HJ3 | A_ARG.94   | NH2 | A_ASP.101  | OD1 | 3.718 |
| 5HJ3 | A_ARG.94   | NH2 | A_ASP.101  | OD2 | 2.938 |
| 5HJ3 | A_ARG.98   | NH1 | A_ASP.100F | OD1 | 3.722 |
| 5HJ3 | A_ARG.98   | NH1 | A_ASP.100F | OD2 | 2.936 |
| 5HJ3 | A_LYS.145  | NZ  | A_ASP.146  | OD1 | 2.925 |
| 5HJ3 | A_LYS.145  | NZ  | A_ASP.146  | OD2 | 2.830 |
| 5HJ3 | A_LYS.221  | NZ  | B_GLU.123  | OE1 | 3.583 |
| 5HJ3 | A_LYS.221  | NZ  | B_GLU.123  | OE2 | 3.404 |
| 5HJ3 | B_ARG.61   | NH2 | B_ASP.82   | OD1 | 3.154 |
| 5HJ3 | B_ARG.142  | NH2 | B_GLU.105  | OE1 | 3.025 |
| 5HJ3 | B_LYS.188  | NZ  | B_ASP.185  | OD2 | 3.880 |
| 5HJ3 | B_HIS.189  | ND1 | B_ASP.151  | OD2 | 2.951 |
| 5JNX | A_LYS.38   | NZ  | A_ASP.37   | OD1 | 3.268 |
| 5JNX | A_LYS.84   | NZ  | A_GLU.61   | OE1 | 2.923 |
| 5JNX | A_LYS.84   | NZ  | A_GLU.61   | OE2 | 2.871 |
| 5JNX | A_LYS.142  | NZ  | A_GLU.127  | OE1 | 2.943 |
| 5JNX | A_LYS.171  | NZ  | A_GLU.164  | OE2 | 3.483 |
| 5JNX | A_ARG.389  | NH1 | A_GLU.393  | OE2 | 3.992 |
| 5JNX | A_LYS.392  | NZ  | A_ASP.396  | OD1 | 3.754 |
| 5JNX | A_ARG.404  | NH1 | A_GLU.606  | OE1 | 3.028 |
| 5JNX | A_ARG.404  | NH1 | A_GLU.606  | OE2 | 3.947 |
| 5JNX | A_ARG.404  | NH2 | A_GLU.584  | OE1 | 3.703 |
| 5JNX | A_HIS.441  | ND1 | A_ASP.496  | OD1 | 3.845 |
| 5JNX | A_HIS.441  | NE2 | A_ASP.496  | OD1 | 2.206 |
| 5JNX | A_HIS.441  | NE2 | A_ASP.496  | OD2 | 3.645 |
| 5JNX | A_HIS.492  | NE2 | A_ASP.445  | OD1 | 3.105 |
| 5JNX | A_HIS.510  | ND1 | A_ASP.508  | OD2 | 3.286 |
| 5JNX | A_HIS.512  | ND1 | A_ASP.525  | OD2 | 2.862 |
| 5JNX | A_ARG.579  | NH2 | A_ASP.466  | OD2 | 3.380 |
| 5JNX | A_ARG.607  | NH1 | A_ASP.611  | OD2 | 3.972 |
| 5JNX | A_ARG.1059 | NH2 | A_GLU.391  | OE1 | 2.950 |
| 5JNX | A_ARG.1059 | NH2 | A_GLU.391  | OE2 | 3.638 |
| 5JNX | A_ARG.1059 | NH2 | A_GLU.1089 | OE1 | 3.854 |
| 5JNX | A_ARG.1059 | NH2 | A_GLU.1089 | OE2 | 3.604 |
| 5JNX | A_HIS.1170 | ND1 | A_GLU.1166 | OE1 | 3.445 |
| 5JNX | A_HIS.1170 | NE2 | A_GLU.688  | OE2 | 2.924 |
| 5JNX | C_HIS.39   | NE2 | C_ASP.55   | OD1 | 3.998 |
| 5JNX | C_ARG.64   | NH1 | C_GLU.100  | OE1 | 3.273 |
| 5JNX | C_ARG.64   | NH1 | C_GLU.100  | OE2 | 3.875 |
| 5JNX | C_ARG.85   | NH2 | C_GLU.178  | OE1 | 2.663 |
| 5JNX | C_ARG.85   | NH2 | C_GLU.178  | OE2 | 3.814 |
| 5JNX | C_ARG.130  | NH2 | C_ASP.163  | OD2 | 3.179 |
| 5JNX | C_ARG.134  | NH1 | D_GLU.545  | OE2 | 3.659 |
| 5JNX | C_HIS.154  | NE2 | C_GLU.178  | OE2 | 2.610 |
| 5JNX | C_ARG.164  | NH2 | C_ASP.163  | OD1 | 3.605 |
| 5JNX | C_ARG.164  | NH2 | C_ASP.163  | OD2 | 3.318 |

|      |           |     |           |     |       |
|------|-----------|-----|-----------|-----|-------|
| 5JNX | D_HIS.516 | NE2 | D_GLU.545 | OE1 | 3.961 |
| 5JNX | D_ARG.559 | NH1 | C_GLU.103 | OE1 | 3.220 |
| 5JNX | D_ARG.559 | NH1 | C_GLU.103 | OE2 | 3.450 |
| 5JNX | D_ARG.559 | NH2 | C_GLU.103 | OE1 | 3.927 |
| 5JNX | D_ARG.559 | NH2 | C_GLU.103 | OE2 | 2.697 |
| 5JNX | D_LYS.588 | NZ  | C_ASP.47  | OD1 | 3.551 |
| 5JNX | D_LYS.588 | NZ  | C_ASP.47  | OD2 | 3.521 |
| 5JNX | E_HIS.39  | NE2 | E_ASP.55  | OD1 | 3.998 |
| 5JNX | E_ARG.64  | NH1 | E_GLU.100 | OE1 | 3.272 |
| 5JNX | E_ARG.64  | NH1 | E_GLU.100 | OE2 | 3.876 |
| 5JNX | E_ARG.85  | NH2 | E_GLU.178 | OE1 | 2.403 |
| 5JNX | E_ARG.85  | NH2 | E_GLU.178 | OE2 | 3.424 |
| 5JNX | E_ARG.130 | NH2 | E_ASP.163 | OD2 | 3.179 |
| 5JNX | E_ARG.134 | NH1 | F_GLU.545 | OE2 | 3.660 |
| 5JNX | E_HIS.154 | NE2 | E_GLU.178 | OE2 | 2.610 |
| 5JNX | E_LYS.155 | NZ  | A_ASP.502 | OD2 | 3.701 |
| 5JNX | E_ARG.164 | NH2 | E_ASP.163 | OD1 | 3.605 |
| 5JNX | E_ARG.164 | NH2 | E_ASP.163 | OD2 | 3.317 |
| 5JNX | F_HIS.516 | NE2 | F_GLU.545 | OE1 | 3.961 |
| 5JNX | F_ARG.559 | NH1 | E_GLU.103 | OE1 | 3.219 |
| 5JNX | F_ARG.559 | NH1 | E_GLU.103 | OE2 | 3.448 |
| 5JNX | F_ARG.559 | NH2 | E_GLU.103 | OE1 | 3.927 |
| 5JNX | F_ARG.559 | NH2 | E_GLU.103 | OE2 | 2.697 |
| 5JNX | F_LYS.588 | NZ  | E_ASP.47  | OD1 | 3.552 |
| 5JNX | F_LYS.588 | NZ  | E_ASP.47  | OD2 | 3.520 |
| 5JNX | G_HIS.39  | NE2 | G_ASP.55  | OD1 | 3.998 |
| 5JNX | G_ARG.64  | NH1 | G_GLU.100 | OE1 | 3.273 |
| 5JNX | G_ARG.64  | NH1 | G_GLU.100 | OE2 | 3.876 |
| 5JNX | G_ARG.85  | NH2 | G_GLU.178 | OE1 | 2.663 |
| 5JNX | G_ARG.85  | NH2 | G_GLU.178 | OE2 | 3.813 |
| 5JNX | G_ARG.130 | NH2 | G_ASP.163 | OD2 | 3.180 |
| 5JNX | G_ARG.134 | NH1 | H_GLU.545 | OE2 | 3.659 |
| 5JNX | G_HIS.154 | NE2 | G_GLU.178 | OE2 | 2.610 |
| 5JNX | G_ARG.164 | NH2 | G_ASP.163 | OD1 | 3.606 |
| 5JNX | G_ARG.164 | NH2 | G_ASP.163 | OD2 | 3.318 |
| 5JNX | H_HIS.516 | NE2 | H_GLU.545 | OE1 | 3.961 |
| 5JNX | H_ARG.559 | NH1 | G_GLU.103 | OE1 | 3.221 |
| 5JNX | H_ARG.559 | NH1 | G_GLU.103 | OE2 | 3.449 |
| 5JNX | H_ARG.559 | NH2 | G_GLU.103 | OE1 | 3.928 |
| 5JNX | H_ARG.559 | NH2 | G_GLU.103 | OE2 | 2.697 |
| 5JNX | H_LYS.588 | NZ  | G_ASP.47  | OD1 | 3.552 |
| 5JNX | H_LYS.588 | NZ  | G_ASP.47  | OD2 | 3.522 |
| 5JQ3 | A_HIS.39  | NE2 | A_ASP.55  | OD1 | 2.911 |
| 5JQ3 | A_HIS.39  | NE2 | A_ASP.55  | OD2 | 3.472 |
| 5JQ3 | A_ARG.85  | NH1 | A_GLU.178 | OE1 | 3.536 |
| 5JQ3 | A_ARG.85  | NH1 | A_GLU.178 | OE2 | 2.746 |
| 5JQ3 | A_LYS.114 | NZ  | A_GLU.120 | OE1 | 3.849 |
| 5JQ3 | A_LYS.114 | NZ  | A_GLU.120 | OE2 | 3.453 |
| 5JQ3 | A_ARG.130 | NH2 | A_ASP.163 | OD1 | 3.021 |
| 5JQ3 | A_HIS.154 | NE2 | A_GLU.178 | OE1 | 2.776 |
| 5JQ3 | A_ARG.164 | NH1 | A_ASP.163 | OD1 | 3.056 |
| 5JQ3 | A_ARG.164 | NH1 | A_ASP.163 | OD2 | 3.532 |
| 5JQ3 | A_ARG.266 | NH2 | A_ASP.237 | OD2 | 3.203 |
| 5JQ3 | B_HIS.516 | NE2 | B_GLU.545 | OE1 | 2.971 |
| 5JQ3 | B_ARG.559 | NH1 | A_GLU.103 | OE1 | 2.754 |
| 5JQ3 | B_ARG.559 | NH1 | A_GLU.103 | OE2 | 3.830 |
| 5JQ3 | B_ARG.559 | NH2 | A_GLU.103 | OE1 | 3.362 |
| 5JQ3 | B_ARG.559 | NH2 | A_GLU.103 | OE2 | 2.945 |

|      |           |     |           |     |       |
|------|-----------|-----|-----------|-----|-------|
| 5JQ7 | A_HIS_39  | NE2 | A_ASP_55  | OD1 | 3.302 |
| 5JQ7 | A_HIS_39  | NE2 | A_ASP_55  | OD2 | 2.805 |
| 5JQ7 | A_ARG_85  | NH1 | A_GLU_178 | OE1 | 3.344 |
| 5JQ7 | A_ARG_85  | NH1 | A_GLU_178 | OE2 | 2.714 |
| 5JQ7 | A_LYS_114 | NZ  | A_GLU_120 | OE2 | 3.552 |
| 5JQ7 | A_ARG_130 | NH2 | A_ASP_163 | OD1 | 2.926 |
| 5JQ7 | A_HIS_154 | NE2 | A_GLU_178 | OE1 | 2.770 |
| 5JQ7 | A_ARG_164 | NH1 | A_ASP_163 | OD1 | 2.933 |
| 5JQ7 | A_ARG_164 | NH1 | A_ASP_163 | OD2 | 3.613 |
| 5JQ7 | A_ARG_247 | NH1 | A_GLU_245 | OE1 | 3.700 |
| 5JQ7 | A_ARG_247 | NH1 | A_GLU_245 | OE2 | 3.859 |
| 5JQ7 | A_ARG_266 | NH2 | A_ASP_237 | OD2 | 3.168 |
| 5JQ7 | B_LYS_510 | NZ  | A_GLU_292 | OE1 | 3.131 |
| 5JQ7 | B_HIS_516 | NE2 | B_GLU_545 | OE1 | 2.658 |
| 5JQ7 | B_ARG_559 | NH1 | A_GLU_103 | OE1 | 2.800 |
| 5JQ7 | B_ARG_559 | NH1 | A_GLU_103 | OE2 | 3.720 |
| 5JQ7 | B_ARG_559 | NH2 | A_GLU_103 | OE1 | 3.375 |
| 5JQ7 | B_ARG_559 | NH2 | A_GLU_103 | OE2 | 2.748 |
| 5JQ7 | B_HIS_613 | NE2 | B_ASP_614 | OD1 | 3.865 |
| 5JQB | A_ARG_85  | NH1 | A_GLU_178 | OE1 | 3.533 |
| 5JQB | A_ARG_85  | NH1 | A_GLU_178 | OE2 | 2.805 |
| 5JQB | A_LYS_114 | NZ  | A_GLU_120 | OE2 | 3.275 |
| 5JQB | A_ARG_130 | NH2 | A_ASP_163 | OD1 | 3.034 |
| 5JQB | A_HIS_154 | NE2 | A_GLU_178 | OE1 | 2.801 |
| 5JQB | A_ARG_164 | NH1 | A_ASP_163 | OD1 | 2.868 |
| 5JQB | A_ARG_164 | NH1 | A_ASP_163 | OD2 | 3.537 |
| 5JQB | A_ARG_247 | NH1 | A_GLU_245 | OE1 | 3.146 |
| 5JQB | A_ARG_266 | NH2 | A_ASP_237 | OD2 | 3.033 |
| 5JQB | B_LYS_510 | NZ  | A_GLU_292 | OE1 | 2.746 |
| 5JQB | B_LYS_510 | NZ  | A_GLU_292 | OE2 | 3.918 |
| 5JQB | B_HIS_516 | NE2 | B_GLU_545 | OE1 | 2.749 |
| 5JQB | B_ARG_559 | NH1 | A_GLU_103 | OE1 | 2.703 |
| 5JQB | B_ARG_559 | NH1 | A_GLU_103 | OE2 | 3.788 |
| 5JQB | B_ARG_559 | NH2 | A_GLU_103 | OE1 | 3.188 |
| 5JQB | B_ARG_559 | NH2 | A_GLU_103 | OE2 | 2.857 |
| 5JQB | B_LYS_588 | NZ  | A_ASP_47  | OD1 | 3.558 |
| 5JQB | B_LYS_588 | NZ  | A_ASP_47  | OD2 | 3.148 |
| 5JQB | B_LYS_617 | NZ  | B_ASP_614 | OD1 | 3.955 |
| 5KEL | A_ARG_85  | NH2 | A_GLU_178 | OE1 | 2.875 |
| 5KEL | A_ARG_85  | NH2 | A_GLU_178 | OE2 | 3.676 |
| 5KEL | A_LYS_114 | NZ  | A_GLU_120 | OE2 | 2.853 |
| 5KEL | A_ARG_130 | NH1 | B_GLU_540 | OE2 | 3.053 |
| 5KEL | A_ARG_130 | NH2 | A_ASP_163 | OD1 | 3.103 |
| 5KEL | A_ARG_164 | NH2 | A_GLU_100 | OE1 | 3.728 |
| 5KEL | A_ARG_164 | NH2 | A_GLU_100 | OE2 | 2.804 |
| 5KEL | A_ARG_172 | NH1 | A_GLU_120 | OE1 | 2.760 |
| 5KEL | A_ARG_172 | NH2 | A_GLU_112 | OE1 | 3.171 |
| 5KEL | A_ARG_172 | NH2 | A_GLU_120 | OE1 | 2.755 |
| 5KEL | A_ARG_219 | NH1 | A_GLU_235 | OE2 | 2.800 |
| 5KEL | A_ARG_219 | NH2 | A_GLU_235 | OE2 | 3.004 |
| 5KEL | A_ARG_247 | NH1 | A_GLU_245 | OE2 | 3.112 |
| 5KEL | A_ARG_247 | NH2 | A_GLU_245 | OE2 | 3.134 |
| 5KEL | A_LYS_272 | NZ  | C_ASP_54  | OD2 | 3.464 |
| 5KEL | A_LYS_272 | NZ  | C_ASP_56  | OD2 | 2.595 |
| 5KEL | A_ARG_299 | NH2 | A_GLU_304 | OE1 | 3.032 |
| 5KEL | A_ARG_299 | NH2 | A_GLU_304 | OE2 | 3.954 |
| 5KEL | A_ARG_302 | NH1 | A_GLU_304 | OE2 | 3.084 |
| 5KEL | A_ARG_302 | NH2 | A_GLU_258 | OE2 | 2.817 |

|      |           |     |           |     |       |
|------|-----------|-----|-----------|-----|-------|
| 5KEL | B_HIS_516 | NE2 | B_GLU_545 | OE1 | 2.855 |
| 5KEL | B_ARG_559 | NH1 | A_GLU_103 | OE2 | 3.831 |
| 5KEL | B_ARG_559 | NH2 | A_GLU_103 | OE1 | 3.279 |
| 5KEL | B_ARG_559 | NH2 | A_GLU_103 | OE2 | 3.801 |
| 5KEL | B_ARG_596 | NH2 | B_ASP_607 | OD1 | 3.037 |
| 5KEL | H_ARG_38  | NH1 | H_ASP_86  | OD1 | 3.058 |
| 5KEL | H_ARG_38  | NH2 | H_GLU_46  | OE2 | 2.878 |
| 5KEL | H_ARG_52  | NH1 | H_GLU_50  | OE2 | 3.140 |
| 5KEL | H_LYS_64  | NZ  | H_GLU_61  | OE1 | 3.895 |
| 5KEL | H_LYS_64  | NZ  | H_GLU_61  | OE2 | 2.690 |
| 5KEL | H_ARG_66  | NH1 | H_ASP_86  | OD1 | 3.110 |
| 5KEL | H_ARG_66  | NH1 | H_ASP_86  | OD2 | 3.688 |
| 5KEL | H_ARG_66  | NH2 | H_ASP_86  | OD1 | 3.615 |
| 5KEL | H_ARG_66  | NH2 | H_ASP_86  | OD2 | 2.807 |
| 5KEL | H_ARG_71  | NH2 | H_ASP_73  | OD1 | 2.936 |
| 5KEL | H_ARG_71  | NH2 | H_ASP_73  | OD2 | 3.775 |
| 5KEL | H_ARG_83  | NH1 | H_GLU_85  | OE1 | 3.189 |
| 5KEL | H_ARG_83  | NH2 | H_GLU_85  | OE1 | 3.016 |
| 5KEL | L_ARG_61  | NH1 | L_ASP_82  | OD2 | 2.735 |
| 5KEL | L_ARG_61  | NH2 | L_GLU_81  | OE2 | 3.025 |
| 5KEL | L_ARG_61  | NH2 | L_ASP_82  | OD1 | 3.676 |
| 5KEL | L_ARG_61  | NH2 | L_ASP_82  | OD2 | 2.981 |
| 5KEL | L_LYS_107 | NZ  | L_GLU_17  | OE1 | 2.902 |
| 5KEL | L_LYS_107 | NZ  | L_GLU_17  | OE2 | 3.185 |
| 5KEL | C_LYS_3   | NZ  | C_ASP_1   | OD1 | 2.754 |
| 5KEL | C_LYS_3   | NZ  | C_ASP_1   | OD2 | 3.442 |
| 5KEL | C_ARG_38  | NH1 | C_ASP_86  | OD1 | 3.057 |
| 5KEL | C_ARG_38  | NH2 | C_GLU_46  | OE1 | 3.665 |
| 5KEL | C_ARG_38  | NH2 | C_GLU_46  | OE2 | 3.228 |
| 5KEL | C_ARG_38  | NH2 | C_ASP_86  | OD1 | 3.984 |
| 5KEL | C_LYS_71  | NZ  | C_ASP_55  | OD1 | 2.808 |
| 5KEL | C_ARG_75  | NH2 | C_ASP_72  | OD2 | 2.896 |
| 5KEL | D_LYS_24  | NZ  | D_ASP_70  | OD1 | 2.745 |
| 5KEL | D_LYS_24  | NZ  | D_ASP_70  | OD2 | 3.810 |
| 5KEL | D_ARG_61  | NH1 | D_GLU_81  | OE2 | 3.962 |
| 5KEL | D_ARG_61  | NH2 | D_GLU_81  | OE2 | 2.780 |
| 5KEL | D_ARG_61  | NH2 | D_ASP_82  | OD1 | 2.856 |
| 5KEL | D_ARG_61  | NH2 | D_ASP_82  | OD2 | 3.346 |
| 5KEL | D_ARG_107 | NH1 | D_GLU_105 | OE2 | 2.791 |
| 5KEL | E_ARG_85  | NH2 | E_GLU_178 | OE1 | 2.875 |
| 5KEL | E_ARG_85  | NH2 | E_GLU_178 | OE2 | 3.677 |
| 5KEL | E_LYS_114 | NZ  | E_GLU_120 | OE2 | 2.853 |
| 5KEL | E_ARG_130 | NH1 | G_GLU_540 | OE2 | 3.054 |
| 5KEL | E_ARG_130 | NH2 | E_ASP_163 | OD1 | 3.104 |
| 5KEL | E_ARG_164 | NH2 | E_GLU_100 | OE1 | 3.728 |
| 5KEL | E_ARG_164 | NH2 | E_GLU_100 | OE2 | 2.804 |
| 5KEL | E_ARG_172 | NH1 | E_GLU_120 | OE1 | 2.760 |
| 5KEL | E_ARG_172 | NH2 | E_GLU_112 | OE1 | 3.171 |
| 5KEL | E_ARG_172 | NH2 | E_GLU_120 | OE1 | 2.755 |
| 5KEL | E_ARG_219 | NH1 | E_GLU_235 | OE2 | 2.800 |
| 5KEL | E_ARG_219 | NH2 | E_GLU_235 | OE2 | 3.003 |
| 5KEL | E_ARG_247 | NH1 | E_GLU_245 | OE2 | 3.112 |
| 5KEL | E_ARG_247 | NH2 | E_GLU_245 | OE2 | 3.134 |
| 5KEL | E_LYS_272 | NZ  | J_ASP_54  | OD2 | 3.464 |
| 5KEL | E_LYS_272 | NZ  | J_ASP_56  | OD2 | 2.596 |
| 5KEL | E_ARG_299 | NH2 | E_GLU_304 | OE1 | 3.031 |
| 5KEL | E_ARG_299 | NH2 | E_GLU_304 | OE2 | 3.954 |
| 5KEL | E_ARG_302 | NH1 | E_GLU_304 | OE2 | 3.085 |

|      |           |     |           |     |       |
|------|-----------|-----|-----------|-----|-------|
| 5KEL | E_ARG_302 | NH2 | E_GLU_258 | OE2 | 2.816 |
| 5KEL | G_HIS_516 | NE2 | G_GLU_545 | OE1 | 2.855 |
| 5KEL | G_ARG_559 | NH1 | E_GLU_103 | OE2 | 3.832 |
| 5KEL | G_ARG_559 | NH2 | E_GLU_103 | OE1 | 3.279 |
| 5KEL | G_ARG_559 | NH2 | E_GLU_103 | OE2 | 3.802 |
| 5KEL | G_ARG_596 | NH2 | G_ASP_607 | OD1 | 3.038 |
| 5KEL | P_ARG_38  | NH1 | P_ASP_86  | OD1 | 3.058 |
| 5KEL | P_ARG_38  | NH2 | P_GLU_46  | OE2 | 2.878 |
| 5KEL | P_ARG_52  | NH1 | P_GLU_50  | OE2 | 3.140 |
| 5KEL | P_LYS_64  | NZ  | P_GLU_61  | OE1 | 3.894 |
| 5KEL | P_LYS_64  | NZ  | P_GLU_61  | OE2 | 2.690 |
| 5KEL | P_ARG_66  | NH1 | P_ASP_86  | OD1 | 3.110 |
| 5KEL | P_ARG_66  | NH1 | P_ASP_86  | OD2 | 3.688 |
| 5KEL | P_ARG_66  | NH2 | P_ASP_86  | OD1 | 3.615 |
| 5KEL | P_ARG_66  | NH2 | P_ASP_86  | OD2 | 2.807 |
| 5KEL | P_ARG_71  | NH2 | P_ASP_73  | OD1 | 2.936 |
| 5KEL | P_ARG_71  | NH2 | P_ASP_73  | OD2 | 3.775 |
| 5KEL | P_ARG_83  | NH1 | P_GLU_85  | OE1 | 3.188 |
| 5KEL | P_ARG_83  | NH2 | P_GLU_85  | OE1 | 3.017 |
| 5KEL | T_ARG_61  | NH1 | T_ASP_82  | OD2 | 2.735 |
| 5KEL | T_ARG_61  | NH2 | T_GLU_81  | OE2 | 3.025 |
| 5KEL | T_ARG_61  | NH2 | T_ASP_82  | OD1 | 3.676 |
| 5KEL | T_ARG_61  | NH2 | T_ASP_82  | OD2 | 2.981 |
| 5KEL | T_LYS_107 | NZ  | T_GLU_17  | OE1 | 2.903 |
| 5KEL | T_LYS_107 | NZ  | T_GLU_17  | OE2 | 3.186 |
| 5KEL | J_LYS_3   | NZ  | J_ASP_1   | OD1 | 2.754 |
| 5KEL | J_LYS_3   | NZ  | J_ASP_1   | OD2 | 3.442 |
| 5KEL | J_ARG_38  | NH1 | J_ASP_86  | OD1 | 3.057 |
| 5KEL | J_ARG_38  | NH2 | J_GLU_46  | OE1 | 3.665 |
| 5KEL | J_ARG_38  | NH2 | J_GLU_46  | OE2 | 3.228 |
| 5KEL | J_ARG_38  | NH2 | J_ASP_86  | OD1 | 3.983 |
| 5KEL | J_LYS_71  | NZ  | J_ASP_55  | OD1 | 2.808 |
| 5KEL | J_ARG_75  | NH2 | J_ASP_72  | OD2 | 2.896 |
| 5KEL | N_LYS_24  | NZ  | N_ASP_70  | OD1 | 2.744 |
| 5KEL | N_LYS_24  | NZ  | N_ASP_70  | OD2 | 3.810 |
| 5KEL | N_ARG_61  | NH1 | N_GLU_81  | OE2 | 3.962 |
| 5KEL | N_ARG_61  | NH2 | N_GLU_81  | OE2 | 2.781 |
| 5KEL | N_ARG_61  | NH2 | N_ASP_82  | OD1 | 2.855 |
| 5KEL | N_ARG_61  | NH2 | N_ASP_82  | OD2 | 3.346 |
| 5KEL | N_ARG_107 | NH1 | N_GLU_105 | OE2 | 2.791 |
| 5KEL | F_ARG_85  | NH2 | F_GLU_178 | OE1 | 2.875 |
| 5KEL | F_ARG_85  | NH2 | F_GLU_178 | OE2 | 3.677 |
| 5KEL | F_LYS_114 | NZ  | F_GLU_120 | OE2 | 2.853 |
| 5KEL | F_ARG_130 | NH1 | I_GLU_540 | OE2 | 3.053 |
| 5KEL | F_ARG_130 | NH2 | F_ASP_163 | OD1 | 3.103 |
| 5KEL | F_ARG_164 | NH2 | F_GLU_100 | OE1 | 3.728 |
| 5KEL | F_ARG_164 | NH2 | F_GLU_100 | OE2 | 2.804 |
| 5KEL | F_ARG_172 | NH1 | F_GLU_120 | OE1 | 2.760 |
| 5KEL | F_ARG_172 | NH2 | F_GLU_112 | OE1 | 3.170 |
| 5KEL | F_ARG_172 | NH2 | F_GLU_120 | OE1 | 2.755 |
| 5KEL | F_ARG_219 | NH1 | F_GLU_235 | OE2 | 2.799 |
| 5KEL | F_ARG_219 | NH2 | F_GLU_235 | OE2 | 3.003 |
| 5KEL | F_ARG_247 | NH1 | F_GLU_245 | OE2 | 3.112 |
| 5KEL | F_ARG_247 | NH2 | F_GLU_245 | OE2 | 3.134 |
| 5KEL | F_LYS_272 | NZ  | M_ASP_54  | OD2 | 3.463 |
| 5KEL | F_LYS_272 | NZ  | M_ASP_56  | OD2 | 2.596 |
| 5KEL | F_ARG_299 | NH2 | F_GLU_304 | OE1 | 3.032 |
| 5KEL | F_ARG_299 | NH2 | F_GLU_304 | OE2 | 3.954 |

|      |           |     |           |     |       |
|------|-----------|-----|-----------|-----|-------|
| 5KEL | F_ARG_302 | NH1 | F_GLU_304 | OE2 | 3.084 |
| 5KEL | F_ARG_302 | NH2 | F_GLU_258 | OE2 | 2.816 |
| 5KEL | I_HIS_516 | NE2 | I_GLU_545 | OE1 | 2.855 |
| 5KEL | I_ARG_559 | NH1 | F_GLU_103 | OE2 | 3.831 |
| 5KEL | I_ARG_559 | NH2 | F_GLU_103 | OE1 | 3.279 |
| 5KEL | I_ARG_559 | NH2 | F_GLU_103 | OE2 | 3.801 |
| 5KEL | I_ARG_596 | NH2 | I_ASP_607 | OD1 | 3.037 |
| 5KEL | Q_ARG_38  | NH1 | Q_ASP_86  | OD1 | 3.058 |
| 5KEL | Q_ARG_38  | NH2 | Q_GLU_46  | OE2 | 2.878 |
| 5KEL | Q_ARG_52  | NH1 | Q_GLU_50  | OE2 | 3.140 |
| 5KEL | Q_LYS_64  | NZ  | Q_GLU_61  | OE1 | 3.895 |
| 5KEL | Q_LYS_64  | NZ  | Q_GLU_61  | OE2 | 2.690 |
| 5KEL | Q_ARG_66  | NH1 | Q_ASP_86  | OD1 | 3.110 |
| 5KEL | Q_ARG_66  | NH1 | Q_ASP_86  | OD2 | 3.688 |
| 5KEL | Q_ARG_66  | NH2 | Q_ASP_86  | OD1 | 3.615 |
| 5KEL | Q_ARG_66  | NH2 | Q_ASP_86  | OD2 | 2.807 |
| 5KEL | Q_ARG_71  | NH2 | Q_ASP_73  | OD1 | 2.936 |
| 5KEL | Q_ARG_71  | NH2 | Q_ASP_73  | OD2 | 3.774 |
| 5KEL | Q_ARG_83  | NH1 | Q_GLU_85  | OE1 | 3.189 |
| 5KEL | Q_ARG_83  | NH2 | Q_GLU_85  | OE1 | 3.016 |
| 5KEL | U_ARG_61  | NH1 | U_ASP_82  | OD2 | 2.734 |
| 5KEL | U_ARG_61  | NH2 | U_GLU_81  | OE2 | 3.025 |
| 5KEL | U_ARG_61  | NH2 | U_ASP_82  | OD1 | 3.676 |
| 5KEL | U_ARG_61  | NH2 | U_ASP_82  | OD2 | 2.981 |
| 5KEL | U_LYS_107 | NZ  | U_GLU_17  | OE1 | 2.903 |
| 5KEL | U_LYS_107 | NZ  | U_GLU_17  | OE2 | 3.186 |
| 5KEL | M_LYS_3   | NZ  | M_ASP_1   | OD1 | 2.754 |
| 5KEL | M_LYS_3   | NZ  | M_ASP_1   | OD2 | 3.442 |
| 5KEL | M_ARG_38  | NH1 | M_ASP_86  | OD1 | 3.057 |
| 5KEL | M_ARG_38  | NH2 | M_GLU_46  | OE1 | 3.665 |
| 5KEL | M_ARG_38  | NH2 | M_GLU_46  | OE2 | 3.228 |
| 5KEL | M_ARG_38  | NH2 | M_ASP_86  | OD1 | 3.984 |
| 5KEL | M_LYS_71  | NZ  | M_ASP_55  | OD1 | 2.808 |
| 5KEL | M_ARG_75  | NH2 | M_ASP_72  | OD2 | 2.896 |
| 5KEL | O_LYS_24  | NZ  | O_ASP_70  | OD1 | 2.745 |
| 5KEL | O_LYS_24  | NZ  | O_ASP_70  | OD2 | 3.811 |
| 5KEL | O_ARG_61  | NH1 | O_GLU_81  | OE2 | 3.961 |
| 5KEL | O_ARG_61  | NH2 | O_GLU_81  | OE2 | 2.780 |
| 5KEL | O_ARG_61  | NH2 | O_ASP_82  | OD1 | 2.855 |
| 5KEL | O_ARG_61  | NH2 | O_ASP_82  | OD2 | 3.346 |
| 5KEL | O_ARG_107 | NH1 | O_GLU_105 | OE2 | 2.791 |
| 5KEM | C_ARG_24  | NH1 | C_GLU_70  | OE1 | 3.169 |
| 5KEM | C_ARG_24  | NH2 | C_GLU_70  | OE1 | 2.965 |
| 5KEM | C_ARG_61  | NH1 | C_ASP_82  | OD1 | 3.729 |
| 5KEM | C_ARG_61  | NH1 | C_ASP_82  | OD2 | 2.658 |
| 5KEM | C_ARG_61  | NH2 | C_GLU_81  | OE2 | 3.360 |
| 5KEM | C_ARG_61  | NH2 | C_ASP_82  | OD1 | 3.084 |
| 5KEM | C_ARG_61  | NH2 | C_ASP_82  | OD2 | 3.287 |
| 5KEM | C_ARG_103 | NH1 | C_GLU_105 | OE1 | 2.773 |
| 5KEM | C_ARG_103 | NH2 | C_GLU_105 | OE1 | 2.948 |
| 5KEM | B_LYS_12  | NZ  | B_GLU_10  | OE1 | 3.650 |
| 5KEM | B_LYS_12  | NZ  | B_GLU_10  | OE2 | 2.758 |
| 5KEM | B_LYS_19  | NZ  | B_ASP_81  | OD2 | 2.772 |
| 5KEM | B_ARG_38  | NH1 | B_GLU_46  | OE1 | 2.905 |
| 5KEM | B_ARG_38  | NH1 | B_ASP_86  | OD1 | 3.520 |
| 5KEM | B_ARG_38  | NH1 | B_ASP_86  | OD2 | 3.245 |
| 5KEM | B_ARG_38  | NH2 | B_ASP_86  | OD1 | 2.958 |
| 5KEM | B_ARG_38  | NH2 | B_ASP_86  | OD2 | 3.504 |

|      |           |     |           |     |       |
|------|-----------|-----|-----------|-----|-------|
| 5KEM | B_LYS_53  | NZ  | B_ASP_31  | OD1 | 2.921 |
| 5KEM | B_ARG_64  | NH1 | B_GLU_46  | OE1 | 3.725 |
| 5KEM | B_ARG_64  | NH1 | B_GLU_46  | OE2 | 2.926 |
| 5KEM | B_ARG_64  | NH2 | B_GLU_46  | OE1 | 3.105 |
| 5KEM | B_ARG_64  | NH2 | B_GLU_46  | OE2 | 3.585 |
| 5KEM | B_LYS_83  | NZ  | B_ASP_85  | OD1 | 3.656 |
| 5KEM | B_LYS_83  | NZ  | B_ASP_85  | OD2 | 2.787 |
| 5KEM | D_LYS_3   | NZ  | D_ASP_1   | OD2 | 2.842 |
| 5KEM | D_LYS_43  | NZ  | D_GLU_46  | OE2 | 2.896 |
| 5KEM | D_LYS_57  | NZ  | D_ASP_55  | OD1 | 3.976 |
| 5KEM | D_LYS_57  | NZ  | D_ASP_55  | OD2 | 2.638 |
| 5KEM | D_LYS_71  | NZ  | D_ASP_56  | OD1 | 2.855 |
| 5KEM | D_LYS_71  | NZ  | D_ASP_56  | OD2 | 3.526 |
| 5KEM | D_ARG_75  | NH2 | D_ASP_72  | OD2 | 2.852 |
| 5KEM | D_ARG_94  | NH1 | D_ASP_96  | OD1 | 3.169 |
| 5KEM | D_ARG_94  | NH2 | D_ASP_96  | OD1 | 3.069 |
| 5KEM | E_LYS_24  | NZ  | E_ASP_70  | OD1 | 3.824 |
| 5KEM | E_ARG_54  | NH1 | E_ASP_60  | OD1 | 2.684 |
| 5KEM | E_ARG_54  | NH2 | E_ASP_60  | OD1 | 2.959 |
| 5KEM | E_ARG_61  | NH1 | E_ASP_82  | OD2 | 3.854 |
| 5KEM | E_ARG_107 | NH1 | E_GLU_105 | OE1 | 2.926 |
| 5KEM | E_ARG_107 | NH1 | E_GLU_105 | OE2 | 3.400 |
| 5KEM | A_ARG_85  | NH1 | A_GLU_178 | OE1 | 2.986 |
| 5KEM | A_ARG_85  | NH1 | A_GLU_178 | OE2 | 3.588 |
| 5KEM | A_ARG_85  | NH2 | A_GLU_178 | OE1 | 3.598 |
| 5KEM | A_ARG_85  | NH2 | A_GLU_178 | OE2 | 2.771 |
| 5KEM | A_LYS_114 | NZ  | A_GLU_112 | OE2 | 2.902 |
| 5KEM | A_LYS_114 | NZ  | A_GLU_120 | OE1 | 2.734 |
| 5KEM | A_ARG_172 | NH2 | A_GLU_112 | OE1 | 2.757 |
| 5KEM | A_ARG_219 | NH1 | A_GLU_235 | OE1 | 3.033 |
| 5KEM | A_ARG_247 | NH1 | A_ASP_282 | OD2 | 3.763 |
| 5KEM | A_ARG_247 | NH2 | A_ASP_282 | OD2 | 3.187 |
| 5KEM | A_LYS_272 | NZ  | D_ASP_54  | OD1 | 2.876 |
| 5KEM | A_LYS_272 | NZ  | D_ASP_54  | OD2 | 3.185 |
| 5KEM | A_LYS_272 | NZ  | A_GLU_235 | OE2 | 2.870 |
| 5KEM | H_ARG_24  | NH1 | H_GLU_70  | OE1 | 3.169 |
| 5KEM | H_ARG_24  | NH2 | H_GLU_70  | OE1 | 2.966 |
| 5KEM | H_ARG_61  | NH1 | H_ASP_82  | OD1 | 3.730 |
| 5KEM | H_ARG_61  | NH1 | H_ASP_82  | OD2 | 2.658 |
| 5KEM | H_ARG_61  | NH2 | H_GLU_81  | OE2 | 3.360 |
| 5KEM | H_ARG_61  | NH2 | H_ASP_82  | OD1 | 3.084 |
| 5KEM | H_ARG_61  | NH2 | H_ASP_82  | OD2 | 3.287 |
| 5KEM | H_ARG_103 | NH1 | H_GLU_105 | OE1 | 2.774 |
| 5KEM | H_ARG_103 | NH2 | H_GLU_105 | OE1 | 2.948 |
| 5KEM | G_LYS_12  | NZ  | G_GLU_10  | OE1 | 3.649 |
| 5KEM | G_LYS_12  | NZ  | G_GLU_10  | OE2 | 2.758 |
| 5KEM | G_LYS_19  | NZ  | G_ASP_81  | OD2 | 2.772 |
| 5KEM | G_ARG_38  | NH1 | G_GLU_46  | OE1 | 2.905 |
| 5KEM | G_ARG_38  | NH1 | G_ASP_86  | OD1 | 3.521 |
| 5KEM | G_ARG_38  | NH1 | G_ASP_86  | OD2 | 3.246 |
| 5KEM | G_ARG_38  | NH2 | G_ASP_86  | OD1 | 2.960 |
| 5KEM | G_ARG_38  | NH2 | G_ASP_86  | OD2 | 3.505 |
| 5KEM | G_LYS_53  | NZ  | G_ASP_31  | OD1 | 2.921 |
| 5KEM | G_ARG_64  | NH1 | G_GLU_46  | OE1 | 3.725 |
| 5KEM | G_ARG_64  | NH1 | G_GLU_46  | OE2 | 2.925 |
| 5KEM | G_ARG_64  | NH2 | G_GLU_46  | OE1 | 3.106 |
| 5KEM | G_ARG_64  | NH2 | G_GLU_46  | OE2 | 3.585 |
| 5KEM | G_LYS_83  | NZ  | G_ASP_85  | OD1 | 3.656 |

|      |           |     |           |     |       |
|------|-----------|-----|-----------|-----|-------|
| 5KEM | G_LYS_83  | NZ  | G_ASP_85  | OD2 | 2.788 |
| 5KEM | LLYS_3    | NZ  | L_ASP_1   | OD2 | 2.842 |
| 5KEM | LLYS_43   | NZ  | L_GLU_46  | OE2 | 2.897 |
| 5KEM | LLYS_57   | NZ  | L_ASP_55  | OD1 | 3.976 |
| 5KEM | LLYS_57   | NZ  | L_ASP_55  | OD2 | 2.638 |
| 5KEM | LLYS_71   | NZ  | L_ASP_56  | OD1 | 2.856 |
| 5KEM | LLYS_71   | NZ  | L_ASP_56  | OD2 | 3.527 |
| 5KEM | L_ARG_75  | NH2 | L_ASP_72  | OD2 | 2.852 |
| 5KEM | L_ARG_94  | NH1 | L_ASP_96  | OD1 | 3.167 |
| 5KEM | L_ARG_94  | NH2 | L_ASP_96  | OD1 | 3.069 |
| 5KEM | J_LYS_24  | NZ  | J_ASP_70  | OD1 | 3.825 |
| 5KEM | J_ARG_54  | NH1 | J_ASP_60  | OD1 | 2.683 |
| 5KEM | J_ARG_54  | NH2 | J_ASP_60  | OD1 | 2.960 |
| 5KEM | J_ARG_61  | NH1 | J_ASP_82  | OD2 | 3.854 |
| 5KEM | J_ARG_107 | NH1 | J_GLU_105 | OE1 | 2.925 |
| 5KEM | J_ARG_107 | NH1 | J_GLU_105 | OE2 | 3.399 |
| 5KEM | F_ARG_85  | NH1 | F_GLU_178 | OE1 | 2.987 |
| 5KEM | F_ARG_85  | NH1 | F_GLU_178 | OE2 | 3.589 |
| 5KEM | F_ARG_85  | NH2 | F_GLU_178 | OE1 | 3.598 |
| 5KEM | F_ARG_85  | NH2 | F_GLU_178 | OE2 | 2.771 |
| 5KEM | F_LYS_114 | NZ  | F_GLU_112 | OE2 | 2.902 |
| 5KEM | F_LYS_114 | NZ  | F_GLU_120 | OE1 | 2.734 |
| 5KEM | F_ARG_172 | NH2 | F_GLU_112 | OE1 | 2.756 |
| 5KEM | F_ARG_219 | NH1 | F_GLU_235 | OE1 | 3.032 |
| 5KEM | F_ARG_247 | NH1 | F_ASP_282 | OD2 | 3.762 |
| 5KEM | F_ARG_247 | NH2 | F_ASP_282 | OD2 | 3.186 |
| 5KEM | F_LYS_272 | NZ  | L_ASP_54  | OD1 | 2.876 |
| 5KEM | F_LYS_272 | NZ  | L_ASP_54  | OD2 | 3.185 |
| 5KEM | F_LYS_272 | NZ  | F_GLU_235 | OE2 | 2.870 |
| 5KEN | A_ARG_54  | NH2 | A_ASP_55  | OD2 | 3.882 |
| 5KEN | A_ARG_85  | NH2 | A_GLU_178 | OE1 | 3.646 |
| 5KEN | A_ARG_85  | NH2 | A_GLU_178 | OE2 | 2.914 |
| 5KEN | A_ARG_130 | NH2 | A_ASP_163 | OD1 | 3.381 |
| 5KEN | A_ARG_134 | NH2 | B_GLU_545 | OE1 | 2.859 |
| 5KEN | A_ARG_136 | NH1 | A_GLU_106 | OE2 | 2.734 |
| 5KEN | A_LYS_140 | NZ  | A_GLU_112 | OE2 | 3.961 |
| 5KEN | A_HIS_154 | NE2 | A_GLU_178 | OE1 | 2.777 |
| 5KEN | A_ARG_164 | NH2 | A_GLU_100 | OE1 | 3.828 |
| 5KEN | A_ARG_164 | NH2 | A_GLU_100 | OE2 | 3.033 |
| 5KEN | A_ARG_172 | NH2 | A_GLU_112 | OE1 | 3.530 |
| 5KEN | B_LYS_510 | NZ  | D_GLU_56  | OE1 | 3.639 |
| 5KEN | B_LYS_510 | NZ  | D_GLU_56  | OE2 | 2.773 |
| 5KEN | B_HIS_549 | NE2 | C_ASP_52  | OD1 | 3.874 |
| 5KEN | B_ARG_559 | NH1 | A_GLU_103 | OE1 | 3.709 |
| 5KEN | B_ARG_559 | NH1 | A_GLU_103 | OE2 | 2.818 |
| 5KEN | B_ARG_559 | NH2 | A_GLU_103 | OE1 | 3.114 |
| 5KEN | B_ARG_559 | NH2 | A_GLU_103 | OE2 | 3.662 |
| 5KEN | B_ARG_596 | NH2 | B_ASP_607 | OD1 | 3.053 |
| 5KEN | C_LYS_38  | NZ  | C_GLU_46  | OE1 | 2.804 |
| 5KEN | C_LYS_38  | NZ  | C_GLU_46  | OE2 | 3.887 |
| 5KEN | D_ARG_61  | NH2 | D_GLU_81  | OE2 | 2.826 |
| 5KEN | D_ARG_61  | NH2 | D_ASP_82  | OD1 | 3.556 |
| 5KEN | D_ARG_61  | NH2 | D_ASP_82  | OD2 | 2.823 |
| 5KEN | D_LYS_107 | NZ  | D_GLU_17  | OE1 | 3.537 |
| 5KEN | D_LYS_107 | NZ  | D_GLU_17  | OE2 | 2.886 |
| 5KEN | E_HIS_39  | ND1 | E_ASP_55  | OD1 | 2.715 |
| 5KEN | E_HIS_39  | ND1 | E_ASP_55  | OD2 | 3.363 |
| 5KEN | E_ARG_85  | NH2 | E_GLU_178 | OE1 | 3.714 |

|      |           |     |           |     |       |
|------|-----------|-----|-----------|-----|-------|
| 5KEN | E_ARG_85  | NH2 | E_GLU_178 | OE2 | 3.034 |
| 5KEN | E_ARG_130 | NH1 | E_ASP_163 | OD1 | 2.771 |
| 5KEN | E_ARG_136 | NH1 | E_GLU_106 | OE2 | 2.733 |
| 5KEN | E_LYS_140 | NZ  | E_GLU_112 | OE2 | 2.756 |
| 5KEN | E_HIS_154 | NE2 | E_GLU_178 | OE1 | 2.772 |
| 5KEN | E_ARG_164 | NH2 | E_GLU_100 | OE1 | 3.488 |
| 5KEN | E_ARG_164 | NH2 | E_GLU_100 | OE2 | 3.760 |
| 5KEN | E_LYS_272 | NZ  | J_ASP_54  | OD2 | 3.722 |
| 5KEN | E_LYS_272 | NZ  | J_ASP_56  | OD1 | 3.736 |
| 5KEN | E_LYS_272 | NZ  | J_ASP_56  | OD2 | 2.765 |
| 5KEN | E_LYS_276 | NZ  | E_GLU_245 | OE1 | 3.431 |
| 5KEN | E_LYS_276 | NZ  | E_GLU_245 | OE2 | 2.793 |
| 5KEN | E_ARG_299 | NH1 | E_GLU_304 | OE1 | 2.918 |
| 5KEN | E_ARG_299 | NH1 | E_GLU_305 | OE2 | 3.083 |
| 5KEN | E_ARG_299 | NH2 | E_GLU_305 | OE2 | 2.937 |
| 5KEN | E_ARG_302 | NH1 | E_GLU_304 | OE2 | 2.810 |
| 5KEN | E_ARG_302 | NH2 | E_GLU_258 | OE2 | 2.806 |
| 5KEN | F_LYS_510 | NZ  | H_GLU_56  | OE2 | 2.720 |
| 5KEN | F_HIS_516 | NE2 | F_GLU_545 | OE1 | 2.865 |
| 5KEN | F_HIS_549 | NE2 | G_ASP_52  | OD1 | 3.491 |
| 5KEN | F_ARG_559 | NH1 | E_GLU_103 | OE1 | 3.868 |
| 5KEN | F_ARG_559 | NH1 | E_GLU_103 | OE2 | 2.947 |
| 5KEN | F_ARG_559 | NH2 | E_GLU_103 | OE1 | 3.043 |
| 5KEN | F_ARG_559 | NH2 | E_GLU_103 | OE2 | 3.542 |
| 5KEN | F_ARG_596 | NH2 | F_ASP_607 | OD1 | 2.978 |
| 5KEN | F_HIS_613 | ND1 | F_ASP_614 | OD2 | 3.831 |
| 5KEN | G_LYS_38  | NZ  | G_GLU_46  | OE1 | 2.811 |
| 5KEN | G_LYS_38  | NZ  | G_GLU_46  | OE2 | 3.954 |
| 5KEN | G_LYS_62  | NZ  | H_ASP_1   | OD2 | 2.735 |
| 5KEN | H_ARG_61  | NH2 | H_GLU_81  | OE2 | 2.864 |
| 5KEN | H_ARG_61  | NH2 | H_ASP_82  | OD1 | 3.570 |
| 5KEN | H_ARG_61  | NH2 | H_ASP_82  | OD2 | 2.811 |
| 5KEN | H_LYS_107 | NZ  | H_GLU_17  | OE1 | 3.562 |
| 5KEN | H_LYS_107 | NZ  | H_GLU_17  | OE2 | 2.967 |
| 5KEN | I_LYS_24  | NZ  | I_ASP_70  | OD1 | 2.714 |
| 5KEN | I_LYS_24  | NZ  | I_ASP_70  | OD2 | 3.786 |
| 5KEN | I_ARG_54  | NH1 | I_ASP_60  | OD1 | 3.072 |
| 5KEN | I_ARG_61  | NH1 | I_GLU_81  | OE2 | 3.750 |
| 5KEN | I_ARG_61  | NH2 | I_GLU_81  | OE2 | 2.708 |
| 5KEN | I_ARG_61  | NH2 | I_ASP_82  | OD1 | 2.808 |
| 5KEN | I_ARG_61  | NH2 | I_ASP_82  | OD2 | 3.337 |
| 5KEN | I_LYS_103 | NZ  | I_GLU_105 | OE2 | 2.881 |
| 5KEN | I_ARG_107 | NH2 | I_GLU_105 | OE1 | 2.726 |
| 5KEN | J_LYS_3   | NZ  | J_ASP_1   | OD1 | 2.794 |
| 5KEN | J_LYS_3   | NZ  | J_ASP_1   | OD2 | 3.424 |
| 5KEN | J_ARG_38  | NH1 | J_ASP_86  | OD1 | 3.024 |
| 5KEN | J_ARG_38  | NH2 | J_GLU_46  | OE1 | 3.864 |
| 5KEN | J_ARG_38  | NH2 | J_GLU_46  | OE2 | 3.398 |
| 5KEN | J_ARG_38  | NH2 | J_ASP_86  | OD1 | 3.399 |
| 5KEN | J_LYS_71  | NZ  | J_ASP_55  | OD1 | 2.827 |
| 5KEN | J_ARG_75  | NH2 | J_ASP_72  | OD2 | 2.956 |
| 5KEN | K_HIS_39  | ND1 | K_ASP_55  | OD1 | 2.793 |
| 5KEN | K_HIS_39  | ND1 | K_ASP_55  | OD2 | 3.278 |
| 5KEN | K_ARG_85  | NH2 | K_GLU_178 | OE1 | 3.673 |
| 5KEN | K_ARG_85  | NH2 | K_GLU_178 | OE2 | 3.020 |
| 5KEN | K_LYS_115 | NZ  | K_ASP_150 | OD1 | 3.600 |
| 5KEN | K_ARG_130 | NH2 | K_ASP_163 | OD1 | 3.177 |
| 5KEN | K_ARG_130 | NH2 | K_ASP_163 | OD2 | 3.766 |

|         |           |     |           |     |       |
|---------|-----------|-----|-----------|-----|-------|
| 5KEN    | K_ARG.136 | NH1 | K_GLU.106 | OE2 | 2.803 |
| 5KEN    | K_LYS.140 | NZ  | K_GLU.112 | OE2 | 2.762 |
| 5KEN    | K_HIS.154 | NE2 | K_GLU.178 | OE1 | 2.705 |
| 5KEN    | K_ARG.164 | NH2 | K_GLU.100 | OE1 | 3.437 |
| 5KEN    | K_ARG.164 | NH2 | K_GLU.100 | OE2 | 3.533 |
| 5KEN    | K_ARG.219 | NH1 | K_GLU.235 | OE2 | 2.859 |
| 5KEN    | K_ARG.219 | NH2 | K_GLU.235 | OE2 | 2.957 |
| 5KEN    | K_LYS.272 | NZ  | K_GLU.235 | OE1 | 3.796 |
| 5KEN    | K_LYS.272 | NZ  | Q_ASP.54  | OD2 | 3.814 |
| 5KEN    | K_LYS.272 | NZ  | Q_ASP.56  | OD1 | 3.710 |
| 5KEN    | K_LYS.272 | NZ  | Q_ASP.56  | OD2 | 2.769 |
| 5KEN    | K_ARG.299 | NH1 | K_GLU.304 | OE1 | 2.978 |
| 5KEN    | K_ARG.299 | NH1 | K_GLU.305 | OE2 | 3.152 |
| 5KEN    | K_ARG.299 | NH2 | K_GLU.305 | OE2 | 2.878 |
| 5KEN    | K_ARG.302 | NH1 | K_GLU.304 | OE2 | 2.982 |
| 5KEN    | K_ARG.302 | NH2 | K_GLU.258 | OE2 | 2.830 |
| 5KEN    | M_LYS.510 | NZ  | O_GLU.56  | OE2 | 2.667 |
| 5KEN    | M_HIS.516 | NE2 | M_GLU.545 | OE1 | 2.888 |
| 5KEN    | M_ARG.559 | NH1 | K_GLU.103 | OE1 | 3.708 |
| 5KEN    | M_ARG.559 | NH1 | K_GLU.103 | OE2 | 2.824 |
| 5KEN    | M_ARG.559 | NH2 | K_GLU.103 | OE1 | 3.090 |
| 5KEN    | M_ARG.559 | NH2 | K_GLU.103 | OE2 | 3.645 |
| 5KEN    | M_ARG.596 | NH2 | M_ASP.607 | OD1 | 2.995 |
| 5KEN    | N_LYS.38  | NZ  | N_ASP.86  | OD1 | 3.887 |
| 5KEN    | N_LYS.62  | NZ  | O_ASP.1   | OD2 | 2.793 |
| 5KEN    | O_ARG.61  | NH2 | O_GLU.81  | OE2 | 3.700 |
| 5KEN    | O_ARG.61  | NH2 | O_ASP.82  | OD1 | 3.662 |
| 5KEN    | O_ARG.61  | NH2 | O_ASP.82  | OD2 | 2.905 |
| 5KEN    | O_LYS.107 | NZ  | O_GLU.17  | OE1 | 3.531 |
| 5KEN    | O_LYS.107 | NZ  | O_GLU.17  | OE2 | 2.981 |
| 5KEN    | P_LYS.24  | NZ  | P_ASP.70  | OD1 | 2.736 |
| 5KEN    | P_LYS.24  | NZ  | P_ASP.70  | OD2 | 3.714 |
| 5KEN    | P_ARG.54  | NH1 | P_ASP.60  | OD1 | 2.965 |
| 5KEN    | P_ARG.61  | NH1 | P_GLU.81  | OE2 | 3.801 |
| 5KEN    | P_ARG.61  | NH2 | P_GLU.81  | OE2 | 2.727 |
| 5KEN    | P_ARG.61  | NH2 | P_ASP.82  | OD1 | 2.822 |
| 5KEN    | P_ARG.61  | NH2 | P_ASP.82  | OD2 | 3.338 |
| 5KEN    | P_ARG.107 | NH1 | P_GLU.105 | OE2 | 2.824 |
| 5KEN    | Q_LYS.3   | NZ  | Q_ASP.1   | OD1 | 2.773 |
| 5KEN    | Q_LYS.3   | NZ  | Q_ASP.1   | OD2 | 3.470 |
| 5KEN    | Q_ARG.38  | NH1 | Q_ASP.86  | OD1 | 3.016 |
| 5KEN    | Q_ARG.38  | NH2 | Q_GLU.46  | OE1 | 3.835 |
| 5KEN    | Q_ARG.38  | NH2 | Q_GLU.46  | OE2 | 3.412 |
| 5KEN    | Q_ARG.38  | NH2 | Q_ASP.86  | OD1 | 3.365 |
| 5KEN    | Q_LYS.71  | NZ  | Q_ASP.55  | OD1 | 2.819 |
| 5KEN    | Q_ARG.75  | NH2 | Q_ASP.72  | OD2 | 2.942 |
| 5T42-13 | A_LYS.633 | NZ  | A_ASP.642 | OD2 | 2.906 |
| 5T42-5  | A_LYS.633 | NZ  | A_ASP.642 | OD2 | 3.987 |
| 5T42-8  | A_LYS.633 | NZ  | A_ASP.642 | OD2 | 2.592 |
| 6DZL    | A_ARG.85  | NH2 | A_GLU.178 | OE1 | 3.930 |
| 6DZL    | J_ARG.61  | NH2 | J_ASP.82  | OD2 | 3.985 |
| 6DZL    | G_ARG.38  | NH1 | G_ASP.86  | OD1 | 2.843 |
| 6DZL    | G_ARG.38  | NH2 | G_GLU.46  | OE1 | 3.120 |
| 6DZL    | G_ARG.38  | NH2 | G_GLU.46  | OE2 | 3.080 |
| 6DZL    | G_ARG.66  | NH2 | G_ASP.86  | OD2 | 3.660 |
| 6DZL    | G_HIS.96  | ND1 | J_GLU.55  | OE2 | 3.342 |
| 6DZL    | G_HIS.96  | NE2 | J_GLU.55  | OE1 | 3.570 |
| 6DZL    | G_HIS.96  | NE2 | J_GLU.55  | OE2 | 3.728 |

|      |           |     |           |     |       |
|------|-----------|-----|-----------|-----|-------|
| 6DZL | B_ARG_85  | NH2 | B_GLU_178 | OE1 | 3.931 |
| 6DZL | K_ARG_61  | NH2 | K_ASP_82  | OD2 | 3.984 |
| 6DZL | H_ARG_38  | NH1 | H_ASP_86  | OD1 | 2.845 |
| 6DZL | H_ARG_38  | NH2 | H_GLU_46  | OE1 | 3.120 |
| 6DZL | H_ARG_38  | NH2 | H_GLU_46  | OE2 | 3.080 |
| 6DZL | H_ARG_66  | NH2 | H_ASP_86  | OD2 | 3.660 |
| 6DZL | H_HIS_96  | ND1 | K_GLU_55  | OE2 | 3.341 |
| 6DZL | H_HIS_96  | NE2 | K_GLU_55  | OE1 | 3.571 |
| 6DZL | H_HIS_96  | NE2 | K_GLU_55  | OE2 | 3.727 |
| 6DZL | C_ARG_85  | NH2 | C_GLU_178 | OE1 | 3.930 |
| 6DZL | L_ARG_61  | NH2 | L_ASP_82  | OD2 | 3.984 |
| 6DZL | I_ARG_38  | NH1 | I_ASP_86  | OD1 | 2.844 |
| 6DZL | I_ARG_38  | NH2 | I_GLU_46  | OE1 | 3.120 |
| 6DZL | I_ARG_38  | NH2 | I_GLU_46  | OE2 | 3.080 |
| 6DZL | I_ARG_66  | NH2 | I_ASP_86  | OD2 | 3.660 |
| 6DZL | I_HIS_96  | ND1 | L_GLU_55  | OE2 | 3.341 |
| 6DZL | I_HIS_96  | NE2 | L_GLU_55  | OE1 | 3.571 |
| 6DZL | I_HIS_96  | NE2 | L_GLU_55  | OE2 | 3.727 |
| 6EA7 | A_ARG_64  | NH1 | A_GLU_100 | OE1 | 2.585 |
| 6EA7 | A_ARG_64  | NH1 | A_GLU_100 | OE2 | 2.698 |
| 6EA7 | A_ARG_85  | NH1 | A_GLU_178 | OE2 | 3.995 |
| 6EA7 | A_LYS_114 | NZ  | A_GLU_120 | OE2 | 3.917 |
| 6EA7 | A_ARG_136 | NH1 | A_GLU_106 | OE1 | 3.638 |
| 6EA7 | A_HIS_154 | NE2 | A_GLU_178 | OE1 | 2.817 |
| 6EA7 | A_ARG_164 | NH1 | A_ASP_163 | OD1 | 3.751 |
| 6EA7 | A_ARG_164 | NH1 | A_ASP_163 | OD2 | 3.561 |
| 6EA7 | A_ARG_172 | NH1 | A_GLU_120 | OE2 | 3.778 |
| 6EA7 | B_HIS_516 | NE2 | B_GLU_545 | OE1 | 3.238 |
| 6EA7 | B_ARG_559 | NH1 | A_GLU_103 | OE1 | 2.641 |
| 6EA7 | B_ARG_559 | NH1 | A_GLU_103 | OE2 | 3.432 |
| 6EA7 | B_ARG_559 | NH2 | A_GLU_103 | OE2 | 3.686 |
| 6EA7 | B_HIS_602 | ND1 | F_GLU_611 | OE1 | 3.135 |
| 6EA7 | C_HIS_39  | NE2 | C_ASP_55  | OD1 | 3.559 |
| 6EA7 | C_ARG_85  | NH1 | C_GLU_178 | OE1 | 3.607 |
| 6EA7 | C_ARG_85  | NH1 | C_GLU_178 | OE2 | 3.196 |
| 6EA7 | C_LYS_114 | NZ  | C_GLU_120 | OE2 | 3.697 |
| 6EA7 | C_ARG_130 | NH2 | C_ASP_163 | OD2 | 2.578 |
| 6EA7 | C_ARG_164 | NH1 | C_ASP_163 | OD1 | 3.787 |
| 6EA7 | C_ARG_172 | NH1 | C_GLU_120 | OE2 | 3.868 |
| 6EA7 | D_HIS_516 | NE2 | D_GLU_545 | OE1 | 3.935 |
| 6EA7 | D_ARG_559 | NH1 | C_GLU_103 | OE1 | 2.573 |
| 6EA7 | D_ARG_559 | NH1 | C_GLU_103 | OE2 | 3.488 |
| 6EA7 | D_ARG_559 | NH2 | C_GLU_103 | OE1 | 3.832 |
| 6EA7 | D_ARG_559 | NH2 | C_GLU_103 | OE2 | 3.318 |
| 6EA7 | D_HIS_602 | ND1 | B_GLU_611 | OE1 | 3.062 |
| 6EA7 | E_ARG_85  | NH1 | E_GLU_178 | OE1 | 3.412 |
| 6EA7 | E_ARG_85  | NH1 | E_GLU_178 | OE2 | 3.298 |
| 6EA7 | E_ARG_130 | NH2 | E_ASP_163 | OD2 | 2.654 |
| 6EA7 | E_HIS_154 | NE2 | E_GLU_178 | OE1 | 3.949 |
| 6EA7 | E_ARG_164 | NH1 | E_ASP_163 | OD1 | 3.520 |
| 6EA7 | E_ARG_164 | NH1 | E_ASP_163 | OD2 | 3.465 |
| 6EA7 | E_ARG_172 | NH2 | E_GLU_120 | OE2 | 3.923 |
| 6EA7 | F_ARG_559 | NH1 | E_GLU_103 | OE1 | 2.812 |
| 6EA7 | F_ARG_559 | NH1 | E_GLU_103 | OE2 | 3.584 |
| 6EA7 | F_ARG_559 | NH2 | E_GLU_103 | OE2 | 3.608 |
| 6EA7 | F_ARG_596 | NH2 | E_ASP_55  | OD1 | 2.483 |
| 6EA7 | F_ARG_596 | NH2 | E_ASP_55  | OD2 | 3.342 |
| 6EA7 | F_HIS_602 | ND1 | D_GLU_611 | OE1 | 3.253 |

|      |           |     |           |     |       |
|------|-----------|-----|-----------|-----|-------|
| 6EA7 | H_ARG_38  | NH1 | H_GLU_46  | OE1 | 3.611 |
| 6EA7 | H_ARG_38  | NH1 | H_ASP_90  | OD1 | 3.414 |
| 6EA7 | H_ARG_38  | NH2 | H_GLU_46  | OE1 | 2.876 |
| 6EA7 | H_ARG_38  | NH2 | H_GLU_46  | OE2 | 3.020 |
| 6EA7 | H_HIS_100 | ND1 | H_ASP_110 | OD2 | 3.934 |
| 6EA7 | H_HIS_100 | ND1 | L_GLU_55  | OE1 | 3.325 |
| 6EA7 | H_HIS_100 | NE2 | L_GLU_55  | OE1 | 3.655 |
| 6EA7 | H_HIS_108 | NE2 | L_ASP_50  | OD1 | 2.912 |
| 6EA7 | H_HIS_173 | ND1 | L_ASP_166 | OD1 | 3.947 |
| 6EA7 | H_HIS_173 | ND1 | L_ASP_166 | OD2 | 3.590 |
| 6EA7 | H_LYS_218 | NZ  | L_GLU_122 | OE1 | 2.826 |
| 6EA7 | L_LYS_39  | NZ  | L_GLU_42  | OE1 | 3.713 |
| 6EA7 | L_LYS_39  | NZ  | L_ASP_81  | OD1 | 3.700 |
| 6EA7 | L_ARG_61  | NH2 | L_ASP_82  | OD1 | 2.764 |
| 6EA7 | L_ARG_61  | NH2 | L_ASP_82  | OD2 | 3.165 |
| 6EA7 | L_LYS_102 | NZ  | L_GLU_164 | OE1 | 3.631 |
| 6EA7 | L_LYS_148 | NZ  | L_GLU_194 | OE1 | 3.419 |
| 6EA7 | M_ARG_38  | NH1 | M_GLU_46  | OE1 | 3.632 |
| 6EA7 | M_ARG_38  | NH2 | M_GLU_46  | OE1 | 2.819 |
| 6EA7 | M_ARG_38  | NH2 | M_GLU_46  | OE2 | 3.086 |
| 6EA7 | M_ARG_67  | NH1 | M_ASP_90  | OD1 | 3.655 |
| 6EA7 | M_ARG_67  | NH1 | M_ASP_90  | OD2 | 3.008 |
| 6EA7 | M_ARG_67  | NH2 | M_ASP_90  | OD1 | 2.976 |
| 6EA7 | M_ARG_67  | NH2 | M_ASP_90  | OD2 | 2.990 |
| 6EA7 | M_HIS_100 | ND1 | N_GLU_55  | OE1 | 3.446 |
| 6EA7 | M_HIS_100 | ND1 | N_GLU_55  | OE2 | 3.681 |
| 6EA7 | M_HIS_108 | ND1 | N_ASP_50  | OD1 | 3.757 |
| 6EA7 | M_HIS_108 | NE2 | N_ASP_50  | OD1 | 3.718 |
| 6EA7 | M_HIS_173 | ND1 | N_ASP_166 | OD2 | 3.701 |
| 6EA7 | M_LYS_219 | NZ  | M_GLU_221 | OE1 | 3.040 |
| 6EA7 | N_LYS_39  | NZ  | N_ASP_81  | OD1 | 3.604 |
| 6EA7 | N_ARG_61  | NH2 | N_ASP_82  | OD1 | 2.680 |
| 6EA7 | N_ARG_61  | NH2 | N_ASP_82  | OD2 | 3.258 |
| 6EA7 | N_LYS_102 | NZ  | N_GLU_164 | OE1 | 3.534 |
| 6EA7 | N_LYS_148 | NZ  | N_GLU_194 | OE1 | 3.192 |
| 6EA7 | N_HIS_188 | ND1 | N_ASP_150 | OD2 | 3.491 |
| 6EA7 | Q_ARG_38  | NH1 | Q_GLU_46  | OE1 | 3.581 |
| 6EA7 | Q_ARG_38  | NH2 | Q_GLU_46  | OE1 | 3.006 |
| 6EA7 | Q_ARG_38  | NH2 | Q_GLU_46  | OE2 | 3.019 |
| 6EA7 | Q_ARG_67  | NH1 | Q_ASP_90  | OD1 | 3.489 |
| 6EA7 | Q_ARG_67  | NH1 | Q_ASP_90  | OD2 | 2.319 |
| 6EA7 | Q_ARG_67  | NH2 | Q_ASP_90  | OD1 | 3.689 |
| 6EA7 | Q_ARG_67  | NH2 | Q_ASP_90  | OD2 | 3.153 |
| 6EA7 | Q_HIS_108 | NE2 | R_ASP_50  | OD1 | 3.227 |
| 6EA7 | Q_HIS_173 | ND1 | R_ASP_166 | OD1 | 3.817 |
| 6EA7 | Q_HIS_173 | ND1 | R_ASP_166 | OD2 | 3.600 |
| 6EA7 | R_ARG_24  | NH1 | R_GLU_70  | OE1 | 2.987 |
| 6EA7 | R_ARG_24  | NH1 | R_GLU_70  | OE2 | 2.873 |
| 6EA7 | R_LYS_39  | NZ  | R_GLU_42  | OE1 | 3.837 |
| 6EA7 | R_LYS_39  | NZ  | R_ASP_81  | OD1 | 3.859 |
| 6EA7 | R_ARG_61  | NH2 | R_ASP_82  | OD1 | 2.608 |
| 6EA7 | R_ARG_61  | NH2 | R_ASP_82  | OD2 | 3.334 |
| 6EA7 | R_LYS_102 | NZ  | R_GLU_164 | OE1 | 3.378 |
| 6EA7 | R_LYS_106 | NZ  | R_GLU_104 | OE1 | 3.728 |
| 6EA7 | R_LYS_148 | NZ  | R_GLU_194 | OE1 | 3.641 |
| 6F5U | A_HIS_39  | NE2 | A_ASP_55  | OD1 | 3.607 |
| 6F5U | A_HIS_39  | NE2 | A_ASP_55  | OD2 | 3.205 |
| 6F5U | A_ARG_85  | NH1 | A_GLU_178 | OE1 | 3.593 |

|      |           |     |           |     |       |
|------|-----------|-----|-----------|-----|-------|
| 6F5U | A_ARG_85  | NH1 | A_GLU_178 | OE2 | 2.633 |
| 6F5U | A_LYS_114 | NZ  | A_GLU_120 | OE2 | 3.481 |
| 6F5U | A_ARG_130 | NH2 | A_ASP_163 | OD2 | 3.086 |
| 6F5U | A_HIS_154 | NE2 | A_GLU_178 | OE1 | 2.646 |
| 6F5U | A_ARG_164 | NH1 | A_ASP_163 | OD1 | 3.541 |
| 6F5U | A_ARG_164 | NH1 | A_ASP_163 | OD2 | 3.126 |
| 6F5U | A_ARG_247 | NH2 | A_GLU_245 | OE1 | 3.242 |
| 6F5U | A_ARG_266 | NH2 | A_ASP_237 | OD2 | 3.400 |
| 6F5U | B_LYS_510 | NZ  | A_GLU_292 | OE1 | 3.345 |
| 6F5U | B_HIS_516 | NE2 | B_GLU_545 | OE1 | 2.737 |
| 6F5U | B_ARG_559 | NH1 | A_GLU_103 | OE1 | 2.631 |
| 6F5U | B_ARG_559 | NH1 | A_GLU_103 | OE2 | 3.833 |
| 6F5U | B_ARG_559 | NH2 | A_GLU_103 | OE1 | 3.290 |
| 6F5U | B_ARG_559 | NH2 | A_GLU_103 | OE2 | 2.992 |
| 6F6I | A_ARG_85  | NH1 | A_GLU_178 | OE1 | 3.391 |
| 6F6I | A_ARG_85  | NH1 | A_GLU_178 | OE2 | 2.492 |
| 6F6I | A_LYS_114 | NZ  | A_GLU_120 | OE2 | 3.662 |
| 6F6I | A_ARG_130 | NH2 | A_ASP_163 | OD1 | 3.094 |
| 6F6I | A_LYS_140 | NZ  | A_GLU_112 | OE2 | 3.920 |
| 6F6I | A_HIS_154 | NE2 | A_GLU_178 | OE1 | 2.814 |
| 6F6I | A_ARG_164 | NH1 | A_ASP_163 | OD1 | 3.155 |
| 6F6I | A_ARG_164 | NH1 | A_ASP_163 | OD2 | 3.520 |
| 6F6I | A_ARG_247 | NH2 | A_GLU_245 | OE2 | 2.546 |
| 6F6I | A_ARG_266 | NH2 | A_ASP_237 | OD2 | 3.974 |
| 6F6I | B_LYS_510 | NZ  | A_GLU_292 | OE1 | 3.377 |
| 6F6I | B_HIS_516 | NE2 | B_GLU_545 | OE1 | 2.567 |
| 6F6I | B_ARG_559 | NH1 | A_GLU_103 | OE1 | 3.800 |
| 6F6I | B_ARG_559 | NH1 | A_GLU_103 | OE2 | 2.815 |
| 6F6I | B_ARG_559 | NH2 | A_GLU_103 | OE1 | 3.096 |
| 6F6I | B_ARG_559 | NH2 | A_GLU_103 | OE2 | 3.529 |
| 6F6I | B_HIS_628 | ND1 | B_ASP_629 | OD1 | 3.915 |
| 6F6I | B_HIS_628 | NE2 | B_ASP_629 | OD1 | 3.799 |
| 6F6N | A_LYS_50  | NZ  | A_ASP_49  | OD1 | 3.536 |
| 6F6N | A_LYS_50  | NZ  | A_ASP_49  | OD2 | 3.944 |
| 6F6N | A_ARG_85  | NH1 | A_GLU_178 | OE1 | 3.489 |
| 6F6N | A_ARG_85  | NH1 | A_GLU_178 | OE2 | 2.503 |
| 6F6N | A_LYS_114 | NZ  | A_GLU_120 | OE2 | 3.710 |
| 6F6N | A_ARG_130 | NH2 | A_ASP_163 | OD2 | 3.005 |
| 6F6N | A_HIS_154 | NE2 | A_GLU_178 | OE1 | 2.727 |
| 6F6N | A_ARG_164 | NH1 | A_ASP_163 | OD1 | 3.435 |
| 6F6N | A_ARG_164 | NH1 | A_ASP_163 | OD2 | 2.950 |
| 6F6N | A_ARG_247 | NH1 | A_GLU_245 | OE1 | 3.669 |
| 6F6N | A_ARG_266 | NH2 | A_ASP_237 | OD2 | 3.429 |
| 6F6N | A_LYS_276 | NZ  | A_GLU_245 | OE2 | 2.564 |
| 6F6N | B_LYS_510 | NZ  | A_GLU_292 | OE1 | 2.639 |
| 6F6N | B_HIS_516 | NE2 | B_GLU_545 | OE1 | 2.799 |
| 6F6N | B_ARG_559 | NH1 | A_GLU_103 | OE1 | 2.593 |
| 6F6N | B_ARG_559 | NH1 | A_GLU_103 | OE2 | 3.789 |
| 6F6N | B_ARG_559 | NH2 | A_GLU_103 | OE1 | 3.215 |
| 6F6N | B_ARG_559 | NH2 | A_GLU_103 | OE2 | 2.904 |
| 6F6N | B_LYS_588 | NZ  | A_ASP_47  | OD1 | 3.696 |
| 6F6N | B_LYS_588 | NZ  | A_ASP_47  | OD2 | 2.975 |
| 6F6S | A_ARG_85  | NH1 | A_GLU_178 | OE1 | 3.259 |
| 6F6S | A_ARG_85  | NH1 | A_GLU_178 | OE2 | 2.372 |
| 6F6S | A_LYS_114 | NZ  | A_GLU_120 | OE2 | 3.380 |
| 6F6S | A_ARG_130 | NH2 | A_ASP_163 | OD1 | 3.014 |
| 6F6S | A_HIS_154 | NE2 | A_GLU_178 | OE1 | 3.039 |
| 6F6S | A_ARG_164 | NH1 | A_ASP_163 | OD1 | 2.810 |

|      |           |     |           |     |       |
|------|-----------|-----|-----------|-----|-------|
| 6F6S | A_ARG_164 | NH1 | A_ASP_163 | OD2 | 3.556 |
| 6F6S | B_LYS_510 | NZ  | A_GLU_292 | OE1 | 2.331 |
| 6F6S | B_LYS_510 | NZ  | A_GLU_292 | OE2 | 3.397 |
| 6F6S | B_HIS_516 | NE2 | B_GLU_545 | OE1 | 2.731 |
| 6F6S | B_ARG_559 | NH1 | A_GLU_103 | OE1 | 2.656 |
| 6F6S | B_ARG_559 | NH1 | A_GLU_103 | OE2 | 3.920 |
| 6F6S | B_ARG_559 | NH2 | A_GLU_103 | OE1 | 3.146 |
| 6F6S | B_ARG_559 | NH2 | A_GLU_103 | OE2 | 2.951 |
| 6F6S | B_LYS_588 | NZ  | A_ASP_47  | OD1 | 2.944 |
| 6F6S | B_LYS_588 | NZ  | A_ASP_47  | OD2 | 2.772 |
| 6F6S | B_LYS_617 | NZ  | B_ASP_614 | OD1 | 3.893 |
| 6G95 | A_HIS_39  | NE2 | A_ASP_55  | OD1 | 2.899 |
| 6G95 | A_HIS_39  | NE2 | A_ASP_55  | OD2 | 3.064 |
| 6G95 | A_ARG_85  | NH1 | A_GLU_178 | OE1 | 3.522 |
| 6G95 | A_ARG_85  | NH1 | A_GLU_178 | OE2 | 2.681 |
| 6G95 | A_LYS_114 | NZ  | A_GLU_120 | OE1 | 3.918 |
| 6G95 | A_LYS_114 | NZ  | A_GLU_120 | OE2 | 3.675 |
| 6G95 | A_ARG_130 | NH2 | A_ASP_163 | OD1 | 3.040 |
| 6G95 | A_LYS_140 | NZ  | A_GLU_112 | OE1 | 3.777 |
| 6G95 | A_HIS_154 | NE2 | A_GLU_178 | OE1 | 2.904 |
| 6G95 | A_ARG_164 | NH1 | A_ASP_163 | OD1 | 2.830 |
| 6G95 | A_ARG_164 | NH1 | A_ASP_163 | OD2 | 3.454 |
| 6G95 | A_ARG_266 | NH2 | A_ASP_237 | OD2 | 3.135 |
| 6G95 | B_HIS_516 | NE2 | B_GLU_545 | OE1 | 2.525 |
| 6G95 | B_ARG_559 | NH1 | A_GLU_103 | OE1 | 2.683 |
| 6G95 | B_ARG_559 | NH1 | A_GLU_103 | OE2 | 3.879 |
| 6G95 | B_ARG_559 | NH2 | A_GLU_103 | OE1 | 3.249 |
| 6G95 | B_ARG_559 | NH2 | A_GLU_103 | OE2 | 2.973 |
| 6G9B | A_ARG_85  | NH1 | A_GLU_178 | OE1 | 3.384 |
| 6G9B | A_ARG_85  | NH1 | A_GLU_178 | OE2 | 2.574 |
| 6G9B | A_LYS_114 | NZ  | A_GLU_120 | OE1 | 3.989 |
| 6G9B | A_LYS_114 | NZ  | A_GLU_120 | OE2 | 3.841 |
| 6G9B | A_ARG_130 | NH2 | A_ASP_163 | OD1 | 3.043 |
| 6G9B | A_LYS_140 | NZ  | A_GLU_112 | OE2 | 3.639 |
| 6G9B | A_HIS_154 | NE2 | A_GLU_178 | OE1 | 2.960 |
| 6G9B | A_ARG_164 | NH1 | A_ASP_163 | OD1 | 2.869 |
| 6G9B | A_ARG_164 | NH1 | A_ASP_163 | OD2 | 3.373 |
| 6G9B | A_ARG_172 | NH1 | A_GLU_120 | OE2 | 3.934 |
| 6G9B | A_ARG_247 | NH2 | A_GLU_245 | OE1 | 3.502 |
| 6G9B | A_ARG_266 | NH2 | A_ASP_237 | OD2 | 3.075 |
| 6G9B | B_LYS_510 | NZ  | A_GLU_292 | OE1 | 3.414 |
| 6G9B | B_HIS_516 | NE2 | B_GLU_545 | OE1 | 2.666 |
| 6G9B | B_ARG_559 | NH1 | A_GLU_103 | OE1 | 2.574 |
| 6G9B | B_ARG_559 | NH1 | A_GLU_103 | OE2 | 3.760 |
| 6G9B | B_ARG_559 | NH2 | A_GLU_103 | OE1 | 3.199 |
| 6G9B | B_ARG_559 | NH2 | A_GLU_103 | OE2 | 2.870 |
| 6G9B | B_LYS_588 | NZ  | A_ASP_47  | OD1 | 3.317 |
| 6G9B | B_LYS_588 | NZ  | A_ASP_47  | OD2 | 2.892 |
| 6G9B | B_LYS_617 | NZ  | B_ASP_614 | OD2 | 3.817 |
| 6G9B | B_HIS_628 | NE2 | B_ASP_629 | OD1 | 3.701 |
| 6G9B | B_HIS_628 | NE2 | B_ASP_629 | OD2 | 3.971 |
| 6G9I | A_HIS_39  | NE2 | A_ASP_55  | OD1 | 3.027 |
| 6G9I | A_HIS_39  | NE2 | A_ASP_55  | OD2 | 2.861 |
| 6G9I | A_ARG_85  | NH1 | A_GLU_178 | OE1 | 3.616 |
| 6G9I | A_ARG_85  | NH1 | A_GLU_178 | OE2 | 2.527 |
| 6G9I | A_LYS_114 | NZ  | A_GLU_120 | OE2 | 3.647 |
| 6G9I | A_ARG_130 | NH2 | A_ASP_163 | OD1 | 3.039 |
| 6G9I | A_HIS_154 | NE2 | A_GLU_178 | OE1 | 2.656 |

|      |           |     |           |     |       |
|------|-----------|-----|-----------|-----|-------|
| 6G9I | A_ARG_164 | NH1 | A_ASP_163 | OD1 | 3.026 |
| 6G9I | A_ARG_164 | NH1 | A_ASP_163 | OD2 | 3.451 |
| 6G9I | A_ARG_266 | NH2 | A_ASP_237 | OD2 | 3.464 |
| 6G9I | B_HIS_516 | NE2 | B_GLU_545 | OE1 | 2.739 |
| 6G9I | B_ARG_559 | NH1 | A_GLU_103 | OE1 | 2.689 |
| 6G9I | B_ARG_559 | NH1 | A_GLU_103 | OE2 | 3.794 |
| 6G9I | B_ARG_559 | NH2 | A_GLU_103 | OE1 | 3.340 |
| 6G9I | B_ARG_559 | NH2 | A_GLU_103 | OE2 | 2.940 |
| 6G9I | B_LYS_622 | NZ  | B_ASP_621 | OD1 | 2.501 |
| 6G9I | B_LYS_622 | NZ  | B_ASP_621 | OD2 | 3.672 |
| 6HRO | A_ARG_85  | NH1 | A_GLU_178 | OE1 | 3.459 |
| 6HRO | A_ARG_85  | NH1 | A_GLU_178 | OE2 | 2.606 |
| 6HRO | A_LYS_114 | NZ  | A_GLU_120 | OE2 | 3.759 |
| 6HRO | A_ARG_130 | NH2 | A_ASP_163 | OD1 | 2.957 |
| 6HRO | A_HIS_154 | NE2 | A_GLU_178 | OE1 | 3.012 |
| 6HRO | A_ARG_164 | NH1 | A_ASP_163 | OD1 | 3.206 |
| 6HRO | A_ARG_164 | NH1 | A_ASP_163 | OD2 | 3.548 |
| 6HRO | A_ARG_266 | NH2 | A_ASP_237 | OD2 | 3.585 |
| 6HRO | B_LYS_510 | NZ  | A_GLU_292 | OE1 | 3.852 |
| 6HRO | B_HIS_516 | NE2 | B_GLU_545 | OE1 | 2.827 |
| 6HRO | B_ARG_559 | NH1 | A_GLU_103 | OE1 | 2.817 |
| 6HRO | B_ARG_559 | NH1 | A_GLU_103 | OE2 | 3.911 |
| 6HRO | B_ARG_559 | NH2 | A_GLU_103 | OE1 | 3.514 |
| 6HRO | B_ARG_559 | NH2 | A_GLU_103 | OE2 | 3.164 |
| 6HRO | B_LYS_588 | NZ  | A_ASP_47  | OD1 | 3.207 |
| 6HRO | B_LYS_588 | NZ  | A_ASP_47  | OD2 | 2.778 |
| 6HS4 | A_HIS_39  | NE2 | A_ASP_55  | OD1 | 3.180 |
| 6HS4 | A_HIS_39  | NE2 | A_ASP_55  | OD2 | 2.847 |
| 6HS4 | A_ARG_85  | NH1 | A_GLU_178 | OE1 | 3.429 |
| 6HS4 | A_ARG_85  | NH1 | A_GLU_178 | OE2 | 2.535 |
| 6HS4 | A_LYS_114 | NZ  | A_GLU_120 | OE2 | 3.578 |
| 6HS4 | A_ARG_130 | NH2 | A_ASP_163 | OD1 | 3.064 |
| 6HS4 | A_HIS_154 | NE2 | A_GLU_178 | OE1 | 2.801 |
| 6HS4 | A_ARG_164 | NH1 | A_ASP_163 | OD1 | 3.114 |
| 6HS4 | A_ARG_164 | NH1 | A_ASP_163 | OD2 | 3.585 |
| 6HS4 | A_ARG_266 | NH2 | A_ASP_237 | OD2 | 3.211 |
| 6HS4 | B_HIS_516 | NE2 | B_GLU_545 | OE1 | 2.734 |
| 6HS4 | B_ARG_559 | NH1 | A_GLU_103 | OE1 | 2.624 |
| 6HS4 | B_ARG_559 | NH1 | A_GLU_103 | OE2 | 3.811 |
| 6HS4 | B_ARG_559 | NH2 | A_GLU_103 | OE1 | 3.176 |
| 6HS4 | B_ARG_559 | NH2 | A_GLU_103 | OE2 | 2.846 |
| 6HS4 | B_LYS_588 | NZ  | A_ASP_47  | OD1 | 3.053 |
| 6HS4 | B_LYS_588 | NZ  | A_ASP_47  | OD2 | 2.954 |
| 6MAM | A_ARG_38  | NH1 | A_ASP_92  | OD1 | 3.032 |
| 6MAM | A_ARG_38  | NH2 | A_GLU_46  | OE1 | 3.455 |
| 6MAM | A_ARG_38  | NH2 | A_GLU_46  | OE2 | 3.429 |
| 6MAM | A_ARG_50  | NH1 | A_ASP_61  | OD2 | 2.812 |
| 6MAM | A_ARG_50  | NH2 | A_GLU_116 | OE2 | 2.918 |
| 6MAM | A_ARG_69  | NH1 | A_ASP_92  | OD2 | 2.800 |
| 6MAM | A_ARG_69  | NH2 | A_ASP_92  | OD1 | 3.038 |
| 6MAM | A_ARG_69  | NH2 | A_ASP_92  | OD2 | 2.756 |
| 6MAM | A_ARG_74  | NH2 | A_ASP_76  | OD1 | 3.398 |
| 6MAM | A_LYS_78  | NZ  | A_ASP_75  | OD2 | 3.612 |
| 6MAM | A_ARG_106 | NH1 | A_ASP_56  | OD2 | 3.214 |
| 6MAM | A_ARG_106 | NH2 | A_ASP_56  | OD1 | 3.431 |
| 6MAM | A_ARG_106 | NH2 | A_ASP_56  | OD2 | 2.235 |
| 6MAM | A_LYS_161 | NZ  | A_ASP_162 | OD1 | 2.861 |
| 6MAM | A_LYS_227 | NZ  | B_GLU_125 | OE1 | 3.431 |

|      |           |     |           |     |       |
|------|-----------|-----|-----------|-----|-------|
| 6MAM | A_LYS.228 | NZ  | A_GLU.230 | OE1 | 2.933 |
| 6MAM | A_LYS.228 | NZ  | A_GLU.230 | OE2 | 2.500 |
| 6MAM | B_ARG.3   | NH1 | B_ASP.1   | OD1 | 3.296 |
| 6MAM | B_ARG.3   | NH2 | B_ASP.1   | OD1 | 3.656 |
| 6MAM | B_ARG.24  | NH2 | B_ASP.70  | OD1 | 3.387 |
| 6MAM | B_ARG.24  | NH2 | B_ASP.70  | OD2 | 3.517 |
| 6MAM | B_ARG.61  | NH2 | B_GLU.81  | OE2 | 3.262 |
| 6MAM | B_ARG.61  | NH2 | B_ASP.82  | OD1 | 3.695 |
| 6MAM | B_LYS.105 | NZ  | B_GLU.167 | OE1 | 2.898 |
| 6MAM | B_LYS.105 | NZ  | B_GLU.167 | OE2 | 3.314 |
| 6MAM | B_LYS.151 | NZ  | B_GLU.197 | OE1 | 2.860 |
| 6MAM | C_ARG.38  | NH1 | C_ASP.92  | OD1 | 2.663 |
| 6MAM | C_ARG.38  | NH2 | C_GLU.46  | OE1 | 3.453 |
| 6MAM | C_ARG.38  | NH2 | C_GLU.46  | OE2 | 3.332 |
| 6MAM | C_ARG.38  | NH2 | C_ASP.92  | OD1 | 3.874 |
| 6MAM | C_ARG.50  | NH1 | C_ASP.61  | OD2 | 3.061 |
| 6MAM | C_ARG.69  | NH1 | C_ASP.92  | OD2 | 2.947 |
| 6MAM | C_ARG.69  | NH2 | C_ASP.92  | OD1 | 3.364 |
| 6MAM | C_ARG.69  | NH2 | C_ASP.92  | OD2 | 2.722 |
| 6MAM | C_ARG.74  | NH2 | C_ASP.76  | OD1 | 3.320 |
| 6MAM | C_LYS.78  | NZ  | C_ASP.75  | OD2 | 3.377 |
| 6MAM | C_LYS.89  | NZ  | C_GLU.91  | OE2 | 3.915 |
| 6MAM | C_ARG.106 | NH2 | C_ASP.56  | OD1 | 3.976 |
| 6MAM | C_ARG.106 | NH2 | C_ASP.56  | OD2 | 2.463 |
| 6MAM | C_LYS.161 | NZ  | C_ASP.162 | OD1 | 2.840 |
| 6MAM | C_LYS.161 | NZ  | C_ASP.162 | OD2 | 3.813 |
| 6MAM | C_HIS.182 | NE2 | D_ASP.169 | OD2 | 3.087 |
| 6MAM | C_LYS.227 | NZ  | D_GLU.125 | OE1 | 3.951 |
| 6MAM | D_ARG.3   | NH1 | D_ASP.1   | OD1 | 3.278 |
| 6MAM | D_ARG.3   | NH1 | D_ASP.1   | OD2 | 3.738 |
| 6MAM | D_ARG.3   | NH2 | D_ASP.1   | OD1 | 2.805 |
| 6MAM | D_ARG.3   | NH2 | D_ASP.1   | OD2 | 3.711 |
| 6MAM | D_ARG.61  | NH2 | D_GLU.81  | OE2 | 3.528 |
| 6MAM | D_ARG.61  | NH2 | D_ASP.82  | OD1 | 2.930 |
| 6MAM | D_ARG.61  | NH2 | D_ASP.82  | OD2 | 3.239 |
| 6MAM | D_LYS.105 | NZ  | D_GLU.167 | OE1 | 2.533 |
| 6MAM | D_LYS.105 | NZ  | D_GLU.167 | OE2 | 3.413 |
| 6MAM | D_LYS.151 | NZ  | D_GLU.197 | OE1 | 2.852 |
| 6MAM | D_HIS.191 | ND1 | D_ASP.153 | OD2 | 2.884 |
| 6MAM | E_ARG.38  | NH1 | E_ASP.92  | OD1 | 2.865 |
| 6MAM | E_ARG.38  | NH2 | E_GLU.46  | OE1 | 3.478 |
| 6MAM | E_ARG.38  | NH2 | E_GLU.46  | OE2 | 3.114 |
| 6MAM | E_ARG.38  | NH2 | E_ASP.92  | OD1 | 3.571 |
| 6MAM | E_ARG.50  | NH2 | E_ASP.61  | OD2 | 2.222 |
| 6MAM | E_ARG.69  | NH1 | E_ASP.92  | OD2 | 3.919 |
| 6MAM | E_ARG.74  | NH2 | E_ASP.76  | OD1 | 3.361 |
| 6MAM | E_LYS.78  | NZ  | E_ASP.75  | OD2 | 3.911 |
| 6MAM | E_ARG.106 | NH1 | E_ASP.56  | OD1 | 3.912 |
| 6MAM | E_ARG.106 | NH1 | E_ASP.56  | OD2 | 2.681 |
| 6MAM | E_ARG.106 | NH2 | E_ASP.56  | OD2 | 2.658 |
| 6MAM | E_LYS.161 | NZ  | E_ASP.162 | OD1 | 2.972 |
| 6MAM | F_ARG.24  | NH2 | F_ASP.70  | OD1 | 3.490 |
| 6MAM | F_ARG.24  | NH2 | F_ASP.70  | OD2 | 3.587 |
| 6MAM | F_ARG.61  | NH2 | F_GLU.81  | OE2 | 3.395 |
| 6MAM | F_ARG.61  | NH2 | F_ASP.82  | OD1 | 2.777 |
| 6MAM | F_ARG.61  | NH2 | F_ASP.82  | OD2 | 3.559 |
| 6MAM | F_LYS.105 | NZ  | F_GLU.167 | OE1 | 3.155 |
| 6MAM | F_LYS.105 | NZ  | F_GLU.167 | OE2 | 3.321 |

|      |           |     |           |     |       |
|------|-----------|-----|-----------|-----|-------|
| 6MAM | F_LYS.128 | NZ  | F_GLU.125 | OE1 | 3.556 |
| 6MAM | F_LYS.128 | NZ  | F_GLU.125 | OE2 | 3.637 |
| 6MAM | F_LYS.151 | NZ  | F_GLU.197 | OE1 | 2.889 |
| 6MAM | F_LYS.190 | NZ  | F_ASP.187 | OD1 | 3.330 |
| 6MAM | G_ARG.85  | NH1 | G_GLU.178 | OE1 | 3.649 |
| 6MAM | G_ARG.85  | NH1 | G_GLU.178 | OE2 | 2.952 |
| 6MAM | G_LYS.114 | NZ  | G_GLU.120 | OE2 | 3.654 |
| 6MAM | G_ARG.130 | NH2 | G_ASP.163 | OD2 | 3.414 |
| 6MAM | G_HIS.154 | NE2 | G_GLU.178 | OE1 | 2.787 |
| 6MAM | G_ARG.164 | NH1 | G_ASP.163 | OD1 | 2.973 |
| 6MAM | G_ARG.164 | NH1 | G_ASP.163 | OD2 | 3.775 |
| 6MAM | G_ARG.164 | NH2 | G_ASP.163 | OD1 | 3.075 |
| 6MAM | G_ARG.164 | NH2 | G_ASP.163 | OD2 | 2.437 |
| 6MAM | G_ARG.172 | NH1 | G_GLU.120 | OE2 | 3.996 |
| 6MAM | H_HIS.516 | NE2 | H_GLU.545 | OE1 | 2.716 |
| 6MAM | H_ARG.559 | NH1 | G_GLU.103 | OE1 | 2.237 |
| 6MAM | H_ARG.559 | NH1 | G_GLU.103 | OE2 | 3.123 |
| 6MAM | H_ARG.559 | NH2 | G_GLU.103 | OE1 | 3.565 |
| 6MAM | H_ARG.559 | NH2 | G_GLU.103 | OE2 | 2.826 |
| 6MAM | I_ARG.85  | NH1 | I_GLU.178 | OE1 | 3.469 |
| 6MAM | I_ARG.85  | NH1 | I_GLU.178 | OE2 | 2.648 |
| 6MAM | I_LYS.114 | NZ  | I_GLU.120 | OE1 | 3.810 |
| 6MAM | I_LYS.114 | NZ  | I_GLU.120 | OE2 | 3.218 |
| 6MAM | I_ARG.130 | NH2 | I_ASP.163 | OD2 | 3.267 |
| 6MAM | I_HIS.154 | NE2 | I_GLU.178 | OE1 | 2.764 |
| 6MAM | I_ARG.164 | NH1 | I_ASP.163 | OD1 | 3.601 |
| 6MAM | I_ARG.164 | NH1 | I_ASP.163 | OD2 | 2.921 |
| 6MAM | I_ARG.172 | NH1 | I_GLU.120 | OE2 | 3.984 |
| 6MAM | J_HIS.516 | NE2 | J_GLU.545 | OE1 | 2.735 |
| 6MAM | J_ARG.559 | NH1 | I_GLU.103 | OE1 | 2.281 |
| 6MAM | J_ARG.559 | NH1 | I_GLU.103 | OE2 | 3.223 |
| 6MAM | J_ARG.559 | NH2 | I_GLU.103 | OE1 | 3.504 |
| 6MAM | J_ARG.559 | NH2 | I_GLU.103 | OE2 | 2.826 |
| 6MAM | K_ARG.85  | NH1 | K_GLU.178 | OE1 | 3.549 |
| 6MAM | K_ARG.85  | NH1 | K_GLU.178 | OE2 | 2.788 |
| 6MAM | K_LYS.114 | NZ  | K_GLU.120 | OE1 | 3.898 |
| 6MAM | K_LYS.114 | NZ  | K_GLU.120 | OE2 | 3.320 |
| 6MAM | K_ARG.130 | NH2 | K_ASP.163 | OD2 | 3.275 |
| 6MAM | K_HIS.154 | NE2 | K_GLU.178 | OE1 | 3.032 |
| 6MAM | K_ARG.164 | NH1 | K_ASP.163 | OD1 | 3.574 |
| 6MAM | K_ARG.164 | NH1 | K_ASP.163 | OD2 | 2.908 |
| 6MAM | K_ARG.172 | NH1 | K_GLU.120 | OE2 | 3.957 |
| 6MAM | L_HIS.516 | NE2 | L_GLU.545 | OE1 | 2.681 |
| 6MAM | L_ARG.559 | NH1 | K_GLU.103 | OE1 | 2.658 |
| 6MAM | L_ARG.559 | NH1 | K_GLU.103 | OE2 | 3.420 |
| 6MAM | L_ARG.559 | NH2 | K_GLU.103 | OE1 | 3.722 |
| 6MAM | L_ARG.559 | NH2 | K_GLU.103 | OE2 | 2.995 |
| 6NAE | A_HIS.39  | NE2 | A_ASP.55  | OD1 | 2.745 |
| 6NAE | A_HIS.39  | NE2 | A_ASP.55  | OD2 | 3.133 |
| 6NAE | A_ARG.85  | NH1 | A_GLU.178 | OE1 | 3.501 |
| 6NAE | A_ARG.85  | NH1 | A_GLU.178 | OE2 | 2.362 |
| 6NAE | A_ARG.130 | NH2 | A_ASP.163 | OD2 | 3.231 |
| 6NAE | A_HIS.154 | NE2 | A_GLU.178 | OE1 | 2.851 |
| 6NAE | A_ARG.164 | NH1 | A_ASP.163 | OD1 | 3.478 |
| 6NAE | A_ARG.164 | NH1 | A_ASP.163 | OD2 | 2.808 |
| 6NAE | A_ARG.172 | NH1 | A_GLU.120 | OE2 | 3.850 |
| 6NAE | A_ARG.266 | NH2 | A_ASP.237 | OD2 | 3.596 |
| 6NAE | B_LYS.510 | NZ  | A_GLU.292 | OE1 | 2.350 |

|      |           |     |           |     |       |
|------|-----------|-----|-----------|-----|-------|
| 6NAE | B_LYS_510 | NZ  | A_GLU_292 | OE2 | 3.768 |
| 6NAE | B_HIS_516 | NE2 | B_GLU_545 | OE1 | 2.507 |
| 6NAE | B_ARG_559 | NH1 | A_GLU_103 | OE1 | 2.669 |
| 6NAE | B_ARG_559 | NH1 | A_GLU_103 | OE2 | 3.739 |
| 6NAE | B_ARG_559 | NH2 | A_GLU_103 | OE1 | 3.488 |
| 6NAE | B_ARG_559 | NH2 | A_GLU_103 | OE2 | 3.068 |
| 6QD7 | L_ARG_45  | NH1 | L_GLU_81  | OE2 | 3.933 |
| 6QD7 | L_ARG_61  | NH1 | L_GLU_79  | OE1 | 3.350 |
| 6QD7 | L_ARG_61  | NH1 | L_GLU_79  | OE2 | 2.563 |
| 6QD7 | L_ARG_61  | NH2 | L_GLU_79  | OE1 | 3.628 |
| 6QD7 | L_ARG_61  | NH2 | L_GLU_79  | OE2 | 3.965 |
| 6QD7 | L_ARG_61  | NH2 | L_GLU_81  | OE1 | 3.504 |
| 6QD7 | L_ARG_91  | NH1 | D_GLU_502 | OE1 | 3.607 |
| 6QD7 | L_ARG_91  | NH2 | L_GLU_50  | OE1 | 3.410 |
| 6QD7 | H_ARG_38  | NH1 | H_ASP_87  | OD1 | 2.843 |
| 6QD7 | H_LYS_65  | NZ  | D_ASP_552 | OD1 | 3.151 |
| 6QD7 | H_LYS_65  | NZ  | D_ASP_552 | OD2 | 3.487 |
| 6QD7 | H_ARG_67  | NH1 | H_ASP_87  | OD1 | 3.877 |
| 6QD7 | H_ARG_67  | NH1 | H_ASP_87  | OD2 | 2.749 |
| 6QD7 | H_ARG_67  | NH2 | H_ASP_87  | OD1 | 3.605 |
| 6QD7 | H_ARG_67  | NH2 | H_ASP_87  | OD2 | 3.759 |
| 6QD7 | H_LYS_95  | NZ  | H_ASP_106 | OD1 | 2.959 |
| 6QD7 | H_LYS_95  | NZ  | H_ASP_106 | OD2 | 3.089 |
| 6QD7 | H_ARG_101 | NH1 | D_GLU_564 | OE1 | 3.838 |
| 6QD7 | H_ARG_101 | NH1 | D_GLU_564 | OE2 | 2.869 |
| 6QD7 | H_ARG_101 | NH2 | D_GLU_502 | OE1 | 3.497 |
| 6QD7 | H_ARG_101 | NH2 | D_GLU_502 | OE2 | 3.635 |
| 6QD7 | H_ARG_101 | NH2 | D_GLU_564 | OE1 | 3.061 |
| 6QD7 | H_ARG_101 | NH2 | D_GLU_564 | OE2 | 3.438 |
| 6QD7 | A_ARG_64  | NH2 | A_ASP_192 | OD1 | 3.858 |
| 6QD7 | A_ARG_85  | NH1 | A_GLU_178 | OE1 | 3.413 |
| 6QD7 | A_ARG_85  | NH1 | A_GLU_178 | OE2 | 3.024 |
| 6QD7 | A_LYS_114 | NZ  | A_GLU_120 | OE1 | 3.280 |
| 6QD7 | A_ARG_130 | NH2 | A_ASP_163 | OD1 | 3.286 |
| 6QD7 | A_ARG_134 | NH1 | B_GLU_545 | OE2 | 3.138 |
| 6QD7 | A_HIS_154 | ND1 | A_GLU_156 | OE1 | 3.400 |
| 6QD7 | A_HIS_154 | NE2 | A_GLU_178 | OE1 | 2.937 |
| 6QD7 | A_ARG_164 | NH1 | A_ASP_163 | OD1 | 3.712 |
| 6QD7 | A_ARG_164 | NH1 | A_ASP_163 | OD2 | 3.939 |
| 6QD7 | B_ARG_559 | NH1 | A_GLU_103 | OE1 | 2.604 |
| 6QD7 | B_ARG_559 | NH1 | A_GLU_103 | OE2 | 3.895 |
| 6QD7 | B_ARG_559 | NH2 | A_GLU_103 | OE1 | 3.220 |
| 6QD7 | B_ARG_559 | NH2 | A_GLU_103 | OE2 | 3.089 |
| 6QD7 | B_ARG_587 | NH2 | B_GLU_578 | OE2 | 3.922 |
| 6QD7 | B_LYS_588 | NZ  | A_ASP_47  | OD2 | 3.517 |
| 6QD7 | B_HIS_602 | ND1 | F_GLU_611 | OE2 | 2.318 |
| 6QD7 | B_HIS_628 | ND1 | B_ASP_624 | OD1 | 3.831 |
| 6QD7 | B_HIS_628 | NE2 | B_ASP_624 | OD1 | 2.455 |
| 6QD7 | C_ARG_64  | NH2 | C_ASP_192 | OD1 | 3.858 |
| 6QD7 | C_ARG_85  | NH1 | C_GLU_178 | OE1 | 3.413 |
| 6QD7 | C_ARG_85  | NH1 | C_GLU_178 | OE2 | 3.024 |
| 6QD7 | C_LYS_114 | NZ  | C_GLU_120 | OE1 | 3.281 |
| 6QD7 | C_ARG_130 | NH2 | C_ASP_163 | OD1 | 3.286 |
| 6QD7 | C_ARG_134 | NH1 | D_GLU_545 | OE2 | 3.066 |
| 6QD7 | C_HIS_154 | ND1 | C_GLU_156 | OE1 | 3.400 |
| 6QD7 | C_HIS_154 | NE2 | C_GLU_178 | OE1 | 2.937 |
| 6QD7 | C_ARG_164 | NH1 | C_ASP_163 | OD1 | 3.711 |
| 6QD7 | C_ARG_164 | NH1 | C_ASP_163 | OD2 | 3.938 |

|      |           |     |           |     |       |
|------|-----------|-----|-----------|-----|-------|
| 6QD7 | E_ARG_64  | NH2 | E_ASP_192 | OD1 | 3.857 |
| 6QD7 | E_ARG_85  | NH1 | E_GLU_178 | OE1 | 3.413 |
| 6QD7 | E_ARG_85  | NH1 | E_GLU_178 | OE2 | 3.024 |
| 6QD7 | E_LYS_114 | NZ  | E_GLU_120 | OE1 | 3.279 |
| 6QD7 | E_ARG_130 | NH2 | E_ASP_163 | OD1 | 3.285 |
| 6QD7 | E_ARG_134 | NH1 | F_GLU_545 | OE2 | 2.931 |
| 6QD7 | E_HIS_154 | ND1 | E_GLU_156 | OE1 | 3.400 |
| 6QD7 | E_HIS_154 | NE2 | E_GLU_178 | OE1 | 2.937 |
| 6QD7 | E_ARG_164 | NH1 | E_ASP_163 | OD1 | 3.712 |
| 6QD7 | E_ARG_164 | NH1 | E_ASP_163 | OD2 | 3.939 |
| 6QD7 | D_ARG_559 | NH1 | C_GLU_103 | OE1 | 2.624 |
| 6QD7 | D_ARG_559 | NH1 | C_GLU_103 | OE2 | 3.858 |
| 6QD7 | D_ARG_559 | NH2 | C_GLU_103 | OE1 | 3.320 |
| 6QD7 | D_ARG_559 | NH2 | C_GLU_103 | OE2 | 3.132 |
| 6QD7 | D_ARG_587 | NH2 | D_GLU_578 | OE2 | 3.922 |
| 6QD7 | D_LYS_588 | NZ  | C_ASP_47  | OD2 | 3.598 |
| 6QD7 | D_HIS_602 | ND1 | B_GLU_611 | OE2 | 2.828 |
| 6QD7 | D_HIS_628 | ND1 | D_ASP_624 | OD1 | 3.831 |
| 6QD7 | D_HIS_628 | NE2 | D_ASP_624 | OD1 | 2.456 |
| 6QD7 | F_ARG_559 | NH1 | E_GLU_103 | OE1 | 2.462 |
| 6QD7 | F_ARG_559 | NH1 | E_GLU_103 | OE2 | 3.800 |
| 6QD7 | F_ARG_559 | NH2 | E_GLU_103 | OE1 | 3.090 |
| 6QD7 | F_ARG_559 | NH2 | E_GLU_103 | OE2 | 2.951 |
| 6QD7 | F_ARG_587 | NH2 | F_GLU_578 | OE2 | 3.922 |
| 6QD7 | F_LYS_588 | NZ  | E_ASP_47  | OD2 | 3.686 |
| 6QD7 | F_HIS_602 | ND1 | D_GLU_611 | OE2 | 2.771 |
| 6QD7 | F_HIS_628 | ND1 | F_ASP_624 | OD1 | 3.831 |
| 6QD7 | F_HIS_628 | NE2 | F_ASP_624 | OD1 | 2.455 |
| 6QD7 | X_ARG_38  | NH1 | X_ASP_87  | OD1 | 2.843 |
| 6QD7 | X_LYS_65  | NZ  | F_ASP_552 | OD1 | 3.082 |
| 6QD7 | X_LYS_65  | NZ  | F_ASP_552 | OD2 | 3.701 |
| 6QD7 | X_ARG_67  | NH1 | X_ASP_87  | OD1 | 3.876 |
| 6QD7 | X_ARG_67  | NH1 | X_ASP_87  | OD2 | 2.748 |
| 6QD7 | X_ARG_67  | NH2 | X_ASP_87  | OD1 | 3.604 |
| 6QD7 | X_ARG_67  | NH2 | X_ASP_87  | OD2 | 3.759 |
| 6QD7 | X_LYS_95  | NZ  | X_ASP_106 | OD1 | 2.959 |
| 6QD7 | X_LYS_95  | NZ  | X_ASP_106 | OD2 | 3.089 |
| 6QD7 | X_ARG_101 | NH1 | F_GLU_564 | OE1 | 3.893 |
| 6QD7 | X_ARG_101 | NH1 | F_GLU_564 | OE2 | 2.816 |
| 6QD7 | X_ARG_101 | NH2 | F_GLU_502 | OE1 | 3.631 |
| 6QD7 | X_ARG_101 | NH2 | F_GLU_502 | OE2 | 3.812 |
| 6QD7 | X_ARG_101 | NH2 | F_GLU_564 | OE1 | 3.108 |
| 6QD7 | X_ARG_101 | NH2 | F_GLU_564 | OE2 | 3.371 |
| 6QD7 | U_ARG_38  | NH1 | U_ASP_87  | OD1 | 2.842 |
| 6QD7 | U_LYS_65  | NZ  | B_ASP_552 | OD1 | 2.927 |
| 6QD7 | U_LYS_65  | NZ  | B_ASP_552 | OD2 | 3.579 |
| 6QD7 | U_ARG_67  | NH1 | U_ASP_87  | OD1 | 3.877 |
| 6QD7 | U_ARG_67  | NH1 | U_ASP_87  | OD2 | 2.749 |
| 6QD7 | U_ARG_67  | NH2 | U_ASP_87  | OD1 | 3.604 |
| 6QD7 | U_ARG_67  | NH2 | U_ASP_87  | OD2 | 3.760 |
| 6QD7 | U_LYS_95  | NZ  | U_ASP_106 | OD1 | 2.959 |
| 6QD7 | U_LYS_95  | NZ  | U_ASP_106 | OD2 | 3.089 |
| 6QD7 | U_ARG_101 | NH1 | B_GLU_564 | OE1 | 3.771 |
| 6QD7 | U_ARG_101 | NH1 | B_GLU_564 | OE2 | 2.902 |
| 6QD7 | U_ARG_101 | NH2 | B_GLU_502 | OE1 | 3.404 |
| 6QD7 | U_ARG_101 | NH2 | B_GLU_502 | OE2 | 3.473 |
| 6QD7 | U_ARG_101 | NH2 | B_GLU_564 | OE1 | 3.146 |
| 6QD7 | U_ARG_101 | NH2 | B_GLU_564 | OE2 | 3.609 |

|      |           |     |           |     |       |
|------|-----------|-----|-----------|-----|-------|
| 6QD7 | Z_ARG_45  | NH1 | Z_GLU_81  | OE2 | 3.706 |
| 6QD7 | Z_ARG_45  | NH2 | Z_GLU_81  | OE2 | 3.775 |
| 6QD7 | Z_ARG_61  | NH1 | Z_GLU_79  | OE1 | 3.427 |
| 6QD7 | Z_ARG_61  | NH1 | Z_GLU_79  | OE2 | 2.720 |
| 6QD7 | Z_ARG_61  | NH2 | Z_GLU_79  | OE1 | 3.521 |
| 6QD7 | Z_ARG_61  | NH2 | Z_GLU_81  | OE1 | 3.408 |
| 6QD7 | Z_ARG_61  | NH2 | Z_ASP_82  | OD1 | 3.494 |
| 6QD7 | Z_ARG_61  | NH2 | Z_ASP_82  | OD2 | 2.754 |
| 6QD7 | Z_ARG_91  | NH1 | F_GLU_502 | OE1 | 3.548 |
| 6QD7 | Z_ARG_91  | NH2 | Z_GLU_50  | OE1 | 3.368 |
| 6QD7 | P_ARG_45  | NH1 | P_GLU_81  | OE2 | 3.704 |
| 6QD7 | P_ARG_45  | NH2 | P_GLU_81  | OE2 | 3.711 |
| 6QD7 | P_ARG_61  | NH1 | P_GLU_79  | OE1 | 3.312 |
| 6QD7 | P_ARG_61  | NH1 | P_GLU_79  | OE2 | 2.568 |
| 6QD7 | P_ARG_61  | NH2 | P_GLU_79  | OE1 | 3.625 |
| 6QD7 | P_ARG_61  | NH2 | P_GLU_79  | OE2 | 3.928 |
| 6QD7 | P_ARG_61  | NH2 | P_GLU_81  | OE1 | 3.239 |
| 6QD7 | P_ARG_61  | NH2 | P_ASP_82  | OD1 | 2.611 |
| 6QD7 | P_ARG_61  | NH2 | P_ASP_82  | OD2 | 3.516 |
| 6QD7 | P_ARG_91  | NH1 | B_GLU_502 | OE1 | 3.467 |
| 6QD7 | P_ARG_91  | NH2 | P_GLU_50  | OE1 | 3.343 |
| 6QD8 | Z_LYS_39  | NZ  | Z_GLU_81  | OE2 | 3.248 |
| 6QD8 | Z_ARG_61  | NH2 | Z_ASP_82  | OD1 | 2.630 |
| 6QD8 | Z_ARG_61  | NH2 | Z_ASP_82  | OD2 | 3.110 |
| 6QD8 | Z_ARG_96  | NH1 | W_GLU_51  | OE1 | 3.187 |
| 6QD8 | Z_ARG_96  | NH1 | W_GLU_51  | OE2 | 3.722 |
| 6QD8 | A_ARG_64  | NH2 | B_ASP_522 | OD2 | 3.626 |
| 6QD8 | A_ARG_85  | NH1 | A_GLU_178 | OE1 | 3.877 |
| 6QD8 | A_ARG_85  | NH1 | A_GLU_178 | OE2 | 3.145 |
| 6QD8 | A_LYS_114 | NZ  | A_GLU_112 | OE2 | 2.626 |
| 6QD8 | A_LYS_114 | NZ  | A_GLU_120 | OE2 | 3.220 |
| 6QD8 | A_ARG_130 | NH2 | A_ASP_163 | OD1 | 3.061 |
| 6QD8 | A_ARG_134 | NH1 | B_GLU_545 | OE2 | 3.117 |
| 6QD8 | A_HIS_154 | NE2 | A_GLU_178 | OE1 | 2.431 |
| 6QD8 | A_ARG_266 | NH2 | A_ASP_237 | OD2 | 3.394 |
| 6QD8 | Y_LYS_39  | NZ  | Y_GLU_81  | OE2 | 3.248 |
| 6QD8 | Y_ARG_61  | NH2 | Y_ASP_82  | OD1 | 2.630 |
| 6QD8 | Y_ARG_61  | NH2 | Y_ASP_82  | OD2 | 3.109 |
| 6QD8 | Y_ARG_96  | NH1 | Q_GLU_51  | OE1 | 3.080 |
| 6QD8 | Y_ARG_96  | NH1 | Q_GLU_51  | OE2 | 3.529 |
| 6QD8 | B_ARG_559 | NH1 | A_GLU_103 | OE1 | 3.695 |
| 6QD8 | B_ARG_559 | NH1 | A_GLU_103 | OE2 | 2.598 |
| 6QD8 | B_ARG_559 | NH2 | A_GLU_103 | OE1 | 3.315 |
| 6QD8 | B_ARG_559 | NH2 | A_GLU_103 | OE2 | 3.288 |
| 6QD8 | B_HIS_602 | ND1 | F_GLU_611 | OE2 | 3.837 |
| 6QD8 | B_HIS_613 | NE2 | B_ASP_614 | OD2 | 3.771 |
| 6QD8 | L_LYS_39  | NZ  | L_GLU_81  | OE2 | 3.248 |
| 6QD8 | L_ARG_61  | NH2 | L_ASP_82  | OD1 | 2.630 |
| 6QD8 | L_ARG_61  | NH2 | L_ASP_82  | OD2 | 3.110 |
| 6QD8 | L_ARG_96  | NH1 | H_GLU_51  | OE1 | 3.060 |
| 6QD8 | L_ARG_96  | NH1 | H_GLU_51  | OE2 | 3.554 |
| 6QD8 | H_ARG_44  | NH2 | H_GLU_47  | OE1 | 3.870 |
| 6QD8 | H_ARG_55  | NH1 | B_GLU_564 | OE1 | 2.303 |
| 6QD8 | H_ARG_55  | NH1 | B_GLU_564 | OE2 | 3.666 |
| 6QD8 | H_LYS_76  | NZ  | H_ASP_73  | OD2 | 2.834 |
| 6QD8 | C_ARG_64  | NH2 | D_ASP_522 | OD2 | 3.747 |
| 6QD8 | C_ARG_85  | NH1 | C_GLU_178 | OE1 | 3.878 |
| 6QD8 | C_ARG_85  | NH1 | C_GLU_178 | OE2 | 3.144 |

|      |           |     |           |     |       |
|------|-----------|-----|-----------|-----|-------|
| 6QD8 | C_LYS.114 | NZ  | C_GLU.112 | OE2 | 2.626 |
| 6QD8 | C_LYS.114 | NZ  | C_GLU.120 | OE2 | 3.220 |
| 6QD8 | C_ARG.130 | NH2 | C_ASP.163 | OD1 | 3.061 |
| 6QD8 | C_ARG.134 | NH1 | D_GLU.545 | OE2 | 2.972 |
| 6QD8 | C_HIS.154 | NE2 | C_GLU.178 | OE1 | 2.430 |
| 6QD8 | C_ARG.266 | NH2 | C_ASP.237 | OD2 | 3.393 |
| 6QD8 | E_ARG.64  | NH2 | F_ASP.522 | OD2 | 3.901 |
| 6QD8 | E_ARG.85  | NH1 | E_GLU.178 | OE1 | 3.877 |
| 6QD8 | E_ARG.85  | NH1 | E_GLU.178 | OE2 | 3.145 |
| 6QD8 | E_LYS.114 | NZ  | E_GLU.112 | OE2 | 2.626 |
| 6QD8 | E_LYS.114 | NZ  | E_GLU.120 | OE2 | 3.220 |
| 6QD8 | E_ARG.130 | NH2 | E_ASP.163 | OD1 | 3.061 |
| 6QD8 | E_ARG.134 | NH1 | F_GLU.545 | OE2 | 2.891 |
| 6QD8 | E_HIS.154 | NE2 | E_GLU.178 | OE1 | 2.431 |
| 6QD8 | E_ARG.266 | NH2 | E_ASP.237 | OD2 | 3.393 |
| 6QD8 | F_ARG.559 | NH1 | E_GLU.103 | OE1 | 3.653 |
| 6QD8 | F_ARG.559 | NH1 | E_GLU.103 | OE2 | 2.383 |
| 6QD8 | F_ARG.559 | NH2 | E_GLU.103 | OE1 | 3.116 |
| 6QD8 | F_ARG.559 | NH2 | E_GLU.103 | OE2 | 2.960 |
| 6QD8 | F_HIS.602 | ND1 | D_GLU.611 | OE2 | 3.980 |
| 6QD8 | F_HIS.613 | NE2 | F_ASP.614 | OD2 | 3.772 |
| 6QD8 | D_ARG.559 | NH1 | C_GLU.103 | OE1 | 3.634 |
| 6QD8 | D_ARG.559 | NH1 | C_GLU.103 | OE2 | 2.515 |
| 6QD8 | D_ARG.559 | NH2 | C_GLU.103 | OE1 | 3.283 |
| 6QD8 | D_ARG.559 | NH2 | C_GLU.103 | OE2 | 3.254 |
| 6QD8 | D_HIS.602 | ND1 | B_GLU.611 | OE2 | 3.920 |
| 6QD8 | D_HIS.613 | NE2 | D_ASP.614 | OD2 | 3.772 |
| 6QD8 | W_ARG.44  | NH2 | W_GLU.47  | OE1 | 3.870 |
| 6QD8 | W_ARG.55  | NH1 | F_GLU.564 | OE1 | 2.296 |
| 6QD8 | W_ARG.55  | NH1 | F_GLU.564 | OE2 | 3.607 |
| 6QD8 | W_LYS.76  | NZ  | W_ASP.73  | OD2 | 2.835 |
| 6QD8 | Q_ARG.44  | NH2 | Q_GLU.47  | OE1 | 3.871 |
| 6QD8 | Q_ARG.55  | NH1 | D_GLU.564 | OE1 | 2.265 |
| 6QD8 | Q_ARG.55  | NH1 | D_GLU.564 | OE2 | 3.539 |
| 6QD8 | Q_LYS.76  | NZ  | Q_ASP.73  | OD2 | 2.836 |
| 6S8D | L_LYS.109 | NZ  | L_ASP.88  | OD1 | 3.182 |
| 6S8D | H_ARG.30  | NH2 | P_ASP.104 | OD2 | 3.844 |
| 6S8D | H_ARG.38  | NH1 | H_ASP.92  | OD1 | 2.379 |
| 6S8D | H_LYS.78  | NZ  | H_ASP.75  | OD1 | 3.645 |
| 6S8D | H_LYS.78  | NZ  | H_ASP.75  | OD2 | 2.608 |
| 6S8D | A_ARG.85  | NH1 | A_GLU.178 | OE1 | 3.862 |
| 6S8D | A_ARG.85  | NH1 | A_GLU.178 | OE2 | 3.009 |
| 6S8D | A_ARG.130 | NH2 | A_ASP.163 | OD2 | 3.703 |
| 6S8D | A_ARG.136 | NH1 | A_GLU.106 | OE2 | 3.841 |
| 6S8D | A_HIS.154 | NE2 | A_GLU.178 | OE1 | 2.356 |
| 6S8D | A_ARG.164 | NH1 | A_ASP.163 | OD2 | 3.715 |
| 6S8D | B_ARG.559 | NH1 | A_GLU.103 | OE1 | 3.375 |
| 6S8D | B_ARG.559 | NH1 | A_GLU.103 | OE2 | 3.357 |
| 6S8D | B_ARG.559 | NH2 | A_GLU.103 | OE1 | 3.329 |
| 6S8D | B_ARG.587 | NH2 | B_GLU.578 | OE1 | 3.148 |
| 6S8D | B_ARG.596 | NH2 | A_ASP.55  | OD2 | 3.730 |
| 6S8D | D_ARG.559 | NH1 | C_GLU.103 | OE1 | 3.344 |
| 6S8D | D_ARG.559 | NH1 | C_GLU.103 | OE2 | 3.304 |
| 6S8D | D_ARG.559 | NH2 | C_GLU.103 | OE1 | 3.261 |
| 6S8D | D_ARG.559 | NH2 | C_GLU.103 | OE2 | 3.986 |
| 6S8D | D_ARG.587 | NH2 | D_GLU.578 | OE1 | 3.148 |
| 6S8D | D_ARG.596 | NH2 | C_ASP.55  | OD2 | 3.794 |
| 6S8D | F_ARG.559 | NH1 | E_GLU.103 | OE1 | 3.445 |

|      |           |     |           |     |       |
|------|-----------|-----|-----------|-----|-------|
| 6S8D | F_ARG.559 | NH1 | E_GLU.103 | OE2 | 3.366 |
| 6S8D | F_ARG.559 | NH2 | E_GLU.103 | OE1 | 3.372 |
| 6S8D | F_ARG.587 | NH2 | F_GLU.578 | OE1 | 3.148 |
| 6S8D | F_ARG.596 | NH2 | E_ASP.55  | OD2 | 3.605 |
| 6S8D | O_LYS.109 | NZ  | O_ASP.88  | OD1 | 3.182 |
| 6S8D | U_LYS.109 | NZ  | U_ASP.88  | OD1 | 3.181 |
| 6S8D | C_ARG.85  | NH1 | C_GLU.178 | OE1 | 3.862 |
| 6S8D | C_ARG.85  | NH1 | C_GLU.178 | OE2 | 3.008 |
| 6S8D | C_ARG.130 | NH2 | C_ASP.163 | OD2 | 3.703 |
| 6S8D | C_ARG.136 | NH1 | C_GLU.106 | OE2 | 3.842 |
| 6S8D | C_HIS.154 | NE2 | C_GLU.178 | OE1 | 2.356 |
| 6S8D | C_ARG.164 | NH1 | C_ASP.163 | OD2 | 3.715 |
| 6S8D | E_ARG.85  | NH1 | E_GLU.178 | OE1 | 3.862 |
| 6S8D | E_ARG.85  | NH1 | E_GLU.178 | OE2 | 3.008 |
| 6S8D | E_LYS.114 | NZ  | Y_ASP.56  | OD2 | 3.842 |
| 6S8D | E_ARG.130 | NH2 | E_ASP.163 | OD2 | 3.703 |
| 6S8D | E_ARG.136 | NH1 | E_GLU.106 | OE2 | 3.841 |
| 6S8D | E_HIS.154 | NE2 | E_GLU.178 | OE1 | 2.357 |
| 6S8D | E_ARG.164 | NH1 | E_ASP.163 | OD2 | 3.715 |
| 6S8D | P_ARG.30  | NH2 | Y_ASP.104 | OD2 | 3.808 |
| 6S8D | P_ARG.38  | NH1 | P_ASP.92  | OD1 | 2.379 |
| 6S8D | P_LYS.78  | NZ  | P_ASP.75  | OD1 | 3.644 |
| 6S8D | P_LYS.78  | NZ  | P_ASP.75  | OD2 | 2.608 |
| 6S8D | Y_ARG.30  | NH2 | H_ASP.104 | OD2 | 3.626 |
| 6S8D | Y_ARG.38  | NH1 | Y_ASP.92  | OD1 | 2.379 |
| 6S8D | Y_LYS.78  | NZ  | Y_ASP.75  | OD1 | 3.645 |
| 6S8D | Y_LYS.78  | NZ  | Y_ASP.75  | OD2 | 2.608 |
| 6S8I | L_ARG.57  | NH1 | L_ASP.63  | OD1 | 3.936 |
| 6S8I | L_ARG.57  | NH2 | L_ASP.63  | OD2 | 3.681 |
| 6S8I | L_ARG.64  | NH2 | L_ASP.85  | OD1 | 3.247 |
| 6S8I | L_LYS.109 | NZ  | L_ASP.88  | OD1 | 3.092 |
| 6S8I | L_LYS.109 | NZ  | L_ASP.88  | OD2 | 3.761 |
| 6S8I | H_ARG.38  | NH1 | H_ASP.92  | OD1 | 3.736 |
| 6S8I | H_ARG.50  | NH2 | H_GLU.61  | OE1 | 3.922 |
| 6S8I | H_ARG.67  | NH2 | H_GLU.61  | OE2 | 3.135 |
| 6S8I | H_ARG.69  | NH2 | H_ASP.92  | OD1 | 2.684 |
| 6S8I | H_ARG.78  | NH1 | H_ASP.75  | OD2 | 3.325 |
| 6S8I | H_ARG.105 | NH1 | L_GLU.102 | OE1 | 3.601 |
| 6S8I | H_ARG.105 | NH1 | L_GLU.102 | OE2 | 3.239 |
| 6S8I | H_ARG.105 | NH2 | L_GLU.102 | OE2 | 2.950 |
| 6S8I | A_ARG.85  | NH1 | A_GLU.178 | OE1 | 3.349 |
| 6S8I | A_ARG.85  | NH1 | A_GLU.178 | OE2 | 2.593 |
| 6S8I | A_LYS.114 | NZ  | H_ASP.56  | OD1 | 2.454 |
| 6S8I | A_LYS.114 | NZ  | H_ASP.56  | OD2 | 2.783 |
| 6S8I | A_LYS.114 | NZ  | A_GLU.120 | OE2 | 3.868 |
| 6S8I | A_ARG.134 | NH1 | B_GLU.545 | OE2 | 3.078 |
| 6S8I | A_ARG.136 | NH1 | A_GLU.106 | OE2 | 3.794 |
| 6S8I | A_LYS.140 | NZ  | A_GLU.112 | OE2 | 3.972 |
| 6S8I | A_HIS.154 | NE2 | A_GLU.178 | OE1 | 2.780 |
| 6S8I | A_ARG.164 | NH1 | A_ASP.163 | OD1 | 3.922 |
| 6S8I | A_ARG.164 | NH1 | A_ASP.163 | OD2 | 3.313 |
| 6S8I | B_ARG.559 | NH1 | A_GLU.103 | OE1 | 3.895 |
| 6S8I | B_ARG.559 | NH1 | A_GLU.103 | OE2 | 3.783 |
| 6S8I | B_ARG.559 | NH2 | A_GLU.103 | OE1 | 3.282 |
| 6S8I | B_ARG.559 | NH2 | A_GLU.103 | OE2 | 3.928 |
| 6S8I | B_ARG.596 | NH2 | A_ASP.55  | OD1 | 3.671 |
| 6S8I | D_ARG.559 | NH1 | C_GLU.103 | OE1 | 3.877 |
| 6S8I | D_ARG.559 | NH1 | C_GLU.103 | OE2 | 3.822 |

|      |           |     |           |     |       |
|------|-----------|-----|-----------|-----|-------|
| 6S8I | D_ARG_559 | NH2 | C_GLU_103 | OE1 | 3.248 |
| 6S8I | D_ARG_559 | NH2 | C_GLU_103 | OE2 | 3.953 |
| 6S8I | D_ARG_596 | NH2 | C_ASP_55  | OD1 | 3.743 |
| 6S8I | F_ARG_559 | NH1 | E_GLU_103 | OE1 | 3.975 |
| 6S8I | F_ARG_559 | NH1 | E_GLU_103 | OE2 | 3.796 |
| 6S8I | F_ARG_559 | NH2 | E_GLU_103 | OE1 | 3.335 |
| 6S8I | F_ARG_559 | NH2 | E_GLU_103 | OE2 | 3.908 |
| 6S8I | F_ARG_596 | NH2 | E_ASP_55  | OD1 | 3.553 |
| 6S8I | C_ARG_85  | NH1 | C_GLU_178 | OE1 | 3.349 |
| 6S8I | C_ARG_85  | NH1 | C_GLU_178 | OE2 | 2.593 |
| 6S8I | C_LYS_114 | NZ  | C_GLU_120 | OE2 | 3.868 |
| 6S8I | C_LYS_114 | NZ  | P_ASP_56  | OD1 | 2.515 |
| 6S8I | C_LYS_114 | NZ  | P_ASP_56  | OD2 | 2.783 |
| 6S8I | C_ARG_134 | NH1 | D_GLU_545 | OE2 | 3.135 |
| 6S8I | C_ARG_136 | NH1 | C_GLU_106 | OE2 | 3.793 |
| 6S8I | C_LYS_140 | NZ  | C_GLU_112 | OE2 | 3.972 |
| 6S8I | C_HIS_154 | NE2 | C_GLU_178 | OE1 | 2.781 |
| 6S8I | C_ARG_164 | NH1 | C_ASP_163 | OD1 | 3.921 |
| 6S8I | C_ARG_164 | NH1 | C_ASP_163 | OD2 | 3.312 |
| 6S8I | E_ARG_85  | NH1 | E_GLU_178 | OE1 | 3.349 |
| 6S8I | E_ARG_85  | NH1 | E_GLU_178 | OE2 | 2.594 |
| 6S8I | E_LYS_114 | NZ  | E_GLU_120 | OE2 | 3.868 |
| 6S8I | E_LYS_114 | NZ  | Y_ASP_56  | OD1 | 2.476 |
| 6S8I | E_LYS_114 | NZ  | Y_ASP_56  | OD2 | 2.735 |
| 6S8I | E_ARG_134 | NH1 | F_GLU_545 | OE2 | 3.154 |
| 6S8I | E_ARG_136 | NH1 | E_GLU_106 | OE2 | 3.794 |
| 6S8I | E_LYS_140 | NZ  | E_GLU_112 | OE2 | 3.972 |
| 6S8I | E_HIS_154 | NE2 | E_GLU_178 | OE1 | 2.779 |
| 6S8I | E_ARG_164 | NH1 | E_ASP_163 | OD1 | 3.921 |
| 6S8I | E_ARG_164 | NH1 | E_ASP_163 | OD2 | 3.313 |
| 6S8I | O_ARG_57  | NH1 | O_ASP_63  | OD1 | 3.936 |
| 6S8I | O_ARG_57  | NH2 | O_ASP_63  | OD2 | 3.681 |
| 6S8I | O_ARG_64  | NH2 | O_ASP_85  | OD1 | 3.246 |
| 6S8I | O_LYS_109 | NZ  | O_ASP_88  | OD1 | 3.092 |
| 6S8I | O_LYS_109 | NZ  | O_ASP_88  | OD2 | 3.761 |
| 6S8I | U_ARG_57  | NH1 | U_ASP_63  | OD1 | 3.937 |
| 6S8I | U_ARG_57  | NH2 | U_ASP_63  | OD2 | 3.681 |
| 6S8I | U_ARG_64  | NH2 | U_ASP_85  | OD1 | 3.247 |
| 6S8I | U_LYS_109 | NZ  | U_ASP_88  | OD1 | 3.092 |
| 6S8I | U_LYS_109 | NZ  | U_ASP_88  | OD2 | 3.761 |
| 6S8I | P_ARG_38  | NH1 | P_ASP_92  | OD1 | 3.736 |
| 6S8I | P_ARG_50  | NH2 | P_GLU_61  | OE1 | 3.922 |
| 6S8I | P_ARG_67  | NH2 | P_GLU_61  | OE2 | 3.135 |
| 6S8I | P_ARG_69  | NH2 | P_ASP_92  | OD1 | 2.683 |
| 6S8I | P_ARG_78  | NH1 | P_ASP_75  | OD2 | 3.324 |
| 6S8I | P_ARG_105 | NH1 | O_GLU_102 | OE1 | 3.789 |
| 6S8I | P_ARG_105 | NH1 | O_GLU_102 | OE2 | 3.289 |
| 6S8I | P_ARG_105 | NH2 | O_GLU_102 | OE2 | 3.143 |
| 6S8I | Y_ARG_38  | NH1 | Y_ASP_92  | OD1 | 3.736 |
| 6S8I | Y_ARG_50  | NH2 | Y_GLU_61  | OE1 | 3.922 |
| 6S8I | Y_ARG_67  | NH2 | Y_GLU_61  | OE2 | 3.135 |
| 6S8I | Y_ARG_69  | NH2 | Y_ASP_92  | OD1 | 2.683 |
| 6S8I | Y_ARG_78  | NH1 | Y_ASP_75  | OD2 | 3.325 |
| 6S8I | Y_ARG_105 | NH1 | U_GLU_102 | OE1 | 3.606 |
| 6S8I | Y_ARG_105 | NH1 | U_GLU_102 | OE2 | 3.273 |
| 6S8I | Y_ARG_105 | NH2 | U_GLU_102 | OE2 | 2.978 |
| 6S8J | L_ARG_57  | NH1 | L_ASP_63  | OD1 | 3.597 |
| 6S8J | L_ARG_57  | NH2 | L_ASP_63  | OD2 | 3.474 |

|      |           |     |           |     |       |
|------|-----------|-----|-----------|-----|-------|
| 6S8J | L_ARG_64  | NH2 | L_ASP_85  | OD1 | 3.929 |
| 6S8J | L_LYS_109 | NZ  | L_ASP_88  | OD1 | 2.806 |
| 6S8J | L_LYS_109 | NZ  | L_ASP_88  | OD2 | 3.179 |
| 6S8J | H_ARG_38  | NH2 | H_GLU_46  | OE1 | 3.358 |
| 6S8J | H_ARG_69  | NH1 | H_ASP_92  | OD1 | 3.693 |
| 6S8J | H_ARG_69  | NH2 | H_ASP_92  | OD1 | 3.149 |
| 6S8J | H_ARG_69  | NH2 | H_ASP_92  | OD2 | 3.494 |
| 6S8J | H_ARG_74  | NH1 | H_ASP_76  | OD1 | 3.838 |
| 6S8J | H_ARG_74  | NH1 | H_ASP_76  | OD2 | 3.202 |
| 6S8J | A_ARG_85  | NH1 | A_GLU_178 | OE1 | 3.872 |
| 6S8J | A_ARG_85  | NH1 | A_GLU_178 | OE2 | 2.923 |
| 6S8J | A_LYS_114 | NZ  | H_ASP_56  | OD1 | 3.168 |
| 6S8J | A_LYS_114 | NZ  | H_ASP_56  | OD2 | 2.312 |
| 6S8J | A_LYS_114 | NZ  | A_GLU_120 | OE2 | 3.844 |
| 6S8J | A_ARG_134 | NH1 | B_GLU_545 | OE2 | 2.814 |
| 6S8J | A_ARG_136 | NH1 | A_GLU_106 | OE2 | 3.658 |
| 6S8J | A_HIS_154 | NE2 | A_GLU_178 | OE1 | 2.462 |
| 6S8J | A_ARG_164 | NH1 | A_ASP_163 | OD2 | 3.447 |
| 6S8J | B_ARG_559 | NH1 | A_GLU_103 | OE1 | 3.955 |
| 6S8J | B_ARG_559 | NH1 | A_GLU_103 | OE2 | 3.604 |
| 6S8J | B_ARG_559 | NH2 | A_GLU_103 | OE1 | 3.443 |
| 6S8J | B_ARG_559 | NH2 | A_GLU_103 | OE2 | 3.830 |
| 6S8J | B_ARG_596 | NH2 | A_ASP_55  | OD1 | 2.986 |
| 6S8J | B_ARG_596 | NH2 | A_ASP_55  | OD2 | 3.529 |
| 6S8J | O_ARG_57  | NH1 | O_ASP_63  | OD1 | 3.597 |
| 6S8J | O_ARG_57  | NH2 | O_ASP_63  | OD2 | 3.473 |
| 6S8J | O_ARG_64  | NH2 | O_ASP_85  | OD1 | 3.931 |
| 6S8J | O_LYS_109 | NZ  | O_ASP_88  | OD1 | 2.805 |
| 6S8J | O_LYS_109 | NZ  | O_ASP_88  | OD2 | 3.179 |
| 6S8J | U_ARG_57  | NH1 | U_ASP_63  | OD1 | 3.597 |
| 6S8J | U_ARG_57  | NH2 | U_ASP_63  | OD2 | 3.473 |
| 6S8J | U_ARG_64  | NH2 | U_ASP_85  | OD1 | 3.930 |
| 6S8J | U_LYS_109 | NZ  | U_ASP_88  | OD1 | 2.806 |
| 6S8J | U_LYS_109 | NZ  | U_ASP_88  | OD2 | 3.179 |
| 6S8J | D_ARG_559 | NH1 | C_GLU_103 | OE1 | 3.872 |
| 6S8J | D_ARG_559 | NH1 | C_GLU_103 | OE2 | 3.635 |
| 6S8J | D_ARG_559 | NH2 | C_GLU_103 | OE1 | 3.272 |
| 6S8J | D_ARG_559 | NH2 | C_GLU_103 | OE2 | 3.792 |
| 6S8J | D_ARG_596 | NH2 | C_ASP_55  | OD1 | 2.928 |
| 6S8J | D_ARG_596 | NH2 | C_ASP_55  | OD2 | 3.762 |
| 6S8J | D_HIS_602 | ND1 | B_GLU_611 | OE1 | 3.866 |
| 6S8J | D_HIS_602 | NE2 | B_GLU_611 | OE1 | 3.805 |
| 6S8J | D_HIS_602 | NE2 | B_GLU_611 | OE2 | 3.737 |
| 6S8J | F_ARG_559 | NH1 | E_GLU_103 | OE1 | 3.993 |
| 6S8J | F_ARG_559 | NH1 | E_GLU_103 | OE2 | 3.748 |
| 6S8J | F_ARG_559 | NH2 | E_GLU_103 | OE1 | 3.468 |
| 6S8J | F_ARG_559 | NH2 | E_GLU_103 | OE2 | 3.952 |
| 6S8J | F_ARG_596 | NH2 | E_ASP_55  | OD1 | 2.985 |
| 6S8J | F_ARG_596 | NH2 | E_ASP_55  | OD2 | 3.707 |
| 6S8J | F_HIS_602 | ND1 | D_GLU_611 | OE1 | 3.880 |
| 6S8J | F_HIS_602 | NE2 | D_GLU_611 | OE2 | 3.765 |
| 6S8J | C_ARG_85  | NH1 | C_GLU_178 | OE1 | 3.872 |
| 6S8J | C_ARG_85  | NH1 | C_GLU_178 | OE2 | 2.922 |
| 6S8J | C_LYS_114 | NZ  | C_GLU_120 | OE2 | 3.844 |
| 6S8J | C_LYS_114 | NZ  | P_ASP_56  | OD1 | 3.173 |
| 6S8J | C_LYS_114 | NZ  | P_ASP_56  | OD2 | 2.252 |
| 6S8J | C_ARG_134 | NH1 | D_GLU_545 | OE2 | 2.837 |
| 6S8J | C_ARG_136 | NH1 | C_GLU_106 | OE2 | 3.658 |

|      |           |     |           |     |       |
|------|-----------|-----|-----------|-----|-------|
| 6S8J | C_HIS_154 | NE2 | C_GLU_178 | OE1 | 2.463 |
| 6S8J | C_ARG_164 | NH1 | C_ASP_163 | OD2 | 3.447 |
| 6S8J | E_ARG_85  | NH1 | E_GLU_178 | OE1 | 3.872 |
| 6S8J | E_ARG_85  | NH1 | E_GLU_178 | OE2 | 2.923 |
| 6S8J | E_LYS_114 | NZ  | E_GLU_120 | OE2 | 3.844 |
| 6S8J | E_LYS_114 | NZ  | Y_ASP_56  | OD1 | 3.177 |
| 6S8J | E_LYS_114 | NZ  | Y_ASP_56  | OD2 | 2.185 |
| 6S8J | E_ARG_134 | NH1 | F_GLU_545 | OE2 | 2.997 |
| 6S8J | E_ARG_136 | NH1 | E_GLU_106 | OE2 | 3.659 |
| 6S8J | E_HIS_154 | NE2 | E_GLU_178 | OE1 | 2.462 |
| 6S8J | E_ARG_164 | NH1 | E_ASP_163 | OD2 | 3.447 |
| 6S8J | P_ARG_38  | NH2 | P_GLU_46  | OE1 | 3.357 |
| 6S8J | P_ARG_69  | NH1 | P_ASP_92  | OD1 | 3.693 |
| 6S8J | P_ARG_69  | NH2 | P_ASP_92  | OD1 | 3.150 |
| 6S8J | P_ARG_69  | NH2 | P_ASP_92  | OD2 | 3.494 |
| 6S8J | P_ARG_74  | NH1 | P_ASP_76  | OD1 | 3.838 |
| 6S8J | P_ARG_74  | NH1 | P_ASP_76  | OD2 | 3.202 |
| 6S8J | Y_ARG_38  | NH2 | Y_GLU_46  | OE1 | 3.357 |
| 6S8J | Y_ARG_69  | NH1 | Y_ASP_92  | OD1 | 3.693 |
| 6S8J | Y_ARG_69  | NH2 | Y_ASP_92  | OD1 | 3.150 |
| 6S8J | Y_ARG_69  | NH2 | Y_ASP_92  | OD2 | 3.494 |
| 6S8J | Y_ARG_74  | NH1 | Y_ASP_76  | OD1 | 3.838 |
| 6S8J | Y_ARG_74  | NH1 | Y_ASP_76  | OD2 | 3.202 |

Table 1: Salt bridging networks within the PDB entries. In this table, the residue naming scheme is **Chain ID\_residue name\_residue number**.

| Count | Residue A | Residue B |
|-------|-----------|-----------|
| 191   | ARG559    | GLU103    |
| 122   | ARG85     | GLU178    |
| 86    | ARG164    | ASP163    |
| 83    | ARG61     | ASP82     |
| 59    | ARG38     | GLU46     |
| 53    | ARG66     | ASP86     |
| 50    | HIS154    | GLU178    |
| 49    | ARG130    | ASP163    |
| 42    | LYS114    | GLU120    |
| 38    | ARG38     | ASP86     |
| 32    | HIS516    | GLU545    |
| 31    | ARG61     | GLU81     |
| 27    | HIS39     | ASP55     |
| 23    | LYS588    | ASP47     |
| 22    | ARG134    | GLU545    |
| 21    | ARG94     | ASP101    |
| 20    | ARG136    | GLU106    |
| 20    | LYS24     | ASP70     |
| 19    | ARG64     | GLU100    |
| 19    | ARG69     | ASP92     |
| 17    | HIS602    | GLU611    |
| 16    | ARG98     | ASP100F   |
| 16    | ARG33     | GLU95     |
| 16    | ARG67     | ASP90     |
| 15    | ARG172    | GLU120    |
| 15    | LYS109    | ASP88     |
| 15    | ARG266    | ASP237    |
| 15    | ARG596    | ASP55     |
| 15    | LYS221    | GLU123    |
| 13    | LYS145    | ASP146    |
| 13    | LYS114    | ASP56     |
| 13    | ARG247    | GLU245    |
| 12    | LYS3      | ASP1      |
| 12    | HIS189    | ASP151    |
| 12    | LYS107    | GLU17     |
| 12    | ARG101    | GLU564    |
| 12    | LYS510    | GLU292    |
| 12    | ARG57     | ASP63     |
| 12    | ARG67     | ASP87     |
| 12    | ARG164    | GLU100    |
| 11    | ARG38     | ASP92     |
| 11    | ARG61     | GLU79     |
| 10    | ARG219    | GLU235    |
| 9     | ARG105    | GLU102    |
| 9     | ARG74     | ASP76     |
| 9     | LYS78     | ASP75     |
| 9     | HIS96     | GLU55     |
| 9     | LYS272    | ASP54     |
| 9     | LYS149    | GLU195    |
| 9     | ARG107    | GLU105    |
| 9     | LYS140    | GLU112    |
| 8     | ARG106    | ASP56     |
| 8     | ARG172    | GLU112    |
| 8     | ARG64     | GLU46     |
| 8     | ARG299    | GLU304    |
| 7     | ARG54     | ASP60     |
| 7     | LYS272    | ASP56     |

|   |        |        |
|---|--------|--------|
| 7 | ARG75  | ASP72  |
| 7 | HIS112 | GLU77  |
| 6 | ARG55  | GLU564 |
| 6 | ARG3   | ASP1   |
| 6 | ARG64  | ASP85  |
| 6 | LYS64  | GLU61  |
| 6 | LYS95  | ASP106 |
| 6 | ARG24  | GLU70  |
| 6 | HIS127 | ASP128 |
| 6 | ARG587 | GLU578 |
| 6 | ARG71  | ASP73  |
| 6 | ARG101 | GLU502 |
| 6 | LYS105 | GLU167 |
| 6 | LYS65  | ASP552 |
| 6 | ARG96  | GLU51  |
| 6 | LYS114 | GLU112 |
| 6 | HIS628 | ASP624 |
| 6 | ARG83  | GLU85  |
| 6 | ARG596 | ASP607 |
| 5 | LYS510 | GLU55  |
| 5 | LYS116 | ASP120 |
| 5 | ARG302 | GLU258 |
| 5 | HIS613 | ASP614 |
| 5 | ARG65  | GLU83  |
| 5 | ARG45  | GLU81  |
| 5 | HIS628 | ASP629 |
| 5 | LYS71  | ASP55  |
| 5 | HIS173 | ASP166 |
| 5 | ARG302 | GLU304 |
| 4 | LYS57  | ASP55  |
| 4 | ARG155 | GLU185 |
| 4 | LYS188 | ASP185 |
| 4 | LYS209 | GLU123 |
| 4 | ARG94  | ASP96  |
| 4 | LYS26  | GLU21  |
| 4 | LYS146 | GLU109 |
| 4 | LYS187 | GLU191 |
| 4 | LYS222 | GLU226 |
| 4 | ARG103 | GLU105 |
| 4 | ARG142 | GLU165 |
| 4 | LYS161 | ASP162 |
| 4 | ARG24  | ASP70  |
| 4 | HIS108 | ASP50  |
| 4 | HIS100 | GLU55  |
| 4 | LYS12  | GLU10  |
| 4 | ARG65  | GLU85  |
| 4 | ARG142 | GLU105 |
| 4 | ARG247 | ASP282 |
| 4 | LYS87  | ASP106 |
| 4 | LYS510 | GLU56  |
| 4 | LYS71  | ASP56  |
| 4 | HIS613 | GLU578 |
| 4 | LYS38  | GLU46  |
| 4 | ARG65  | ASP86  |
| 4 | LYS83  | ASP85  |
| 4 | LYS74  | ASP56  |
| 4 | ARG299 | GLU305 |
| 3 | ARG64  | ASP192 |

|   |         |        |
|---|---------|--------|
| 3 | HIS154  | GLU156 |
| 3 | HIS441  | ASP496 |
| 3 | ARG91   | GLU502 |
| 3 | LYS151  | GLU197 |
| 3 | LYS39   | ASP81  |
| 3 | ARG64   | ASP522 |
| 3 | ARG38   | ASP90  |
| 3 | LYS617  | ASP614 |
| 3 | LYS102  | GLU164 |
| 3 | ARG30   | ASP104 |
| 3 | LYS276  | GLU245 |
| 3 | LYS633  | ASP642 |
| 3 | ARG100  | GLU50  |
| 3 | ARG50   | ASP61  |
| 3 | ARG38   | ASP87  |
| 3 | ARG52   | GLU50  |
| 3 | ARG67   | GLU61  |
| 3 | LYS39   | GLU81  |
| 3 | ARG79   | ASP113 |
| 3 | HIS172  | ASP167 |
| 3 | ARG78   | ASP75  |
| 3 | ARG130  | GLU540 |
| 3 | ARG91   | GLU50  |
| 3 | LYS272  | GLU235 |
| 3 | ARG44   | GLU47  |
| 3 | LYS148  | GLU194 |
| 3 | ARG50   | GLU61  |
| 3 | LYS76   | ASP73  |
| 3 | LYS14   | GLU10  |
| 2 | ARG410  | ASP414 |
| 2 | HIS164  | GLU168 |
| 2 | LYS62   | ASP1   |
| 2 | HIS193  | ASP155 |
| 2 | LYS203  | ASP114 |
| 2 | LYS227  | GLU125 |
| 2 | LYS204  | ASP130 |
| 2 | LYS103  | GLU105 |
| 2 | LYS153  | GLU199 |
| 2 | ARG404  | GLU606 |
| 2 | HIS138  | ASP136 |
| 2 | LYS43   | GLU46  |
| 2 | LYS50   | ASP49  |
| 2 | LYS622  | ASP621 |
| 2 | LYS84   | GLU61  |
| 2 | LYS39   | GLU42  |
| 2 | LYS128  | GLU125 |
| 2 | ARG98   | GLU44  |
| 2 | ARG207  | GLU88  |
| 2 | ARG1059 | GLU391 |
| 2 | LYS228  | GLU230 |
| 2 | LYS210  | GLU212 |
| 2 | LYS103  | ASP85  |
| 2 | ARG79   | GLU110 |
| 2 | HIS125  | ASP159 |
| 2 | HIS69   | ASP124 |
| 2 | LYS208  | GLU127 |
| 2 | LYS208  | GLU124 |
| 2 | ARG32   | GLU212 |

|   |         |         |
|---|---------|---------|
| 2 | LYS214  | GLU123  |
| 2 | LYS19   | ASP81   |
| 2 | LYS75   | GLU72   |
| 2 | LYS107  | ASP169  |
| 2 | LYS149  | GLU203  |
| 2 | ARG1059 | GLU1089 |
| 2 | LYS53   | ASP31   |
| 2 | HIS549  | ASP52   |
| 2 | LYS107  | GLU109  |
| 2 | ARG159  | GLU189  |
| 1 | ARG50   | GLU116  |
| 1 | HIS1170 | GLU1166 |
| 1 | ARG39   | ASP82   |
| 1 | HIS407  | ASP92   |
| 1 | ARG607  | ASP611  |
| 1 | LYS7    | GLU9    |
| 1 | ARG389  | GLU393  |
| 1 | HIS179  | ASP161  |
| 1 | HIS492  | ASP445  |
| 1 | HIS510  | ASP508  |
| 1 | HIS512  | ASP525  |
| 1 | HIS191  | ASP153  |
| 1 | ARG87   | GLU89   |
| 1 | LYS64   | ASP61   |
| 1 | ARG595  | ASP591  |
| 1 | ARG595  | ASP49   |
| 1 | LYS205  | ASP207  |
| 1 | LYS204  | ASP201  |
| 1 | ARG54   | ASP55   |
| 1 | LYS617  | ASP621  |
| 1 | HIS188  | ASP150  |
| 1 | HIS120  | ASP73   |
| 1 | LYS150  | GLU203  |
| 1 | LYS219  | GLU221  |
| 1 | LYS143  | GLU125  |
| 1 | LYS143  | GLU124  |
| 1 | ARG98   | ASP107  |
| 1 | LYS171  | GLU164  |
| 1 | ARG579  | ASP466  |
| 1 | LYS111  | ASP200  |
| 1 | ARG219  | ASP220  |
| 1 | ARG404  | GLU584  |
| 1 | LYS115  | ASP150  |
| 1 | LYS103  | GLU165  |
| 1 | LYS155  | ASP502  |
| 1 | ARG24   | GLU21   |
| 1 | HIS182  | ASP169  |
| 1 | ARG207  | ASP86   |
| 1 | HIS100  | ASP110  |
| 1 | ARG32   | GLU34   |
| 1 | HIS17   | GLU21   |
| 1 | LYS145  | GLU161  |
| 1 | LYS89   | GLU91   |
| 1 | LYS64   | GLU100  |
| 1 | LYS392  | ASP396  |
| 1 | LYS218  | GLU122  |
| 1 | HIS140  | ASP153  |
| 1 | LYS167  | GLU83   |

|   |         |        |
|---|---------|--------|
| 1 | ARG580  | ASP614 |
| 1 | LYS142  | GLU127 |
| 1 | ARG409  | ASP33  |
| 1 | LYS38   | ASP86  |
| 1 | LYS106  | GLU104 |
| 1 | LYS190  | ASP187 |
| 1 | LYS143  | ASP144 |
| 1 | HIS1170 | GLU688 |
| 1 | LYS38   | ASP37  |
| 1 | LYS183  | GLU187 |

Table 2: Counting of salt bridges within the PDB entries in Table 1.

| PDB         | Acceptor (A)  | Donor (D)    | Hydrogen (H) | D-A (Å) | H-A (Å) | $\angle ADH(^{\circ})$ |
|-------------|---------------|--------------|--------------|---------|---------|------------------------|
| 2RLJ-1.PDB  | O, A.ILE_9    | N, A.PHE_12  | H, A.PHE_12  | 2.51    | 1.63    | 20.85                  |
| 2RLJ-11.PDB | O, A.TRP_8    | N, A.TYR_11  | H, A.TYR_11  | 2.98    | 2.09    | 19.25                  |
| 2RLJ-11.PDB | O, A.ILE_9    | N, A.PHE_12  | H, A.PHE_12  | 2.62    | 1.69    | 14.63                  |
| 2RLJ-12.PDB | O, A.ILE_9    | N, A.PHE_12  | H, A.PHE_12  | 2.59    | 1.69    | 19.30                  |
| 2RLJ-13.PDB | O, A.ILE_9    | N, A.PHE_12  | H, A.PHE_12  | 2.63    | 1.78    | 24.81                  |
| 2RLJ-14.PDB | O, A.ILE_9    | N, A.PHE_12  | H, A.PHE_12  | 2.58    | 1.62    | 8.91                   |
| 2RLJ-15.PDB | O, A.ILE_9    | N, A.PHE_12  | H, A.PHE_12  | 2.58    | 1.69    | 20.08                  |
| 2RLJ-16.PDB | O, A.ILE_9    | N, A.GLY_13  | H, A.GLY_13  | 2.99    | 2.03    | 10.52                  |
| 2RLJ-19.PDB | O, A.ILE_9    | N, A.PHE_12  | H, A.PHE_12  | 2.73    | 1.89    | 26.29                  |
| 2RLJ-2.PDB  | O, A.ILE_9    | N, A.PHE_12  | H, A.PHE_12  | 2.58    | 1.69    | 19.33                  |
| 2RLJ-3.PDB  | O, A.ILE_9    | N, A.PHE_12  | H, A.PHE_12  | 2.54    | 1.66    | 20.38                  |
| 2RLJ-4.PDB  | O, A.TRP_8    | N, A.TYR_11  | H, A.TYR_11  | 2.94    | 2.08    | 23.85                  |
| 2RLJ-5.PDB  | O, A.ILE_9    | N, A.PHE_12  | H, A.PHE_12  | 2.60    | 1.76    | 25.80                  |
| 2RLJ-5.PDB  | O, A.PRO_10   | N, A.GLY_13  | H, A.GLY_13  | 2.75    | 1.88    | 22.12                  |
| 2RLJ-6.PDB  | O, A.ILE_9    | N, A.PHE_12  | H, A.PHE_12  | 2.54    | 1.66    | 20.70                  |
| 2RLJ-7.PDB  | O, A.ILE_9    | N, A.PHE_12  | H, A.PHE_12  | 2.71    | 1.84    | 22.67                  |
| 2RLJ-9.PDB  | O, A.ILE_9    | N, A.PHE_12  | H, A.PHE_12  | 2.57    | 1.64    | 13.83                  |
| 5HJ3.PDB    | O, C.ALA_166  | N, C.VAL_97  | H, C.VAL_97  | 2.93    | 2.10    | 12.03                  |
| 5HJ3.PDB    | O, C.VAL_97   | N, C.ALA_166 | H, C.ALA_166 | 2.88    | 2.11    | 22.07                  |
| 5HJ3.PDB    | O, C.LEU_68   | N, C.VAL_180 | H, C.VAL_180 | 2.78    | 1.98    | 17.26                  |
| 5HJ3.PDB    | O, C.VAL_66   | N, C.ALA_182 | H, C.ALA_182 | 2.79    | 1.96    | 12.90                  |
| 5HJ3.PDB    | OE1, J.GLN_89 | OH, J.TYR_36 | HH, J.TYR_36 | 2.57    | 1.82    | 22.55                  |
| 5HJ3.PDB    | O, A.SER_49   | N, A.TRP_36  | H, A.TRP_36  | 2.98    | 2.17    | 16.41                  |
| 5HJ3.PDB    | O, A.TYR_91   | N, A.VAL_37  | H, A.VAL_37  | 2.94    | 2.09    | 8.77                   |
| 5HJ3.PDB    | O, A.LEU_20   | N, A.LEU_80  | H, A.LEU_80  | 2.97    | 2.16    | 16.17                  |
| 5HJ3.PDB    | O, A.VAL_37   | N, A.TYR_91  | H, A.TYR_91  | 2.58    | 1.73    | 5.25                   |
| 5HJ3.PDB    | O, A.ASN_35   | N, A.VAL_93  | H, A.VAL_93  | 3.00    | 2.19    | 17.25                  |
| 5T42-1.PDB  | O, A.GLY_657  | N, A.VAL_662 | H, A.VAL_662 | 2.93    | 1.95    | 0.17                   |
| 5T42-1.PDB  | O, A.VAL_661  | N, A.VAL_665 | H, A.VAL_665 | 2.67    | 1.78    | 19.27                  |
| 5T42-1.PDB  | O, A.VAL_662  | N, A.ILE_666 | H, A.ILE_666 | 2.87    | 1.99    | 20.76                  |
| 5T42-1.PDB  | O, A.ILE_666  | N, A.ALA_670 | H, A.ALA_670 | 2.47    | 1.56    | 18.05                  |
| 5T42-1.PDB  | O, A.LEU_668  | N, A.ILE_671 | H, A.ILE_671 | 2.60    | 1.70    | 18.73                  |
| 5T42-1.PDB  | O, A.ILE_671  | N, A.VAL_675 | H, A.VAL_675 | 2.59    | 1.66    | 14.81                  |
| 5T42-10.PDB | O, A.ASP_642  | N, A.TRP_645 | H, A.TRP_645 | 2.99    | 2.02    | 8.43                   |
| 5T42-10.PDB | O, A.GLY_647  | N, A.GLN_650 | H, A.GLN_650 | 2.93    | 2.13    | 29.57                  |
| 5T42-10.PDB | O, A.GLY_657  | N, A.VAL_661 | H, A.VAL_661 | 2.94    | 2.13    | 28.24                  |
| 5T42-10.PDB | O, A.VAL_661  | N, A.VAL_665 | H, A.VAL_665 | 2.69    | 1.77    | 16.79                  |
| 5T42-10.PDB | O, A.VAL_662  | N, A.ILE_666 | H, A.ILE_666 | 3.00    | 2.20    | 29.07                  |
| 5T42-10.PDB | O, A.ILE_663  | N, A.ALA_667 | H, A.ALA_667 | 2.81    | 2.01    | 29.53                  |
| 5T42-10.PDB | O, A.ILE_666  | N, A.ALA_670 | H, A.ALA_670 | 2.49    | 1.58    | 17.30                  |
| 5T42-10.PDB | O, A.LEU_668  | N, A.ILE_671 | H, A.ILE_671 | 2.61    | 1.69    | 15.97                  |
| 5T42-10.PDB | O, A.ILE_671  | N, A.VAL_675 | H, A.VAL_675 | 2.56    | 1.64    | 15.53                  |
| 5T42-11.PDB | O, A.GLY_657  | N, A.VAL_662 | H, A.VAL_662 | 2.81    | 1.85    | 11.13                  |
| 5T42-11.PDB | O, A.VAL_661  | N, A.VAL_665 | H, A.VAL_665 | 2.82    | 1.97    | 23.92                  |
| 5T42-11.PDB | O, A.VAL_662  | N, A.ILE_666 | H, A.ILE_666 | 2.70    | 1.78    | 16.16                  |
| 5T42-11.PDB | O, A.ILE_666  | N, A.ALA_670 | H, A.ALA_670 | 2.48    | 1.60    | 20.64                  |
| 5T42-11.PDB | O, A.LEU_668  | N, A.ILE_671 | H, A.ILE_671 | 2.64    | 1.75    | 19.83                  |
| 5T42-11.PDB | O, A.ILE_671  | N, A.VAL_675 | H, A.VAL_675 | 2.54    | 1.62    | 15.58                  |
| 5T42-12.PDB | O, A.ASP_642  | N, A.TRP_645 | H, A.TRP_645 | 2.97    | 2.01    | 7.30                   |
| 5T42-12.PDB | O, A.GLY_657  | N, A.VAL_662 | H, A.VAL_662 | 2.85    | 1.89    | 9.61                   |
| 5T42-12.PDB | O, A.VAL_661  | N, A.VAL_665 | H, A.VAL_665 | 2.71    | 1.80    | 16.55                  |
| 5T42-12.PDB | O, A.ILE_663  | N, A.ALA_667 | H, A.ALA_667 | 2.92    | 2.10    | 27.43                  |
| 5T42-12.PDB | O, A.ILE_666  | N, A.ALA_670 | H, A.ALA_670 | 2.49    | 1.61    | 19.85                  |
| 5T42-12.PDB | O, A.LEU_668  | N, A.ILE_671 | H, A.ILE_671 | 2.64    | 1.74    | 18.61                  |
| 5T42-12.PDB | O, A.ALA_672  | N, A.PHE_676 | H, A.PHE_676 | 2.50    | 1.65    | 23.17                  |
| 5T42-13.PDB | O, A.GLY_657  | N, A.VAL_662 | H, A.VAL_662 | 2.59    | 1.66    | 14.08                  |
| 5T42-13.PDB | O, A.VAL_661  | N, A.VAL_665 | H, A.VAL_665 | 2.67    | 1.78    | 19.44                  |

|             |              |                |                 |      |      |       |
|-------------|--------------|----------------|-----------------|------|------|-------|
| 5T42-13.PDB | O, A_VAL.662 | N, A_ILE.666   | H, A_ILE.666    | 2.94 | 2.05 | 20.83 |
| 5T42-13.PDB | O, A_ILE.666 | N, A_ALA.670   | H, A_ALA.670    | 2.45 | 1.56 | 19.27 |
| 5T42-13.PDB | O, A_LEU.668 | N, A_ILE.671   | H, A_ILE.671    | 2.61 | 1.69 | 16.98 |
| 5T42-13.PDB | O, A_ILE.671 | N, A_VAL.675   | H, A_VAL.675    | 2.57 | 1.62 | 12.60 |
| 5T42-14.PDB | O, A_ASP.642 | N, A_TRP.645   | H, A_TRP.645    | 2.95 | 1.98 | 4.18  |
| 5T42-14.PDB | O, A_GLY.657 | N, A_VAL.662   | H, A_VAL.662    | 2.91 | 1.94 | 7.26  |
| 5T42-14.PDB | O, A_VAL.661 | N, A_VAL.665   | H, A_VAL.665    | 2.68 | 1.76 | 16.51 |
| 5T42-14.PDB | O, A_ILE.663 | N, A_ALA.667   | H, A_ALA.667    | 2.87 | 2.08 | 29.84 |
| 5T42-14.PDB | O, A_ILE.666 | N, A_ALA.670   | H, A_ALA.670    | 2.48 | 1.60 | 19.90 |
| 5T42-14.PDB | O, A_LEU.668 | N, A_ILE.671   | H, A_ILE.671    | 2.65 | 1.74 | 18.08 |
| 5T42-14.PDB | O, A_ILE.671 | N, A_VAL.675   | H, A_VAL.675    | 2.56 | 1.62 | 13.44 |
| 5T42-15.PDB | O, A_GLY.657 | N, A_VAL.662   | H, A_VAL.662    | 2.70 | 1.74 | 9.57  |
| 5T42-15.PDB | O, A_VAL.661 | N, A_VAL.665   | H, A_VAL.665    | 2.66 | 1.78 | 20.70 |
| 5T42-15.PDB | O, A_VAL.662 | N, A_ILE.666   | H, A_ILE.666    | 2.88 | 2.00 | 21.01 |
| 5T42-15.PDB | O, A_ILE.666 | N, A_ALA.670   | H, A_ALA.670    | 2.47 | 1.58 | 19.25 |
| 5T42-15.PDB | O, A_LEU.668 | N, A_ILE.671   | H, A_ILE.671    | 2.62 | 1.73 | 20.10 |
| 5T42-15.PDB | O, A_ILE.671 | N, A_VAL.675   | H, A_VAL.675    | 2.59 | 1.64 | 13.08 |
| 5T42-16.PDB | O, A_GLY.657 | N, A_VAL.661   | H, A_VAL.661    | 2.96 | 2.14 | 27.44 |
| 5T42-16.PDB | O, A_VAL.661 | N, A_VAL.665   | H, A_VAL.665    | 2.75 | 1.84 | 17.63 |
| 5T42-16.PDB | O, A_VAL.662 | N, A_ILE.666   | H, A_ILE.666    | 2.97 | 2.15 | 27.18 |
| 5T42-16.PDB | O, A_ILE.663 | N, A_ALA.667   | H, A_ALA.667    | 2.86 | 2.06 | 29.61 |
| 5T42-16.PDB | O, A_ILE.666 | N, A_ALA.670   | H, A_ALA.670    | 2.49 | 1.61 | 20.21 |
| 5T42-16.PDB | O, A_LEU.668 | N, A_ILE.671   | H, A_ILE.671    | 2.65 | 1.73 | 16.77 |
| 5T42-16.PDB | O, A_ILE.671 | N, A_VAL.675   | H, A_VAL.675    | 2.52 | 1.56 | 10.87 |
| 5T42-17.PDB | O, A_ASN.641 | N, A_TRP.644   | H, A_TRP.644    | 2.88 | 1.91 | 6.60  |
| 5T42-17.PDB | O, A_GLY.647 | N, A_GLN.650   | H, A_GLN.650    | 2.78 | 1.97 | 27.65 |
| 5T42-17.PDB | O, A_VAL.661 | N, A_VAL.665   | H, A_VAL.665    | 2.63 | 1.72 | 16.57 |
| 5T42-17.PDB | O, A_ILE.663 | N, A_ALA.667   | H, A_ALA.667    | 2.81 | 2.02 | 29.77 |
| 5T42-17.PDB | O, A_ILE.666 | N, A_ALA.670   | H, A_ALA.670    | 2.49 | 1.62 | 21.02 |
| 5T42-17.PDB | O, A_LEU.668 | N, A_ILE.671   | H, A_ILE.671    | 2.63 | 1.72 | 18.50 |
| 5T42-17.PDB | O, A_ALA.672 | N, A_PHE.676   | H, A_PHE.676    | 2.50 | 1.66 | 24.43 |
| 5T42-18.PDB | O, A_TRP.644 | NH1, A_ARG.649 | HH11, A_ARG.649 | 2.95 | 2.14 | 29.60 |
| 5T42-18.PDB | O, A_GLY.657 | N, A_VAL.662   | H, A_VAL.662    | 2.77 | 1.80 | 7.61  |
| 5T42-18.PDB | O, A_VAL.661 | N, A_VAL.665   | H, A_VAL.665    | 2.78 | 1.94 | 24.62 |
| 5T42-18.PDB | O, A_VAL.662 | N, A_ILE.666   | H, A_ILE.666    | 2.76 | 1.84 | 15.74 |
| 5T42-18.PDB | O, A_ILE.666 | N, A_ALA.670   | H, A_ALA.670    | 2.48 | 1.59 | 19.69 |
| 5T42-18.PDB | O, A_LEU.668 | N, A_ILE.671   | H, A_ILE.671    | 2.61 | 1.69 | 16.18 |
| 5T42-18.PDB | O, A_ILE.671 | N, A_VAL.675   | H, A_VAL.675    | 2.56 | 1.61 | 13.20 |
| 5T42-19.PDB | O, A_GLY.657 | N, A_VAL.662   | H, A_VAL.662    | 2.79 | 1.82 | 5.18  |
| 5T42-19.PDB | O, A_VAL.661 | N, A_VAL.665   | H, A_VAL.665    | 2.69 | 1.77 | 16.49 |
| 5T42-19.PDB | O, A_ILE.663 | N, A_ALA.667   | H, A_ALA.667    | 2.87 | 2.06 | 28.72 |
| 5T42-19.PDB | O, A_ILE.666 | N, A_ALA.670   | H, A_ALA.670    | 2.49 | 1.61 | 19.50 |
| 5T42-19.PDB | O, A_LEU.668 | N, A_ILE.671   | H, A_ILE.671    | 2.63 | 1.70 | 15.62 |
| 5T42-19.PDB | O, A_ILE.671 | N, A_VAL.675   | H, A_VAL.675    | 2.54 | 1.60 | 14.03 |
| 5T42-2.PDB  | O, A_GLY.647 | N, A_GLN.650   | H, A_GLN.650    | 2.85 | 1.99 | 23.63 |
| 5T42-2.PDB  | O, A_GLN.650 | N, A_VAL.658   | H, A_VAL.658    | 2.89 | 2.05 | 24.99 |
| 5T42-2.PDB  | O, A_GLY.657 | N, A_VAL.662   | H, A_VAL.662    | 2.80 | 1.82 | 2.37  |
| 5T42-2.PDB  | O, A_VAL.661 | N, A_VAL.665   | H, A_VAL.665    | 2.67 | 1.75 | 16.21 |
| 5T42-2.PDB  | O, A_ILE.663 | N, A_ALA.667   | H, A_ALA.667    | 2.88 | 2.06 | 27.64 |
| 5T42-2.PDB  | O, A_ILE.666 | N, A_ALA.670   | H, A_ALA.670    | 2.48 | 1.59 | 19.13 |
| 5T42-2.PDB  | O, A_LEU.668 | N, A_ILE.671   | H, A_ILE.671    | 2.64 | 1.72 | 16.09 |
| 5T42-2.PDB  | O, A_ILE.671 | N, A_VAL.675   | H, A_VAL.675    | 2.56 | 1.62 | 13.86 |
| 5T42-20.PDB | O, A_ASP.642 | N, A_TRP.645   | H, A_TRP.645    | 2.93 | 1.95 | 4.32  |
| 5T42-20.PDB | O, A_GLY.647 | N, A_GLN.650   | H, A_GLN.650    | 2.94 | 2.14 | 29.59 |
| 5T42-20.PDB | O, A_GLY.657 | N, A_VAL.662   | H, A_VAL.662    | 2.80 | 1.85 | 12.29 |
| 5T42-20.PDB | O, A_VAL.661 | N, A_VAL.665   | H, A_VAL.665    | 2.73 | 1.85 | 21.16 |
| 5T42-20.PDB | O, A_VAL.662 | N, A_ILE.666   | H, A_ILE.666    | 2.83 | 1.95 | 21.15 |
| 5T42-20.PDB | O, A_ILE.666 | N, A_ALA.670   | H, A_ALA.670    | 2.47 | 1.58 | 18.76 |

|             |                |               |                |      |      |       |
|-------------|----------------|---------------|----------------|------|------|-------|
| 5T42-20.PDB | O, A_LEU.668   | N, A_ILE.671  | H, A_ILE.671   | 2.64 | 1.75 | 19.40 |
| 5T42-20.PDB | O, A_ILE.671   | N, A_VAL.675  | H, A_VAL.675   | 2.55 | 1.62 | 15.71 |
| 5T42-3.PDB  | O, A_GLY.655   | N, A_THR.659  | H, A_THR.659   | 2.55 | 1.77 | 29.97 |
| 5T42-3.PDB  | O, A_VAL.661   | N, A_VAL.665  | H, A_VAL.665   | 2.73 | 1.82 | 17.54 |
| 5T42-3.PDB  | O, A_VAL.662   | N, A_ILE.666  | H, A_ILE.666   | 2.99 | 2.18 | 28.74 |
| 5T42-3.PDB  | O, A_ILE.663   | N, A_ALA.667  | H, A_ALA.667   | 2.79 | 1.98 | 28.05 |
| 5T42-3.PDB  | O, A_ILE.666   | N, A_ALA.670  | H, A_ALA.670   | 2.48 | 1.60 | 19.71 |
| 5T42-3.PDB  | O, A_LEU.668   | N, A_ILE.671  | H, A_ILE.671   | 2.66 | 1.74 | 16.19 |
| 5T42-3.PDB  | O, A_ILE.671   | N, A_VAL.675  | H, A_VAL.675   | 2.56 | 1.62 | 14.42 |
| 5T42-4.PDB  | O, A_GLY.647   | N, A_TRP.651  | H, A_TRP.651   | 2.59 | 1.68 | 16.69 |
| 5T42-4.PDB  | O, A_GLY.655   | N, A_THR.659  | H, A_THR.659   | 2.57 | 1.78 | 28.87 |
| 5T42-4.PDB  | O, A_VAL.661   | N, A_VAL.665  | H, A_VAL.665   | 2.61 | 1.73 | 20.44 |
| 5T42-4.PDB  | O, A_VAL.662   | N, A_ILE.666  | H, A_ILE.666   | 2.87 | 1.99 | 21.34 |
| 5T42-4.PDB  | O, A_ILE.666   | N, A_ALA.670  | H, A_ALA.670   | 2.47 | 1.57 | 17.87 |
| 5T42-4.PDB  | O, A_LEU.668   | N, A_ILE.671  | H, A_ILE.671   | 2.61 | 1.72 | 19.23 |
| 5T42-4.PDB  | O, A_ILE.671   | N, A_VAL.675  | H, A_VAL.675   | 2.57 | 1.63 | 13.71 |
| 5T42-5.PDB  | O, A_GLY.647   | N, A_GLN.650  | H, A_GLN.650   | 2.85 | 1.98 | 22.54 |
| 5T42-5.PDB  | O, A_GLY.657   | N, A_VAL.662  | H, A_VAL.662   | 2.92 | 1.95 | 7.59  |
| 5T42-5.PDB  | O, A_VAL.661   | N, A_VAL.665  | H, A_VAL.665   | 2.70 | 1.79 | 17.07 |
| 5T42-5.PDB  | O, A_VAL.662   | N, A_ILE.666  | H, A_ILE.666   | 2.97 | 2.14 | 26.58 |
| 5T42-5.PDB  | O, A_ILE.663   | N, A_ALA.667  | H, A_ALA.667   | 2.96 | 2.16 | 29.30 |
| 5T42-5.PDB  | O, A_ILE.666   | N, A_ALA.670  | H, A_ALA.670   | 2.48 | 1.60 | 20.58 |
| 5T42-5.PDB  | O, A_LEU.668   | N, A_ILE.671  | H, A_ILE.671   | 2.66 | 1.76 | 19.47 |
| 5T42-5.PDB  | O, A_ILE.671   | N, A_VAL.675  | H, A_VAL.675   | 2.57 | 1.64 | 14.61 |
| 5T42-6.PDB  | O, A ASP.642   | N, A_THR.646  | H, A_THR.646   | 2.82 | 1.99 | 26.68 |
| 5T42-6.PDB  | O, A_GLY.657   | N, A_VAL.662  | H, A_VAL.662   | 2.76 | 1.79 | 8.30  |
| 5T42-6.PDB  | O, A_VAL.661   | N, A_VAL.665  | H, A_VAL.665   | 2.76 | 1.89 | 21.67 |
| 5T42-6.PDB  | O, A_VAL.662   | N, A_ILE.666  | H, A_ILE.666   | 2.85 | 1.95 | 19.14 |
| 5T42-6.PDB  | O, A_ILE.666   | N, A_ALA.670  | H, A_ALA.670   | 2.48 | 1.61 | 21.67 |
| 5T42-6.PDB  | O, A_LEU.668   | N, A_ILE.671  | H, A_ILE.671   | 2.64 | 1.75 | 19.95 |
| 5T42-6.PDB  | O, A_ILE.671   | N, A_VAL.675  | H, A_VAL.675   | 2.63 | 1.70 | 15.13 |
| 5T42-7.PDB  | O, A_GLY.647   | N, A_GLN.650  | H, A_GLN.650   | 2.74 | 1.91 | 26.39 |
| 5T42-7.PDB  | O, A_GLY.655   | N, A_THR.659  | H, A_THR.659   | 2.58 | 1.78 | 28.20 |
| 5T42-7.PDB  | O, A_VAL.661   | N, A_VAL.665  | H, A_VAL.665   | 2.65 | 1.77 | 20.26 |
| 5T42-7.PDB  | O, A_VAL.662   | N, A_ILE.666  | H, A_ILE.666   | 2.84 | 1.96 | 20.50 |
| 5T42-7.PDB  | O, A_ILE.666   | N, A_ALA.670  | H, A_ALA.670   | 2.48 | 1.58 | 18.36 |
| 5T42-7.PDB  | O, A_LEU.668   | N, A_ILE.671  | H, A_ILE.671   | 2.60 | 1.68 | 15.41 |
| 5T42-7.PDB  | O, A_ILE.671   | N, A_VAL.675  | H, A_VAL.675   | 2.56 | 1.63 | 14.62 |
| 5T42-8.PDB  | O, A_GLY.647   | N, A_GLN.650  | H, A_GLN.650   | 2.71 | 1.91 | 28.69 |
| 5T42-8.PDB  | O, A_VAL.661   | N, A_VAL.665  | H, A_VAL.665   | 2.71 | 1.80 | 17.39 |
| 5T42-8.PDB  | O, A_VAL.662   | N, A_ILE.666  | H, A_ILE.666   | 2.97 | 2.15 | 26.89 |
| 5T42-8.PDB  | O, A_ILE.663   | N, A_ALA.667  | H, A_ALA.667   | 2.86 | 2.06 | 28.83 |
| 5T42-8.PDB  | O, A_ILE.666   | N, A_ALA.670  | H, A_ALA.670   | 2.49 | 1.58 | 18.05 |
| 5T42-8.PDB  | O, A_LEU.668   | N, A_ILE.671  | H, A_ILE.671   | 2.64 | 1.73 | 17.27 |
| 5T42-8.PDB  | O, A_ILE.671   | N, A_VAL.675  | H, A_VAL.675   | 2.59 | 1.65 | 13.58 |
| 5T42-9.PDB  | OG1, A_THR.634 | NZ, A_LYS.633 | HZ2, A_LYS.633 | 2.68 | 1.67 | 11.19 |
| 5T42-9.PDB  | O, A_VAL.661   | N, A_VAL.665  | H, A_VAL.665   | 2.72 | 1.81 | 17.22 |
| 5T42-9.PDB  | O, A_VAL.662   | N, A_ILE.666  | H, A_ILE.666   | 2.97 | 2.16 | 28.57 |
| 5T42-9.PDB  | O, A_ILE.663   | N, A_ALA.667  | H, A_ALA.667   | 2.80 | 2.00 | 29.42 |
| 5T42-9.PDB  | O, A_ILE.666   | N, A_ALA.670  | H, A_ALA.670   | 2.48 | 1.60 | 19.55 |
| 5T42-9.PDB  | O, A_LEU.668   | N, A_ILE.671  | H, A_ILE.671   | 2.64 | 1.73 | 16.82 |
| 5T42-9.PDB  | O, A_ILE.671   | N, A_VAL.675  | H, A_VAL.675   | 2.56 | 1.62 | 13.44 |

---

Table 3: The side chain and main chain hydrogen bonding networks. In this table, the names of the PDB files correspond to the single NMR structural model split from the NMR ensemble, the residue naming scheme is **Chain ID\_residue name\_residue number**,  $\angle ADH$  represents the angle formed by acceptor (A), donor (D) and hydrogen (H) ( $\angle ADH$ ).

| PDB        | Acceptor (A)   | Donor (D)     | Hydrogen (H)   | D-A (Å) | H-A (Å) | $\angle ADH(^{\circ})$ |
|------------|----------------|---------------|----------------|---------|---------|------------------------|
| 5HJ3.PDB   | OE1, J_GLN_89  | OH, J_TYR_36  | HH, J_TYR_36   | 2.57    | 1.82    | 22.55                  |
| 5T42-9.PDB | OG1, A_THR_634 | NZ, A_LYS_633 | HZ2, A_LYS_633 | 2.68    | 1.67    | 11.19                  |

Table 4: Side chain hydrogen bonding network analysis. In this table, the names of the PDB files correspond to the single NMR structural model split from the NMR ensemble, the residue naming scheme is **Chain ID\_residue name\_residue number**,  $\angle ADH$  represents the angle formed by acceptor (A), donor (D) and hydrogen (H) ( $\angle ADH$ ).

| PDB ID | Residue A | Atom A | Residue B | Atom B | Distance (Å) |
|--------|-----------|--------|-----------|--------|--------------|
| 1EBO   | A_LYS_87  | NZ     | C_ASP_106 | OD2    | 3.887        |
| 1EBO   | A_HIS_112 | ND1    | B_GLU_77  | OE1    | 3.658        |
| 1EBO   | A_HIS_112 | ND1    | B_GLU_77  | OE2    | 3.104        |
| 1EBO   | B_HIS_112 | ND1    | C_GLU_77  | OE1    | 3.068        |
| 1EBO   | B_HIS_112 | ND1    | C_GLU_77  | OE2    | 2.658        |
| 1EBO   | C_LYS_7   | NZ     | B_GLU_9   | OE1    | 3.472        |
| 1EBO   | C_LYS_26  | NZ     | A_GLU_21  | OE1    | 2.847        |
| 1EBO   | C_LYS_26  | NZ     | A_GLU_21  | OE2    | 3.880        |
| 1EBO   | C_LYS_87  | NZ     | B_ASP_106 | OD2    | 3.920        |
| 1EBO   | D_HIS_112 | ND1    | E_GLU_77  | OE1    | 3.490        |
| 1EBO   | D_HIS_112 | ND1    | E_GLU_77  | OE2    | 2.696        |
| 1EBO   | E_LYS_26  | NZ     | F_GLU_21  | OE2    | 3.162        |
| 1EBO   | E_LYS_87  | NZ     | D_ASP_106 | OD2    | 3.925        |
| 1EBO   | F_LYS_26  | NZ     | D_GLU_21  | OE1    | 3.927        |
| 1EBO   | F_LYS_87  | NZ     | E_ASP_106 | OD2    | 3.651        |
| 1EBO   | F_HIS_112 | ND1    | D_GLU_77  | OE2    | 3.188        |
| 2EBO   | A_HIS_613 | ND1    | B_GLU_578 | OE1    | 3.396        |
| 2EBO   | A_HIS_613 | ND1    | B_GLU_578 | OE2    | 3.211        |
| 2EBO   | B_HIS_613 | ND1    | C_GLU_578 | OE1    | 3.346        |
| 2EBO   | B_HIS_613 | ND1    | C_GLU_578 | OE2    | 2.789        |
| 2QHR   | H_LYS_143 | NZ     | L_GLU_125 | OE2    | 2.743        |
| 2QHR   | H_HIS_164 | ND1    | L_GLU_168 | OE1    | 3.446        |
| 2QHR   | H_HIS_164 | ND1    | L_GLU_168 | OE2    | 2.691        |
| 2QHR   | H_LYS_208 | NZ     | L_GLU_124 | OE1    | 3.025        |
| 2QHR   | H_LYS_208 | NZ     | L_GLU_124 | OE2    | 3.278        |
| 2QHR   | L_LYS_204 | NZ     | H_ASP_130 | OD1    | 2.837        |
| 2QHR   | L_LYS_204 | NZ     | H_ASP_130 | OD2    | 3.813        |
| 2QHR   | P_HIS_407 | ND1    | L_ASP_92  | OD1    | 3.553        |
| 2QHR   | P_ARG_409 | NH1    | H_ASP_33  | OD2    | 2.967        |
| 2Y6S   | C_ARG_100 | NH1    | D_GLU_50  | OE1    | 2.758        |
| 2Y6S   | D_LYS_208 | NZ     | C_GLU_127 | OE1    | 3.225        |
| 2Y6S   | H_LYS_208 | NZ     | L_GLU_127 | OE1    | 3.152        |
| 2Y6S   | L_ARG_100 | NH1    | H_GLU_50  | OE1    | 2.759        |
| 2Y6S   | L_ARG_100 | NH2    | H_GLU_50  | OE1    | 3.945        |
| 3CSY   | A_LYS_221 | NZ     | B_GLU_123 | OE1    | 3.090        |
| 3CSY   | A_LYS_221 | NZ     | B_GLU_123 | OE2    | 3.307        |
| 3CSY   | C_HIS_172 | NE2    | D_ASP_167 | OD2    | 3.885        |
| 3CSY   | C_LYS_221 | NZ     | D_GLU_123 | OE1    | 3.258        |
| 3CSY   | C_LYS_221 | NZ     | D_GLU_123 | OE2    | 3.282        |
| 3CSY   | E_LYS_221 | NZ     | F_GLU_123 | OE1    | 3.238        |
| 3CSY   | E_LYS_221 | NZ     | F_GLU_123 | OE2    | 3.205        |
| 3CSY   | G_HIS_172 | NE2    | H_ASP_167 | OD2    | 3.733        |
| 3CSY   | G_LYS_221 | NZ     | H_GLU_123 | OE1    | 3.440        |
| 3CSY   | G_LYS_221 | NZ     | H_GLU_123 | OE2    | 3.445        |
| 3CSY   | I_ARG_134 | NH1    | J_GLU_545 | OE2    | 3.043        |
| 3CSY   | J_ARG_559 | NH2    | I_GLU_103 | OE1    | 3.261        |
| 3CSY   | J_ARG_559 | NH2    | I_GLU_103 | OE2    | 3.005        |
| 3CSY   | K_ARG_134 | NH1    | L_GLU_545 | OE2    | 3.181        |
| 3CSY   | L_ARG_559 | NH2    | K_GLU_103 | OE1    | 3.317        |
| 3CSY   | L_ARG_559 | NH2    | K_GLU_103 | OE2    | 3.156        |
| 3CSY   | M_ARG_134 | NH1    | N_GLU_545 | OE2    | 2.894        |
| 3CSY   | N_ARG_559 | NH2    | M_GLU_103 | OE1    | 2.925        |
| 3CSY   | N_ARG_559 | NH2    | M_GLU_103 | OE2    | 3.048        |
| 3CSY   | O_ARG_134 | NH1    | P_GLU_545 | OE2    | 3.026        |
| 3CSY   | P_ARG_559 | NH2    | O_GLU_103 | OE1    | 3.054        |
| 3CSY   | P_ARG_559 | NH2    | O_GLU_103 | OE2    | 2.808        |
| 3VE0   | J_ARG_559 | NH1    | I_GLU_103 | OE1    | 3.852        |

|      |           |     |           |     |       |
|------|-----------|-----|-----------|-----|-------|
| 3VE0 | J_ARG_559 | NH1 | L_GLU_103 | OE2 | 3.848 |
| 3VE0 | J_ARG_559 | NH2 | L_GLU_103 | OE1 | 2.444 |
| 3VE0 | J_ARG_559 | NH2 | L_GLU_103 | OE2 | 2.766 |
| 3VE0 | J_ARG_595 | NH2 | I_ASP_49  | OD2 | 3.842 |
| 3VE0 | J_ARG_596 | NH1 | I_ASP_55  | OD1 | 3.003 |
| 3VE0 | A_ARG_98  | NH2 | L_GLU_44  | OE1 | 3.137 |
| 3VE0 | A_ARG_98  | NH2 | L_GLU_44  | OE2 | 3.008 |
| 3VE0 | A_LYS_214 | NZ  | B_GLU_123 | OE1 | 3.666 |
| 3VE0 | A_LYS_214 | NZ  | B_GLU_123 | OE2 | 2.624 |
| 5F1B | A_ARG_134 | NH1 | B_GLU_545 | OE2 | 3.659 |
| 5F1B | B_ARG_559 | NH1 | A_GLU_103 | OE1 | 3.219 |
| 5F1B | B_ARG_559 | NH1 | A_GLU_103 | OE2 | 3.449 |
| 5F1B | B_ARG_559 | NH2 | A_GLU_103 | OE1 | 3.928 |
| 5F1B | B_ARG_559 | NH2 | A_GLU_103 | OE2 | 2.697 |
| 5F1B | B_LYS_588 | NZ  | A_ASP_47  | OD1 | 3.551 |
| 5F1B | B_LYS_588 | NZ  | A_ASP_47  | OD2 | 3.521 |
| 5FHC | J_ARG_559 | NH2 | K_GLU_103 | OE1 | 3.531 |
| 5FHC | J_ARG_559 | NH2 | K_GLU_103 | OE2 | 3.399 |
| 5FHC | K_ARG_134 | NH1 | J_GLU_545 | OE2 | 2.861 |
| 5FHC | A_LYS_143 | NZ  | B_GLU_124 | OE2 | 2.678 |
| 5FHC | A_LYS_209 | NZ  | B_GLU_123 | OE1 | 2.702 |
| 5FHC | A_LYS_209 | NZ  | B_GLU_123 | OE2 | 3.358 |
| 5FHC | H_LYS_209 | NZ  | L_GLU_123 | OE1 | 3.238 |
| 5FHC | H_LYS_209 | NZ  | L_GLU_123 | OE2 | 3.173 |
| 5HJ3 | D_LYS_510 | NZ  | J_GLU_55  | OE1 | 3.743 |
| 5HJ3 | D_LYS_510 | NZ  | J_GLU_55  | OE2 | 3.493 |
| 5HJ3 | D_ARG_559 | NH2 | C_GLU_103 | OE1 | 2.496 |
| 5HJ3 | D_ARG_559 | NH2 | C_GLU_103 | OE2 | 2.573 |
| 5HJ3 | E_LYS_221 | NZ  | F_GLU_123 | OE2 | 3.658 |
| 5HJ3 | H_LYS_510 | NZ  | F_GLU_55  | OE2 | 3.815 |
| 5HJ3 | H_ARG_559 | NH2 | G_GLU_103 | OE1 | 2.521 |
| 5HJ3 | H_ARG_559 | NH2 | G_GLU_103 | OE2 | 2.719 |
| 5HJ3 | I_HIS_172 | NE2 | J_ASP_167 | OD2 | 3.705 |
| 5HJ3 | I_LYS_221 | NZ  | J_GLU_123 | OE1 | 3.253 |
| 5HJ3 | I_LYS_221 | NZ  | J_GLU_123 | OE2 | 2.800 |
| 5HJ3 | L_ARG_559 | NH2 | K_GLU_103 | OE1 | 2.680 |
| 5HJ3 | L_ARG_559 | NH2 | K_GLU_103 | OE2 | 2.484 |
| 5HJ3 | L_HIS_602 | ND1 | H_GLU_611 | OE1 | 3.679 |
| 5HJ3 | L_HIS_602 | NE2 | H_GLU_611 | OE1 | 3.945 |
| 5HJ3 | M_LYS_221 | NZ  | N_GLU_123 | OE1 | 3.397 |
| 5HJ3 | M_LYS_221 | NZ  | N_GLU_123 | OE2 | 3.011 |
| 5HJ3 | P_LYS_510 | NZ  | B_GLU_55  | OE1 | 3.843 |
| 5HJ3 | P_LYS_510 | NZ  | B_GLU_55  | OE2 | 3.553 |
| 5HJ3 | P_ARG_559 | NH2 | O_GLU_103 | OE1 | 2.547 |
| 5HJ3 | P_ARG_559 | NH2 | O_GLU_103 | OE2 | 2.625 |
| 5HJ3 | P_HIS_602 | NE2 | L_GLU_611 | OE1 | 3.277 |
| 5HJ3 | A_LYS_221 | NZ  | B_GLU_123 | OE1 | 3.583 |
| 5HJ3 | A_LYS_221 | NZ  | B_GLU_123 | OE2 | 3.404 |
| 5JNX | C_ARG_134 | NH1 | D_GLU_545 | OE2 | 3.659 |
| 5JNX | D_ARG_559 | NH1 | C_GLU_103 | OE1 | 3.220 |
| 5JNX | D_ARG_559 | NH1 | C_GLU_103 | OE2 | 3.450 |
| 5JNX | D_ARG_559 | NH2 | C_GLU_103 | OE1 | 3.927 |
| 5JNX | D_ARG_559 | NH2 | C_GLU_103 | OE2 | 2.697 |
| 5JNX | D_LYS_588 | NZ  | C_ASP_47  | OD1 | 3.551 |
| 5JNX | D_LYS_588 | NZ  | C_ASP_47  | OD2 | 3.521 |
| 5JNX | E_ARG_134 | NH1 | F_GLU_545 | OE2 | 3.660 |
| 5JNX | E_LYS_155 | NZ  | A_ASP_502 | OD2 | 3.701 |
| 5JNX | F_ARG_559 | NH1 | E_GLU_103 | OE1 | 3.219 |

|      |           |     |           |     |       |
|------|-----------|-----|-----------|-----|-------|
| 5JNX | F_ARG_559 | NH1 | E_GLU_103 | OE2 | 3.448 |
| 5JNX | F_ARG_559 | NH2 | E_GLU_103 | OE1 | 3.927 |
| 5JNX | F_ARG_559 | NH2 | E_GLU_103 | OE2 | 2.697 |
| 5JNX | F_LYS_588 | NZ  | E_ASP_47  | OD1 | 3.552 |
| 5JNX | F_LYS_588 | NZ  | E_ASP_47  | OD2 | 3.520 |
| 5JNX | G_ARG_134 | NH1 | H_GLU_545 | OE2 | 3.659 |
| 5JNX | H_ARG_559 | NH1 | G_GLU_103 | OE1 | 3.221 |
| 5JNX | H_ARG_559 | NH1 | G_GLU_103 | OE2 | 3.449 |
| 5JNX | H_ARG_559 | NH2 | G_GLU_103 | OE1 | 3.928 |
| 5JNX | H_ARG_559 | NH2 | G_GLU_103 | OE2 | 2.697 |
| 5JNX | H_LYS_588 | NZ  | G_ASP_47  | OD1 | 3.552 |
| 5JNX | H_LYS_588 | NZ  | G_ASP_47  | OD2 | 3.522 |
| 5JQ3 | B_ARG_559 | NH1 | A_GLU_103 | OE1 | 2.754 |
| 5JQ3 | B_ARG_559 | NH1 | A_GLU_103 | OE2 | 3.830 |
| 5JQ3 | B_ARG_559 | NH2 | A_GLU_103 | OE1 | 3.362 |
| 5JQ3 | B_ARG_559 | NH2 | A_GLU_103 | OE2 | 2.945 |
| 5JQ7 | B_LYS_510 | NZ  | A_GLU_292 | OE1 | 3.131 |
| 5JQ7 | B_ARG_559 | NH1 | A_GLU_103 | OE1 | 2.800 |
| 5JQ7 | B_ARG_559 | NH1 | A_GLU_103 | OE2 | 3.720 |
| 5JQ7 | B_ARG_559 | NH2 | A_GLU_103 | OE1 | 3.375 |
| 5JQ7 | B_ARG_559 | NH2 | A_GLU_103 | OE2 | 2.748 |
| 5JQB | B_LYS_510 | NZ  | A_GLU_292 | OE1 | 2.746 |
| 5JQB | B_LYS_510 | NZ  | A_GLU_292 | OE2 | 3.918 |
| 5JQB | B_ARG_559 | NH1 | A_GLU_103 | OE1 | 2.703 |
| 5JQB | B_ARG_559 | NH1 | A_GLU_103 | OE2 | 3.788 |
| 5JQB | B_ARG_559 | NH2 | A_GLU_103 | OE1 | 3.188 |
| 5JQB | B_ARG_559 | NH2 | A_GLU_103 | OE2 | 2.857 |
| 5JQB | B_LYS_588 | NZ  | A_ASP_47  | OD1 | 3.558 |
| 5JQB | B_LYS_588 | NZ  | A_ASP_47  | OD2 | 3.148 |
| 5KEL | A_ARG_130 | NH1 | B_GLU_540 | OE2 | 3.053 |
| 5KEL | A_LYS_272 | NZ  | C_ASP_54  | OD2 | 3.464 |
| 5KEL | A_LYS_272 | NZ  | C_ASP_56  | OD2 | 2.595 |
| 5KEL | B_ARG_559 | NH1 | A_GLU_103 | OE2 | 3.831 |
| 5KEL | B_ARG_559 | NH2 | A_GLU_103 | OE1 | 3.279 |
| 5KEL | B_ARG_559 | NH2 | A_GLU_103 | OE2 | 3.801 |
| 5KEL | E_ARG_130 | NH1 | G_GLU_540 | OE2 | 3.054 |
| 5KEL | E_LYS_272 | NZ  | J_ASP_54  | OD2 | 3.464 |
| 5KEL | E_LYS_272 | NZ  | J_ASP_56  | OD2 | 2.596 |
| 5KEL | G_ARG_559 | NH1 | E_GLU_103 | OE2 | 3.832 |
| 5KEL | G_ARG_559 | NH2 | E_GLU_103 | OE1 | 3.279 |
| 5KEL | G_ARG_559 | NH2 | E_GLU_103 | OE2 | 3.802 |
| 5KEL | F_ARG_130 | NH1 | I_GLU_540 | OE2 | 3.053 |
| 5KEL | F_LYS_272 | NZ  | M_ASP_54  | OD2 | 3.463 |
| 5KEL | F_LYS_272 | NZ  | M_ASP_56  | OD2 | 2.596 |
| 5KEL | I_ARG_559 | NH1 | F_GLU_103 | OE2 | 3.831 |
| 5KEL | I_ARG_559 | NH2 | F_GLU_103 | OE1 | 3.279 |
| 5KEL | I_ARG_559 | NH2 | F_GLU_103 | OE2 | 3.801 |
| 5KEM | A_LYS_272 | NZ  | D_ASP_54  | OD1 | 2.876 |
| 5KEM | A_LYS_272 | NZ  | D_ASP_54  | OD2 | 3.185 |
| 5KEM | F_LYS_272 | NZ  | I_ASP_54  | OD1 | 2.876 |
| 5KEM | F_LYS_272 | NZ  | I_ASP_54  | OD2 | 3.185 |
| 5KEN | A_ARG_134 | NH2 | B_GLU_545 | OE1 | 2.859 |
| 5KEN | B_LYS_510 | NZ  | D_GLU_56  | OE1 | 3.639 |
| 5KEN | B_LYS_510 | NZ  | D_GLU_56  | OE2 | 2.773 |
| 5KEN | B_HIS_549 | NE2 | C_ASP_52  | OD1 | 3.874 |
| 5KEN | B_ARG_559 | NH1 | A_GLU_103 | OE1 | 3.709 |
| 5KEN | B_ARG_559 | NH1 | A_GLU_103 | OE2 | 2.818 |
| 5KEN | B_ARG_559 | NH2 | A_GLU_103 | OE1 | 3.114 |

|      |           |     |           |     |       |
|------|-----------|-----|-----------|-----|-------|
| 5KEN | B_ARG_559 | NH2 | A_GLU_103 | OE2 | 3.662 |
| 5KEN | E_LYS_272 | NZ  | J_ASP_54  | OD2 | 3.722 |
| 5KEN | E_LYS_272 | NZ  | J_ASP_56  | OD1 | 3.736 |
| 5KEN | E_LYS_272 | NZ  | J_ASP_56  | OD2 | 2.765 |
| 5KEN | F_LYS_510 | NZ  | H_GLU_56  | OE2 | 2.720 |
| 5KEN | F_HIS_549 | NE2 | G_ASP_52  | OD1 | 3.491 |
| 5KEN | F_ARG_559 | NH1 | E_GLU_103 | OE1 | 3.868 |
| 5KEN | F_ARG_559 | NH1 | E_GLU_103 | OE2 | 2.947 |
| 5KEN | F_ARG_559 | NH2 | E_GLU_103 | OE1 | 3.043 |
| 5KEN | F_ARG_559 | NH2 | E_GLU_103 | OE2 | 3.542 |
| 5KEN | G_LYS_62  | NZ  | H_ASP_1   | OD2 | 2.735 |
| 5KEN | K_LYS_272 | NZ  | Q_ASP_54  | OD2 | 3.814 |
| 5KEN | K_LYS_272 | NZ  | Q_ASP_56  | OD1 | 3.710 |
| 5KEN | K_LYS_272 | NZ  | Q_ASP_56  | OD2 | 2.769 |
| 5KEN | M_LYS_510 | NZ  | O_GLU_56  | OE2 | 2.667 |
| 5KEN | M_ARG_559 | NH1 | K_GLU_103 | OE1 | 3.708 |
| 5KEN | M_ARG_559 | NH1 | K_GLU_103 | OE2 | 2.824 |
| 5KEN | M_ARG_559 | NH2 | K_GLU_103 | OE1 | 3.090 |
| 5KEN | M_ARG_559 | NH2 | K_GLU_103 | OE2 | 3.645 |
| 5KEN | N_LYS_62  | NZ  | O_ASP_1   | OD2 | 2.793 |
| 6DZL | G_HIS_96  | ND1 | J_GLU_55  | OE2 | 3.342 |
| 6DZL | G_HIS_96  | NE2 | J_GLU_55  | OE1 | 3.570 |
| 6DZL | G_HIS_96  | NE2 | J_GLU_55  | OE2 | 3.728 |
| 6DZL | H_HIS_96  | ND1 | K_GLU_55  | OE2 | 3.341 |
| 6DZL | H_HIS_96  | NE2 | K_GLU_55  | OE1 | 3.571 |
| 6DZL | H_HIS_96  | NE2 | K_GLU_55  | OE2 | 3.727 |
| 6DZL | I_HIS_96  | ND1 | L_GLU_55  | OE2 | 3.341 |
| 6DZL | I_HIS_96  | NE2 | L_GLU_55  | OE1 | 3.571 |
| 6DZL | I_HIS_96  | NE2 | L_GLU_55  | OE2 | 3.727 |
| 6EA7 | B_ARG_559 | NH1 | A_GLU_103 | OE1 | 2.641 |
| 6EA7 | B_ARG_559 | NH1 | A_GLU_103 | OE2 | 3.432 |
| 6EA7 | B_ARG_559 | NH2 | A_GLU_103 | OE2 | 3.686 |
| 6EA7 | B_HIS_602 | ND1 | F_GLU_611 | OE1 | 3.135 |
| 6EA7 | D_ARG_559 | NH1 | C_GLU_103 | OE1 | 2.573 |
| 6EA7 | D_ARG_559 | NH1 | C_GLU_103 | OE2 | 3.488 |
| 6EA7 | D_ARG_559 | NH2 | C_GLU_103 | OE1 | 3.832 |
| 6EA7 | D_ARG_559 | NH2 | C_GLU_103 | OE2 | 3.318 |
| 6EA7 | D_HIS_602 | ND1 | B_GLU_611 | OE1 | 3.062 |
| 6EA7 | F_ARG_559 | NH1 | E_GLU_103 | OE1 | 2.812 |
| 6EA7 | F_ARG_559 | NH1 | E_GLU_103 | OE2 | 3.584 |
| 6EA7 | F_ARG_559 | NH2 | E_GLU_103 | OE2 | 3.608 |
| 6EA7 | F_ARG_596 | NH2 | E_ASP_55  | OD1 | 2.483 |
| 6EA7 | F_ARG_596 | NH2 | E_ASP_55  | OD2 | 3.342 |
| 6EA7 | F_HIS_602 | ND1 | D_GLU_611 | OE1 | 3.253 |
| 6EA7 | H_HIS_100 | ND1 | L_GLU_55  | OE1 | 3.325 |
| 6EA7 | H_HIS_100 | NE2 | L_GLU_55  | OE1 | 3.655 |
| 6EA7 | H_HIS_108 | NE2 | L_ASP_50  | OD1 | 2.912 |
| 6EA7 | H_HIS_173 | ND1 | L_ASP_166 | OD1 | 3.947 |
| 6EA7 | H_HIS_173 | ND1 | L_ASP_166 | OD2 | 3.590 |
| 6EA7 | H_LYS_218 | NZ  | L_GLU_122 | OE1 | 2.826 |
| 6EA7 | M_HIS_100 | ND1 | N_GLU_55  | OE1 | 3.446 |
| 6EA7 | M_HIS_100 | ND1 | N_GLU_55  | OE2 | 3.681 |
| 6EA7 | M_HIS_108 | ND1 | N_ASP_50  | OD1 | 3.757 |
| 6EA7 | M_HIS_108 | NE2 | N_ASP_50  | OD1 | 3.718 |
| 6EA7 | M_HIS_173 | ND1 | N_ASP_166 | OD2 | 3.701 |
| 6EA7 | Q_HIS_108 | NE2 | R_ASP_50  | OD1 | 3.227 |
| 6EA7 | Q_HIS_173 | ND1 | R_ASP_166 | OD1 | 3.817 |
| 6EA7 | Q_HIS_173 | ND1 | R_ASP_166 | OD2 | 3.600 |

|      |           |     |           |     |       |
|------|-----------|-----|-----------|-----|-------|
| 6F5U | B_LYS_510 | NZ  | A_GLU_292 | OE1 | 3.345 |
| 6F5U | B_ARG_559 | NH1 | A_GLU_103 | OE1 | 2.631 |
| 6F5U | B_ARG_559 | NH1 | A_GLU_103 | OE2 | 3.833 |
| 6F5U | B_ARG_559 | NH2 | A_GLU_103 | OE1 | 3.290 |
| 6F5U | B_ARG_559 | NH2 | A_GLU_103 | OE2 | 2.992 |
| 6F6I | B_LYS_510 | NZ  | A_GLU_292 | OE1 | 3.377 |
| 6F6I | B_ARG_559 | NH1 | A_GLU_103 | OE1 | 3.800 |
| 6F6I | B_ARG_559 | NH1 | A_GLU_103 | OE2 | 2.815 |
| 6F6I | B_ARG_559 | NH2 | A_GLU_103 | OE1 | 3.096 |
| 6F6I | B_ARG_559 | NH2 | A_GLU_103 | OE2 | 3.529 |
| 6F6N | B_LYS_510 | NZ  | A_GLU_292 | OE1 | 2.639 |
| 6F6N | B_ARG_559 | NH1 | A_GLU_103 | OE1 | 2.593 |
| 6F6N | B_ARG_559 | NH1 | A_GLU_103 | OE2 | 3.789 |
| 6F6N | B_ARG_559 | NH2 | A_GLU_103 | OE1 | 3.215 |
| 6F6N | B_ARG_559 | NH2 | A_GLU_103 | OE2 | 2.904 |
| 6F6N | B_LYS_588 | NZ  | A_ASP_47  | OD1 | 3.696 |
| 6F6N | B_LYS_588 | NZ  | A_ASP_47  | OD2 | 2.975 |
| 6F6S | B_LYS_510 | NZ  | A_GLU_292 | OE1 | 2.331 |
| 6F6S | B_LYS_510 | NZ  | A_GLU_292 | OE2 | 3.397 |
| 6F6S | B_ARG_559 | NH1 | A_GLU_103 | OE1 | 2.656 |
| 6F6S | B_ARG_559 | NH1 | A_GLU_103 | OE2 | 3.920 |
| 6F6S | B_ARG_559 | NH2 | A_GLU_103 | OE1 | 3.146 |
| 6F6S | B_ARG_559 | NH2 | A_GLU_103 | OE2 | 2.951 |
| 6F6S | B_LYS_588 | NZ  | A_ASP_47  | OD1 | 2.944 |
| 6F6S | B_LYS_588 | NZ  | A_ASP_47  | OD2 | 2.772 |
| 6G95 | B_ARG_559 | NH1 | A_GLU_103 | OE1 | 2.683 |
| 6G95 | B_ARG_559 | NH1 | A_GLU_103 | OE2 | 3.879 |
| 6G95 | B_ARG_559 | NH2 | A_GLU_103 | OE1 | 3.249 |
| 6G95 | B_ARG_559 | NH2 | A_GLU_103 | OE2 | 2.973 |
| 6G9B | B_LYS_510 | NZ  | A_GLU_292 | OE1 | 3.414 |
| 6G9B | B_ARG_559 | NH1 | A_GLU_103 | OE1 | 2.574 |
| 6G9B | B_ARG_559 | NH1 | A_GLU_103 | OE2 | 3.760 |
| 6G9B | B_ARG_559 | NH2 | A_GLU_103 | OE1 | 3.199 |
| 6G9B | B_ARG_559 | NH2 | A_GLU_103 | OE2 | 2.870 |
| 6G9B | B_LYS_588 | NZ  | A_ASP_47  | OD1 | 3.317 |
| 6G9B | B_LYS_588 | NZ  | A_ASP_47  | OD2 | 2.892 |
| 6G9I | B_ARG_559 | NH1 | A_GLU_103 | OE1 | 2.689 |
| 6G9I | B_ARG_559 | NH1 | A_GLU_103 | OE2 | 3.794 |
| 6G9I | B_ARG_559 | NH2 | A_GLU_103 | OE1 | 3.340 |
| 6G9I | B_ARG_559 | NH2 | A_GLU_103 | OE2 | 2.940 |
| 6HRO | B_LYS_510 | NZ  | A_GLU_292 | OE1 | 3.852 |
| 6HRO | B_ARG_559 | NH1 | A_GLU_103 | OE1 | 2.817 |
| 6HRO | B_ARG_559 | NH1 | A_GLU_103 | OE2 | 3.911 |
| 6HRO | B_ARG_559 | NH2 | A_GLU_103 | OE1 | 3.514 |
| 6HRO | B_ARG_559 | NH2 | A_GLU_103 | OE2 | 3.164 |
| 6HRO | B_LYS_588 | NZ  | A_ASP_47  | OD1 | 3.207 |
| 6HRO | B_LYS_588 | NZ  | A_ASP_47  | OD2 | 2.778 |
| 6HS4 | B_ARG_559 | NH1 | A_GLU_103 | OE1 | 2.624 |
| 6HS4 | B_ARG_559 | NH1 | A_GLU_103 | OE2 | 3.811 |
| 6HS4 | B_ARG_559 | NH2 | A_GLU_103 | OE1 | 3.176 |
| 6HS4 | B_ARG_559 | NH2 | A_GLU_103 | OE2 | 2.846 |
| 6HS4 | B_LYS_588 | NZ  | A_ASP_47  | OD1 | 3.053 |
| 6HS4 | B_LYS_588 | NZ  | A_ASP_47  | OD2 | 2.954 |
| 6MAM | A_LYS_227 | NZ  | B_GLU_125 | OE1 | 3.431 |
| 6MAM | C_HIS_182 | NE2 | D_ASP_169 | OD2 | 3.087 |
| 6MAM | C_LYS_227 | NZ  | D_GLU_125 | OE1 | 3.951 |
| 6MAM | H_ARG_559 | NH1 | G_GLU_103 | OE1 | 2.237 |
| 6MAM | H_ARG_559 | NH1 | G_GLU_103 | OE2 | 3.123 |

|      |           |     |           |     |       |
|------|-----------|-----|-----------|-----|-------|
| 6MAM | H_ARG_559 | NH2 | G_GLU_103 | OE1 | 3.565 |
| 6MAM | H_ARG_559 | NH2 | G_GLU_103 | OE2 | 2.826 |
| 6MAM | J_ARG_559 | NH1 | I_GLU_103 | OE1 | 2.281 |
| 6MAM | J_ARG_559 | NH1 | I_GLU_103 | OE2 | 3.223 |
| 6MAM | J_ARG_559 | NH2 | I_GLU_103 | OE1 | 3.504 |
| 6MAM | J_ARG_559 | NH2 | I_GLU_103 | OE2 | 2.826 |
| 6MAM | L_ARG_559 | NH1 | K_GLU_103 | OE1 | 2.658 |
| 6MAM | L_ARG_559 | NH1 | K_GLU_103 | OE2 | 3.420 |
| 6MAM | L_ARG_559 | NH2 | K_GLU_103 | OE1 | 3.722 |
| 6MAM | L_ARG_559 | NH2 | K_GLU_103 | OE2 | 2.995 |
| 6NAE | B_LYS_510 | NZ  | A_GLU_292 | OE1 | 2.350 |
| 6NAE | B_LYS_510 | NZ  | A_GLU_292 | OE2 | 3.768 |
| 6NAE | B_ARG_559 | NH1 | A_GLU_103 | OE1 | 2.669 |
| 6NAE | B_ARG_559 | NH1 | A_GLU_103 | OE2 | 3.739 |
| 6NAE | B_ARG_559 | NH2 | A_GLU_103 | OE1 | 3.488 |
| 6NAE | B_ARG_559 | NH2 | A_GLU_103 | OE2 | 3.068 |
| 6QD7 | L_ARG_91  | NH1 | D_GLU_502 | OE1 | 3.607 |
| 6QD7 | H_LYS_65  | NZ  | D_ASP_552 | OD1 | 3.151 |
| 6QD7 | H_LYS_65  | NZ  | D_ASP_552 | OD2 | 3.487 |
| 6QD7 | H_ARG_101 | NH1 | D_GLU_564 | OE1 | 3.838 |
| 6QD7 | H_ARG_101 | NH1 | D_GLU_564 | OE2 | 2.869 |
| 6QD7 | H_ARG_101 | NH2 | D_GLU_502 | OE1 | 3.497 |
| 6QD7 | H_ARG_101 | NH2 | D_GLU_502 | OE2 | 3.635 |
| 6QD7 | H_ARG_101 | NH2 | D_GLU_564 | OE1 | 3.061 |
| 6QD7 | H_ARG_101 | NH2 | D_GLU_564 | OE2 | 3.438 |
| 6QD7 | A_ARG_134 | NH1 | B_GLU_545 | OE2 | 3.138 |
| 6QD7 | B_ARG_559 | NH1 | A_GLU_103 | OE1 | 2.604 |
| 6QD7 | B_ARG_559 | NH1 | A_GLU_103 | OE2 | 3.895 |
| 6QD7 | B_ARG_559 | NH2 | A_GLU_103 | OE1 | 3.220 |
| 6QD7 | B_ARG_559 | NH2 | A_GLU_103 | OE2 | 3.089 |
| 6QD7 | B_LYS_588 | NZ  | A_ASP_47  | OD2 | 3.517 |
| 6QD7 | B_HIS_602 | ND1 | F_GLU_611 | OE2 | 2.318 |
| 6QD7 | C_ARG_134 | NH1 | D_GLU_545 | OE2 | 3.066 |
| 6QD7 | E_ARG_134 | NH1 | F_GLU_545 | OE2 | 2.931 |
| 6QD7 | D_ARG_559 | NH1 | C_GLU_103 | OE1 | 2.624 |
| 6QD7 | D_ARG_559 | NH1 | C_GLU_103 | OE2 | 3.858 |
| 6QD7 | D_ARG_559 | NH2 | C_GLU_103 | OE1 | 3.320 |
| 6QD7 | D_ARG_559 | NH2 | C_GLU_103 | OE2 | 3.132 |
| 6QD7 | D_LYS_588 | NZ  | C_ASP_47  | OD2 | 3.598 |
| 6QD7 | D_HIS_602 | ND1 | B_GLU_611 | OE2 | 2.828 |
| 6QD7 | F_ARG_559 | NH1 | E_GLU_103 | OE1 | 2.462 |
| 6QD7 | F_ARG_559 | NH1 | E_GLU_103 | OE2 | 3.800 |
| 6QD7 | F_ARG_559 | NH2 | E_GLU_103 | OE1 | 3.090 |
| 6QD7 | F_ARG_559 | NH2 | E_GLU_103 | OE2 | 2.951 |
| 6QD7 | F_LYS_588 | NZ  | E_ASP_47  | OD2 | 3.686 |
| 6QD7 | F_HIS_602 | ND1 | D_GLU_611 | OE2 | 2.771 |
| 6QD7 | X_LYS_65  | NZ  | F_ASP_552 | OD1 | 3.082 |
| 6QD7 | X_LYS_65  | NZ  | F_ASP_552 | OD2 | 3.701 |
| 6QD7 | X_ARG_101 | NH1 | F_GLU_564 | OE1 | 3.893 |
| 6QD7 | X_ARG_101 | NH1 | F_GLU_564 | OE2 | 2.816 |
| 6QD7 | X_ARG_101 | NH2 | F_GLU_502 | OE1 | 3.631 |
| 6QD7 | X_ARG_101 | NH2 | F_GLU_502 | OE2 | 3.812 |
| 6QD7 | X_ARG_101 | NH2 | F_GLU_564 | OE1 | 3.108 |
| 6QD7 | X_ARG_101 | NH2 | F_GLU_564 | OE2 | 3.371 |
| 6QD7 | U_LYS_65  | NZ  | B_ASP_552 | OD1 | 2.927 |
| 6QD7 | U_LYS_65  | NZ  | B_ASP_552 | OD2 | 3.579 |
| 6QD7 | U_ARG_101 | NH1 | B_GLU_564 | OE1 | 3.771 |
| 6QD7 | U_ARG_101 | NH1 | B_GLU_564 | OE2 | 2.902 |

|      |           |     |           |     |       |
|------|-----------|-----|-----------|-----|-------|
| 6QD7 | U_ARG_101 | NH2 | B_GLU_502 | OE1 | 3.404 |
| 6QD7 | U_ARG_101 | NH2 | B_GLU_502 | OE2 | 3.473 |
| 6QD7 | U_ARG_101 | NH2 | B_GLU_564 | OE1 | 3.146 |
| 6QD7 | U_ARG_101 | NH2 | B_GLU_564 | OE2 | 3.609 |
| 6QD7 | Z_ARG_91  | NH1 | F_GLU_502 | OE1 | 3.548 |
| 6QD7 | P_ARG_91  | NH1 | B_GLU_502 | OE1 | 3.467 |
| 6QD8 | Z_ARG_96  | NH1 | W_GLU_51  | OE1 | 3.187 |
| 6QD8 | Z_ARG_96  | NH1 | W_GLU_51  | OE2 | 3.722 |
| 6QD8 | A_ARG_64  | NH2 | B_ASP_522 | OD2 | 3.626 |
| 6QD8 | A_ARG_134 | NH1 | B_GLU_545 | OE2 | 3.117 |
| 6QD8 | Y_ARG_96  | NH1 | Q_GLU_51  | OE1 | 3.080 |
| 6QD8 | Y_ARG_96  | NH1 | Q_GLU_51  | OE2 | 3.529 |
| 6QD8 | B_ARG_559 | NH1 | A_GLU_103 | OE1 | 3.695 |
| 6QD8 | B_ARG_559 | NH1 | A_GLU_103 | OE2 | 2.598 |
| 6QD8 | B_ARG_559 | NH2 | A_GLU_103 | OE1 | 3.315 |
| 6QD8 | B_ARG_559 | NH2 | A_GLU_103 | OE2 | 3.288 |
| 6QD8 | B_HIS_602 | ND1 | F_GLU_611 | OE2 | 3.837 |
| 6QD8 | L_ARG_96  | NH1 | H_GLU_51  | OE1 | 3.060 |
| 6QD8 | L_ARG_96  | NH1 | H_GLU_51  | OE2 | 3.554 |
| 6QD8 | H_ARG_55  | NH1 | B_GLU_564 | OE1 | 2.303 |
| 6QD8 | H_ARG_55  | NH1 | B_GLU_564 | OE2 | 3.666 |
| 6QD8 | C_ARG_64  | NH2 | D_ASP_522 | OD2 | 3.747 |
| 6QD8 | C_ARG_134 | NH1 | D_GLU_545 | OE2 | 2.972 |
| 6QD8 | E_ARG_64  | NH2 | F_ASP_522 | OD2 | 3.901 |
| 6QD8 | E_ARG_134 | NH1 | F_GLU_545 | OE2 | 2.891 |
| 6QD8 | F_ARG_559 | NH1 | E_GLU_103 | OE1 | 3.653 |
| 6QD8 | F_ARG_559 | NH1 | E_GLU_103 | OE2 | 2.383 |
| 6QD8 | F_ARG_559 | NH2 | E_GLU_103 | OE1 | 3.116 |
| 6QD8 | F_ARG_559 | NH2 | E_GLU_103 | OE2 | 2.960 |
| 6QD8 | F_HIS_602 | ND1 | D_GLU_611 | OE2 | 3.980 |
| 6QD8 | D_ARG_559 | NH1 | C_GLU_103 | OE1 | 3.634 |
| 6QD8 | D_ARG_559 | NH1 | C_GLU_103 | OE2 | 2.515 |
| 6QD8 | D_ARG_559 | NH2 | C_GLU_103 | OE1 | 3.283 |
| 6QD8 | D_ARG_559 | NH2 | C_GLU_103 | OE2 | 3.254 |
| 6QD8 | D_HIS_602 | ND1 | B_GLU_611 | OE2 | 3.920 |
| 6QD8 | W_ARG_55  | NH1 | F_GLU_564 | OE1 | 2.296 |
| 6QD8 | W_ARG_55  | NH1 | F_GLU_564 | OE2 | 3.607 |
| 6QD8 | Q_ARG_55  | NH1 | D_GLU_564 | OE1 | 2.265 |
| 6QD8 | Q_ARG_55  | NH1 | D_GLU_564 | OE2 | 3.539 |
| 6S8D | H_ARG_30  | NH2 | P_ASP_104 | OD2 | 3.844 |
| 6S8D | B_ARG_559 | NH1 | A_GLU_103 | OE1 | 3.375 |
| 6S8D | B_ARG_559 | NH1 | A_GLU_103 | OE2 | 3.357 |
| 6S8D | B_ARG_559 | NH2 | A_GLU_103 | OE1 | 3.329 |
| 6S8D | B_ARG_596 | NH2 | A_ASP_55  | OD2 | 3.730 |
| 6S8D | D_ARG_559 | NH1 | C_GLU_103 | OE1 | 3.344 |
| 6S8D | D_ARG_559 | NH1 | C_GLU_103 | OE2 | 3.304 |
| 6S8D | D_ARG_559 | NH2 | C_GLU_103 | OE1 | 3.261 |
| 6S8D | D_ARG_559 | NH2 | C_GLU_103 | OE2 | 3.986 |
| 6S8D | D_ARG_596 | NH2 | C_ASP_55  | OD2 | 3.794 |
| 6S8D | F_ARG_559 | NH1 | E_GLU_103 | OE1 | 3.445 |
| 6S8D | F_ARG_559 | NH1 | E_GLU_103 | OE2 | 3.366 |
| 6S8D | F_ARG_559 | NH2 | E_GLU_103 | OE1 | 3.372 |
| 6S8D | F_ARG_596 | NH2 | E_ASP_55  | OD2 | 3.605 |
| 6S8D | E_LYS_114 | NZ  | Y_ASP_56  | OD2 | 3.842 |
| 6S8D | P_ARG_30  | NH2 | Y_ASP_104 | OD2 | 3.808 |
| 6S8D | Y_ARG_30  | NH2 | H_ASP_104 | OD2 | 3.626 |
| 6S8I | H_ARG_105 | NH1 | L_GLU_102 | OE1 | 3.601 |
| 6S8I | H_ARG_105 | NH1 | L_GLU_102 | OE2 | 3.239 |

|      |           |     |           |     |       |
|------|-----------|-----|-----------|-----|-------|
| 6S8I | H_ARG_105 | NH2 | L_GLU_102 | OE2 | 2.950 |
| 6S8I | A_LYS_114 | NZ  | H_ASP_56  | OD1 | 2.454 |
| 6S8I | A_LYS_114 | NZ  | H_ASP_56  | OD2 | 2.783 |
| 6S8I | A_ARG_134 | NH1 | B_GLU_545 | OE2 | 3.078 |
| 6S8I | B_ARG_559 | NH1 | A_GLU_103 | OE1 | 3.895 |
| 6S8I | B_ARG_559 | NH1 | A_GLU_103 | OE2 | 3.783 |
| 6S8I | B_ARG_559 | NH2 | A_GLU_103 | OE1 | 3.282 |
| 6S8I | B_ARG_559 | NH2 | A_GLU_103 | OE2 | 3.928 |
| 6S8I | B_ARG_596 | NH2 | A_ASP_55  | OD1 | 3.671 |
| 6S8I | D_ARG_559 | NH1 | C_GLU_103 | OE1 | 3.877 |
| 6S8I | D_ARG_559 | NH1 | C_GLU_103 | OE2 | 3.822 |
| 6S8I | D_ARG_559 | NH2 | C_GLU_103 | OE1 | 3.248 |
| 6S8I | D_ARG_559 | NH2 | C_GLU_103 | OE2 | 3.953 |
| 6S8I | D_ARG_596 | NH2 | C_ASP_55  | OD1 | 3.743 |
| 6S8I | F_ARG_559 | NH1 | E_GLU_103 | OE1 | 3.975 |
| 6S8I | F_ARG_559 | NH1 | E_GLU_103 | OE2 | 3.796 |
| 6S8I | F_ARG_559 | NH2 | E_GLU_103 | OE1 | 3.335 |
| 6S8I | F_ARG_559 | NH2 | E_GLU_103 | OE2 | 3.908 |
| 6S8I | F_ARG_596 | NH2 | E_ASP_55  | OD1 | 3.553 |
| 6S8I | C_LYS_114 | NZ  | P_ASP_56  | OD1 | 2.515 |
| 6S8I | C_LYS_114 | NZ  | P_ASP_56  | OD2 | 2.783 |
| 6S8I | C_ARG_134 | NH1 | D_GLU_545 | OE2 | 3.135 |
| 6S8I | E_LYS_114 | NZ  | Y_ASP_56  | OD1 | 2.476 |
| 6S8I | E_LYS_114 | NZ  | Y_ASP_56  | OD2 | 2.735 |
| 6S8I | E_ARG_134 | NH1 | F_GLU_545 | OE2 | 3.154 |
| 6S8I | P_ARG_105 | NH1 | O_GLU_102 | OE1 | 3.789 |
| 6S8I | P_ARG_105 | NH1 | O_GLU_102 | OE2 | 3.289 |
| 6S8I | P_ARG_105 | NH2 | O_GLU_102 | OE2 | 3.143 |
| 6S8I | Y_ARG_105 | NH1 | U_GLU_102 | OE1 | 3.606 |
| 6S8I | Y_ARG_105 | NH1 | U_GLU_102 | OE2 | 3.273 |
| 6S8I | Y_ARG_105 | NH2 | U_GLU_102 | OE2 | 2.978 |
| 6S8J | A_LYS_114 | NZ  | H_ASP_56  | OD1 | 3.168 |
| 6S8J | A_LYS_114 | NZ  | H_ASP_56  | OD2 | 2.312 |
| 6S8J | A_ARG_134 | NH1 | B_GLU_545 | OE2 | 2.814 |
| 6S8J | B_ARG_559 | NH1 | A_GLU_103 | OE1 | 3.955 |
| 6S8J | B_ARG_559 | NH1 | A_GLU_103 | OE2 | 3.604 |
| 6S8J | B_ARG_559 | NH2 | A_GLU_103 | OE1 | 3.443 |
| 6S8J | B_ARG_559 | NH2 | A_GLU_103 | OE2 | 3.830 |
| 6S8J | B_ARG_596 | NH2 | A_ASP_55  | OD1 | 2.986 |
| 6S8J | B_ARG_596 | NH2 | A_ASP_55  | OD2 | 3.529 |
| 6S8J | D_ARG_559 | NH1 | C_GLU_103 | OE1 | 3.872 |
| 6S8J | D_ARG_559 | NH1 | C_GLU_103 | OE2 | 3.635 |
| 6S8J | D_ARG_559 | NH2 | C_GLU_103 | OE1 | 3.272 |
| 6S8J | D_ARG_559 | NH2 | C_GLU_103 | OE2 | 3.792 |
| 6S8J | D_ARG_596 | NH2 | C_ASP_55  | OD1 | 2.928 |
| 6S8J | D_ARG_596 | NH2 | C_ASP_55  | OD2 | 3.762 |
| 6S8J | D_HIS_602 | ND1 | B_GLU_611 | OE1 | 3.866 |
| 6S8J | D_HIS_602 | NE2 | B_GLU_611 | OE1 | 3.805 |
| 6S8J | D_HIS_602 | NE2 | B_GLU_611 | OE2 | 3.737 |
| 6S8J | F_ARG_559 | NH1 | E_GLU_103 | OE1 | 3.993 |
| 6S8J | F_ARG_559 | NH1 | E_GLU_103 | OE2 | 3.748 |
| 6S8J | F_ARG_559 | NH2 | E_GLU_103 | OE1 | 3.468 |
| 6S8J | F_ARG_559 | NH2 | E_GLU_103 | OE2 | 3.952 |
| 6S8J | F_ARG_596 | NH2 | E_ASP_55  | OD1 | 2.985 |
| 6S8J | F_ARG_596 | NH2 | E_ASP_55  | OD2 | 3.707 |
| 6S8J | F_HIS_602 | ND1 | D_GLU_611 | OE1 | 3.880 |
| 6S8J | F_HIS_602 | NE2 | D_GLU_611 | OE2 | 3.765 |
| 6S8J | C_LYS_114 | NZ  | P_ASP_56  | OD1 | 3.173 |

|      |           |     |           |     |       |
|------|-----------|-----|-----------|-----|-------|
| 6S8J | C_LYS_114 | NZ  | P_ASP_56  | OD2 | 2.252 |
| 6S8J | C_ARG_134 | NH1 | D_GLU_545 | OE2 | 2.837 |
| 6S8J | E_LYS_114 | NZ  | Y_ASP_56  | OD1 | 3.177 |
| 6S8J | E_LYS_114 | NZ  | Y_ASP_56  | OD2 | 2.185 |
| 6S8J | E_ARG_134 | NH1 | F_GLU_545 | OE2 | 2.997 |

Table 5: Interfacial salt bridging network analysis within the PDB entries. In this table, the residue naming scheme is **Chain ID\_residue name\_residue number**.

| Count | Residue A | Residue B |
|-------|-----------|-----------|
| 191   | ARG559    | GLU103    |
| 23    | LYS588    | ASP47     |
| 22    | ARG134    | GLU545    |
| 17    | HIS602    | GLU611    |
| 15    | ARG596    | ASP55     |
| 15    | LYS221    | GLU123    |
| 13    | LYS114    | ASP56     |
| 12    | ARG101    | GLU564    |
| 12    | LYS510    | GLU292    |
| 9     | LYS272    | ASP54     |
| 9     | ARG105    | GLU102    |
| 9     | HIS96     | GLU55     |
| 7     | LYS272    | ASP56     |
| 7     | HIS112    | GLU77     |
| 6     | ARG55     | GLU564    |
| 6     | LYS65     | ASP552    |
| 6     | ARG96     | GLU51     |
| 6     | ARG101    | GLU502    |
| 5     | LYS510    | GLU55     |
| 5     | HIS173    | ASP166    |
| 4     | LYS510    | GLU56     |
| 4     | LYS209    | GLU123    |
| 4     | HIS100    | GLU55     |
| 4     | LYS26     | GLU21     |
| 4     | HIS108    | ASP50     |
| 4     | LYS87     | ASP106    |
| 4     | HIS613    | GLU578    |
| 3     | ARG100    | GLU50     |
| 3     | ARG130    | GLU540    |
| 3     | ARG64     | ASP522    |
| 3     | HIS172    | ASP167    |
| 3     | ARG91     | GLU502    |
| 3     | ARG30     | ASP104    |
| 2     | HIS164    | GLU168    |
| 2     | LYS208    | GLU127    |
| 2     | LYS208    | GLU124    |
| 2     | LYS214    | GLU123    |
| 2     | HIS549    | ASP52     |
| 2     | LYS227    | GLU125    |
| 2     | ARG98     | GLU44     |
| 2     | LYS204    | ASP130    |
| 2     | LYS62     | ASP1      |
| 1     | HIS407    | ASP92     |
| 1     | LYS155    | ASP502    |
| 1     | ARG409    | ASP33     |
| 1     | LYS218    | GLU122    |
| 1     | HIS182    | ASP169    |
| 1     | LYS143    | GLU125    |
| 1     | LYS143    | GLU124    |
| 1     | ARG595    | ASP49     |
| 1     | LYS7      | GLU9      |

Table 6: Counting of interfacial salt bridges within the PDB entries in Table 5.

| PDB ID | Residue A | Atom A | Residue B | Atom B | Distance (Å) |
|--------|-----------|--------|-----------|--------|--------------|
| 1EBO   | A_LYS_14  | NZ     | A_GLU_10  | OE2    | 3.109        |
| 1EBO   | A_ARG_79  | NH1    | A_ASP_113 | OD1    | 3.914        |
| 1EBO   | A_LYS_87  | NZ     | C_ASP_106 | OD2    | 3.887        |
| 1EBO   | A_HIS_112 | ND1    | B_GLU_77  | OE1    | 3.658        |
| 1EBO   | A_HIS_112 | ND1    | B_GLU_77  | OE2    | 3.104        |
| 1EBO   | A_LYS_116 | NZ     | A_ASP_120 | OD1    | 3.258        |
| 1EBO   | A_HIS_127 | ND1    | A_ASP_128 | OD1    | 2.733        |
| 1EBO   | B_LYS_14  | NZ     | B_GLU_10  | OE2    | 3.661        |
| 1EBO   | B_ARG_79  | NH1    | B_ASP_113 | OD1    | 3.995        |
| 1EBO   | B_HIS_112 | ND1    | C_GLU_77  | OE1    | 3.068        |
| 1EBO   | B_HIS_112 | ND1    | C_GLU_77  | OE2    | 2.658        |
| 1EBO   | B_LYS_116 | NZ     | B_ASP_120 | OD1    | 3.905        |
| 1EBO   | B_LYS_116 | NZ     | B_ASP_120 | OD2    | 3.784        |
| 1EBO   | B_HIS_127 | ND1    | B_ASP_128 | OD1    | 2.787        |
| 1EBO   | C_LYS_7   | NZ     | B_GLU_9   | OE1    | 3.472        |
| 1EBO   | C_LYS_14  | NZ     | C_GLU_10  | OE2    | 3.363        |
| 1EBO   | C_HIS_17  | NE2    | C_GLU_21  | OE2    | 3.656        |
| 1EBO   | C_LYS_26  | NZ     | A_GLU_21  | OE1    | 2.847        |
| 1EBO   | C_LYS_26  | NZ     | A_GLU_21  | OE2    | 3.880        |
| 1EBO   | C_ARG_79  | NH1    | C_ASP_113 | OD1    | 3.945        |
| 1EBO   | C_ARG_79  | NH2    | C_GLU_110 | OE2    | 3.323        |
| 1EBO   | C_LYS_87  | NZ     | B_ASP_106 | OD2    | 3.920        |
| 1EBO   | C_LYS_116 | NZ     | C_ASP_120 | OD1    | 3.226        |
| 1EBO   | C_HIS_127 | ND1    | C_ASP_128 | OD1    | 3.507        |
| 1EBO   | D_ARG_24  | NH1    | D_GLU_21  | OE2    | 3.453        |
| 1EBO   | D_HIS_112 | ND1    | E_GLU_77  | OE1    | 3.490        |
| 1EBO   | D_HIS_112 | ND1    | E_GLU_77  | OE2    | 2.696        |
| 1EBO   | D_HIS_127 | ND1    | D_ASP_128 | OD1    | 2.959        |
| 1EBO   | E_LYS_26  | NZ     | F_GLU_21  | OE2    | 3.162        |
| 1EBO   | E_ARG_79  | NH2    | E_GLU_110 | OE1    | 3.971        |
| 1EBO   | E_LYS_87  | NZ     | D_ASP_106 | OD2    | 3.925        |
| 1EBO   | E_LYS_116 | NZ     | E_ASP_120 | OD1    | 3.470        |
| 1EBO   | E_HIS_127 | ND1    | E_ASP_128 | OD1    | 2.619        |
| 1EBO   | F_LYS_26  | NZ     | D_GLU_21  | OE1    | 3.927        |
| 1EBO   | F_LYS_87  | NZ     | E_ASP_106 | OD2    | 3.651        |
| 1EBO   | F_HIS_112 | ND1    | D_GLU_77  | OE2    | 3.188        |
| 1EBO   | F_HIS_127 | ND1    | F_ASP_128 | OD1    | 2.746        |

Table 7: 1EBO-specific salt bridging network analysis. In this table, the residue naming scheme is **Chain ID\_residue name\_residue number**

| PDB ID | Residue A | Atom A | Residue B | Atom B | Distance (Å) |
|--------|-----------|--------|-----------|--------|--------------|
| 2EBO   | A_HIS_613 | ND1    | B_GLU_578 | OE1    | 3.396        |
| 2EBO   | A_HIS_613 | ND1    | B_GLU_578 | OE2    | 3.211        |
| 2EBO   | A_LYS_617 | NZ     | A_ASP_621 | OD2    | 2.696        |
| 2EBO   | B_ARG_580 | NH1    | B_ASP_614 | OD2    | 3.885        |
| 2EBO   | B_HIS_613 | ND1    | C_GLU_578 | OE1    | 3.346        |
| 2EBO   | B_HIS_613 | ND1    | C_GLU_578 | OE2    | 2.789        |
| 2EBO   | C_HIS_628 | ND1    | C_ASP_629 | OD1    | 2.824        |

Table 8: 2EBO-specific salt bridging network analysis. In this table, the residue naming scheme is **Chain ID\_residue name\_residue number**

| PDB ID | Residue A | Atom A | Residue B | Atom B | Distance (Å) |
|--------|-----------|--------|-----------|--------|--------------|
| 2QHR   | H_ARG_38  | NH1    | H_GLU_46  | OE1    | 2.994        |
| 2QHR   | H_ARG_38  | NH1    | H_GLU_46  | OE2    | 3.872        |
| 2QHR   | H_ARG_38  | NH1    | H_ASP_86  | OD1    | 3.831        |
| 2QHR   | H_ARG_38  | NH2    | H_ASP_86  | OD1    | 2.870        |
| 2QHR   | H_ARG_66  | NH1    | H_ASP_86  | OD1    | 3.110        |
| 2QHR   | H_ARG_66  | NH1    | H_ASP_86  | OD2    | 3.628        |
| 2QHR   | H_ARG_66  | NH2    | H_ASP_86  | OD1    | 3.793        |
| 2QHR   | H_ARG_66  | NH2    | H_ASP_86  | OD2    | 2.806        |
| 2QHR   | H_ARG_94  | NH2    | H_ASP_101 | OD1    | 3.235        |
| 2QHR   | H_ARG_94  | NH2    | H_ASP_101 | OD2    | 2.743        |
| 2QHR   | H_LYS_143 | NZ     | L_GLU_125 | OE2    | 2.743        |
| 2QHR   | H_HIS_164 | ND1    | L_GLU_168 | OE1    | 3.446        |
| 2QHR   | H_HIS_164 | ND1    | L_GLU_168 | OE2    | 2.691        |
| 2QHR   | H_LYS_205 | NZ     | H_ASP_207 | OD2    | 3.730        |
| 2QHR   | H_LYS_208 | NZ     | L_GLU_124 | OE1    | 3.025        |
| 2QHR   | H_LYS_208 | NZ     | L_GLU_124 | OE2    | 3.278        |
| 2QHR   | L_ARG_61  | NH1    | L_ASP_82  | OD1    | 3.738        |
| 2QHR   | L_ARG_61  | NH1    | L_ASP_82  | OD2    | 2.709        |
| 2QHR   | L_ARG_61  | NH2    | L_ASP_82  | OD1    | 3.238        |
| 2QHR   | L_ARG_61  | NH2    | L_ASP_82  | OD2    | 3.549        |
| 2QHR   | L_LYS_111 | NZ     | L_ASP_200 | OD2    | 3.160        |
| 2QHR   | L_LYS_150 | NZ     | L_GLU_203 | OE2    | 3.712        |
| 2QHR   | L_LYS_167 | NZ     | L_GLU_83  | OE1    | 3.792        |
| 2QHR   | L_HIS_179 | ND1    | L_ASP_161 | OD2    | 3.673        |
| 2QHR   | L_LYS_204 | NZ     | H_ASP_130 | OD1    | 2.837        |
| 2QHR   | L_LYS_204 | NZ     | H_ASP_130 | OD2    | 3.813        |
| 2QHR   | P_HIS_407 | ND1    | L_ASP_92  | OD1    | 3.553        |
| 2QHR   | P_ARG_409 | NH1    | H_ASP_33  | OD2    | 2.967        |
| 2QHR   | P_ARG_410 | NH1    | P_ASP_414 | OD1    | 3.195        |
| 2QHR   | P_ARG_410 | NH1    | P_ASP_414 | OD2    | 3.569        |

Table 9: 2QHR-specific salt bridging network analysis. In this table, the residue naming scheme is **Chain ID\_residue name\_residue number**

| PDB ID | Residue A | Atom A | Residue B | Atom B | Distance (Å) |
|--------|-----------|--------|-----------|--------|--------------|
| 2Y6S   | C_ARG.65  | NH1    | C_GLU.83  | OE1    | 3.999        |
| 2Y6S   | C_ARG.65  | NH1    | C_GLU.85  | OE2    | 3.669        |
| 2Y6S   | C_ARG.65  | NH1    | C_ASP.86  | OD1    | 2.662        |
| 2Y6S   | C_ARG.65  | NH1    | C_ASP.86  | OD2    | 2.895        |
| 2Y6S   | C_ARG.65  | NH2    | C_GLU.83  | OE1    | 3.359        |
| 2Y6S   | C_ARG.65  | NH2    | C_GLU.83  | OE2    | 2.893        |
| 2Y6S   | C_ARG.65  | NH2    | C_GLU.85  | OE2    | 3.603        |
| 2Y6S   | C_ARG.100 | NH1    | D_GLU.50  | OE1    | 2.758        |
| 2Y6S   | C_LYS.107 | NZ     | C_GLU.109 | OE2    | 3.166        |
| 2Y6S   | C_LYS.107 | NZ     | C_ASP.169 | OD1    | 3.905        |
| 2Y6S   | C_LYS.146 | NZ     | C_GLU.109 | OE1    | 2.925        |
| 2Y6S   | C_LYS.146 | NZ     | C_GLU.109 | OE2    | 3.794        |
| 2Y6S   | C_LYS.153 | NZ     | C_GLU.199 | OE2    | 3.238        |
| 2Y6S   | C_ARG.159 | NH2    | C_GLU.189 | OE1    | 2.973        |
| 2Y6S   | C_LYS.187 | NZ     | C_GLU.191 | OE1    | 3.081        |
| 2Y6S   | C_LYS.187 | NZ     | C_GLU.191 | OE2    | 3.018        |
| 2Y6S   | C_HIS.193 | ND1    | C_ASP.155 | OD2    | 3.103        |
| 2Y6S   | C_LYS.203 | NZ     | C_ASP.114 | OD2    | 2.593        |
| 2Y6S   | D_ARG.67  | NH1    | D_ASP.90  | OD1    | 2.837        |
| 2Y6S   | D_ARG.67  | NH1    | D_ASP.90  | OD2    | 2.696        |
| 2Y6S   | D_LYS.74  | NZ     | D_ASP.56  | OD1    | 3.129        |
| 2Y6S   | D_LYS.74  | NZ     | D_ASP.56  | OD2    | 3.876        |
| 2Y6S   | D_LYS.208 | NZ     | C_GLU.127 | OE1    | 3.225        |
| 2Y6S   | H_ARG.67  | NH1    | H_ASP.90  | OD1    | 2.838        |
| 2Y6S   | H_ARG.67  | NH1    | H_ASP.90  | OD2    | 2.694        |
| 2Y6S   | H_LYS.74  | NZ     | H_ASP.56  | OD1    | 3.138        |
| 2Y6S   | H_LYS.74  | NZ     | H_ASP.56  | OD2    | 3.860        |
| 2Y6S   | H_LYS.208 | NZ     | L_GLU.127 | OE1    | 3.152        |
| 2Y6S   | L_ARG.65  | NH1    | L_GLU.85  | OE2    | 3.674        |
| 2Y6S   | L_ARG.65  | NH1    | L_ASP.86  | OD1    | 2.664        |
| 2Y6S   | L_ARG.65  | NH1    | L_ASP.86  | OD2    | 2.893        |
| 2Y6S   | L_ARG.65  | NH2    | L_GLU.83  | OE1    | 3.384        |
| 2Y6S   | L_ARG.65  | NH2    | L_GLU.83  | OE2    | 2.916        |
| 2Y6S   | L_ARG.65  | NH2    | L_GLU.85  | OE2    | 3.600        |
| 2Y6S   | L_ARG.100 | NH1    | H_GLU.50  | OE1    | 2.759        |
| 2Y6S   | L_ARG.100 | NH2    | H_GLU.50  | OE1    | 3.945        |
| 2Y6S   | L_LYS.107 | NZ     | L_GLU.109 | OE2    | 3.165        |
| 2Y6S   | L_LYS.107 | NZ     | L_ASP.169 | OD1    | 3.901        |
| 2Y6S   | L_LYS.146 | NZ     | L_GLU.109 | OE1    | 2.917        |
| 2Y6S   | L_LYS.146 | NZ     | L_GLU.109 | OE2    | 3.793        |
| 2Y6S   | L_LYS.153 | NZ     | L_GLU.199 | OE2    | 3.234        |
| 2Y6S   | L_ARG.159 | NH2    | L_GLU.189 | OE1    | 2.963        |
| 2Y6S   | L_LYS.187 | NZ     | L_GLU.191 | OE1    | 3.077        |
| 2Y6S   | L_LYS.187 | NZ     | L_GLU.191 | OE2    | 3.017        |
| 2Y6S   | L_HIS.193 | ND1    | L_ASP.155 | OD2    | 3.115        |
| 2Y6S   | L_LYS.203 | NZ     | L_ASP.114 | OD2    | 2.587        |

Table 10: 2Y6S-specific salt bridging network analysis. In this table, the residue naming scheme is **Chain ID\_residue name\_residue number**

| PDB ID | Residue A | Atom A | Residue B  | Atom B | Distance (Å) |
|--------|-----------|--------|------------|--------|--------------|
| 3CSY   | A_ARG_33  | NH1    | A_GLU_95   | OE1    | 3.330        |
| 3CSY   | A_ARG_33  | NH1    | A_GLU_95   | OE2    | 3.449        |
| 3CSY   | A_ARG_38  | NH1    | A_GLU_46   | OE2    | 2.868        |
| 3CSY   | A_ARG_38  | NH2    | A_ASP_86   | OD1    | 2.786        |
| 3CSY   | A_ARG_66  | NH1    | A_ASP_86   | OD1    | 3.738        |
| 3CSY   | A_ARG_66  | NH1    | A_ASP_86   | OD2    | 2.985        |
| 3CSY   | A_ARG_66  | NH2    | A_ASP_86   | OD1    | 3.541        |
| 3CSY   | A_ARG_94  | NH2    | A_ASP_101  | OD1    | 3.102        |
| 3CSY   | A_ARG_94  | NH2    | A_ASP_101  | OD2    | 3.588        |
| 3CSY   | A_ARG_98  | NH1    | A_ASP_100F | OD1    | 2.690        |
| 3CSY   | A_ARG_98  | NH1    | A_ASP_100F | OD2    | 3.265        |
| 3CSY   | A_LYS_145 | NZ     | A_ASP_146  | OD1    | 3.667        |
| 3CSY   | A_LYS_145 | NZ     | A_ASP_146  | OD2    | 3.424        |
| 3CSY   | A_LYS_221 | NZ     | B_GLU_123  | OE1    | 3.090        |
| 3CSY   | A_LYS_221 | NZ     | B_GLU_123  | OE2    | 3.307        |
| 3CSY   | A_LYS_222 | NZ     | A_GLU_226  | OE1    | 3.338        |
| 3CSY   | B_LYS_24  | NZ     | B_ASP_70   | OD1    | 3.112        |
| 3CSY   | B_LYS_24  | NZ     | B_ASP_70   | OD2    | 3.834        |
| 3CSY   | B_ARG_61  | NH2    | B_GLU_81   | OE1    | 3.999        |
| 3CSY   | B_ARG_61  | NH2    | B_ASP_82   | OD1    | 3.114        |
| 3CSY   | B_ARG_61  | NH2    | B_ASP_82   | OD2    | 3.791        |
| 3CSY   | B_ARG_142 | NH2    | B_GLU_165  | OE1    | 3.547        |
| 3CSY   | B_LYS_149 | NZ     | B_GLU_195  | OE1    | 2.968        |
| 3CSY   | B_LYS_188 | NZ     | B_ASP_185  | OD1    | 3.323        |
| 3CSY   | B_HIS_189 | ND1    | B_ASP_151  | OD1    | 3.608        |
| 3CSY   | B_HIS_189 | ND1    | B_ASP_151  | OD2    | 2.713        |
| 3CSY   | C_ARG_33  | NH2    | C_GLU_95   | OE1    | 3.005        |
| 3CSY   | C_ARG_33  | NH2    | C_GLU_95   | OE2    | 3.100        |
| 3CSY   | C_ARG_38  | NH1    | C_GLU_46   | OE2    | 3.062        |
| 3CSY   | C_ARG_38  | NH2    | C_ASP_86   | OD1    | 2.925        |
| 3CSY   | C_ARG_66  | NH1    | C_ASP_86   | OD1    | 3.795        |
| 3CSY   | C_ARG_66  | NH1    | C_ASP_86   | OD2    | 3.175        |
| 3CSY   | C_ARG_66  | NH2    | C_ASP_86   | OD1    | 3.757        |
| 3CSY   | C_ARG_94  | NH2    | C_ASP_101  | OD1    | 2.980        |
| 3CSY   | C_ARG_94  | NH2    | C_ASP_101  | OD2    | 3.244        |
| 3CSY   | C_ARG_98  | NH1    | C_ASP_100F | OD1    | 2.963        |
| 3CSY   | C_ARG_98  | NH1    | C_ASP_100F | OD2    | 3.539        |
| 3CSY   | C_LYS_145 | NZ     | C_ASP_146  | OD1    | 3.956        |
| 3CSY   | C_LYS_172 | NE2    | D_ASP_167  | OD2    | 3.885        |
| 3CSY   | C_LYS_221 | NZ     | D_GLU_123  | OE1    | 3.258        |
| 3CSY   | C_LYS_221 | NZ     | D_GLU_123  | OE2    | 3.282        |
| 3CSY   | C_LYS_222 | NZ     | C_GLU_226  | OE1    | 3.372        |
| 3CSY   | D_LYS_24  | NZ     | D_ASP_70   | OD1    | 3.251        |
| 3CSY   | D_LYS_24  | NZ     | D_ASP_70   | OD2    | 3.569        |
| 3CSY   | D_ARG_61  | NH2    | D_ASP_82   | OD1    | 3.121        |
| 3CSY   | D_ARG_61  | NH2    | D_ASP_82   | OD2    | 3.757        |
| 3CSY   | D_ARG_142 | NH2    | D_GLU_165  | OE1    | 3.115        |
| 3CSY   | D_LYS_149 | NZ     | D_GLU_195  | OE1    | 3.045        |
| 3CSY   | D_HIS_189 | ND1    | D_ASP_151  | OD1    | 3.792        |
| 3CSY   | D_HIS_189 | ND1    | D_ASP_151  | OD2    | 2.842        |
| 3CSY   | E_ARG_33  | NH2    | E_GLU_95   | OE1    | 3.422        |
| 3CSY   | E_ARG_33  | NH2    | E_GLU_95   | OE2    | 3.409        |
| 3CSY   | E_ARG_38  | NH1    | E_GLU_46   | OE2    | 2.948        |
| 3CSY   | E_ARG_38  | NH2    | E_ASP_86   | OD1    | 3.088        |
| 3CSY   | E_ARG_66  | NH1    | E_ASP_86   | OD2    | 2.937        |
| 3CSY   | E_ARG_66  | NH2    | E_ASP_86   | OD1    | 3.488        |
| 3CSY   | E_ARG_66  | NH2    | E_ASP_86   | OD2    | 3.575        |

|      |           |     |            |     |       |
|------|-----------|-----|------------|-----|-------|
| 3CSY | E_ARG_94  | NH2 | E_ASP_101  | OD1 | 3.133 |
| 3CSY | E_ARG_94  | NH2 | E_ASP_101  | OD2 | 3.533 |
| 3CSY | E_ARG_98  | NH1 | E_ASP_100F | OD1 | 3.332 |
| 3CSY | E_ARG_98  | NH1 | E_ASP_100F | OD2 | 3.049 |
| 3CSY | E_LYS_145 | NZ  | E_ASP_146  | OD2 | 3.678 |
| 3CSY | E_LYS_221 | NZ  | F_GLU_123  | OE1 | 3.238 |
| 3CSY | E_LYS_221 | NZ  | F_GLU_123  | OE2 | 3.205 |
| 3CSY | E_LYS_222 | NZ  | E_GLU_226  | OE1 | 3.405 |
| 3CSY | F_LYS_24  | NZ  | F_ASP_70   | OD1 | 3.269 |
| 3CSY | F_LYS_24  | NZ  | F_ASP_70   | OD2 | 3.477 |
| 3CSY | F_ARG_61  | NH2 | F_GLU_81   | OE1 | 3.492 |
| 3CSY | F_ARG_61  | NH2 | F_ASP_82   | OD1 | 3.832 |
| 3CSY | F_ARG_142 | NH2 | F_GLU_165  | OE1 | 3.343 |
| 3CSY | F_LYS_149 | NZ  | F_GLU_195  | OE1 | 3.168 |
| 3CSY | F_LYS_188 | NZ  | F_ASP_185  | OD1 | 3.831 |
| 3CSY | F_HIS_189 | ND1 | F_ASP_151  | OD2 | 3.133 |
| 3CSY | G_ARG_33  | NH2 | G_GLU_95   | OE1 | 3.360 |
| 3CSY | G_ARG_33  | NH2 | G_GLU_95   | OE2 | 3.356 |
| 3CSY | G_ARG_38  | NH1 | G_GLU_46   | OE1 | 3.934 |
| 3CSY | G_ARG_38  | NH1 | G_GLU_46   | OE2 | 3.037 |
| 3CSY | G_ARG_38  | NH2 | G_ASP_86   | OD1 | 2.730 |
| 3CSY | G_ARG_66  | NH1 | G_ASP_86   | OD2 | 2.862 |
| 3CSY | G_ARG_66  | NH2 | G_ASP_86   | OD1 | 3.483 |
| 3CSY | G_ARG_66  | NH2 | G_ASP_86   | OD2 | 3.538 |
| 3CSY | G_ARG_94  | NH2 | G_ASP_101  | OD1 | 3.059 |
| 3CSY | G_ARG_98  | NH1 | G_ASP_100F | OD1 | 2.838 |
| 3CSY | G_ARG_98  | NH1 | G_ASP_100F | OD2 | 3.524 |
| 3CSY | G_LYS_145 | NZ  | G_ASP_146  | OD2 | 3.536 |
| 3CSY | G_HIS_172 | NE2 | H_ASP_167  | OD2 | 3.733 |
| 3CSY | G_LYS_221 | NZ  | H_GLU_123  | OE1 | 3.440 |
| 3CSY | G_LYS_221 | NZ  | H_GLU_123  | OE2 | 3.445 |
| 3CSY | G_LYS_222 | NZ  | G_GLU_226  | OE1 | 3.676 |
| 3CSY | H_LYS_24  | NZ  | H_ASP_70   | OD1 | 3.595 |
| 3CSY | H_LYS_24  | NZ  | H_ASP_70   | OD2 | 3.439 |
| 3CSY | H_ARG_61  | NH2 | H_GLU_81   | OE1 | 3.520 |
| 3CSY | H_ARG_61  | NH2 | H_ASP_82   | OD1 | 3.815 |
| 3CSY | H_ARG_61  | NH2 | H_ASP_82   | OD2 | 3.245 |
| 3CSY | H_ARG_142 | NH2 | H_GLU_165  | OE1 | 3.557 |
| 3CSY | H_LYS_149 | NZ  | H_GLU_195  | OE1 | 3.085 |
| 3CSY | H_HIS_189 | ND1 | H_ASP_151  | OD1 | 3.553 |
| 3CSY | H_HIS_189 | ND1 | H_ASP_151  | OD2 | 2.707 |
| 3CSY | I_ARG_64  | NH1 | I_GLU_100  | OE2 | 2.693 |
| 3CSY | I_ARG_85  | NH2 | I_GLU_178  | OE1 | 2.760 |
| 3CSY | I_ARG_85  | NH2 | I_GLU_178  | OE2 | 2.883 |
| 3CSY | I_LYS_114 | NZ  | I_GLU_120  | OE2 | 3.520 |
| 3CSY | I_ARG_130 | NH2 | I_ASP_163  | OD2 | 2.701 |
| 3CSY | I_ARG_134 | NH1 | J_GLU_545  | OE2 | 3.043 |
| 3CSY | I_ARG_136 | NH1 | I_GLU_106  | OE2 | 3.755 |
| 3CSY | I_HIS_154 | NE2 | I_GLU_178  | OE2 | 2.796 |
| 3CSY | I_ARG_164 | NH2 | I_ASP_163  | OD1 | 3.175 |
| 3CSY | I_ARG_164 | NH2 | I_ASP_163  | OD2 | 3.157 |
| 3CSY | J_ARG_559 | NH2 | I_GLU_103  | OE1 | 3.261 |
| 3CSY | J_ARG_559 | NH2 | I_GLU_103  | OE2 | 3.005 |
| 3CSY | K_ARG_64  | NH1 | K_GLU_100  | OE2 | 3.248 |
| 3CSY | K_ARG_85  | NH2 | K_GLU_178  | OE1 | 2.723 |
| 3CSY | K_ARG_85  | NH2 | K_GLU_178  | OE2 | 3.019 |
| 3CSY | K_LYS_114 | NZ  | K_GLU_120  | OE1 | 3.499 |
| 3CSY | K_ARG_130 | NH1 | K_ASP_163  | OD2 | 2.845 |

|      |           |     |           |     |       |
|------|-----------|-----|-----------|-----|-------|
| 3CSY | K_ARG_134 | NH1 | L_GLU_545 | OE2 | 3.181 |
| 3CSY | K_ARG_136 | NH1 | K_GLU_106 | OE2 | 3.184 |
| 3CSY | K_HIS_154 | NE2 | K_GLU_178 | OE2 | 2.720 |
| 3CSY | K_ARG_164 | NH2 | K_ASP_163 | OD1 | 3.547 |
| 3CSY | K_ARG_164 | NH2 | K_ASP_163 | OD2 | 3.244 |
| 3CSY | L_ARG_559 | NH2 | K_GLU_103 | OE1 | 3.317 |
| 3CSY | L_ARG_559 | NH2 | K_GLU_103 | OE2 | 3.156 |
| 3CSY | M_ARG_64  | NH1 | M_GLU_100 | OE2 | 2.845 |
| 3CSY | M_ARG_85  | NH2 | M_GLU_178 | OE1 | 2.759 |
| 3CSY | M_ARG_85  | NH2 | M_GLU_178 | OE2 | 3.004 |
| 3CSY | M_ARG_130 | NH1 | M_ASP_163 | OD2 | 2.888 |
| 3CSY | M_ARG_134 | NH1 | N_GLU_545 | OE2 | 2.894 |
| 3CSY | M_ARG_136 | NH1 | M_GLU_106 | OE2 | 3.351 |
| 3CSY | M_HIS_154 | NE2 | M_GLU_178 | OE2 | 2.684 |
| 3CSY | M_ARG_164 | NH2 | M_ASP_163 | OD1 | 3.214 |
| 3CSY | M_ARG_164 | NH2 | M_ASP_163 | OD2 | 3.477 |
| 3CSY | N_ARG_559 | NH2 | M_GLU_103 | OE1 | 2.925 |
| 3CSY | N_ARG_559 | NH2 | M_GLU_103 | OE2 | 3.048 |
| 3CSY | O_ARG_64  | NH1 | O_GLU_100 | OE2 | 2.902 |
| 3CSY | O_ARG_85  | NH2 | O_GLU_178 | OE1 | 3.008 |
| 3CSY | O_ARG_85  | NH2 | O_GLU_178 | OE2 | 3.292 |
| 3CSY | O_ARG_130 | NH1 | O_ASP_163 | OD2 | 2.770 |
| 3CSY | O_ARG_130 | NH2 | O_ASP_163 | OD2 | 3.071 |
| 3CSY | O_ARG_134 | NH1 | P_GLU_545 | OE2 | 3.026 |
| 3CSY | O_ARG_136 | NH1 | O_GLU_106 | OE2 | 3.514 |
| 3CSY | O_HIS_154 | NE2 | O_GLU_178 | OE2 | 2.770 |
| 3CSY | O_ARG_164 | NH2 | O_ASP_163 | OD1 | 3.340 |
| 3CSY | O_ARG_164 | NH2 | O_ASP_163 | OD2 | 3.003 |
| 3CSY | P_ARG_559 | NH2 | O_GLU_103 | OE1 | 3.054 |
| 3CSY | P_ARG_559 | NH2 | O_GLU_103 | OE2 | 2.808 |

Table 11: 3CSY-specific salt bridging network analysis. In this table, the residue naming scheme is **Chain ID.residue name.residue number**

| PDB ID | Residue A | Atom A | Residue B | Atom B | Distance (Å) |
|--------|-----------|--------|-----------|--------|--------------|
| 3VE0   | LLYS_64   | NZ     | LGLU_100  | OE1    | 3.434        |
| 3VE0   | LARG_85   | NH2    | LGLU_178  | OE1    | 3.938        |
| 3VE0   | LARG_85   | NH2    | LGLU_178  | OE2    | 2.598        |
| 3VE0   | LARG_130  | NH1    | LASP_163  | OD2    | 3.227        |
| 3VE0   | LHIS_154  | NE2    | LGLU_178  | OE1    | 2.497        |
| 3VE0   | LARG_164  | NH1    | LASP_163  | OD1    | 2.966        |
| 3VE0   | LARG_164  | NH1    | LASP_163  | OD2    | 2.614        |
| 3VE0   | LARG_164  | NH2    | LASP_163  | OD2    | 3.976        |
| 3VE0   | LARG_172  | NH1    | LGLU_112  | OE1    | 3.788        |
| 3VE0   | LARG_172  | NH1    | LGLU_112  | OE2    | 3.022        |
| 3VE0   | LARG_172  | NH1    | LGLU_120  | OE1    | 3.786        |
| 3VE0   | JHIS_516  | ND1    | JGLU_545  | OE1    | 3.938        |
| 3VE0   | JARG_559  | NH1    | LGLU_103  | OE1    | 3.852        |
| 3VE0   | JARG_559  | NH1    | LGLU_103  | OE2    | 3.848        |
| 3VE0   | JARG_559  | NH2    | LGLU_103  | OE1    | 2.444        |
| 3VE0   | JARG_559  | NH2    | LGLU_103  | OE2    | 2.766        |
| 3VE0   | JARG_595  | NH1    | JASP_591  | OD2    | 3.637        |
| 3VE0   | JARG_595  | NH2    | LASP_49   | OD2    | 3.842        |
| 3VE0   | JARG_596  | NH1    | LASP_55   | OD1    | 3.003        |
| 3VE0   | AARG_38   | NH1    | AASP_90   | OD2    | 2.796        |
| 3VE0   | AARG_38   | NH2    | AGLU_46   | OE1    | 2.957        |
| 3VE0   | AARG_38   | NH2    | AASP_90   | OD2    | 3.833        |
| 3VE0   | AARG_67   | NH1    | AASP_90   | OD1    | 2.638        |
| 3VE0   | AARG_67   | NH1    | AASP_90   | OD2    | 3.818        |
| 3VE0   | AARG_67   | NH2    | AASP_90   | OD1    | 3.519        |
| 3VE0   | AARG_67   | NH2    | AASP_90   | OD2    | 3.251        |
| 3VE0   | AARG_87   | NH2    | AGLU_89   | OE1    | 3.633        |
| 3VE0   | AARG_98   | NH2    | LGLU_44   | OE1    | 3.137        |
| 3VE0   | AARG_98   | NH2    | LGLU_44   | OE2    | 3.008        |
| 3VE0   | AARG_98   | NH2    | AASP_107  | OD1    | 3.467        |
| 3VE0   | ALYS_214  | NZ     | BGLU_123  | OE1    | 3.666        |
| 3VE0   | ALYS_214  | NZ     | BGLU_123  | OE2    | 2.624        |
| 3VE0   | AARG_219  | NH1    | AASP_220  | OD1    | 3.088        |
| 3VE0   | BARG_54   | NH2    | BASP_60   | OD1    | 3.562        |
| 3VE0   | BARG_61   | NH1    | BGLU_81   | OE1    | 3.512        |
| 3VE0   | BARG_61   | NH1    | BASP_82   | OD2    | 3.714        |
| 3VE0   | BARG_61   | NH2    | BGLU_81   | OE1    | 3.757        |
| 3VE0   | BARG_61   | NH2    | BGLU_81   | OE2    | 3.987        |
| 3VE0   | BLYS_103  | NZ     | BGLU_105  | OE1    | 3.337        |
| 3VE0   | BLYS_149  | NZ     | BGLU_195  | OE1    | 3.446        |
| 3VE0   | BLYS_149  | NZ     | BGLU_195  | OE2    | 2.550        |
| 3VE0   | BARG_155  | NH1    | BGLU_185  | OE1    | 2.325        |
| 3VE0   | BARG_155  | NH1    | BGLU_185  | OE2    | 3.974        |
| 3VE0   | BARG_155  | NH2    | BGLU_185  | OE1    | 3.539        |
| 3VE0   | BARG_155  | NH2    | BGLU_185  | OE2    | 3.905        |
| 3VE0   | BHIS_189  | ND1    | BASP_151  | OD1    | 3.017        |

Table 12: 3VE0-specific salt bridging network analysis. In this table, the residue naming scheme is **Chain ID\_residue name\_residue number**

| PDB ID | Residue A | Atom A | Residue B | Atom B | Distance (Å) |
|--------|-----------|--------|-----------|--------|--------------|
| 5F1B   | A_HIS_39  | NE2    | A_ASP_55  | OD1    | 3.999        |
| 5F1B   | A_ARG_64  | NH1    | A_GLU_100 | OE1    | 3.273        |
| 5F1B   | A_ARG_64  | NH1    | A_GLU_100 | OE2    | 3.876        |
| 5F1B   | A_ARG_85  | NH2    | A_GLU_178 | OE1    | 2.662        |
| 5F1B   | A_ARG_85  | NH2    | A_GLU_178 | OE2    | 3.814        |
| 5F1B   | A_ARG_130 | NH2    | A_ASP_163 | OD2    | 3.180        |
| 5F1B   | A_ARG_134 | NH1    | B_GLU_545 | OE2    | 3.659        |
| 5F1B   | A_HIS_154 | NE2    | A_GLU_178 | OE2    | 2.611        |
| 5F1B   | A_ARG_164 | NH2    | A_ASP_163 | OD1    | 3.605        |
| 5F1B   | A_ARG_164 | NH2    | A_ASP_163 | OD2    | 3.318        |
| 5F1B   | B_HIS_516 | NE2    | B_GLU_545 | OE1    | 3.961        |
| 5F1B   | B_ARG_559 | NH1    | A_GLU_103 | OE1    | 3.219        |
| 5F1B   | B_ARG_559 | NH1    | A_GLU_103 | OE2    | 3.449        |
| 5F1B   | B_ARG_559 | NH2    | A_GLU_103 | OE1    | 3.928        |
| 5F1B   | B_ARG_559 | NH2    | A_GLU_103 | OE2    | 2.697        |
| 5F1B   | B_LYS_588 | NZ     | A_ASP_47  | OD1    | 3.551        |
| 5F1B   | B_LYS_588 | NZ     | A_ASP_47  | OD2    | 3.521        |
| 5F1B   | C_ARG_32  | NH1    | C_GLU_34  | OE1    | 3.894        |
| 5F1B   | C_ARG_32  | NH1    | C_GLU_212 | OE2    | 3.039        |
| 5F1B   | C_ARG_32  | NH2    | C_GLU_212 | OE2    | 3.122        |
| 5F1B   | C_HIS_69  | NE2    | C_ASP_124 | OD1    | 2.595        |
| 5F1B   | C_HIS_69  | NE2    | C_ASP_124 | OD2    | 3.426        |
| 5F1B   | C_HIS_120 | NE2    | C_ASP_73  | OD1    | 3.129        |
| 5F1B   | C_HIS_125 | ND1    | C_ASP_159 | OD1    | 3.361        |
| 5F1B   | C_HIS_125 | ND1    | C_ASP_159 | OD2    | 2.705        |
| 5F1B   | C_HIS_138 | ND1    | C_ASP_136 | OD1    | 3.569        |
| 5F1B   | C_HIS_138 | ND1    | C_ASP_136 | OD2    | 2.668        |
| 5F1B   | C_HIS_140 | ND1    | C_ASP_153 | OD2    | 2.612        |
| 5F1B   | C_LYS_204 | NZ     | C_ASP_201 | OD2    | 2.921        |
| 5F1B   | C_ARG_207 | NH2    | C_ASP_86  | OD2    | 3.888        |
| 5F1B   | C_ARG_207 | NH2    | C_GLU_88  | OE1    | 2.527        |
| 5F1B   | C_ARG_207 | NH2    | C_GLU_88  | OE2    | 3.562        |

Table 13: 5F1B-specific salt bridging network analysis. In this table, the residue naming scheme is **Chain ID\_residue name\_residue number**

| PDB ID | Residue A | Atom A | Residue B | Atom B | Distance (Å) |
|--------|-----------|--------|-----------|--------|--------------|
| 5FHC   | J_ARG_559 | NH2    | K_GLU_103 | OE1    | 3.531        |
| 5FHC   | J_ARG_559 | NH2    | K_GLU_103 | OE2    | 3.399        |
| 5FHC   | K_ARG_64  | NH1    | K_GLU_100 | OE2    | 3.218        |
| 5FHC   | K_ARG_85  | NH2    | K_GLU_178 | OE1    | 2.651        |
| 5FHC   | K_ARG_85  | NH2    | K_GLU_178 | OE2    | 3.046        |
| 5FHC   | K_LYS_114 | NZ     | K_GLU_112 | OE1    | 3.499        |
| 5FHC   | K_LYS_114 | NZ     | K_GLU_120 | OE1    | 3.155        |
| 5FHC   | K_ARG_130 | NH1    | K_ASP_163 | OD2    | 2.715        |
| 5FHC   | K_ARG_134 | NH1    | J_GLU_545 | OE2    | 2.861        |
| 5FHC   | K_ARG_136 | NH1    | K_GLU_106 | OE2    | 3.301        |
| 5FHC   | K_HIS_154 | NE2    | K_GLU_178 | OE2    | 2.716        |
| 5FHC   | K_ARG_164 | NH2    | K_ASP_163 | OD1    | 3.639        |
| 5FHC   | K_ARG_164 | NH2    | K_ASP_163 | OD2    | 3.655        |
| 5FHC   | A_ARG_38  | NH1    | A_ASP_86  | OD1    | 2.921        |
| 5FHC   | A_ARG_38  | NH2    | A_GLU_46  | OE1    | 3.040        |
| 5FHC   | A_ARG_38  | NH2    | A_GLU_46  | OE2    | 3.982        |
| 5FHC   | A_ARG_38  | NH2    | A_ASP_86  | OD1    | 3.615        |
| 5FHC   | A_ARG_66  | NH1    | A_ASP_86  | OD1    | 3.508        |
| 5FHC   | A_ARG_66  | NH2    | A_ASP_86  | OD1    | 3.465        |
| 5FHC   | A_ARG_66  | NH2    | A_ASP_86  | OD2    | 2.756        |
| 5FHC   | A_ARG_94  | NH2    | A_ASP_101 | OD1    | 3.473        |
| 5FHC   | A_ARG_94  | NH2    | A_ASP_101 | OD2    | 3.241        |
| 5FHC   | A_LYS_143 | NZ     | B_GLU_124 | OE2    | 2.678        |
| 5FHC   | A_LYS_209 | NZ     | B_GLU_123 | OE1    | 2.702        |
| 5FHC   | A_LYS_209 | NZ     | B_GLU_123 | OE2    | 3.358        |
| 5FHC   | B_ARG_39  | NH2    | B_ASP_82  | OD1    | 3.944        |
| 5FHC   | B_ARG_61  | NH1    | B_ASP_82  | OD1    | 3.826        |
| 5FHC   | B_ARG_61  | NH1    | B_ASP_82  | OD2    | 2.658        |
| 5FHC   | B_ARG_61  | NH2    | B_ASP_82  | OD1    | 2.976        |
| 5FHC   | B_ARG_61  | NH2    | B_ASP_82  | OD2    | 3.232        |
| 5FHC   | B_LYS_103 | NZ     | B_ASP_85  | OD1    | 2.875        |
| 5FHC   | B_LYS_103 | NZ     | B_ASP_85  | OD2    | 3.594        |
| 5FHC   | B_LYS_149 | NZ     | B_GLU_203 | OE1    | 3.331        |
| 5FHC   | B_LYS_149 | NZ     | B_GLU_203 | OE2    | 3.999        |
| 5FHC   | L_ARG_61  | NH1    | L_GLU_81  | OE2    | 3.402        |
| 5FHC   | L_ARG_61  | NH1    | L_ASP_82  | OD1    | 2.944        |
| 5FHC   | L_ARG_61  | NH1    | L_ASP_82  | OD2    | 3.402        |
| 5FHC   | L_LYS_103 | NZ     | L_GLU_165 | OE2    | 3.468        |
| 5FHC   | L_LYS_149 | NZ     | L_GLU_195 | OE2    | 2.669        |
| 5FHC   | L_LYS_183 | NZ     | L_GLU_187 | OE2    | 2.948        |
| 5FHC   | L_HIS_189 | ND1    | L_ASP_151 | OD2    | 3.045        |
| 5FHC   | H_ARG_38  | NH1    | H_ASP_86  | OD1    | 2.743        |
| 5FHC   | H_ARG_38  | NH2    | H_GLU_46  | OE1    | 3.708        |
| 5FHC   | H_ARG_38  | NH2    | H_GLU_46  | OE2    | 3.194        |
| 5FHC   | H_ARG_38  | NH2    | H_ASP_86  | OD1    | 3.696        |
| 5FHC   | H_LYS_64  | NZ     | H_ASP_61  | OD1    | 3.953        |
| 5FHC   | H_ARG_66  | NH1    | H_ASP_86  | OD1    | 3.816        |
| 5FHC   | H_ARG_66  | NH1    | H_ASP_86  | OD2    | 2.875        |
| 5FHC   | H_ARG_66  | NH2    | H_ASP_86  | OD1    | 3.199        |
| 5FHC   | H_ARG_66  | NH2    | H_ASP_86  | OD2    | 3.692        |
| 5FHC   | H_LYS_75  | NZ     | H_GLU_72  | OE1    | 3.342        |
| 5FHC   | H_LYS_75  | NZ     | H_GLU_72  | OE2    | 3.694        |
| 5FHC   | H_ARG_94  | NH2    | H_ASP_101 | OD1    | 3.811        |
| 5FHC   | H_ARG_94  | NH2    | H_ASP_101 | OD2    | 3.111        |
| 5FHC   | H_LYS_143 | NZ     | H_ASP_144 | OD1    | 3.605        |
| 5FHC   | H_LYS_209 | NZ     | L_GLU_123 | OE1    | 3.238        |
| 5FHC   | H_LYS_209 | NZ     | L_GLU_123 | OE2    | 3.173        |

|      |           |    |           |     |       |
|------|-----------|----|-----------|-----|-------|
| 5FHC | H_LYS_210 | NZ | H_GLU_212 | OE1 | 3.977 |
| 5FHC | H_LYS_210 | NZ | H_GLU_212 | OE2 | 2.157 |

Table 14: 5FHC-specific salt bridging network analysis. In this table, the residue naming scheme is **Chain ID\_residue name\_residue number**

| PDB ID | Residue A | Atom A | Residue B  | Atom B | Distance (Å) |
|--------|-----------|--------|------------|--------|--------------|
| 5HJ3   | C_HIS_39  | NE2    | C_ASP_55   | OD1    | 3.393        |
| 5HJ3   | C_ARG_64  | NH1    | C_GLU_100  | OE2    | 3.438        |
| 5HJ3   | C_ARG_85  | NH1    | C_GLU_178  | OE1    | 3.195        |
| 5HJ3   | C_ARG_85  | NH2    | C_GLU_178  | OE1    | 2.394        |
| 5HJ3   | C_ARG_85  | NH2    | C_GLU_178  | OE2    | 2.812        |
| 5HJ3   | C_ARG_130 | NH2    | C_ASP_163  | OD2    | 3.561        |
| 5HJ3   | C_ARG_136 | NH2    | C_GLU_106  | OE2    | 3.743        |
| 5HJ3   | C_HIS_154 | NE2    | C_GLU_178  | OE2    | 2.920        |
| 5HJ3   | C_ARG_164 | NH2    | C_ASP_163  | OD1    | 3.508        |
| 5HJ3   | C_ARG_164 | NH2    | C_ASP_163  | OD2    | 2.651        |
| 5HJ3   | D_LYS_510 | NZ     | J_GLU_55   | OE1    | 3.743        |
| 5HJ3   | D_LYS_510 | NZ     | J_GLU_55   | OE2    | 3.493        |
| 5HJ3   | D_HIS_516 | NE2    | D_GLU_545  | OE1    | 2.622        |
| 5HJ3   | D_ARG_559 | NH2    | C_GLU_103  | OE1    | 2.496        |
| 5HJ3   | D_ARG_559 | NH2    | C_GLU_103  | OE2    | 2.573        |
| 5HJ3   | E_ARG_33  | NH1    | E_GLU_95   | OE1    | 3.015        |
| 5HJ3   | E_ARG_33  | NH1    | E_GLU_95   | OE2    | 3.055        |
| 5HJ3   | E_ARG_38  | NH1    | E_GLU_46   | OE1    | 3.787        |
| 5HJ3   | E_ARG_38  | NH1    | E_GLU_46   | OE2    | 2.695        |
| 5HJ3   | E_ARG_38  | NH2    | E_ASP_86   | OD1    | 2.624        |
| 5HJ3   | E_ARG_66  | NH1    | E_ASP_86   | OD1    | 3.916        |
| 5HJ3   | E_ARG_66  | NH1    | E_ASP_86   | OD2    | 2.722        |
| 5HJ3   | E_ARG_66  | NH2    | E_ASP_86   | OD1    | 3.391        |
| 5HJ3   | E_ARG_66  | NH2    | E_ASP_86   | OD2    | 3.561        |
| 5HJ3   | E_ARG_94  | NH2    | E_ASP_101  | OD1    | 3.948        |
| 5HJ3   | E_ARG_94  | NH2    | E_ASP_101  | OD2    | 2.561        |
| 5HJ3   | E_ARG_98  | NH1    | E_ASP_100F | OD1    | 3.696        |
| 5HJ3   | E_ARG_98  | NH1    | E_ASP_100F | OD2    | 2.997        |
| 5HJ3   | E_LYS_145 | NZ     | E_ASP_146  | OD1    | 2.852        |
| 5HJ3   | E_LYS_145 | NZ     | E_ASP_146  | OD2    | 2.810        |
| 5HJ3   | E_LYS_221 | NZ     | F_GLU_123  | OE2    | 3.658        |
| 5HJ3   | F_ARG_61  | NH2    | F_ASP_82   | OD1    | 3.037        |
| 5HJ3   | F_ARG_61  | NH2    | F_ASP_82   | OD2    | 3.919        |
| 5HJ3   | F_ARG_142 | NH2    | F_GLU_105  | OE1    | 2.744        |
| 5HJ3   | G_HIS_39  | NE2    | G_ASP_55   | OD1    | 3.217        |
| 5HJ3   | G_ARG_64  | NH1    | G_GLU_100  | OE2    | 3.233        |
| 5HJ3   | G_ARG_85  | NH1    | G_GLU_178  | OE1    | 3.267        |
| 5HJ3   | G_ARG_85  | NH2    | G_GLU_178  | OE1    | 2.478        |
| 5HJ3   | G_ARG_85  | NH2    | G_GLU_178  | OE2    | 2.771        |
| 5HJ3   | G_ARG_130 | NH2    | G_ASP_163  | OD2    | 3.392        |
| 5HJ3   | G_HIS_154 | NE2    | G_GLU_178  | OE2    | 2.990        |
| 5HJ3   | G_ARG_164 | NH2    | G_ASP_163  | OD1    | 3.521        |
| 5HJ3   | G_ARG_164 | NH2    | G_ASP_163  | OD2    | 2.692        |
| 5HJ3   | H_LYS_510 | NZ     | F_GLU_55   | OE2    | 3.815        |
| 5HJ3   | H_HIS_516 | NE2    | H_GLU_545  | OE1    | 2.614        |
| 5HJ3   | H_ARG_559 | NH2    | G_GLU_103  | OE1    | 2.521        |
| 5HJ3   | H_ARG_559 | NH2    | G_GLU_103  | OE2    | 2.719        |
| 5HJ3   | I_ARG_33  | NH1    | I_GLU_95   | OE1    | 2.790        |
| 5HJ3   | I_ARG_33  | NH1    | I_GLU_95   | OE2    | 3.012        |
| 5HJ3   | I_ARG_38  | NH1    | I_GLU_46   | OE1    | 3.771        |
| 5HJ3   | I_ARG_38  | NH1    | I_GLU_46   | OE2    | 2.572        |
| 5HJ3   | I_ARG_38  | NH2    | I_ASP_86   | OD1    | 2.596        |
| 5HJ3   | I_ARG_66  | NH1    | I_ASP_86   | OD2    | 2.716        |
| 5HJ3   | I_ARG_66  | NH2    | I_ASP_86   | OD1    | 3.241        |
| 5HJ3   | I_ARG_66  | NH2    | I_ASP_86   | OD2    | 3.167        |
| 5HJ3   | I_ARG_94  | NH2    | I_ASP_101  | OD1    | 3.512        |
| 5HJ3   | I_ARG_94  | NH2    | I_ASP_101  | OD2    | 2.751        |

|      |           |     |            |     |       |
|------|-----------|-----|------------|-----|-------|
| 5HJ3 | I_ARG_98  | NH1 | I_ASP_100F | OD1 | 3.834 |
| 5HJ3 | I_ARG_98  | NH1 | I_ASP_100F | OD2 | 3.081 |
| 5HJ3 | I_LYS_145 | NZ  | I_ASP_146  | OD1 | 2.788 |
| 5HJ3 | I_LYS_145 | NZ  | I_ASP_146  | OD2 | 2.739 |
| 5HJ3 | I_HIS_172 | NE2 | J_ASP_167  | OD2 | 3.705 |
| 5HJ3 | I_LYS_221 | NZ  | J_GLU_123  | OE1 | 3.253 |
| 5HJ3 | I_LYS_221 | NZ  | J_GLU_123  | OE2 | 2.800 |
| 5HJ3 | J_ARG_61  | NH2 | J_ASP_82   | OD1 | 2.701 |
| 5HJ3 | J_ARG_61  | NH2 | J_ASP_82   | OD2 | 3.572 |
| 5HJ3 | J_ARG_142 | NH2 | J_GLU_105  | OE1 | 2.682 |
| 5HJ3 | J_LYS_145 | NZ  | J_GLU_161  | OE2 | 3.678 |
| 5HJ3 | J_LYS_149 | NZ  | J_GLU_195  | OE1 | 2.603 |
| 5HJ3 | J_LYS_188 | NZ  | J_ASP_185  | OD2 | 3.757 |
| 5HJ3 | J_HIS_189 | ND1 | J_ASP_151  | OD1 | 3.934 |
| 5HJ3 | J_HIS_189 | ND1 | J_ASP_151  | OD2 | 2.742 |
| 5HJ3 | K_HIS_39  | NE2 | K_ASP_55   | OD1 | 3.802 |
| 5HJ3 | K_ARG_64  | NH1 | K_GLU_100  | OE2 | 3.581 |
| 5HJ3 | K_ARG_85  | NH1 | K_GLU_178  | OE1 | 3.179 |
| 5HJ3 | K_ARG_85  | NH2 | K_GLU_178  | OE1 | 2.573 |
| 5HJ3 | K_ARG_85  | NH2 | K_GLU_178  | OE2 | 2.682 |
| 5HJ3 | K_ARG_130 | NH2 | K_ASP_163  | OD2 | 3.783 |
| 5HJ3 | K_HIS_154 | NE2 | K_GLU_178  | OE2 | 3.079 |
| 5HJ3 | K_ARG_164 | NH2 | K_ASP_163  | OD1 | 3.726 |
| 5HJ3 | K_ARG_164 | NH2 | K_ASP_163  | OD2 | 2.770 |
| 5HJ3 | L_HIS_516 | NE2 | L_GLU_545  | OE1 | 2.683 |
| 5HJ3 | L_ARG_559 | NH2 | K_GLU_103  | OE1 | 2.680 |
| 5HJ3 | L_ARG_559 | NH2 | K_GLU_103  | OE2 | 2.484 |
| 5HJ3 | L_HIS_602 | ND1 | H_GLU_611  | OE1 | 3.679 |
| 5HJ3 | L_HIS_602 | NE2 | H_GLU_611  | OE1 | 3.945 |
| 5HJ3 | M_ARG_33  | NH1 | M_GLU_95   | OE1 | 2.923 |
| 5HJ3 | M_ARG_33  | NH1 | M_GLU_95   | OE2 | 2.923 |
| 5HJ3 | M_ARG_38  | NH1 | M_ASP_86   | OD1 | 3.188 |
| 5HJ3 | M_ARG_38  | NH2 | M_GLU_46   | OE1 | 3.623 |
| 5HJ3 | M_ARG_38  | NH2 | M_GLU_46   | OE2 | 2.841 |
| 5HJ3 | M_ARG_66  | NH1 | M_ASP_86   | OD1 | 3.810 |
| 5HJ3 | M_ARG_66  | NH1 | M_ASP_86   | OD2 | 2.388 |
| 5HJ3 | M_ARG_66  | NH2 | M_ASP_86   | OD1 | 2.897 |
| 5HJ3 | M_ARG_66  | NH2 | M_ASP_86   | OD2 | 2.965 |
| 5HJ3 | M_ARG_94  | NH2 | M_ASP_101  | OD1 | 3.853 |
| 5HJ3 | M_ARG_94  | NH2 | M_ASP_101  | OD2 | 2.629 |
| 5HJ3 | M_ARG_98  | NH1 | M_ASP_100F | OD1 | 3.630 |
| 5HJ3 | M_ARG_98  | NH1 | M_ASP_100F | OD2 | 2.969 |
| 5HJ3 | M_LYS_145 | NZ  | M_ASP_146  | OD1 | 3.782 |
| 5HJ3 | M_LYS_145 | NZ  | M_ASP_146  | OD2 | 3.675 |
| 5HJ3 | M_LYS_221 | NZ  | N_GLU_123  | OE1 | 3.397 |
| 5HJ3 | M_LYS_221 | NZ  | N_GLU_123  | OE2 | 3.011 |
| 5HJ3 | N_ARG_61  | NH2 | N_ASP_82   | OD1 | 3.282 |
| 5HJ3 | N_ARG_142 | NH2 | N_GLU_105  | OE1 | 2.640 |
| 5HJ3 | N_LYS_149 | NZ  | N_GLU_195  | OE1 | 2.786 |
| 5HJ3 | O_HIS_39  | NE2 | O_ASP_55   | OD1 | 3.321 |
| 5HJ3 | O_ARG_64  | NH1 | O_GLU_100  | OE2 | 3.235 |
| 5HJ3 | O_ARG_85  | NH1 | O_GLU_178  | OE1 | 3.339 |
| 5HJ3 | O_ARG_85  | NH2 | O_GLU_178  | OE1 | 2.457 |
| 5HJ3 | O_ARG_85  | NH2 | O_GLU_178  | OE2 | 2.948 |
| 5HJ3 | O_ARG_130 | NH2 | O_ASP_163  | OD2 | 3.468 |
| 5HJ3 | O_ARG_136 | NH2 | O_GLU_106  | OE2 | 3.955 |
| 5HJ3 | O_HIS_154 | NE2 | O_GLU_178  | OE2 | 2.840 |
| 5HJ3 | O_ARG_164 | NH2 | O_ASP_163  | OD1 | 3.663 |

|      |           |     |            |     |       |
|------|-----------|-----|------------|-----|-------|
| 5HJ3 | O_ARG_164 | NH2 | O_ASP_163  | OD2 | 2.780 |
| 5HJ3 | P_LYS_510 | NZ  | B_GLU_55   | OE1 | 3.843 |
| 5HJ3 | P_LYS_510 | NZ  | B_GLU_55   | OE2 | 3.553 |
| 5HJ3 | P_HIS_516 | NE2 | P_GLU_545  | OE1 | 2.882 |
| 5HJ3 | P_ARG_559 | NH2 | O_GLU_103  | OE1 | 2.547 |
| 5HJ3 | P_ARG_559 | NH2 | O_GLU_103  | OE2 | 2.625 |
| 5HJ3 | P_HIS_602 | NE2 | L_GLU_611  | OE1 | 3.277 |
| 5HJ3 | A_ARG_33  | NH1 | A_GLU_95   | OE1 | 2.660 |
| 5HJ3 | A_ARG_33  | NH1 | A_GLU_95   | OE2 | 3.038 |
| 5HJ3 | A_ARG_38  | NH1 | A_GLU_46   | OE1 | 3.725 |
| 5HJ3 | A_ARG_38  | NH1 | A_GLU_46   | OE2 | 2.619 |
| 5HJ3 | A_ARG_38  | NH2 | A_ASP_86   | OD1 | 2.771 |
| 5HJ3 | A_ARG_66  | NH1 | A_ASP_86   | OD1 | 3.710 |
| 5HJ3 | A_ARG_66  | NH1 | A_ASP_86   | OD2 | 2.544 |
| 5HJ3 | A_ARG_66  | NH2 | A_ASP_86   | OD1 | 3.134 |
| 5HJ3 | A_ARG_66  | NH2 | A_ASP_86   | OD2 | 3.423 |
| 5HJ3 | A_ARG_94  | NH2 | A_ASP_101  | OD1 | 3.718 |
| 5HJ3 | A_ARG_94  | NH2 | A_ASP_101  | OD2 | 2.938 |
| 5HJ3 | A_ARG_98  | NH1 | A_ASP_100F | OD1 | 3.722 |
| 5HJ3 | A_ARG_98  | NH1 | A_ASP_100F | OD2 | 2.936 |
| 5HJ3 | A_LYS_145 | NZ  | A_ASP_146  | OD1 | 2.925 |
| 5HJ3 | A_LYS_145 | NZ  | A_ASP_146  | OD2 | 2.830 |
| 5HJ3 | A_LYS_221 | NZ  | B_GLU_123  | OE1 | 3.583 |
| 5HJ3 | A_LYS_221 | NZ  | B_GLU_123  | OE2 | 3.404 |
| 5HJ3 | B_ARG_61  | NH2 | B_ASP_82   | OD1 | 3.154 |
| 5HJ3 | B_ARG_142 | NH2 | B_GLU_105  | OE1 | 3.025 |
| 5HJ3 | B_LYS_188 | NZ  | B_ASP_185  | OD2 | 3.880 |
| 5HJ3 | B_HIS_189 | ND1 | B_ASP_151  | OD2 | 2.951 |

Table 15: 5HJ3-specific salt bridging network analysis. In this table, the residue naming scheme is **Chain ID\_residue name\_residue number**

| PDB ID | Residue A  | Atom A | Residue B  | Atom B | Distance (Å) |
|--------|------------|--------|------------|--------|--------------|
| 5JNX   | A_LYS_38   | NZ     | A_ASP_37   | OD1    | 3.268        |
| 5JNX   | A_LYS_84   | NZ     | A_GLU_61   | OE1    | 2.923        |
| 5JNX   | A_LYS_84   | NZ     | A_GLU_61   | OE2    | 2.871        |
| 5JNX   | A_LYS_142  | NZ     | A_GLU_127  | OE1    | 2.943        |
| 5JNX   | A_LYS_171  | NZ     | A_GLU_164  | OE2    | 3.483        |
| 5JNX   | A_ARG_389  | NH1    | A_GLU_393  | OE2    | 3.992        |
| 5JNX   | A_LYS_392  | NZ     | A_ASP_396  | OD1    | 3.754        |
| 5JNX   | A_ARG_404  | NH1    | A_GLU_606  | OE1    | 3.028        |
| 5JNX   | A_ARG_404  | NH1    | A_GLU_606  | OE2    | 3.947        |
| 5JNX   | A_ARG_404  | NH2    | A_GLU_584  | OE1    | 3.703        |
| 5JNX   | A_HIS_441  | ND1    | A_ASP_496  | OD1    | 3.845        |
| 5JNX   | A_HIS_441  | NE2    | A_ASP_496  | OD1    | 2.206        |
| 5JNX   | A_HIS_441  | NE2    | A_ASP_496  | OD2    | 3.645        |
| 5JNX   | A_HIS_492  | NE2    | A_ASP_445  | OD1    | 3.105        |
| 5JNX   | A_HIS_510  | ND1    | A_ASP_508  | OD2    | 3.286        |
| 5JNX   | A_HIS_512  | ND1    | A_ASP_525  | OD2    | 2.862        |
| 5JNX   | A_ARG_579  | NH2    | A_ASP_466  | OD2    | 3.380        |
| 5JNX   | A_ARG_607  | NH1    | A_ASP_611  | OD2    | 3.972        |
| 5JNX   | A_ARG_1059 | NH2    | A_GLU_391  | OE1    | 2.950        |
| 5JNX   | A_ARG_1059 | NH2    | A_GLU_391  | OE2    | 3.638        |
| 5JNX   | A_ARG_1059 | NH2    | A_GLU_1089 | OE1    | 3.854        |
| 5JNX   | A_ARG_1059 | NH2    | A_GLU_1089 | OE2    | 3.604        |
| 5JNX   | A_HIS_1170 | ND1    | A_GLU_1166 | OE1    | 3.445        |
| 5JNX   | A_HIS_1170 | NE2    | A_GLU_688  | OE2    | 2.924        |
| 5JNX   | C_HIS_39   | NE2    | C_ASP_55   | OD1    | 3.998        |
| 5JNX   | C_ARG_64   | NH1    | C_GLU_100  | OE1    | 3.273        |
| 5JNX   | C_ARG_64   | NH1    | C_GLU_100  | OE2    | 3.875        |
| 5JNX   | C_ARG_85   | NH2    | C_GLU_178  | OE1    | 2.663        |
| 5JNX   | C_ARG_85   | NH2    | C_GLU_178  | OE2    | 3.814        |
| 5JNX   | C_ARG_130  | NH2    | C_ASP_163  | OD2    | 3.179        |
| 5JNX   | C_ARG_134  | NH1    | D_GLU_545  | OE2    | 3.659        |
| 5JNX   | C_HIS_154  | NE2    | C_GLU_178  | OE2    | 2.610        |
| 5JNX   | C_ARG_164  | NH2    | C_ASP_163  | OD1    | 3.605        |
| 5JNX   | C_ARG_164  | NH2    | C_ASP_163  | OD2    | 3.318        |
| 5JNX   | D_HIS_516  | NE2    | D_GLU_545  | OE1    | 3.961        |
| 5JNX   | D_ARG_559  | NH1    | C_GLU_103  | OE1    | 3.220        |
| 5JNX   | D_ARG_559  | NH1    | C_GLU_103  | OE2    | 3.450        |
| 5JNX   | D_ARG_559  | NH2    | C_GLU_103  | OE1    | 3.927        |
| 5JNX   | D_ARG_559  | NH2    | C_GLU_103  | OE2    | 2.697        |
| 5JNX   | D_LYS_588  | NZ     | C_ASP_47   | OD1    | 3.551        |
| 5JNX   | D_LYS_588  | NZ     | C_ASP_47   | OD2    | 3.521        |
| 5JNX   | E_HIS_39   | NE2    | E_ASP_55   | OD1    | 3.998        |
| 5JNX   | E_ARG_64   | NH1    | E_GLU_100  | OE1    | 3.272        |
| 5JNX   | E_ARG_64   | NH1    | E_GLU_100  | OE2    | 3.876        |
| 5JNX   | E_ARG_85   | NH2    | E_GLU_178  | OE1    | 2.403        |
| 5JNX   | E_ARG_85   | NH2    | E_GLU_178  | OE2    | 3.424        |
| 5JNX   | E_ARG_130  | NH2    | E_ASP_163  | OD2    | 3.179        |
| 5JNX   | E_ARG_134  | NH1    | F_GLU_545  | OE2    | 3.660        |
| 5JNX   | E_HIS_154  | NE2    | E_GLU_178  | OE2    | 2.610        |
| 5JNX   | E_LYS_155  | NZ     | A_ASP_502  | OD2    | 3.701        |
| 5JNX   | E_ARG_164  | NH2    | E_ASP_163  | OD1    | 3.605        |
| 5JNX   | E_ARG_164  | NH2    | E_ASP_163  | OD2    | 3.317        |
| 5JNX   | F_HIS_516  | NE2    | F_GLU_545  | OE1    | 3.961        |
| 5JNX   | F_ARG_559  | NH1    | E_GLU_103  | OE1    | 3.219        |
| 5JNX   | F_ARG_559  | NH1    | E_GLU_103  | OE2    | 3.448        |
| 5JNX   | F_ARG_559  | NH2    | E_GLU_103  | OE1    | 3.927        |
| 5JNX   | F_ARG_559  | NH2    | E_GLU_103  | OE2    | 2.697        |

|      |           |     |           |     |       |
|------|-----------|-----|-----------|-----|-------|
| 5JNX | F_LYS_588 | NZ  | E_ASP_47  | OD1 | 3.552 |
| 5JNX | F_LYS_588 | NZ  | E_ASP_47  | OD2 | 3.520 |
| 5JNX | G_HIS_39  | NE2 | G_ASP_55  | OD1 | 3.998 |
| 5JNX | G_ARG_64  | NH1 | G_GLU_100 | OE1 | 3.273 |
| 5JNX | G_ARG_64  | NH1 | G_GLU_100 | OE2 | 3.876 |
| 5JNX | G_ARG_85  | NH2 | G_GLU_178 | OE1 | 2.663 |
| 5JNX | G_ARG_85  | NH2 | G_GLU_178 | OE2 | 3.813 |
| 5JNX | G_ARG_130 | NH2 | G_ASP_163 | OD2 | 3.180 |
| 5JNX | G_ARG_134 | NH1 | H_GLU_545 | OE2 | 3.659 |
| 5JNX | G_HIS_154 | NE2 | G_GLU_178 | OE2 | 2.610 |
| 5JNX | G_ARG_164 | NH2 | G_ASP_163 | OD1 | 3.606 |
| 5JNX | G_ARG_164 | NH2 | G_ASP_163 | OD2 | 3.318 |
| 5JNX | H_HIS_516 | NE2 | H_GLU_545 | OE1 | 3.961 |
| 5JNX | H_ARG_559 | NH1 | G_GLU_103 | OE1 | 3.221 |
| 5JNX | H_ARG_559 | NH1 | G_GLU_103 | OE2 | 3.449 |
| 5JNX | H_ARG_559 | NH2 | G_GLU_103 | OE1 | 3.928 |
| 5JNX | H_ARG_559 | NH2 | G_GLU_103 | OE2 | 2.697 |
| 5JNX | H_LYS_588 | NZ  | G_ASP_47  | OD1 | 3.552 |
| 5JNX | H_LYS_588 | NZ  | G_ASP_47  | OD2 | 3.522 |

Table 16: 5JNX-specific salt bridging network analysis. In this table, the residue naming scheme is **Chain ID\_residue name\_residue number**

| PDB ID | Residue A | Atom A | Residue B | Atom B | Distance (Å) |
|--------|-----------|--------|-----------|--------|--------------|
| 5JQ3   | A_HIS_39  | NE2    | A_ASP_55  | OD1    | 2.911        |
| 5JQ3   | A_HIS_39  | NE2    | A_ASP_55  | OD2    | 3.472        |
| 5JQ3   | A_ARG_85  | NH1    | A_GLU_178 | OE1    | 3.536        |
| 5JQ3   | A_ARG_85  | NH1    | A_GLU_178 | OE2    | 2.746        |
| 5JQ3   | A_LYS_114 | NZ     | A_GLU_120 | OE1    | 3.849        |
| 5JQ3   | A_LYS_114 | NZ     | A_GLU_120 | OE2    | 3.453        |
| 5JQ3   | A_ARG_130 | NH2    | A_ASP_163 | OD1    | 3.021        |
| 5JQ3   | A_HIS_154 | NE2    | A_GLU_178 | OE1    | 2.776        |
| 5JQ3   | A_ARG_164 | NH1    | A_ASP_163 | OD1    | 3.056        |
| 5JQ3   | A_ARG_164 | NH1    | A_ASP_163 | OD2    | 3.532        |
| 5JQ3   | A_ARG_266 | NH2    | A_ASP_237 | OD2    | 3.203        |
| 5JQ3   | B_HIS_516 | NE2    | B_GLU_545 | OE1    | 2.971        |
| 5JQ3   | B_ARG_559 | NH1    | A_GLU_103 | OE1    | 2.754        |
| 5JQ3   | B_ARG_559 | NH1    | A_GLU_103 | OE2    | 3.830        |
| 5JQ3   | B_ARG_559 | NH2    | A_GLU_103 | OE1    | 3.362        |
| 5JQ3   | B_ARG_559 | NH2    | A_GLU_103 | OE2    | 2.945        |

Table 17: 5JQ3-specific salt bridging network analysis. In this table, the residue naming scheme is **Chain ID\_residue name\_residue number**

| PDB ID | Residue A | Atom A | Residue B | Atom B | Distance (Å) |
|--------|-----------|--------|-----------|--------|--------------|
| 5JQ7   | A_HIS_39  | NE2    | A_ASP_55  | OD1    | 3.302        |
| 5JQ7   | A_HIS_39  | NE2    | A_ASP_55  | OD2    | 2.805        |
| 5JQ7   | A_ARG_85  | NH1    | A_GLU_178 | OE1    | 3.344        |
| 5JQ7   | A_ARG_85  | NH1    | A_GLU_178 | OE2    | 2.714        |
| 5JQ7   | A_LYS_114 | NZ     | A_GLU_120 | OE2    | 3.552        |
| 5JQ7   | A_ARG_130 | NH2    | A_ASP_163 | OD1    | 2.926        |
| 5JQ7   | A_HIS_154 | NE2    | A_GLU_178 | OE1    | 2.770        |
| 5JQ7   | A_ARG_164 | NH1    | A_ASP_163 | OD1    | 2.933        |
| 5JQ7   | A_ARG_164 | NH1    | A_ASP_163 | OD2    | 3.613        |
| 5JQ7   | A_ARG_247 | NH1    | A_GLU_245 | OE1    | 3.700        |
| 5JQ7   | A_ARG_247 | NH1    | A_GLU_245 | OE2    | 3.859        |
| 5JQ7   | A_ARG_266 | NH2    | A_ASP_237 | OD2    | 3.168        |
| 5JQ7   | B_LYS_510 | NZ     | A_GLU_292 | OE1    | 3.131        |
| 5JQ7   | B_HIS_516 | NE2    | B_GLU_545 | OE1    | 2.658        |
| 5JQ7   | B_ARG_559 | NH1    | A_GLU_103 | OE1    | 2.800        |
| 5JQ7   | B_ARG_559 | NH1    | A_GLU_103 | OE2    | 3.720        |
| 5JQ7   | B_ARG_559 | NH2    | A_GLU_103 | OE1    | 3.375        |
| 5JQ7   | B_ARG_559 | NH2    | A_GLU_103 | OE2    | 2.748        |
| 5JQ7   | B_HIS_613 | NE2    | B_ASP_614 | OD1    | 3.865        |

Table 18: 5JQ7-specific salt bridging network analysis. In this table, the residue naming scheme is **Chain ID\_residue name\_residue number**

| PDB ID | Residue A | Atom A | Residue B | Atom B | Distance (Å) |
|--------|-----------|--------|-----------|--------|--------------|
| 5JQB   | A_ARG_85  | NH1    | A_GLU_178 | OE1    | 3.533        |
| 5JQB   | A_ARG_85  | NH1    | A_GLU_178 | OE2    | 2.805        |
| 5JQB   | A_LYS_114 | NZ     | A_GLU_120 | OE2    | 3.275        |
| 5JQB   | A_ARG_130 | NH2    | A_ASP_163 | OD1    | 3.034        |
| 5JQB   | A_HIS_154 | NE2    | A_GLU_178 | OE1    | 2.801        |
| 5JQB   | A_ARG_164 | NH1    | A_ASP_163 | OD1    | 2.868        |
| 5JQB   | A_ARG_164 | NH1    | A_ASP_163 | OD2    | 3.537        |
| 5JQB   | A_ARG_247 | NH1    | A_GLU_245 | OE1    | 3.146        |
| 5JQB   | A_ARG_266 | NH2    | A_ASP_237 | OD2    | 3.033        |
| 5JQB   | B_LYS_510 | NZ     | A_GLU_292 | OE1    | 2.746        |
| 5JQB   | B_LYS_510 | NZ     | A_GLU_292 | OE2    | 3.918        |
| 5JQB   | B_HIS_516 | NE2    | B_GLU_545 | OE1    | 2.749        |
| 5JQB   | B_ARG_559 | NH1    | A_GLU_103 | OE1    | 2.703        |
| 5JQB   | B_ARG_559 | NH1    | A_GLU_103 | OE2    | 3.788        |
| 5JQB   | B_ARG_559 | NH2    | A_GLU_103 | OE1    | 3.188        |
| 5JQB   | B_ARG_559 | NH2    | A_GLU_103 | OE2    | 2.857        |
| 5JQB   | B_LYS_588 | NZ     | A_ASP_47  | OD1    | 3.558        |
| 5JQB   | B_LYS_588 | NZ     | A_ASP_47  | OD2    | 3.148        |
| 5JQB   | B_LYS_617 | NZ     | B_ASP_614 | OD1    | 3.955        |

Table 19: 5JQB-specific salt bridging network analysis. In this table, the residue naming scheme is **Chain ID\_residue name\_residue number**

| PDB ID | Residue A | Atom A | Residue B | Atom B | Distance (Å) |
|--------|-----------|--------|-----------|--------|--------------|
| 5KEL   | A_ARG_85  | NH2    | A_GLU_178 | OE1    | 2.875        |
| 5KEL   | A_ARG_85  | NH2    | A_GLU_178 | OE2    | 3.676        |
| 5KEL   | A_LYS_114 | NZ     | A_GLU_120 | OE2    | 2.853        |
| 5KEL   | A_ARG_130 | NH1    | B_GLU_540 | OE2    | 3.053        |
| 5KEL   | A_ARG_130 | NH2    | A_ASP_163 | OD1    | 3.103        |
| 5KEL   | A_ARG_164 | NH2    | A_GLU_100 | OE1    | 3.728        |
| 5KEL   | A_ARG_164 | NH2    | A_GLU_100 | OE2    | 2.804        |
| 5KEL   | A_ARG_172 | NH1    | A_GLU_120 | OE1    | 2.760        |
| 5KEL   | A_ARG_172 | NH2    | A_GLU_112 | OE1    | 3.171        |
| 5KEL   | A_ARG_172 | NH2    | A_GLU_120 | OE1    | 2.755        |
| 5KEL   | A_ARG_219 | NH1    | A_GLU_235 | OE2    | 2.800        |
| 5KEL   | A_ARG_219 | NH2    | A_GLU_235 | OE2    | 3.004        |
| 5KEL   | A_ARG_247 | NH1    | A_GLU_245 | OE2    | 3.112        |
| 5KEL   | A_ARG_247 | NH2    | A_GLU_245 | OE2    | 3.134        |
| 5KEL   | A_LYS_272 | NZ     | C_ASP_54  | OD2    | 3.464        |
| 5KEL   | A_LYS_272 | NZ     | C_ASP_56  | OD2    | 2.595        |
| 5KEL   | A_ARG_299 | NH2    | A_GLU_304 | OE1    | 3.032        |
| 5KEL   | A_ARG_299 | NH2    | A_GLU_304 | OE2    | 3.954        |
| 5KEL   | A_ARG_302 | NH1    | A_GLU_304 | OE2    | 3.084        |
| 5KEL   | A_ARG_302 | NH2    | A_GLU_258 | OE2    | 2.817        |
| 5KEL   | B_HIS_516 | NE2    | B_GLU_545 | OE1    | 2.855        |
| 5KEL   | B_ARG_559 | NH1    | A_GLU_103 | OE2    | 3.831        |
| 5KEL   | B_ARG_559 | NH2    | A_GLU_103 | OE1    | 3.279        |
| 5KEL   | B_ARG_559 | NH2    | A_GLU_103 | OE2    | 3.801        |
| 5KEL   | B_ARG_596 | NH2    | B_ASP_607 | OD1    | 3.037        |
| 5KEL   | H_ARG_38  | NH1    | H_ASP_86  | OD1    | 3.058        |
| 5KEL   | H_ARG_38  | NH2    | H_GLU_46  | OE2    | 2.878        |
| 5KEL   | H_ARG_52  | NH1    | H_GLU_50  | OE2    | 3.140        |
| 5KEL   | H_LYS_64  | NZ     | H_GLU_61  | OE1    | 3.895        |
| 5KEL   | H_LYS_64  | NZ     | H_GLU_61  | OE2    | 2.690        |
| 5KEL   | H_ARG_66  | NH1    | H_ASP_86  | OD1    | 3.110        |
| 5KEL   | H_ARG_66  | NH1    | H_ASP_86  | OD2    | 3.688        |
| 5KEL   | H_ARG_66  | NH2    | H_ASP_86  | OD1    | 3.615        |
| 5KEL   | H_ARG_66  | NH2    | H_ASP_86  | OD2    | 2.807        |
| 5KEL   | H_ARG_71  | NH2    | H_ASP_73  | OD1    | 2.936        |
| 5KEL   | H_ARG_71  | NH2    | H_ASP_73  | OD2    | 3.775        |
| 5KEL   | H_ARG_83  | NH1    | H_GLU_85  | OE1    | 3.189        |
| 5KEL   | H_ARG_83  | NH2    | H_GLU_85  | OE1    | 3.016        |
| 5KEL   | L_ARG_61  | NH1    | L_ASP_82  | OD2    | 2.735        |
| 5KEL   | L_ARG_61  | NH2    | L_GLU_81  | OE2    | 3.025        |
| 5KEL   | L_ARG_61  | NH2    | L_ASP_82  | OD1    | 3.676        |
| 5KEL   | L_ARG_61  | NH2    | L_ASP_82  | OD2    | 2.981        |
| 5KEL   | L_LYS_107 | NZ     | L_GLU_17  | OE1    | 2.902        |
| 5KEL   | L_LYS_107 | NZ     | L_GLU_17  | OE2    | 3.185        |
| 5KEL   | C_LYS_3   | NZ     | C_ASP_1   | OD1    | 2.754        |
| 5KEL   | C_LYS_3   | NZ     | C_ASP_1   | OD2    | 3.442        |
| 5KEL   | C_ARG_38  | NH1    | C_ASP_86  | OD1    | 3.057        |
| 5KEL   | C_ARG_38  | NH2    | C_GLU_46  | OE1    | 3.665        |
| 5KEL   | C_ARG_38  | NH2    | C_GLU_46  | OE2    | 3.228        |
| 5KEL   | C_ARG_38  | NH2    | C_ASP_86  | OD1    | 3.984        |
| 5KEL   | C_LYS_71  | NZ     | C_ASP_55  | OD1    | 2.808        |
| 5KEL   | C_ARG_75  | NH2    | C_ASP_72  | OD2    | 2.896        |
| 5KEL   | D_LYS_24  | NZ     | D_ASP_70  | OD1    | 2.745        |
| 5KEL   | D_LYS_24  | NZ     | D_ASP_70  | OD2    | 3.810        |
| 5KEL   | D_ARG_61  | NH1    | D_GLU_81  | OE2    | 3.962        |
| 5KEL   | D_ARG_61  | NH2    | D_GLU_81  | OE2    | 2.780        |
| 5KEL   | D_ARG_61  | NH2    | D_ASP_82  | OD1    | 2.856        |

|      |           |     |           |     |       |
|------|-----------|-----|-----------|-----|-------|
| 5KEL | D_ARG_61  | NH2 | D_ASP_82  | OD2 | 3.346 |
| 5KEL | D_ARG_107 | NH1 | D_GLU_105 | OE2 | 2.791 |
| 5KEL | E_ARG_85  | NH2 | E_GLU_178 | OE1 | 2.875 |
| 5KEL | E_ARG_85  | NH2 | E_GLU_178 | OE2 | 3.677 |
| 5KEL | E_LYS_114 | NZ  | E_GLU_120 | OE2 | 2.853 |
| 5KEL | E_ARG_130 | NH1 | G_GLU_540 | OE2 | 3.054 |
| 5KEL | E_ARG_130 | NH2 | E_ASP_163 | OD1 | 3.104 |
| 5KEL | E_ARG_164 | NH2 | E_GLU_100 | OE1 | 3.728 |
| 5KEL | E_ARG_164 | NH2 | E_GLU_100 | OE2 | 2.804 |
| 5KEL | E_ARG_172 | NH1 | E_GLU_120 | OE1 | 2.760 |
| 5KEL | E_ARG_172 | NH2 | E_GLU_112 | OE1 | 3.171 |
| 5KEL | E_ARG_172 | NH2 | E_GLU_120 | OE1 | 2.755 |
| 5KEL | E_ARG_219 | NH1 | E_GLU_235 | OE2 | 2.800 |
| 5KEL | E_ARG_219 | NH2 | E_GLU_235 | OE2 | 3.003 |
| 5KEL | E_ARG_247 | NH1 | E_GLU_245 | OE2 | 3.112 |
| 5KEL | E_ARG_247 | NH2 | E_GLU_245 | OE2 | 3.134 |
| 5KEL | E_LYS_272 | NZ  | J_ASP_54  | OD2 | 3.464 |
| 5KEL | E_LYS_272 | NZ  | J_ASP_56  | OD2 | 2.596 |
| 5KEL | E_ARG_299 | NH2 | E_GLU_304 | OE1 | 3.031 |
| 5KEL | E_ARG_299 | NH2 | E_GLU_304 | OE2 | 3.954 |
| 5KEL | E_ARG_302 | NH1 | E_GLU_304 | OE2 | 3.085 |
| 5KEL | E_ARG_302 | NH2 | E_GLU_258 | OE2 | 2.816 |
| 5KEL | G_HIS_516 | NE2 | G_GLU_545 | OE1 | 2.855 |
| 5KEL | G_ARG_559 | NH1 | E_GLU_103 | OE2 | 3.832 |
| 5KEL | G_ARG_559 | NH2 | E_GLU_103 | OE1 | 3.279 |
| 5KEL | G_ARG_559 | NH2 | E_GLU_103 | OE2 | 3.802 |
| 5KEL | G_ARG_596 | NH2 | G_ASP_607 | OD1 | 3.038 |
| 5KEL | P_ARG_38  | NH1 | P_ASP_86  | OD1 | 3.058 |
| 5KEL | P_ARG_38  | NH2 | P_GLU_46  | OE2 | 2.878 |
| 5KEL | P_ARG_52  | NH1 | P_GLU_50  | OE2 | 3.140 |
| 5KEL | P_LYS_64  | NZ  | P_GLU_61  | OE1 | 3.894 |
| 5KEL | P_LYS_64  | NZ  | P_GLU_61  | OE2 | 2.690 |
| 5KEL | P_ARG_66  | NH1 | P_ASP_86  | OD1 | 3.110 |
| 5KEL | P_ARG_66  | NH1 | P_ASP_86  | OD2 | 3.688 |
| 5KEL | P_ARG_66  | NH2 | P_ASP_86  | OD1 | 3.615 |
| 5KEL | P_ARG_66  | NH2 | P_ASP_86  | OD2 | 2.807 |
| 5KEL | P_ARG_71  | NH2 | P_ASP_73  | OD1 | 2.936 |
| 5KEL | P_ARG_71  | NH2 | P_ASP_73  | OD2 | 3.775 |
| 5KEL | P_ARG_83  | NH1 | P_GLU_85  | OE1 | 3.188 |
| 5KEL | P_ARG_83  | NH2 | P_GLU_85  | OE1 | 3.017 |
| 5KEL | T_ARG_61  | NH1 | T_ASP_82  | OD2 | 2.735 |
| 5KEL | T_ARG_61  | NH2 | T_GLU_81  | OE2 | 3.025 |
| 5KEL | T_ARG_61  | NH2 | T_ASP_82  | OD1 | 3.676 |
| 5KEL | T_ARG_61  | NH2 | T_ASP_82  | OD2 | 2.981 |
| 5KEL | T_LYS_107 | NZ  | T_GLU_17  | OE1 | 2.903 |
| 5KEL | T_LYS_107 | NZ  | T_GLU_17  | OE2 | 3.186 |
| 5KEL | J_LYS_3   | NZ  | J_ASP_1   | OD1 | 2.754 |
| 5KEL | J_LYS_3   | NZ  | J_ASP_1   | OD2 | 3.442 |
| 5KEL | J_ARG_38  | NH1 | J_ASP_86  | OD1 | 3.057 |
| 5KEL | J_ARG_38  | NH2 | J_GLU_46  | OE1 | 3.665 |
| 5KEL | J_ARG_38  | NH2 | J_GLU_46  | OE2 | 3.228 |
| 5KEL | J_ARG_38  | NH2 | J_ASP_86  | OD1 | 3.983 |
| 5KEL | J_LYS_71  | NZ  | J_ASP_55  | OD1 | 2.808 |
| 5KEL | J_ARG_75  | NH2 | J_ASP_72  | OD2 | 2.896 |
| 5KEL | N_LYS_24  | NZ  | N_ASP_70  | OD1 | 2.744 |
| 5KEL | N_LYS_24  | NZ  | N_ASP_70  | OD2 | 3.810 |
| 5KEL | N_ARG_61  | NH1 | N_GLU_81  | OE2 | 3.962 |
| 5KEL | N_ARG_61  | NH2 | N_GLU_81  | OE2 | 2.781 |

|      |           |     |           |     |       |
|------|-----------|-----|-----------|-----|-------|
| 5KEL | N_ARG.61  | NH2 | N_ASP.82  | OD1 | 2.855 |
| 5KEL | N_ARG.61  | NH2 | N_ASP.82  | OD2 | 3.346 |
| 5KEL | N_ARG.107 | NH1 | N_GLU.105 | OE2 | 2.791 |
| 5KEL | F_ARG.85  | NH2 | F_GLU.178 | OE1 | 2.875 |
| 5KEL | F_ARG.85  | NH2 | F_GLU.178 | OE2 | 3.677 |
| 5KEL | F_LYS.114 | NZ  | F_GLU.120 | OE2 | 2.853 |
| 5KEL | F_ARG.130 | NH1 | L_GLU.540 | OE2 | 3.053 |
| 5KEL | F_ARG.130 | NH2 | F_ASP.163 | OD1 | 3.103 |
| 5KEL | F_ARG.164 | NH2 | F_GLU.100 | OE1 | 3.728 |
| 5KEL | F_ARG.164 | NH2 | F_GLU.100 | OE2 | 2.804 |
| 5KEL | F_ARG.172 | NH1 | F_GLU.120 | OE1 | 2.760 |
| 5KEL | F_ARG.172 | NH2 | F_GLU.112 | OE1 | 3.170 |
| 5KEL | F_ARG.172 | NH2 | F_GLU.120 | OE1 | 2.755 |
| 5KEL | F_ARG.219 | NH1 | F_GLU.235 | OE2 | 2.799 |
| 5KEL | F_ARG.219 | NH2 | F_GLU.235 | OE2 | 3.003 |
| 5KEL | F_ARG.247 | NH1 | F_GLU.245 | OE2 | 3.112 |
| 5KEL | F_ARG.247 | NH2 | F_GLU.245 | OE2 | 3.134 |
| 5KEL | F_LYS.272 | NZ  | M_ASP.54  | OD2 | 3.463 |
| 5KEL | F_LYS.272 | NZ  | M_ASP.56  | OD2 | 2.596 |
| 5KEL | F_ARG.299 | NH2 | F_GLU.304 | OE1 | 3.032 |
| 5KEL | F_ARG.299 | NH2 | F_GLU.304 | OE2 | 3.954 |
| 5KEL | F_ARG.302 | NH1 | F_GLU.304 | OE2 | 3.084 |
| 5KEL | F_ARG.302 | NH2 | F_GLU.258 | OE2 | 2.816 |
| 5KEL | L_HIS.516 | NE2 | L_GLU.545 | OE1 | 2.855 |
| 5KEL | L_ARG.559 | NH1 | F_GLU.103 | OE2 | 3.831 |
| 5KEL | L_ARG.559 | NH2 | F_GLU.103 | OE1 | 3.279 |
| 5KEL | L_ARG.559 | NH2 | F_GLU.103 | OE2 | 3.801 |
| 5KEL | L_ARG.596 | NH2 | L_ASP.607 | OD1 | 3.037 |
| 5KEL | Q_ARG.38  | NH1 | Q_ASP.86  | OD1 | 3.058 |
| 5KEL | Q_ARG.38  | NH2 | Q_GLU.46  | OE2 | 2.878 |
| 5KEL | Q_ARG.52  | NH1 | Q_GLU.50  | OE2 | 3.140 |
| 5KEL | Q_LYS.64  | NZ  | Q_GLU.61  | OE1 | 3.895 |
| 5KEL | Q_LYS.64  | NZ  | Q_GLU.61  | OE2 | 2.690 |
| 5KEL | Q_ARG.66  | NH1 | Q_ASP.86  | OD1 | 3.110 |
| 5KEL | Q_ARG.66  | NH1 | Q_ASP.86  | OD2 | 3.688 |
| 5KEL | Q_ARG.66  | NH2 | Q_ASP.86  | OD1 | 3.615 |
| 5KEL | Q_ARG.66  | NH2 | Q_ASP.86  | OD2 | 2.807 |
| 5KEL | Q_ARG.71  | NH2 | Q_ASP.73  | OD1 | 2.936 |
| 5KEL | Q_ARG.71  | NH2 | Q_ASP.73  | OD2 | 3.774 |
| 5KEL | Q_ARG.83  | NH1 | Q_GLU.85  | OE1 | 3.189 |
| 5KEL | Q_ARG.83  | NH2 | Q_GLU.85  | OE1 | 3.016 |
| 5KEL | U_ARG.61  | NH1 | U_ASP.82  | OD2 | 2.734 |
| 5KEL | U_ARG.61  | NH2 | U_GLU.81  | OE2 | 3.025 |
| 5KEL | U_ARG.61  | NH2 | U_ASP.82  | OD1 | 3.676 |
| 5KEL | U_ARG.61  | NH2 | U_ASP.82  | OD2 | 2.981 |
| 5KEL | U_LYS.107 | NZ  | U_GLU.17  | OE1 | 2.903 |
| 5KEL | U_LYS.107 | NZ  | U_GLU.17  | OE2 | 3.186 |
| 5KEL | M_LYS.3   | NZ  | M_ASP.1   | OD1 | 2.754 |
| 5KEL | M_LYS.3   | NZ  | M_ASP.1   | OD2 | 3.442 |
| 5KEL | M_ARG.38  | NH1 | M_ASP.86  | OD1 | 3.057 |
| 5KEL | M_ARG.38  | NH2 | M_GLU.46  | OE1 | 3.665 |
| 5KEL | M_ARG.38  | NH2 | M_GLU.46  | OE2 | 3.228 |
| 5KEL | M_ARG.38  | NH2 | M_ASP.86  | OD1 | 3.984 |
| 5KEL | M_LYS.71  | NZ  | M_ASP.55  | OD1 | 2.808 |
| 5KEL | M_ARG.75  | NH2 | M_ASP.72  | OD2 | 2.896 |
| 5KEL | O_LYS.24  | NZ  | O_ASP.70  | OD1 | 2.745 |
| 5KEL | O_LYS.24  | NZ  | O_ASP.70  | OD2 | 3.811 |
| 5KEL | O_ARG.61  | NH1 | O_GLU.81  | OE2 | 3.961 |

|      |           |     |           |     |       |
|------|-----------|-----|-----------|-----|-------|
| 5KEL | O_ARG_61  | NH2 | O_GLU_81  | OE2 | 2.780 |
| 5KEL | O_ARG_61  | NH2 | O_ASP_82  | OD1 | 2.855 |
| 5KEL | O_ARG_61  | NH2 | O_ASP_82  | OD2 | 3.346 |
| 5KEL | O_ARG_107 | NH1 | O_GLU_105 | OE2 | 2.791 |

Table 20: 5KEL-specific salt bridging network analysis. In this table, the residue naming scheme is **Chain ID\_residue name\_residue number**

| PDB ID | Residue A | Atom A | Residue B | Atom B | Distance (Å) |
|--------|-----------|--------|-----------|--------|--------------|
| 5KEM   | C_ARG_24  | NH1    | C_GLU_70  | OE1    | 3.169        |
| 5KEM   | C_ARG_24  | NH2    | C_GLU_70  | OE1    | 2.965        |
| 5KEM   | C_ARG_61  | NH1    | C_ASP_82  | OD1    | 3.729        |
| 5KEM   | C_ARG_61  | NH1    | C_ASP_82  | OD2    | 2.658        |
| 5KEM   | C_ARG_61  | NH2    | C_GLU_81  | OE2    | 3.360        |
| 5KEM   | C_ARG_61  | NH2    | C_ASP_82  | OD1    | 3.084        |
| 5KEM   | C_ARG_61  | NH2    | C_ASP_82  | OD2    | 3.287        |
| 5KEM   | C_ARG_103 | NH1    | C_GLU_105 | OE1    | 2.773        |
| 5KEM   | C_ARG_103 | NH2    | C_GLU_105 | OE1    | 2.948        |
| 5KEM   | B_LYS_12  | NZ     | B_GLU_10  | OE1    | 3.650        |
| 5KEM   | B_LYS_12  | NZ     | B_GLU_10  | OE2    | 2.758        |
| 5KEM   | B_LYS_19  | NZ     | B_ASP_81  | OD2    | 2.772        |
| 5KEM   | B_ARG_38  | NH1    | B_GLU_46  | OE1    | 2.905        |
| 5KEM   | B_ARG_38  | NH1    | B_ASP_86  | OD1    | 3.520        |
| 5KEM   | B_ARG_38  | NH1    | B_ASP_86  | OD2    | 3.245        |
| 5KEM   | B_ARG_38  | NH2    | B_ASP_86  | OD1    | 2.958        |
| 5KEM   | B_ARG_38  | NH2    | B_ASP_86  | OD2    | 3.504        |
| 5KEM   | B_LYS_53  | NZ     | B_ASP_31  | OD1    | 2.921        |
| 5KEM   | B_ARG_64  | NH1    | B_GLU_46  | OE1    | 3.725        |
| 5KEM   | B_ARG_64  | NH1    | B_GLU_46  | OE2    | 2.926        |
| 5KEM   | B_ARG_64  | NH2    | B_GLU_46  | OE1    | 3.105        |
| 5KEM   | B_ARG_64  | NH2    | B_GLU_46  | OE2    | 3.585        |
| 5KEM   | B_LYS_83  | NZ     | B_ASP_85  | OD1    | 3.656        |
| 5KEM   | B_LYS_83  | NZ     | B_ASP_85  | OD2    | 2.787        |
| 5KEM   | D_LYS_3   | NZ     | D_ASP_1   | OD2    | 2.842        |
| 5KEM   | D_LYS_43  | NZ     | D_GLU_46  | OE2    | 2.896        |
| 5KEM   | D_LYS_57  | NZ     | D_ASP_55  | OD1    | 3.976        |
| 5KEM   | D_LYS_57  | NZ     | D_ASP_55  | OD2    | 2.638        |
| 5KEM   | D_LYS_71  | NZ     | D_ASP_56  | OD1    | 2.855        |
| 5KEM   | D_LYS_71  | NZ     | D_ASP_56  | OD2    | 3.526        |
| 5KEM   | D_ARG_75  | NH2    | D_ASP_72  | OD2    | 2.852        |
| 5KEM   | D_ARG_94  | NH1    | D_ASP_96  | OD1    | 3.169        |
| 5KEM   | D_ARG_94  | NH2    | D_ASP_96  | OD1    | 3.069        |
| 5KEM   | E_LYS_24  | NZ     | E_ASP_70  | OD1    | 3.824        |
| 5KEM   | E_ARG_54  | NH1    | E_ASP_60  | OD1    | 2.684        |
| 5KEM   | E_ARG_54  | NH2    | E_ASP_60  | OD1    | 2.959        |
| 5KEM   | E_ARG_61  | NH1    | E_ASP_82  | OD2    | 3.854        |
| 5KEM   | E_ARG_107 | NH1    | E_GLU_105 | OE1    | 2.926        |
| 5KEM   | E_ARG_107 | NH1    | E_GLU_105 | OE2    | 3.400        |
| 5KEM   | A_ARG_85  | NH1    | A_GLU_178 | OE1    | 2.986        |
| 5KEM   | A_ARG_85  | NH1    | A_GLU_178 | OE2    | 3.588        |
| 5KEM   | A_ARG_85  | NH2    | A_GLU_178 | OE1    | 3.598        |
| 5KEM   | A_ARG_85  | NH2    | A_GLU_178 | OE2    | 2.771        |
| 5KEM   | A_LYS_114 | NZ     | A_GLU_112 | OE2    | 2.902        |
| 5KEM   | A_LYS_114 | NZ     | A_GLU_120 | OE1    | 2.734        |
| 5KEM   | A_ARG_172 | NH2    | A_GLU_112 | OE1    | 2.757        |
| 5KEM   | A_ARG_219 | NH1    | A_GLU_235 | OE1    | 3.033        |
| 5KEM   | A_ARG_247 | NH1    | A_ASP_282 | OD2    | 3.763        |
| 5KEM   | A_ARG_247 | NH2    | A_ASP_282 | OD2    | 3.187        |
| 5KEM   | A_LYS_272 | NZ     | D_ASP_54  | OD1    | 2.876        |
| 5KEM   | A_LYS_272 | NZ     | D_ASP_54  | OD2    | 3.185        |
| 5KEM   | A_LYS_272 | NZ     | A_GLU_235 | OE2    | 2.870        |
| 5KEM   | H_ARG_24  | NH1    | H_GLU_70  | OE1    | 3.169        |
| 5KEM   | H_ARG_24  | NH2    | H_GLU_70  | OE1    | 2.966        |
| 5KEM   | H_ARG_61  | NH1    | H_ASP_82  | OD1    | 3.730        |
| 5KEM   | H_ARG_61  | NH1    | H_ASP_82  | OD2    | 2.658        |
| 5KEM   | H_ARG_61  | NH2    | H_GLU_81  | OE2    | 3.360        |

|      |           |     |           |     |       |
|------|-----------|-----|-----------|-----|-------|
| 5KEM | H_ARG_61  | NH2 | H_ASP_82  | OD1 | 3.084 |
| 5KEM | H_ARG_61  | NH2 | H_ASP_82  | OD2 | 3.287 |
| 5KEM | H_ARG_103 | NH1 | H_GLU_105 | OE1 | 2.774 |
| 5KEM | H_ARG_103 | NH2 | H_GLU_105 | OE1 | 2.948 |
| 5KEM | G_LYS_12  | NZ  | G_GLU_10  | OE1 | 3.649 |
| 5KEM | G_LYS_12  | NZ  | G_GLU_10  | OE2 | 2.758 |
| 5KEM | G_LYS_19  | NZ  | G_ASP_81  | OD2 | 2.772 |
| 5KEM | G_ARG_38  | NH1 | G_GLU_46  | OE1 | 2.905 |
| 5KEM | G_ARG_38  | NH1 | G_ASP_86  | OD1 | 3.521 |
| 5KEM | G_ARG_38  | NH1 | G_ASP_86  | OD2 | 3.246 |
| 5KEM | G_ARG_38  | NH2 | G_ASP_86  | OD1 | 2.960 |
| 5KEM | G_ARG_38  | NH2 | G_ASP_86  | OD2 | 3.505 |
| 5KEM | G_LYS_53  | NZ  | G_ASP_31  | OD1 | 2.921 |
| 5KEM | G_ARG_64  | NH1 | G_GLU_46  | OE1 | 3.725 |
| 5KEM | G_ARG_64  | NH1 | G_GLU_46  | OE2 | 2.925 |
| 5KEM | G_ARG_64  | NH2 | G_GLU_46  | OE1 | 3.106 |
| 5KEM | G_ARG_64  | NH2 | G_GLU_46  | OE2 | 3.585 |
| 5KEM | G_LYS_83  | NZ  | G_ASP_85  | OD1 | 3.656 |
| 5KEM | G_LYS_83  | NZ  | G_ASP_85  | OD2 | 2.788 |
| 5KEM | L_LYS_3   | NZ  | L_ASP_1   | OD2 | 2.842 |
| 5KEM | L_LYS_43  | NZ  | L_GLU_46  | OE2 | 2.897 |
| 5KEM | L_LYS_57  | NZ  | L_ASP_55  | OD1 | 3.976 |
| 5KEM | L_LYS_57  | NZ  | L_ASP_55  | OD2 | 2.638 |
| 5KEM | L_LYS_71  | NZ  | L_ASP_56  | OD1 | 2.856 |
| 5KEM | L_LYS_71  | NZ  | L_ASP_56  | OD2 | 3.527 |
| 5KEM | L_ARG_75  | NH2 | L_ASP_72  | OD2 | 2.852 |
| 5KEM | L_ARG_94  | NH1 | L_ASP_96  | OD1 | 3.167 |
| 5KEM | L_ARG_94  | NH2 | L_ASP_96  | OD1 | 3.069 |
| 5KEM | J_LYS_24  | NZ  | J_ASP_70  | OD1 | 3.825 |
| 5KEM | J_ARG_54  | NH1 | J_ASP_60  | OD1 | 2.683 |
| 5KEM | J_ARG_54  | NH2 | J_ASP_60  | OD1 | 2.960 |
| 5KEM | J_ARG_61  | NH1 | J_ASP_82  | OD2 | 3.854 |
| 5KEM | J_ARG_107 | NH1 | J_GLU_105 | OE1 | 2.925 |
| 5KEM | J_ARG_107 | NH1 | J_GLU_105 | OE2 | 3.399 |
| 5KEM | F_ARG_85  | NH1 | F_GLU_178 | OE1 | 2.987 |
| 5KEM | F_ARG_85  | NH1 | F_GLU_178 | OE2 | 3.589 |
| 5KEM | F_ARG_85  | NH2 | F_GLU_178 | OE1 | 3.598 |
| 5KEM | F_ARG_85  | NH2 | F_GLU_178 | OE2 | 2.771 |
| 5KEM | F_LYS_114 | NZ  | F_GLU_112 | OE2 | 2.902 |
| 5KEM | F_LYS_114 | NZ  | F_GLU_120 | OE1 | 2.734 |
| 5KEM | F_ARG_172 | NH2 | F_GLU_112 | OE1 | 2.756 |
| 5KEM | F_ARG_219 | NH1 | F_GLU_235 | OE1 | 3.032 |
| 5KEM | F_ARG_247 | NH1 | F_ASP_282 | OD2 | 3.762 |
| 5KEM | F_ARG_247 | NH2 | F_ASP_282 | OD2 | 3.186 |
| 5KEM | F_LYS_272 | NZ  | L_ASP_54  | OD1 | 2.876 |
| 5KEM | F_LYS_272 | NZ  | L_ASP_54  | OD2 | 3.185 |
| 5KEM | F_LYS_272 | NZ  | F_GLU_235 | OE2 | 2.870 |

Table 21: 5KEM-specific salt bridging network analysis. In this table, the residue naming scheme is **Chain ID\_residue name\_residue number**

| PDB ID | Residue A | Atom A | Residue B | Atom B | Distance (Å) |
|--------|-----------|--------|-----------|--------|--------------|
| 5KEN   | A_ARG_54  | NH2    | A_ASP_55  | OD2    | 3.882        |
| 5KEN   | A_ARG_85  | NH2    | A_GLU_178 | OE1    | 3.646        |
| 5KEN   | A_ARG_85  | NH2    | A_GLU_178 | OE2    | 2.914        |
| 5KEN   | A_ARG_130 | NH2    | A_ASP_163 | OD1    | 3.381        |
| 5KEN   | A_ARG_134 | NH2    | B_GLU_545 | OE1    | 2.859        |
| 5KEN   | A_ARG_136 | NH1    | A_GLU_106 | OE2    | 2.734        |
| 5KEN   | A_LYS_140 | NZ     | A_GLU_112 | OE2    | 3.961        |
| 5KEN   | A_HIS_154 | NE2    | A_GLU_178 | OE1    | 2.777        |
| 5KEN   | A_ARG_164 | NH2    | A_GLU_100 | OE1    | 3.828        |
| 5KEN   | A_ARG_164 | NH2    | A_GLU_100 | OE2    | 3.033        |
| 5KEN   | A_ARG_172 | NH2    | A_GLU_112 | OE1    | 3.530        |
| 5KEN   | B_LYS_510 | NZ     | D_GLU_56  | OE1    | 3.639        |
| 5KEN   | B_LYS_510 | NZ     | D_GLU_56  | OE2    | 2.773        |
| 5KEN   | B_HIS_549 | NE2    | C_ASP_52  | OD1    | 3.874        |
| 5KEN   | B_ARG_559 | NH1    | A_GLU_103 | OE1    | 3.709        |
| 5KEN   | B_ARG_559 | NH1    | A_GLU_103 | OE2    | 2.818        |
| 5KEN   | B_ARG_559 | NH2    | A_GLU_103 | OE1    | 3.114        |
| 5KEN   | B_ARG_559 | NH2    | A_GLU_103 | OE2    | 3.662        |
| 5KEN   | B_ARG_596 | NH2    | B_ASP_607 | OD1    | 3.053        |
| 5KEN   | C_LYS_38  | NZ     | C_GLU_46  | OE1    | 2.804        |
| 5KEN   | C_LYS_38  | NZ     | C_GLU_46  | OE2    | 3.887        |
| 5KEN   | D_ARG_61  | NH2    | D_GLU_81  | OE2    | 2.826        |
| 5KEN   | D_ARG_61  | NH2    | D_ASP_82  | OD1    | 3.556        |
| 5KEN   | D_ARG_61  | NH2    | D_ASP_82  | OD2    | 2.823        |
| 5KEN   | D_LYS_107 | NZ     | D_GLU_17  | OE1    | 3.537        |
| 5KEN   | D_LYS_107 | NZ     | D_GLU_17  | OE2    | 2.886        |
| 5KEN   | E_HIS_39  | ND1    | E_ASP_55  | OD1    | 2.715        |
| 5KEN   | E_HIS_39  | ND1    | E_ASP_55  | OD2    | 3.363        |
| 5KEN   | E_ARG_85  | NH2    | E_GLU_178 | OE1    | 3.714        |
| 5KEN   | E_ARG_85  | NH2    | E_GLU_178 | OE2    | 3.034        |
| 5KEN   | E_ARG_130 | NH1    | E_ASP_163 | OD1    | 2.771        |
| 5KEN   | E_ARG_136 | NH1    | E_GLU_106 | OE2    | 2.733        |
| 5KEN   | E_LYS_140 | NZ     | E_GLU_112 | OE2    | 2.756        |
| 5KEN   | E_HIS_154 | NE2    | E_GLU_178 | OE1    | 2.772        |
| 5KEN   | E_ARG_164 | NH2    | E_GLU_100 | OE1    | 3.488        |
| 5KEN   | E_ARG_164 | NH2    | E_GLU_100 | OE2    | 3.760        |
| 5KEN   | E_LYS_272 | NZ     | J_ASP_54  | OD2    | 3.722        |
| 5KEN   | E_LYS_272 | NZ     | J_ASP_56  | OD1    | 3.736        |
| 5KEN   | E_LYS_272 | NZ     | J_ASP_56  | OD2    | 2.765        |
| 5KEN   | E_LYS_276 | NZ     | E_GLU_245 | OE1    | 3.431        |
| 5KEN   | E_LYS_276 | NZ     | E_GLU_245 | OE2    | 2.793        |
| 5KEN   | E_ARG_299 | NH1    | E_GLU_304 | OE1    | 2.918        |
| 5KEN   | E_ARG_299 | NH1    | E_GLU_305 | OE2    | 3.083        |
| 5KEN   | E_ARG_299 | NH2    | E_GLU_305 | OE2    | 2.937        |
| 5KEN   | E_ARG_302 | NH1    | E_GLU_304 | OE2    | 2.810        |
| 5KEN   | E_ARG_302 | NH2    | E_GLU_258 | OE2    | 2.806        |
| 5KEN   | F_LYS_510 | NZ     | H_GLU_56  | OE2    | 2.720        |
| 5KEN   | F_HIS_516 | NE2    | F_GLU_545 | OE1    | 2.865        |
| 5KEN   | F_HIS_549 | NE2    | G_ASP_52  | OD1    | 3.491        |
| 5KEN   | F_ARG_559 | NH1    | E_GLU_103 | OE1    | 3.868        |
| 5KEN   | F_ARG_559 | NH1    | E_GLU_103 | OE2    | 2.947        |
| 5KEN   | F_ARG_559 | NH2    | E_GLU_103 | OE1    | 3.043        |
| 5KEN   | F_ARG_559 | NH2    | E_GLU_103 | OE2    | 3.542        |
| 5KEN   | F_ARG_596 | NH2    | F_ASP_607 | OD1    | 2.978        |
| 5KEN   | F_HIS_613 | ND1    | F_ASP_614 | OD2    | 3.831        |
| 5KEN   | G_LYS_38  | NZ     | G_GLU_46  | OE1    | 2.811        |
| 5KEN   | G_LYS_38  | NZ     | G_GLU_46  | OE2    | 3.954        |

|      |           |     |           |     |       |
|------|-----------|-----|-----------|-----|-------|
| 5KEN | G_LYS_62  | NZ  | H_ASP_1   | OD2 | 2.735 |
| 5KEN | H_ARG_61  | NH2 | H_GLU_81  | OE2 | 2.864 |
| 5KEN | H_ARG_61  | NH2 | H_ASP_82  | OD1 | 3.570 |
| 5KEN | H_ARG_61  | NH2 | H_ASP_82  | OD2 | 2.811 |
| 5KEN | H_LYS_107 | NZ  | H_GLU_17  | OE1 | 3.562 |
| 5KEN | H_LYS_107 | NZ  | H_GLU_17  | OE2 | 2.967 |
| 5KEN | I_LYS_24  | NZ  | I_ASP_70  | OD1 | 2.714 |
| 5KEN | I_LYS_24  | NZ  | I_ASP_70  | OD2 | 3.786 |
| 5KEN | I_ARG_54  | NH1 | I_ASP_60  | OD1 | 3.072 |
| 5KEN | I_ARG_61  | NH1 | I_GLU_81  | OE2 | 3.750 |
| 5KEN | I_ARG_61  | NH2 | I_GLU_81  | OE2 | 2.708 |
| 5KEN | I_ARG_61  | NH2 | I_ASP_82  | OD1 | 2.808 |
| 5KEN | I_ARG_61  | NH2 | I_ASP_82  | OD2 | 3.337 |
| 5KEN | I_LYS_103 | NZ  | I_GLU_105 | OE2 | 2.881 |
| 5KEN | I_ARG_107 | NH2 | I_GLU_105 | OE1 | 2.726 |
| 5KEN | J_LYS_3   | NZ  | J_ASP_1   | OD1 | 2.794 |
| 5KEN | J_LYS_3   | NZ  | J_ASP_1   | OD2 | 3.424 |
| 5KEN | J_ARG_38  | NH1 | J_ASP_86  | OD1 | 3.024 |
| 5KEN | J_ARG_38  | NH2 | J_GLU_46  | OE1 | 3.864 |
| 5KEN | J_ARG_38  | NH2 | J_GLU_46  | OE2 | 3.398 |
| 5KEN | J_ARG_38  | NH2 | J_ASP_86  | OD1 | 3.399 |
| 5KEN | J_LYS_71  | NZ  | J_ASP_55  | OD1 | 2.827 |
| 5KEN | J_ARG_75  | NH2 | J_ASP_72  | OD2 | 2.956 |
| 5KEN | K_HIS_39  | ND1 | K_ASP_55  | OD1 | 2.793 |
| 5KEN | K_HIS_39  | ND1 | K_ASP_55  | OD2 | 3.278 |
| 5KEN | K_ARG_85  | NH2 | K_GLU_178 | OE1 | 3.673 |
| 5KEN | K_ARG_85  | NH2 | K_GLU_178 | OE2 | 3.020 |
| 5KEN | K_LYS_115 | NZ  | K_ASP_150 | OD1 | 3.600 |
| 5KEN | K_ARG_130 | NH2 | K_ASP_163 | OD1 | 3.177 |
| 5KEN | K_ARG_130 | NH2 | K_ASP_163 | OD2 | 3.766 |
| 5KEN | K_ARG_136 | NH1 | K_GLU_106 | OE2 | 2.803 |
| 5KEN | K_LYS_140 | NZ  | K_GLU_112 | OE2 | 2.762 |
| 5KEN | K_HIS_154 | NE2 | K_GLU_178 | OE1 | 2.705 |
| 5KEN | K_ARG_164 | NH2 | K_GLU_100 | OE1 | 3.437 |
| 5KEN | K_ARG_164 | NH2 | K_GLU_100 | OE2 | 3.533 |
| 5KEN | K_ARG_219 | NH1 | K_GLU_235 | OE2 | 2.859 |
| 5KEN | K_ARG_219 | NH2 | K_GLU_235 | OE2 | 2.957 |
| 5KEN | K_LYS_272 | NZ  | K_GLU_235 | OE1 | 3.796 |
| 5KEN | K_LYS_272 | NZ  | Q_ASP_54  | OD2 | 3.814 |
| 5KEN | K_LYS_272 | NZ  | Q_ASP_56  | OD1 | 3.710 |
| 5KEN | K_LYS_272 | NZ  | Q_ASP_56  | OD2 | 2.769 |
| 5KEN | K_ARG_299 | NH1 | K_GLU_304 | OE1 | 2.978 |
| 5KEN | K_ARG_299 | NH1 | K_GLU_305 | OE2 | 3.152 |
| 5KEN | K_ARG_299 | NH2 | K_GLU_305 | OE2 | 2.878 |
| 5KEN | K_ARG_302 | NH1 | K_GLU_304 | OE2 | 2.982 |
| 5KEN | K_ARG_302 | NH2 | K_GLU_258 | OE2 | 2.830 |
| 5KEN | M_LYS_510 | NZ  | O_GLU_56  | OE2 | 2.667 |
| 5KEN | M_HIS_516 | NE2 | M_GLU_545 | OE1 | 2.888 |
| 5KEN | M_ARG_559 | NH1 | K_GLU_103 | OE1 | 3.708 |
| 5KEN | M_ARG_559 | NH1 | K_GLU_103 | OE2 | 2.824 |
| 5KEN | M_ARG_559 | NH2 | K_GLU_103 | OE1 | 3.090 |
| 5KEN | M_ARG_559 | NH2 | K_GLU_103 | OE2 | 3.645 |
| 5KEN | M_ARG_596 | NH2 | M_ASP_607 | OD1 | 2.995 |
| 5KEN | N_LYS_38  | NZ  | N_ASP_86  | OD1 | 3.887 |
| 5KEN | N_LYS_62  | NZ  | O_ASP_1   | OD2 | 2.793 |
| 5KEN | O_ARG_61  | NH2 | O_GLU_81  | OE2 | 3.700 |
| 5KEN | O_ARG_61  | NH2 | O_ASP_82  | OD1 | 3.662 |
| 5KEN | O_ARG_61  | NH2 | O_ASP_82  | OD2 | 2.905 |

|      |           |     |           |     |       |
|------|-----------|-----|-----------|-----|-------|
| 5KEN | O_LYS_107 | NZ  | O_GLU_17  | OE1 | 3.531 |
| 5KEN | O_LYS_107 | NZ  | O_GLU_17  | OE2 | 2.981 |
| 5KEN | P_LYS_24  | NZ  | P_ASP_70  | OD1 | 2.736 |
| 5KEN | P_LYS_24  | NZ  | P_ASP_70  | OD2 | 3.714 |
| 5KEN | P_ARG_54  | NH1 | P_ASP_60  | OD1 | 2.965 |
| 5KEN | P_ARG_61  | NH1 | P_GLU_81  | OE2 | 3.801 |
| 5KEN | P_ARG_61  | NH2 | P_GLU_81  | OE2 | 2.727 |
| 5KEN | P_ARG_61  | NH2 | P_ASP_82  | OD1 | 2.822 |
| 5KEN | P_ARG_61  | NH2 | P_ASP_82  | OD2 | 3.338 |
| 5KEN | P_ARG_107 | NH1 | P_GLU_105 | OE2 | 2.824 |
| 5KEN | Q_LYS_3   | NZ  | Q_ASP_1   | OD1 | 2.773 |
| 5KEN | Q_LYS_3   | NZ  | Q_ASP_1   | OD2 | 3.470 |
| 5KEN | Q_ARG_38  | NH1 | Q_ASP_86  | OD1 | 3.016 |
| 5KEN | Q_ARG_38  | NH2 | Q_GLU_46  | OE1 | 3.835 |
| 5KEN | Q_ARG_38  | NH2 | Q_GLU_46  | OE2 | 3.412 |
| 5KEN | Q_ARG_38  | NH2 | Q_ASP_86  | OD1 | 3.365 |
| 5KEN | Q_LYS_71  | NZ  | Q_ASP_55  | OD1 | 2.819 |
| 5KEN | Q_ARG_75  | NH2 | Q_ASP_72  | OD2 | 2.942 |

Table 22: 5KEN-specific salt bridging network analysis. In this table, the residue naming scheme is **Chain ID\_residue name\_residue number**

| PDB ID  | Residue A | Atom A | Residue B | Atom B | Distance (Å) |
|---------|-----------|--------|-----------|--------|--------------|
| 5T42-13 | A_LYS_633 | NZ     | A_ASP_642 | OD2    | 2.906        |
| 5T42-5  | A_LYS_633 | NZ     | A_ASP_642 | OD2    | 3.987        |
| 5T42-8  | A_LYS_633 | NZ     | A_ASP_642 | OD2    | 2.592        |

Table 23: 5T42-specific salt bridging network analysis. In this table, the residue naming scheme is **Chain ID\_residue name\_residue number**

| PDB ID | Residue A | Atom A | Residue B | Atom B | Distance (Å) |
|--------|-----------|--------|-----------|--------|--------------|
| 6DZL   | A_ARG_85  | NH2    | A_GLU_178 | OE1    | 3.930        |
| 6DZL   | J_ARG_61  | NH2    | J_ASP_82  | OD2    | 3.985        |
| 6DZL   | G_ARG_38  | NH1    | G_ASP_86  | OD1    | 2.843        |
| 6DZL   | G_ARG_38  | NH2    | G_GLU_46  | OE1    | 3.120        |
| 6DZL   | G_ARG_38  | NH2    | G_GLU_46  | OE2    | 3.080        |
| 6DZL   | G_ARG_66  | NH2    | G_ASP_86  | OD2    | 3.660        |
| 6DZL   | G_HIS_96  | ND1    | J_GLU_55  | OE2    | 3.342        |
| 6DZL   | G_HIS_96  | NE2    | J_GLU_55  | OE1    | 3.570        |
| 6DZL   | G_HIS_96  | NE2    | J_GLU_55  | OE2    | 3.728        |
| 6DZL   | B_ARG_85  | NH2    | B_GLU_178 | OE1    | 3.931        |
| 6DZL   | K_ARG_61  | NH2    | K_ASP_82  | OD2    | 3.984        |
| 6DZL   | H_ARG_38  | NH1    | H_ASP_86  | OD1    | 2.845        |
| 6DZL   | H_ARG_38  | NH2    | H_GLU_46  | OE1    | 3.120        |
| 6DZL   | H_ARG_38  | NH2    | H_GLU_46  | OE2    | 3.080        |
| 6DZL   | H_ARG_66  | NH2    | H_ASP_86  | OD2    | 3.660        |
| 6DZL   | H_HIS_96  | ND1    | K_GLU_55  | OE2    | 3.341        |
| 6DZL   | H_HIS_96  | NE2    | K_GLU_55  | OE1    | 3.571        |
| 6DZL   | H_HIS_96  | NE2    | K_GLU_55  | OE2    | 3.727        |
| 6DZL   | C_ARG_85  | NH2    | C_GLU_178 | OE1    | 3.930        |
| 6DZL   | L_ARG_61  | NH2    | L_ASP_82  | OD2    | 3.984        |
| 6DZL   | I_ARG_38  | NH1    | I_ASP_86  | OD1    | 2.844        |
| 6DZL   | I_ARG_38  | NH2    | I_GLU_46  | OE1    | 3.120        |
| 6DZL   | I_ARG_38  | NH2    | I_GLU_46  | OE2    | 3.080        |
| 6DZL   | I_ARG_66  | NH2    | I_ASP_86  | OD2    | 3.660        |
| 6DZL   | I_HIS_96  | ND1    | L_GLU_55  | OE2    | 3.341        |
| 6DZL   | I_HIS_96  | NE2    | L_GLU_55  | OE1    | 3.571        |
| 6DZL   | I_HIS_96  | NE2    | L_GLU_55  | OE2    | 3.727        |

Table 24: 6DZL-specific salt bridging network analysis. In this table, the residue naming scheme is **Chain ID\_residue name\_residue number**

| PDB ID | Residue A | Atom A | Residue B | Atom B | Distance (Å) |
|--------|-----------|--------|-----------|--------|--------------|
| 6EA7   | A_ARG_64  | NH1    | A_GLU_100 | OE1    | 2.585        |
| 6EA7   | A_ARG_64  | NH1    | A_GLU_100 | OE2    | 2.698        |
| 6EA7   | A_ARG_85  | NH1    | A_GLU_178 | OE2    | 3.995        |
| 6EA7   | A_LYS_114 | NZ     | A_GLU_120 | OE2    | 3.917        |
| 6EA7   | A_ARG_136 | NH1    | A_GLU_106 | OE1    | 3.638        |
| 6EA7   | A_HIS_154 | NE2    | A_GLU_178 | OE1    | 2.817        |
| 6EA7   | A_ARG_164 | NH1    | A_ASP_163 | OD1    | 3.751        |
| 6EA7   | A_ARG_164 | NH1    | A_ASP_163 | OD2    | 3.561        |
| 6EA7   | A_ARG_172 | NH1    | A_GLU_120 | OE2    | 3.778        |
| 6EA7   | B_HIS_516 | NE2    | B_GLU_545 | OE1    | 3.238        |
| 6EA7   | B_ARG_559 | NH1    | A_GLU_103 | OE1    | 2.641        |
| 6EA7   | B_ARG_559 | NH1    | A_GLU_103 | OE2    | 3.432        |
| 6EA7   | B_ARG_559 | NH2    | A_GLU_103 | OE2    | 3.686        |
| 6EA7   | B_HIS_602 | ND1    | F_GLU_611 | OE1    | 3.135        |
| 6EA7   | C_HIS_39  | NE2    | C_ASP_55  | OD1    | 3.559        |
| 6EA7   | C_ARG_85  | NH1    | C_GLU_178 | OE1    | 3.607        |
| 6EA7   | C_ARG_85  | NH1    | C_GLU_178 | OE2    | 3.196        |
| 6EA7   | C_LYS_114 | NZ     | C_GLU_120 | OE2    | 3.697        |
| 6EA7   | C_ARG_130 | NH2    | C_ASP_163 | OD2    | 2.578        |
| 6EA7   | C_ARG_164 | NH1    | C_ASP_163 | OD1    | 3.787        |
| 6EA7   | C_ARG_172 | NH1    | C_GLU_120 | OE2    | 3.868        |
| 6EA7   | D_HIS_516 | NE2    | D_GLU_545 | OE1    | 3.935        |
| 6EA7   | D_ARG_559 | NH1    | C_GLU_103 | OE1    | 2.573        |
| 6EA7   | D_ARG_559 | NH1    | C_GLU_103 | OE2    | 3.488        |
| 6EA7   | D_ARG_559 | NH2    | C_GLU_103 | OE1    | 3.832        |
| 6EA7   | D_ARG_559 | NH2    | C_GLU_103 | OE2    | 3.318        |
| 6EA7   | D_HIS_602 | ND1    | B_GLU_611 | OE1    | 3.062        |
| 6EA7   | E_ARG_85  | NH1    | E_GLU_178 | OE1    | 3.412        |
| 6EA7   | E_ARG_85  | NH1    | E_GLU_178 | OE2    | 3.298        |
| 6EA7   | E_ARG_130 | NH2    | E_ASP_163 | OD2    | 2.654        |
| 6EA7   | E_HIS_154 | NE2    | E_GLU_178 | OE1    | 3.949        |
| 6EA7   | E_ARG_164 | NH1    | E_ASP_163 | OD1    | 3.520        |
| 6EA7   | E_ARG_164 | NH1    | E_ASP_163 | OD2    | 3.465        |
| 6EA7   | E_ARG_172 | NH2    | E_GLU_120 | OE2    | 3.923        |
| 6EA7   | F_ARG_559 | NH1    | E_GLU_103 | OE1    | 2.812        |
| 6EA7   | F_ARG_559 | NH1    | E_GLU_103 | OE2    | 3.584        |
| 6EA7   | F_ARG_559 | NH2    | E_GLU_103 | OE2    | 3.608        |
| 6EA7   | F_ARG_596 | NH2    | E_ASP_55  | OD1    | 2.483        |
| 6EA7   | F_ARG_596 | NH2    | E_ASP_55  | OD2    | 3.342        |
| 6EA7   | F_HIS_602 | ND1    | D_GLU_611 | OE1    | 3.253        |
| 6EA7   | H_ARG_38  | NH1    | H_GLU_46  | OE1    | 3.611        |
| 6EA7   | H_ARG_38  | NH1    | H_ASP_90  | OD1    | 3.414        |
| 6EA7   | H_ARG_38  | NH2    | H_GLU_46  | OE1    | 2.876        |
| 6EA7   | H_ARG_38  | NH2    | H_GLU_46  | OE2    | 3.020        |
| 6EA7   | H_HIS_100 | ND1    | H_ASP_110 | OD2    | 3.934        |
| 6EA7   | H_HIS_100 | ND1    | L_GLU_55  | OE1    | 3.325        |
| 6EA7   | H_HIS_100 | NE2    | L_GLU_55  | OE1    | 3.655        |
| 6EA7   | H_HIS_108 | NE2    | L_ASP_50  | OD1    | 2.912        |
| 6EA7   | H_HIS_173 | ND1    | L_ASP_166 | OD1    | 3.947        |
| 6EA7   | H_HIS_173 | ND1    | L_ASP_166 | OD2    | 3.590        |
| 6EA7   | H_LYS_218 | NZ     | L_GLU_122 | OE1    | 2.826        |
| 6EA7   | L_LYS_39  | NZ     | L_GLU_42  | OE1    | 3.713        |
| 6EA7   | L_LYS_39  | NZ     | L_ASP_81  | OD1    | 3.700        |
| 6EA7   | L_ARG_61  | NH2    | L_ASP_82  | OD1    | 2.764        |
| 6EA7   | L_ARG_61  | NH2    | L_ASP_82  | OD2    | 3.165        |
| 6EA7   | L_LYS_102 | NZ     | L_GLU_164 | OE1    | 3.631        |
| 6EA7   | L_LYS_148 | NZ     | L_GLU_194 | OE1    | 3.419        |

|      |           |     |           |     |       |
|------|-----------|-----|-----------|-----|-------|
| 6EA7 | M_ARG_38  | NH1 | M_GLU_46  | OE1 | 3.632 |
| 6EA7 | M_ARG_38  | NH2 | M_GLU_46  | OE1 | 2.819 |
| 6EA7 | M_ARG_38  | NH2 | M_GLU_46  | OE2 | 3.086 |
| 6EA7 | M_ARG_67  | NH1 | M_ASP_90  | OD1 | 3.655 |
| 6EA7 | M_ARG_67  | NH1 | M_ASP_90  | OD2 | 3.008 |
| 6EA7 | M_ARG_67  | NH2 | M_ASP_90  | OD1 | 2.976 |
| 6EA7 | M_ARG_67  | NH2 | M_ASP_90  | OD2 | 2.990 |
| 6EA7 | M_HIS_100 | ND1 | N_GLU_55  | OE1 | 3.446 |
| 6EA7 | M_HIS_100 | ND1 | N_GLU_55  | OE2 | 3.681 |
| 6EA7 | M_HIS_108 | ND1 | N_ASP_50  | OD1 | 3.757 |
| 6EA7 | M_HIS_108 | NE2 | N_ASP_50  | OD1 | 3.718 |
| 6EA7 | M_HIS_173 | ND1 | N_ASP_166 | OD2 | 3.701 |
| 6EA7 | M_LYS_219 | NZ  | M_GLU_221 | OE1 | 3.040 |
| 6EA7 | N_LYS_39  | NZ  | N_ASP_81  | OD1 | 3.604 |
| 6EA7 | N_ARG_61  | NH2 | N_ASP_82  | OD1 | 2.680 |
| 6EA7 | N_ARG_61  | NH2 | N_ASP_82  | OD2 | 3.258 |
| 6EA7 | N_LYS_102 | NZ  | N_GLU_164 | OE1 | 3.534 |
| 6EA7 | N_LYS_148 | NZ  | N_GLU_194 | OE1 | 3.192 |
| 6EA7 | N_HIS_188 | ND1 | N_ASP_150 | OD2 | 3.491 |
| 6EA7 | Q_ARG_38  | NH1 | Q_GLU_46  | OE1 | 3.581 |
| 6EA7 | Q_ARG_38  | NH2 | Q_GLU_46  | OE1 | 3.006 |
| 6EA7 | Q_ARG_38  | NH2 | Q_GLU_46  | OE2 | 3.019 |
| 6EA7 | Q_ARG_67  | NH1 | Q_ASP_90  | OD1 | 3.489 |
| 6EA7 | Q_ARG_67  | NH1 | Q_ASP_90  | OD2 | 2.319 |
| 6EA7 | Q_ARG_67  | NH2 | Q_ASP_90  | OD1 | 3.689 |
| 6EA7 | Q_ARG_67  | NH2 | Q_ASP_90  | OD2 | 3.153 |
| 6EA7 | Q_HIS_108 | NE2 | R_ASP_50  | OD1 | 3.227 |
| 6EA7 | Q_HIS_173 | ND1 | R_ASP_166 | OD1 | 3.817 |
| 6EA7 | Q_HIS_173 | ND1 | R_ASP_166 | OD2 | 3.600 |
| 6EA7 | R_ARG_24  | NH1 | R_GLU_70  | OE1 | 2.987 |
| 6EA7 | R_ARG_24  | NH1 | R_GLU_70  | OE2 | 2.873 |
| 6EA7 | R_LYS_39  | NZ  | R_GLU_42  | OE1 | 3.837 |
| 6EA7 | R_LYS_39  | NZ  | R_ASP_81  | OD1 | 3.859 |
| 6EA7 | R_ARG_61  | NH2 | R_ASP_82  | OD1 | 2.608 |
| 6EA7 | R_ARG_61  | NH2 | R_ASP_82  | OD2 | 3.334 |
| 6EA7 | R_LYS_102 | NZ  | R_GLU_164 | OE1 | 3.378 |
| 6EA7 | R_LYS_106 | NZ  | R_GLU_104 | OE1 | 3.728 |
| 6EA7 | R_LYS_148 | NZ  | R_GLU_194 | OE1 | 3.641 |

Table 25: 6EA7-specific salt bridging network analysis. In this table, the residue naming scheme is **Chain ID\_residue name\_residue number**

| PDB ID | Residue A | Atom A | Residue B | Atom B | Distance (Å) |
|--------|-----------|--------|-----------|--------|--------------|
| 6F5U   | A_HIS_39  | NE2    | A_ASP_55  | OD1    | 3.607        |
| 6F5U   | A_HIS_39  | NE2    | A_ASP_55  | OD2    | 3.205        |
| 6F5U   | A_ARG_85  | NH1    | A_GLU_178 | OE1    | 3.593        |
| 6F5U   | A_ARG_85  | NH1    | A_GLU_178 | OE2    | 2.633        |
| 6F5U   | A_LYS_114 | NZ     | A_GLU_120 | OE2    | 3.481        |
| 6F5U   | A_ARG_130 | NH2    | A_ASP_163 | OD2    | 3.086        |
| 6F5U   | A_HIS_154 | NE2    | A_GLU_178 | OE1    | 2.646        |
| 6F5U   | A_ARG_164 | NH1    | A_ASP_163 | OD1    | 3.541        |
| 6F5U   | A_ARG_164 | NH1    | A_ASP_163 | OD2    | 3.126        |
| 6F5U   | A_ARG_247 | NH2    | A_GLU_245 | OE1    | 3.242        |
| 6F5U   | A_ARG_266 | NH2    | A_ASP_237 | OD2    | 3.400        |
| 6F5U   | B_LYS_510 | NZ     | A_GLU_292 | OE1    | 3.345        |
| 6F5U   | B_HIS_516 | NE2    | B_GLU_545 | OE1    | 2.737        |
| 6F5U   | B_ARG_559 | NH1    | A_GLU_103 | OE1    | 2.631        |
| 6F5U   | B_ARG_559 | NH1    | A_GLU_103 | OE2    | 3.833        |
| 6F5U   | B_ARG_559 | NH2    | A_GLU_103 | OE1    | 3.290        |
| 6F5U   | B_ARG_559 | NH2    | A_GLU_103 | OE2    | 2.992        |

Table 26: 6F5U-specific salt bridging network analysis. In this table, the residue naming scheme is **Chain ID\_residue name\_residue number**

| PDB ID | Residue A | Atom A | Residue B | Atom B | Distance (Å) |
|--------|-----------|--------|-----------|--------|--------------|
| 6F6I   | A_ARG_85  | NH1    | A_GLU_178 | OE1    | 3.391        |
| 6F6I   | A_ARG_85  | NH1    | A_GLU_178 | OE2    | 2.492        |
| 6F6I   | A_LYS_114 | NZ     | A_GLU_120 | OE2    | 3.662        |
| 6F6I   | A_ARG_130 | NH2    | A_ASP_163 | OD1    | 3.094        |
| 6F6I   | A_LYS_140 | NZ     | A_GLU_112 | OE2    | 3.920        |
| 6F6I   | A_HIS_154 | NE2    | A_GLU_178 | OE1    | 2.814        |
| 6F6I   | A_ARG_164 | NH1    | A_ASP_163 | OD1    | 3.155        |
| 6F6I   | A_ARG_164 | NH1    | A_ASP_163 | OD2    | 3.520        |
| 6F6I   | A_ARG_247 | NH2    | A_GLU_245 | OE2    | 2.546        |
| 6F6I   | A_ARG_266 | NH2    | A_ASP_237 | OD2    | 3.974        |
| 6F6I   | B_LYS_510 | NZ     | A_GLU_292 | OE1    | 3.377        |
| 6F6I   | B_HIS_516 | NE2    | B_GLU_545 | OE1    | 2.567        |
| 6F6I   | B_ARG_559 | NH1    | A_GLU_103 | OE1    | 3.800        |
| 6F6I   | B_ARG_559 | NH1    | A_GLU_103 | OE2    | 2.815        |
| 6F6I   | B_ARG_559 | NH2    | A_GLU_103 | OE1    | 3.096        |
| 6F6I   | B_ARG_559 | NH2    | A_GLU_103 | OE2    | 3.529        |
| 6F6I   | B_HIS_628 | ND1    | B_ASP_629 | OD1    | 3.915        |
| 6F6I   | B_HIS_628 | NE2    | B_ASP_629 | OD1    | 3.799        |

Table 27: 6F6I-specific salt bridging network analysis. In this table, the residue naming scheme is **Chain ID\_residue name\_residue number**

| PDB ID | Residue A | Atom A | Residue B | Atom B | Distance (Å) |
|--------|-----------|--------|-----------|--------|--------------|
| 6F6N   | A_LYS_50  | NZ     | A_ASP_49  | OD1    | 3.536        |
| 6F6N   | A_LYS_50  | NZ     | A_ASP_49  | OD2    | 3.944        |
| 6F6N   | A_ARG_85  | NH1    | A_GLU_178 | OE1    | 3.489        |
| 6F6N   | A_ARG_85  | NH1    | A_GLU_178 | OE2    | 2.503        |
| 6F6N   | A_LYS_114 | NZ     | A_GLU_120 | OE2    | 3.710        |
| 6F6N   | A_ARG_130 | NH2    | A_ASP_163 | OD2    | 3.005        |
| 6F6N   | A_HIS_154 | NE2    | A_GLU_178 | OE1    | 2.727        |
| 6F6N   | A_ARG_164 | NH1    | A_ASP_163 | OD1    | 3.435        |
| 6F6N   | A_ARG_164 | NH1    | A_ASP_163 | OD2    | 2.950        |
| 6F6N   | A_ARG_247 | NH1    | A_GLU_245 | OE1    | 3.669        |
| 6F6N   | A_ARG_266 | NH2    | A_ASP_237 | OD2    | 3.429        |
| 6F6N   | A_LYS_276 | NZ     | A_GLU_245 | OE2    | 2.564        |
| 6F6N   | B_LYS_510 | NZ     | A_GLU_292 | OE1    | 2.639        |
| 6F6N   | B_HIS_516 | NE2    | B_GLU_545 | OE1    | 2.799        |
| 6F6N   | B_ARG_559 | NH1    | A_GLU_103 | OE1    | 2.593        |
| 6F6N   | B_ARG_559 | NH1    | A_GLU_103 | OE2    | 3.789        |
| 6F6N   | B_ARG_559 | NH2    | A_GLU_103 | OE1    | 3.215        |
| 6F6N   | B_ARG_559 | NH2    | A_GLU_103 | OE2    | 2.904        |
| 6F6N   | B_LYS_588 | NZ     | A_ASP_47  | OD1    | 3.696        |
| 6F6N   | B_LYS_588 | NZ     | A_ASP_47  | OD2    | 2.975        |

Table 28: 6F6N-specific salt bridging network analysis. In this table, the residue naming scheme is **Chain ID\_residue name\_residue number**

| PDB ID | Residue A | Atom A | Residue B | Atom B | Distance (Å) |
|--------|-----------|--------|-----------|--------|--------------|
| 6F6S   | A_ARG_85  | NH1    | A_GLU_178 | OE1    | 3.259        |
| 6F6S   | A_ARG_85  | NH1    | A_GLU_178 | OE2    | 2.372        |
| 6F6S   | A_LYS_114 | NZ     | A_GLU_120 | OE2    | 3.380        |
| 6F6S   | A_ARG_130 | NH2    | A_ASP_163 | OD1    | 3.014        |
| 6F6S   | A_HIS_154 | NE2    | A_GLU_178 | OE1    | 3.039        |
| 6F6S   | A_ARG_164 | NH1    | A_ASP_163 | OD1    | 2.810        |
| 6F6S   | A_ARG_164 | NH1    | A_ASP_163 | OD2    | 3.556        |
| 6F6S   | B_LYS_510 | NZ     | A_GLU_292 | OE1    | 2.331        |
| 6F6S   | B_LYS_510 | NZ     | A_GLU_292 | OE2    | 3.397        |
| 6F6S   | B_HIS_516 | NE2    | B_GLU_545 | OE1    | 2.731        |
| 6F6S   | B_ARG_559 | NH1    | A_GLU_103 | OE1    | 2.656        |
| 6F6S   | B_ARG_559 | NH1    | A_GLU_103 | OE2    | 3.920        |
| 6F6S   | B_ARG_559 | NH2    | A_GLU_103 | OE1    | 3.146        |
| 6F6S   | B_ARG_559 | NH2    | A_GLU_103 | OE2    | 2.951        |
| 6F6S   | B_LYS_588 | NZ     | A_ASP_47  | OD1    | 2.944        |
| 6F6S   | B_LYS_588 | NZ     | A_ASP_47  | OD2    | 2.772        |
| 6F6S   | B_LYS_617 | NZ     | B_ASP_614 | OD1    | 3.893        |

Table 29: 6F6S-specific salt bridging network analysis. In this table, the residue naming scheme is **Chain ID\_residue name\_residue number**

| PDB ID | Residue A | Atom A | Residue B | Atom B | Distance (Å) |
|--------|-----------|--------|-----------|--------|--------------|
| 6G95   | A_HIS_39  | NE2    | A_ASP_55  | OD1    | 2.899        |
| 6G95   | A_HIS_39  | NE2    | A_ASP_55  | OD2    | 3.064        |
| 6G95   | A_ARG_85  | NH1    | A_GLU_178 | OE1    | 3.522        |
| 6G95   | A_ARG_85  | NH1    | A_GLU_178 | OE2    | 2.681        |
| 6G95   | A_LYS_114 | NZ     | A_GLU_120 | OE1    | 3.918        |
| 6G95   | A_LYS_114 | NZ     | A_GLU_120 | OE2    | 3.675        |
| 6G95   | A_ARG_130 | NH2    | A_ASP_163 | OD1    | 3.040        |
| 6G95   | A_LYS_140 | NZ     | A_GLU_112 | OE1    | 3.777        |
| 6G95   | A_HIS_154 | NE2    | A_GLU_178 | OE1    | 2.904        |
| 6G95   | A_ARG_164 | NH1    | A_ASP_163 | OD1    | 2.830        |
| 6G95   | A_ARG_164 | NH1    | A_ASP_163 | OD2    | 3.454        |
| 6G95   | A_ARG_266 | NH2    | A_ASP_237 | OD2    | 3.135        |
| 6G95   | B_HIS_516 | NE2    | B_GLU_545 | OE1    | 2.525        |
| 6G95   | B_ARG_559 | NH1    | A_GLU_103 | OE1    | 2.683        |
| 6G95   | B_ARG_559 | NH1    | A_GLU_103 | OE2    | 3.879        |
| 6G95   | B_ARG_559 | NH2    | A_GLU_103 | OE1    | 3.249        |
| 6G95   | B_ARG_559 | NH2    | A_GLU_103 | OE2    | 2.973        |

Table 30: 6G95-specific salt bridging network analysis. In this table, the residue naming scheme is **Chain ID\_residue name\_residue number**

| PDB ID | Residue A | Atom A | Residue B | Atom B | Distance (Å) |
|--------|-----------|--------|-----------|--------|--------------|
| 6G9B   | A_ARG_85  | NH1    | A_GLU_178 | OE1    | 3.384        |
| 6G9B   | A_ARG_85  | NH1    | A_GLU_178 | OE2    | 2.574        |
| 6G9B   | A_LYS_114 | NZ     | A_GLU_120 | OE1    | 3.989        |
| 6G9B   | A_LYS_114 | NZ     | A_GLU_120 | OE2    | 3.841        |
| 6G9B   | A_ARG_130 | NH2    | A_ASP_163 | OD1    | 3.043        |
| 6G9B   | A_LYS_140 | NZ     | A_GLU_112 | OE2    | 3.639        |
| 6G9B   | A_HIS_154 | NE2    | A_GLU_178 | OE1    | 2.960        |
| 6G9B   | A_ARG_164 | NH1    | A_ASP_163 | OD1    | 2.869        |
| 6G9B   | A_ARG_164 | NH1    | A_ASP_163 | OD2    | 3.373        |
| 6G9B   | A_ARG_172 | NH1    | A_GLU_120 | OE2    | 3.934        |
| 6G9B   | A_ARG_247 | NH2    | A_GLU_245 | OE1    | 3.502        |
| 6G9B   | A_ARG_266 | NH2    | A_ASP_237 | OD2    | 3.075        |
| 6G9B   | B_LYS_510 | NZ     | A_GLU_292 | OE1    | 3.414        |
| 6G9B   | B_HIS_516 | NE2    | B_GLU_545 | OE1    | 2.666        |
| 6G9B   | B_ARG_559 | NH1    | A_GLU_103 | OE1    | 2.574        |
| 6G9B   | B_ARG_559 | NH1    | A_GLU_103 | OE2    | 3.760        |
| 6G9B   | B_ARG_559 | NH2    | A_GLU_103 | OE1    | 3.199        |
| 6G9B   | B_ARG_559 | NH2    | A_GLU_103 | OE2    | 2.870        |
| 6G9B   | B_LYS_588 | NZ     | A_ASP_47  | OD1    | 3.317        |
| 6G9B   | B_LYS_588 | NZ     | A_ASP_47  | OD2    | 2.892        |
| 6G9B   | B_LYS_617 | NZ     | B_ASP_614 | OD2    | 3.817        |
| 6G9B   | B_HIS_628 | NE2    | B_ASP_629 | OD1    | 3.701        |
| 6G9B   | B_HIS_628 | NE2    | B_ASP_629 | OD2    | 3.971        |

Table 31: 6G9B-specific salt bridging network analysis. In this table, the residue naming scheme is **Chain ID\_residue name\_residue number**

| PDB ID | Residue A | Atom A | Residue B | Atom B | Distance (Å) |
|--------|-----------|--------|-----------|--------|--------------|
| 6G9I   | A_HIS_39  | NE2    | A_ASP_55  | OD1    | 3.027        |
| 6G9I   | A_HIS_39  | NE2    | A_ASP_55  | OD2    | 2.861        |
| 6G9I   | A_ARG_85  | NH1    | A_GLU_178 | OE1    | 3.616        |
| 6G9I   | A_ARG_85  | NH1    | A_GLU_178 | OE2    | 2.527        |
| 6G9I   | A_LYS_114 | NZ     | A_GLU_120 | OE2    | 3.647        |
| 6G9I   | A_ARG_130 | NH2    | A_ASP_163 | OD1    | 3.039        |
| 6G9I   | A_HIS_154 | NE2    | A_GLU_178 | OE1    | 2.656        |
| 6G9I   | A_ARG_164 | NH1    | A_ASP_163 | OD1    | 3.026        |
| 6G9I   | A_ARG_164 | NH1    | A_ASP_163 | OD2    | 3.451        |
| 6G9I   | A_ARG_266 | NH2    | A_ASP_237 | OD2    | 3.464        |
| 6G9I   | B_HIS_516 | NE2    | B_GLU_545 | OE1    | 2.739        |
| 6G9I   | B_ARG_559 | NH1    | A_GLU_103 | OE1    | 2.689        |
| 6G9I   | B_ARG_559 | NH1    | A_GLU_103 | OE2    | 3.794        |
| 6G9I   | B_ARG_559 | NH2    | A_GLU_103 | OE1    | 3.340        |
| 6G9I   | B_ARG_559 | NH2    | A_GLU_103 | OE2    | 2.940        |
| 6G9I   | B_LYS_622 | NZ     | B_ASP_621 | OD1    | 2.501        |
| 6G9I   | B_LYS_622 | NZ     | B_ASP_621 | OD2    | 3.672        |

Table 32: 6G9I-specific salt bridging network analysis. In this table, the residue naming scheme is **Chain ID\_residue name\_residue number**

| PDB ID | Residue A | Atom A | Residue B | Atom B | Distance (Å) |
|--------|-----------|--------|-----------|--------|--------------|
| 6HRO   | A_ARG_85  | NH1    | A_GLU_178 | OE1    | 3.459        |
| 6HRO   | A_ARG_85  | NH1    | A_GLU_178 | OE2    | 2.606        |
| 6HRO   | A_LYS_114 | NZ     | A_GLU_120 | OE2    | 3.759        |
| 6HRO   | A_ARG_130 | NH2    | A_ASP_163 | OD1    | 2.957        |
| 6HRO   | A_HIS_154 | NE2    | A_GLU_178 | OE1    | 3.012        |
| 6HRO   | A_ARG_164 | NH1    | A_ASP_163 | OD1    | 3.206        |
| 6HRO   | A_ARG_164 | NH1    | A_ASP_163 | OD2    | 3.548        |
| 6HRO   | A_ARG_266 | NH2    | A_ASP_237 | OD2    | 3.585        |
| 6HRO   | B_LYS_510 | NZ     | A_GLU_292 | OE1    | 3.852        |
| 6HRO   | B_HIS_516 | NE2    | B_GLU_545 | OE1    | 2.827        |
| 6HRO   | B_ARG_559 | NH1    | A_GLU_103 | OE1    | 2.817        |
| 6HRO   | B_ARG_559 | NH1    | A_GLU_103 | OE2    | 3.911        |
| 6HRO   | B_ARG_559 | NH2    | A_GLU_103 | OE1    | 3.514        |
| 6HRO   | B_ARG_559 | NH2    | A_GLU_103 | OE2    | 3.164        |
| 6HRO   | B_LYS_588 | NZ     | A_ASP_47  | OD1    | 3.207        |
| 6HRO   | B_LYS_588 | NZ     | A_ASP_47  | OD2    | 2.778        |

Table 33: 6HRO-specific salt bridging network analysis. In this table, the residue naming scheme is **Chain ID\_residue name\_residue number**

| PDB ID | Residue A | Atom A | Residue B | Atom B | Distance (Å) |
|--------|-----------|--------|-----------|--------|--------------|
| 6HS4   | A_HIS_39  | NE2    | A_ASP_55  | OD1    | 3.180        |
| 6HS4   | A_HIS_39  | NE2    | A_ASP_55  | OD2    | 2.847        |
| 6HS4   | A_ARG_85  | NH1    | A_GLU_178 | OE1    | 3.429        |
| 6HS4   | A_ARG_85  | NH1    | A_GLU_178 | OE2    | 2.535        |
| 6HS4   | A_LYS_114 | NZ     | A_GLU_120 | OE2    | 3.578        |
| 6HS4   | A_ARG_130 | NH2    | A_ASP_163 | OD1    | 3.064        |
| 6HS4   | A_HIS_154 | NE2    | A_GLU_178 | OE1    | 2.801        |
| 6HS4   | A_ARG_164 | NH1    | A_ASP_163 | OD1    | 3.114        |
| 6HS4   | A_ARG_164 | NH1    | A_ASP_163 | OD2    | 3.585        |
| 6HS4   | A_ARG_266 | NH2    | A_ASP_237 | OD2    | 3.211        |
| 6HS4   | B_HIS_516 | NE2    | B_GLU_545 | OE1    | 2.734        |
| 6HS4   | B_ARG_559 | NH1    | A_GLU_103 | OE1    | 2.624        |
| 6HS4   | B_ARG_559 | NH1    | A_GLU_103 | OE2    | 3.811        |
| 6HS4   | B_ARG_559 | NH2    | A_GLU_103 | OE1    | 3.176        |
| 6HS4   | B_ARG_559 | NH2    | A_GLU_103 | OE2    | 2.846        |
| 6HS4   | B_LYS_588 | NZ     | A_ASP_47  | OD1    | 3.053        |
| 6HS4   | B_LYS_588 | NZ     | A_ASP_47  | OD2    | 2.954        |

Table 34: 6HS4-specific salt bridging network analysis. In this table, the residue naming scheme is **Chain ID\_residue name\_residue number**

| PDB ID | Residue A | Atom A | Residue B | Atom B | Distance (Å) |
|--------|-----------|--------|-----------|--------|--------------|
| 6MAM   | A_ARG_38  | NH1    | A_ASP_92  | OD1    | 3.032        |
| 6MAM   | A_ARG_38  | NH2    | A_GLU_46  | OE1    | 3.455        |
| 6MAM   | A_ARG_38  | NH2    | A_GLU_46  | OE2    | 3.429        |
| 6MAM   | A_ARG_50  | NH1    | A_ASP_61  | OD2    | 2.812        |
| 6MAM   | A_ARG_50  | NH2    | A_GLU_116 | OE2    | 2.918        |
| 6MAM   | A_ARG_69  | NH1    | A_ASP_92  | OD2    | 2.800        |
| 6MAM   | A_ARG_69  | NH2    | A_ASP_92  | OD1    | 3.038        |
| 6MAM   | A_ARG_69  | NH2    | A_ASP_92  | OD2    | 2.756        |
| 6MAM   | A_ARG_74  | NH2    | A_ASP_76  | OD1    | 3.398        |
| 6MAM   | A_LYS_78  | NZ     | A_ASP_75  | OD2    | 3.612        |
| 6MAM   | A_ARG_106 | NH1    | A_ASP_56  | OD2    | 3.214        |
| 6MAM   | A_ARG_106 | NH2    | A_ASP_56  | OD1    | 3.431        |
| 6MAM   | A_ARG_106 | NH2    | A_ASP_56  | OD2    | 2.235        |
| 6MAM   | A_LYS_161 | NZ     | A_ASP_162 | OD1    | 2.861        |
| 6MAM   | A_LYS_227 | NZ     | B_GLU_125 | OE1    | 3.431        |
| 6MAM   | A_LYS_228 | NZ     | A_GLU_230 | OE1    | 2.933        |
| 6MAM   | A_LYS_228 | NZ     | A_GLU_230 | OE2    | 2.500        |
| 6MAM   | B_ARG_3   | NH1    | B_ASP_1   | OD1    | 3.296        |
| 6MAM   | B_ARG_3   | NH2    | B_ASP_1   | OD1    | 3.656        |
| 6MAM   | B_ARG_24  | NH2    | B_ASP_70  | OD1    | 3.387        |
| 6MAM   | B_ARG_24  | NH2    | B_ASP_70  | OD2    | 3.517        |
| 6MAM   | B_ARG_61  | NH2    | B_GLU_81  | OE2    | 3.262        |
| 6MAM   | B_ARG_61  | NH2    | B_ASP_82  | OD1    | 3.695        |
| 6MAM   | B_LYS_105 | NZ     | B_GLU_167 | OE1    | 2.898        |
| 6MAM   | B_LYS_105 | NZ     | B_GLU_167 | OE2    | 3.314        |
| 6MAM   | B_LYS_151 | NZ     | B_GLU_197 | OE1    | 2.860        |
| 6MAM   | C_ARG_38  | NH1    | C_ASP_92  | OD1    | 2.663        |
| 6MAM   | C_ARG_38  | NH2    | C_GLU_46  | OE1    | 3.453        |
| 6MAM   | C_ARG_38  | NH2    | C_GLU_46  | OE2    | 3.332        |
| 6MAM   | C_ARG_38  | NH2    | C_ASP_92  | OD1    | 3.874        |
| 6MAM   | C_ARG_50  | NH1    | C_ASP_61  | OD2    | 3.061        |
| 6MAM   | C_ARG_69  | NH1    | C_ASP_92  | OD2    | 2.947        |
| 6MAM   | C_ARG_69  | NH2    | C_ASP_92  | OD1    | 3.364        |
| 6MAM   | C_ARG_69  | NH2    | C_ASP_92  | OD2    | 2.722        |
| 6MAM   | C_ARG_74  | NH2    | C_ASP_76  | OD1    | 3.320        |
| 6MAM   | C_LYS_78  | NZ     | C_ASP_75  | OD2    | 3.377        |
| 6MAM   | C_LYS_89  | NZ     | C_GLU_91  | OE2    | 3.915        |
| 6MAM   | C_ARG_106 | NH2    | C_ASP_56  | OD1    | 3.976        |
| 6MAM   | C_ARG_106 | NH2    | C_ASP_56  | OD2    | 2.463        |
| 6MAM   | C_LYS_161 | NZ     | C_ASP_162 | OD1    | 2.840        |
| 6MAM   | C_LYS_161 | NZ     | C_ASP_162 | OD2    | 3.813        |
| 6MAM   | C_HIS_182 | NE2    | D_ASP_169 | OD2    | 3.087        |
| 6MAM   | C_LYS_227 | NZ     | D_GLU_125 | OE1    | 3.951        |
| 6MAM   | D_ARG_3   | NH1    | D_ASP_1   | OD1    | 3.278        |
| 6MAM   | D_ARG_3   | NH1    | D_ASP_1   | OD2    | 3.738        |
| 6MAM   | D_ARG_3   | NH2    | D_ASP_1   | OD1    | 2.805        |
| 6MAM   | D_ARG_3   | NH2    | D_ASP_1   | OD2    | 3.711        |
| 6MAM   | D_ARG_61  | NH2    | D_GLU_81  | OE2    | 3.528        |
| 6MAM   | D_ARG_61  | NH2    | D_ASP_82  | OD1    | 2.930        |
| 6MAM   | D_ARG_61  | NH2    | D_ASP_82  | OD2    | 3.239        |
| 6MAM   | D_LYS_105 | NZ     | D_GLU_167 | OE1    | 2.533        |
| 6MAM   | D_LYS_105 | NZ     | D_GLU_167 | OE2    | 3.413        |
| 6MAM   | D_LYS_151 | NZ     | D_GLU_197 | OE1    | 2.852        |
| 6MAM   | D_HIS_191 | ND1    | D_ASP_153 | OD2    | 2.884        |
| 6MAM   | E_ARG_38  | NH1    | E_ASP_92  | OD1    | 2.865        |
| 6MAM   | E_ARG_38  | NH2    | E_GLU_46  | OE1    | 3.478        |
| 6MAM   | E_ARG_38  | NH2    | E_GLU_46  | OE2    | 3.114        |

|      |           |     |           |     |       |
|------|-----------|-----|-----------|-----|-------|
| 6MAM | E_ARG_38  | NH2 | E_ASP_92  | OD1 | 3.571 |
| 6MAM | E_ARG_50  | NH2 | E_ASP_61  | OD2 | 2.222 |
| 6MAM | E_ARG_69  | NH1 | E_ASP_92  | OD2 | 3.919 |
| 6MAM | E_ARG_74  | NH2 | E_ASP_76  | OD1 | 3.361 |
| 6MAM | E_LYS_78  | NZ  | E_ASP_75  | OD2 | 3.911 |
| 6MAM | E_ARG_106 | NH1 | E_ASP_56  | OD1 | 3.912 |
| 6MAM | E_ARG_106 | NH1 | E_ASP_56  | OD2 | 2.681 |
| 6MAM | E_ARG_106 | NH2 | E_ASP_56  | OD2 | 2.658 |
| 6MAM | E_LYS_161 | NZ  | E_ASP_162 | OD1 | 2.972 |
| 6MAM | F_ARG_24  | NH2 | F_ASP_70  | OD1 | 3.490 |
| 6MAM | F_ARG_24  | NH2 | F_ASP_70  | OD2 | 3.587 |
| 6MAM | F_ARG_61  | NH2 | F_GLU_81  | OE2 | 3.395 |
| 6MAM | F_ARG_61  | NH2 | F_ASP_82  | OD1 | 2.777 |
| 6MAM | F_ARG_61  | NH2 | F_ASP_82  | OD2 | 3.559 |
| 6MAM | F_LYS_105 | NZ  | F_GLU_167 | OE1 | 3.155 |
| 6MAM | F_LYS_105 | NZ  | F_GLU_167 | OE2 | 3.321 |
| 6MAM | F_LYS_128 | NZ  | F_GLU_125 | OE1 | 3.556 |
| 6MAM | F_LYS_128 | NZ  | F_GLU_125 | OE2 | 3.637 |
| 6MAM | F_LYS_151 | NZ  | F_GLU_197 | OE1 | 2.889 |
| 6MAM | F_LYS_190 | NZ  | F_ASP_187 | OD1 | 3.330 |
| 6MAM | G_ARG_85  | NH1 | G_GLU_178 | OE1 | 3.649 |
| 6MAM | G_ARG_85  | NH1 | G_GLU_178 | OE2 | 2.952 |
| 6MAM | G_LYS_114 | NZ  | G_GLU_120 | OE2 | 3.654 |
| 6MAM | G_ARG_130 | NH2 | G_ASP_163 | OD2 | 3.414 |
| 6MAM | G_HIS_154 | NE2 | G_GLU_178 | OE1 | 2.787 |
| 6MAM | G_ARG_164 | NH1 | G_ASP_163 | OD1 | 2.973 |
| 6MAM | G_ARG_164 | NH1 | G_ASP_163 | OD2 | 3.775 |
| 6MAM | G_ARG_164 | NH2 | G_ASP_163 | OD1 | 3.075 |
| 6MAM | G_ARG_164 | NH2 | G_ASP_163 | OD2 | 2.437 |
| 6MAM | G_ARG_172 | NH1 | G_GLU_120 | OE2 | 3.996 |
| 6MAM | H_HIS_516 | NE2 | H_GLU_545 | OE1 | 2.716 |
| 6MAM | H_ARG_559 | NH1 | G_GLU_103 | OE1 | 2.237 |
| 6MAM | H_ARG_559 | NH1 | G_GLU_103 | OE2 | 3.123 |
| 6MAM | H_ARG_559 | NH2 | G_GLU_103 | OE1 | 3.565 |
| 6MAM | H_ARG_559 | NH2 | G_GLU_103 | OE2 | 2.826 |
| 6MAM | I_ARG_85  | NH1 | I_GLU_178 | OE1 | 3.469 |
| 6MAM | I_ARG_85  | NH1 | I_GLU_178 | OE2 | 2.648 |
| 6MAM | I_LYS_114 | NZ  | I_GLU_120 | OE1 | 3.810 |
| 6MAM | I_LYS_114 | NZ  | I_GLU_120 | OE2 | 3.218 |
| 6MAM | I_ARG_130 | NH2 | I_ASP_163 | OD2 | 3.267 |
| 6MAM | I_HIS_154 | NE2 | I_GLU_178 | OE1 | 2.764 |
| 6MAM | I_ARG_164 | NH1 | I_ASP_163 | OD1 | 3.601 |
| 6MAM | I_ARG_164 | NH1 | I_ASP_163 | OD2 | 2.921 |
| 6MAM | I_ARG_172 | NH1 | I_GLU_120 | OE2 | 3.984 |
| 6MAM | J_HIS_516 | NE2 | J_GLU_545 | OE1 | 2.735 |
| 6MAM | J_ARG_559 | NH1 | I_GLU_103 | OE1 | 2.281 |
| 6MAM | J_ARG_559 | NH1 | I_GLU_103 | OE2 | 3.223 |
| 6MAM | J_ARG_559 | NH2 | I_GLU_103 | OE1 | 3.504 |
| 6MAM | J_ARG_559 | NH2 | I_GLU_103 | OE2 | 2.826 |
| 6MAM | K_ARG_85  | NH1 | K_GLU_178 | OE1 | 3.549 |
| 6MAM | K_ARG_85  | NH1 | K_GLU_178 | OE2 | 2.788 |
| 6MAM | K_LYS_114 | NZ  | K_GLU_120 | OE1 | 3.898 |
| 6MAM | K_LYS_114 | NZ  | K_GLU_120 | OE2 | 3.320 |
| 6MAM | K_ARG_130 | NH2 | K_ASP_163 | OD2 | 3.275 |
| 6MAM | K_HIS_154 | NE2 | K_GLU_178 | OE1 | 3.032 |
| 6MAM | K_ARG_164 | NH1 | K_ASP_163 | OD1 | 3.574 |
| 6MAM | K_ARG_164 | NH1 | K_ASP_163 | OD2 | 2.908 |
| 6MAM | K_ARG_172 | NH1 | K_GLU_120 | OE2 | 3.957 |

|      |           |     |           |     |       |
|------|-----------|-----|-----------|-----|-------|
| 6MAM | L_HIS_516 | NE2 | L_GLU_545 | OE1 | 2.681 |
| 6MAM | L_ARG_559 | NH1 | K_GLU_103 | OE1 | 2.658 |
| 6MAM | L_ARG_559 | NH1 | K_GLU_103 | OE2 | 3.420 |
| 6MAM | L_ARG_559 | NH2 | K_GLU_103 | OE1 | 3.722 |
| 6MAM | L_ARG_559 | NH2 | K_GLU_103 | OE2 | 2.995 |

Table 35: 6MAM-specific salt bridging network analysis. In this table, the residue naming scheme is **Chain ID\_residue name\_residue number**

| PDB ID | Residue A | Atom A | Residue B | Atom B | Distance (Å) |
|--------|-----------|--------|-----------|--------|--------------|
| 6NAE   | A_HIS_39  | NE2    | A_ASP_55  | OD1    | 2.745        |
| 6NAE   | A_HIS_39  | NE2    | A_ASP_55  | OD2    | 3.133        |
| 6NAE   | A_ARG_85  | NH1    | A_GLU_178 | OE1    | 3.501        |
| 6NAE   | A_ARG_85  | NH1    | A_GLU_178 | OE2    | 2.362        |
| 6NAE   | A_ARG_130 | NH2    | A_ASP_163 | OD2    | 3.231        |
| 6NAE   | A_HIS_154 | NE2    | A_GLU_178 | OE1    | 2.851        |
| 6NAE   | A_ARG_164 | NH1    | A_ASP_163 | OD1    | 3.478        |
| 6NAE   | A_ARG_164 | NH1    | A_ASP_163 | OD2    | 2.808        |
| 6NAE   | A_ARG_172 | NH1    | A_GLU_120 | OE2    | 3.850        |
| 6NAE   | A_ARG_266 | NH2    | A_ASP_237 | OD2    | 3.596        |
| 6NAE   | B_LYS_510 | NZ     | A_GLU_292 | OE1    | 2.350        |
| 6NAE   | B_LYS_510 | NZ     | A_GLU_292 | OE2    | 3.768        |
| 6NAE   | B_HIS_516 | NE2    | B_GLU_545 | OE1    | 2.507        |
| 6NAE   | B_ARG_559 | NH1    | A_GLU_103 | OE1    | 2.669        |
| 6NAE   | B_ARG_559 | NH1    | A_GLU_103 | OE2    | 3.739        |
| 6NAE   | B_ARG_559 | NH2    | A_GLU_103 | OE1    | 3.488        |
| 6NAE   | B_ARG_559 | NH2    | A_GLU_103 | OE2    | 3.068        |

Table 36: 6NAE-specific salt bridging network analysis. In this table, the residue naming scheme is **Chain ID\_residue name\_residue number**

| PDB ID | Residue A | Atom A | Residue B | Atom B | Distance (Å) |
|--------|-----------|--------|-----------|--------|--------------|
| 6QD7   | L_ARG_45  | NH1    | L_GLU_81  | OE2    | 3.933        |
| 6QD7   | L_ARG_61  | NH1    | L_GLU_79  | OE1    | 3.350        |
| 6QD7   | L_ARG_61  | NH1    | L_GLU_79  | OE2    | 2.563        |
| 6QD7   | L_ARG_61  | NH2    | L_GLU_79  | OE1    | 3.628        |
| 6QD7   | L_ARG_61  | NH2    | L_GLU_79  | OE2    | 3.965        |
| 6QD7   | L_ARG_61  | NH2    | L_GLU_81  | OE1    | 3.504        |
| 6QD7   | L_ARG_91  | NH1    | D_GLU_502 | OE1    | 3.607        |
| 6QD7   | L_ARG_91  | NH2    | L_GLU_50  | OE1    | 3.410        |
| 6QD7   | H_ARG_38  | NH1    | H_ASP_87  | OD1    | 2.843        |
| 6QD7   | H_LYS_65  | NZ     | D_ASP_552 | OD1    | 3.151        |
| 6QD7   | H_LYS_65  | NZ     | D_ASP_552 | OD2    | 3.487        |
| 6QD7   | H_ARG_67  | NH1    | H_ASP_87  | OD1    | 3.877        |
| 6QD7   | H_ARG_67  | NH1    | H_ASP_87  | OD2    | 2.749        |
| 6QD7   | H_ARG_67  | NH2    | H_ASP_87  | OD1    | 3.605        |
| 6QD7   | H_ARG_67  | NH2    | H_ASP_87  | OD2    | 3.759        |
| 6QD7   | H_LYS_95  | NZ     | H_ASP_106 | OD1    | 2.959        |
| 6QD7   | H_LYS_95  | NZ     | H_ASP_106 | OD2    | 3.089        |
| 6QD7   | H_ARG_101 | NH1    | D_GLU_564 | OE1    | 3.838        |
| 6QD7   | H_ARG_101 | NH1    | D_GLU_564 | OE2    | 2.869        |
| 6QD7   | H_ARG_101 | NH2    | D_GLU_502 | OE1    | 3.497        |
| 6QD7   | H_ARG_101 | NH2    | D_GLU_502 | OE2    | 3.635        |
| 6QD7   | H_ARG_101 | NH2    | D_GLU_564 | OE1    | 3.061        |
| 6QD7   | H_ARG_101 | NH2    | D_GLU_564 | OE2    | 3.438        |
| 6QD7   | A_ARG_64  | NH2    | A_ASP_192 | OD1    | 3.858        |
| 6QD7   | A_ARG_85  | NH1    | A_GLU_178 | OE1    | 3.413        |
| 6QD7   | A_ARG_85  | NH1    | A_GLU_178 | OE2    | 3.024        |
| 6QD7   | A_LYS_114 | NZ     | A_GLU_120 | OE1    | 3.280        |
| 6QD7   | A_ARG_130 | NH2    | A_ASP_163 | OD1    | 3.286        |
| 6QD7   | A_ARG_134 | NH1    | B_GLU_545 | OE2    | 3.138        |
| 6QD7   | A_HIS_154 | ND1    | A_GLU_156 | OE1    | 3.400        |
| 6QD7   | A_HIS_154 | NE2    | A_GLU_178 | OE1    | 2.937        |
| 6QD7   | A_ARG_164 | NH1    | A_ASP_163 | OD1    | 3.712        |
| 6QD7   | A_ARG_164 | NH1    | A_ASP_163 | OD2    | 3.939        |
| 6QD7   | B_ARG_559 | NH1    | A_GLU_103 | OE1    | 2.604        |
| 6QD7   | B_ARG_559 | NH1    | A_GLU_103 | OE2    | 3.895        |
| 6QD7   | B_ARG_559 | NH2    | A_GLU_103 | OE1    | 3.220        |
| 6QD7   | B_ARG_559 | NH2    | A_GLU_103 | OE2    | 3.089        |
| 6QD7   | B_ARG_587 | NH2    | B_GLU_578 | OE2    | 3.922        |
| 6QD7   | B_LYS_588 | NZ     | A_ASP_47  | OD2    | 3.517        |
| 6QD7   | B_HIS_602 | ND1    | F_GLU_611 | OE2    | 2.318        |
| 6QD7   | B_HIS_628 | ND1    | B_ASP_624 | OD1    | 3.831        |
| 6QD7   | B_HIS_628 | NE2    | B_ASP_624 | OD1    | 2.455        |
| 6QD7   | C_ARG_64  | NH2    | C_ASP_192 | OD1    | 3.858        |
| 6QD7   | C_ARG_85  | NH1    | C_GLU_178 | OE1    | 3.413        |
| 6QD7   | C_ARG_85  | NH1    | C_GLU_178 | OE2    | 3.024        |
| 6QD7   | C_LYS_114 | NZ     | C_GLU_120 | OE1    | 3.281        |
| 6QD7   | C_ARG_130 | NH2    | C_ASP_163 | OD1    | 3.286        |
| 6QD7   | C_ARG_134 | NH1    | D_GLU_545 | OE2    | 3.066        |
| 6QD7   | C_HIS_154 | ND1    | C_GLU_156 | OE1    | 3.400        |
| 6QD7   | C_HIS_154 | NE2    | C_GLU_178 | OE1    | 2.937        |
| 6QD7   | C_ARG_164 | NH1    | C_ASP_163 | OD1    | 3.711        |
| 6QD7   | C_ARG_164 | NH1    | C_ASP_163 | OD2    | 3.938        |
| 6QD7   | E_ARG_64  | NH2    | E_ASP_192 | OD1    | 3.857        |
| 6QD7   | E_ARG_85  | NH1    | E_GLU_178 | OE1    | 3.413        |
| 6QD7   | E_ARG_85  | NH1    | E_GLU_178 | OE2    | 3.024        |
| 6QD7   | E_LYS_114 | NZ     | E_GLU_120 | OE1    | 3.279        |
| 6QD7   | E_ARG_130 | NH2    | E_ASP_163 | OD1    | 3.285        |

|      |           |     |           |     |       |
|------|-----------|-----|-----------|-----|-------|
| 6QD7 | E_ARG_134 | NH1 | F_GLU_545 | OE2 | 2.931 |
| 6QD7 | E_HIS_154 | ND1 | E_GLU_156 | OE1 | 3.400 |
| 6QD7 | E_HIS_154 | NE2 | E_GLU_178 | OE1 | 2.937 |
| 6QD7 | E_ARG_164 | NH1 | E_ASP_163 | OD1 | 3.712 |
| 6QD7 | E_ARG_164 | NH1 | E_ASP_163 | OD2 | 3.939 |
| 6QD7 | D_ARG_559 | NH1 | C_GLU_103 | OE1 | 2.624 |
| 6QD7 | D_ARG_559 | NH1 | C_GLU_103 | OE2 | 3.858 |
| 6QD7 | D_ARG_559 | NH2 | C_GLU_103 | OE1 | 3.320 |
| 6QD7 | D_ARG_559 | NH2 | C_GLU_103 | OE2 | 3.132 |
| 6QD7 | D_ARG_587 | NH2 | D_GLU_578 | OE2 | 3.922 |
| 6QD7 | D_LYS_588 | NZ  | C_ASP_47  | OD2 | 3.598 |
| 6QD7 | D_HIS_602 | ND1 | B_GLU_611 | OE2 | 2.828 |
| 6QD7 | D_HIS_628 | ND1 | D_ASP_624 | OD1 | 3.831 |
| 6QD7 | D_HIS_628 | NE2 | D_ASP_624 | OD1 | 2.456 |
| 6QD7 | F_ARG_559 | NH1 | E_GLU_103 | OE1 | 2.462 |
| 6QD7 | F_ARG_559 | NH1 | E_GLU_103 | OE2 | 3.800 |
| 6QD7 | F_ARG_559 | NH2 | E_GLU_103 | OE1 | 3.090 |
| 6QD7 | F_ARG_559 | NH2 | E_GLU_103 | OE2 | 2.951 |
| 6QD7 | F_ARG_587 | NH2 | F_GLU_578 | OE2 | 3.922 |
| 6QD7 | F_LYS_588 | NZ  | E_ASP_47  | OD2 | 3.686 |
| 6QD7 | F_HIS_602 | ND1 | D_GLU_611 | OE2 | 2.771 |
| 6QD7 | F_HIS_628 | ND1 | F_ASP_624 | OD1 | 3.831 |
| 6QD7 | F_HIS_628 | NE2 | F_ASP_624 | OD1 | 2.455 |
| 6QD7 | X_ARG_38  | NH1 | X_ASP_87  | OD1 | 2.843 |
| 6QD7 | X_LYS_65  | NZ  | F_ASP_552 | OD1 | 3.082 |
| 6QD7 | X_LYS_65  | NZ  | F_ASP_552 | OD2 | 3.701 |
| 6QD7 | X_ARG_67  | NH1 | X_ASP_87  | OD1 | 3.876 |
| 6QD7 | X_ARG_67  | NH1 | X_ASP_87  | OD2 | 2.748 |
| 6QD7 | X_ARG_67  | NH2 | X_ASP_87  | OD1 | 3.604 |
| 6QD7 | X_ARG_67  | NH2 | X_ASP_87  | OD2 | 3.759 |
| 6QD7 | X_LYS_95  | NZ  | X_ASP_106 | OD1 | 2.959 |
| 6QD7 | X_LYS_95  | NZ  | X_ASP_106 | OD2 | 3.089 |
| 6QD7 | X_ARG_101 | NH1 | F_GLU_564 | OE1 | 3.893 |
| 6QD7 | X_ARG_101 | NH1 | F_GLU_564 | OE2 | 2.816 |
| 6QD7 | X_ARG_101 | NH2 | F_GLU_502 | OE1 | 3.631 |
| 6QD7 | X_ARG_101 | NH2 | F_GLU_502 | OE2 | 3.812 |
| 6QD7 | X_ARG_101 | NH2 | F_GLU_564 | OE1 | 3.108 |
| 6QD7 | X_ARG_101 | NH2 | F_GLU_564 | OE2 | 3.371 |
| 6QD7 | U_ARG_38  | NH1 | U_ASP_87  | OD1 | 2.842 |
| 6QD7 | U_LYS_65  | NZ  | B_ASP_552 | OD1 | 2.927 |
| 6QD7 | U_LYS_65  | NZ  | B_ASP_552 | OD2 | 3.579 |
| 6QD7 | U_ARG_67  | NH1 | U_ASP_87  | OD1 | 3.877 |
| 6QD7 | U_ARG_67  | NH1 | U_ASP_87  | OD2 | 2.749 |
| 6QD7 | U_ARG_67  | NH2 | U_ASP_87  | OD1 | 3.604 |
| 6QD7 | U_ARG_67  | NH2 | U_ASP_87  | OD2 | 3.760 |
| 6QD7 | U_LYS_95  | NZ  | U_ASP_106 | OD1 | 2.959 |
| 6QD7 | U_LYS_95  | NZ  | U_ASP_106 | OD2 | 3.089 |
| 6QD7 | U_ARG_101 | NH1 | B_GLU_564 | OE1 | 3.771 |
| 6QD7 | U_ARG_101 | NH1 | B_GLU_564 | OE2 | 2.902 |
| 6QD7 | U_ARG_101 | NH2 | B_GLU_502 | OE1 | 3.404 |
| 6QD7 | U_ARG_101 | NH2 | B_GLU_502 | OE2 | 3.473 |
| 6QD7 | U_ARG_101 | NH2 | B_GLU_564 | OE1 | 3.146 |
| 6QD7 | U_ARG_101 | NH2 | B_GLU_564 | OE2 | 3.609 |
| 6QD7 | Z_ARG_45  | NH1 | Z_GLU_81  | OE2 | 3.706 |
| 6QD7 | Z_ARG_45  | NH2 | Z_GLU_81  | OE2 | 3.775 |
| 6QD7 | Z_ARG_61  | NH1 | Z_GLU_79  | OE1 | 3.427 |
| 6QD7 | Z_ARG_61  | NH1 | Z_GLU_79  | OE2 | 2.720 |
| 6QD7 | Z_ARG_61  | NH2 | Z_GLU_79  | OE1 | 3.521 |

|      |          |     |           |     |       |
|------|----------|-----|-----------|-----|-------|
| 6QD7 | Z_ARG_61 | NH2 | Z_GLU_81  | OE1 | 3.408 |
| 6QD7 | Z_ARG_61 | NH2 | Z_ASP_82  | OD1 | 3.494 |
| 6QD7 | Z_ARG_61 | NH2 | Z_ASP_82  | OD2 | 2.754 |
| 6QD7 | Z_ARG_91 | NH1 | F_GLU_502 | OE1 | 3.548 |
| 6QD7 | Z_ARG_91 | NH2 | Z_GLU_50  | OE1 | 3.368 |
| 6QD7 | P_ARG_45 | NH1 | P_GLU_81  | OE2 | 3.704 |
| 6QD7 | P_ARG_45 | NH2 | P_GLU_81  | OE2 | 3.711 |
| 6QD7 | P_ARG_61 | NH1 | P_GLU_79  | OE1 | 3.312 |
| 6QD7 | P_ARG_61 | NH1 | P_GLU_79  | OE2 | 2.568 |
| 6QD7 | P_ARG_61 | NH2 | P_GLU_79  | OE1 | 3.625 |
| 6QD7 | P_ARG_61 | NH2 | P_GLU_79  | OE2 | 3.928 |
| 6QD7 | P_ARG_61 | NH2 | P_GLU_81  | OE1 | 3.239 |
| 6QD7 | P_ARG_61 | NH2 | P_ASP_82  | OD1 | 2.611 |
| 6QD7 | P_ARG_61 | NH2 | P_ASP_82  | OD2 | 3.516 |
| 6QD7 | P_ARG_91 | NH1 | B_GLU_502 | OE1 | 3.467 |
| 6QD7 | P_ARG_91 | NH2 | P_GLU_50  | OE1 | 3.343 |

Table 37: 6QD7-specific salt bridging network analysis. In this table, the residue naming scheme is **Chain ID\_residue name\_residue number**

| PDB ID | Residue A | Atom A | Residue B | Atom B | Distance (Å) |
|--------|-----------|--------|-----------|--------|--------------|
| 6QD8   | Z_LYS_39  | NZ     | Z_GLU_81  | OE2    | 3.248        |
| 6QD8   | Z_ARG_61  | NH2    | Z_ASP_82  | OD1    | 2.630        |
| 6QD8   | Z_ARG_61  | NH2    | Z_ASP_82  | OD2    | 3.110        |
| 6QD8   | Z_ARG_96  | NH1    | W_GLU_51  | OE1    | 3.187        |
| 6QD8   | Z_ARG_96  | NH1    | W_GLU_51  | OE2    | 3.722        |
| 6QD8   | A_ARG_64  | NH2    | B_ASP_522 | OD2    | 3.626        |
| 6QD8   | A_ARG_85  | NH1    | A_GLU_178 | OE1    | 3.877        |
| 6QD8   | A_ARG_85  | NH1    | A_GLU_178 | OE2    | 3.145        |
| 6QD8   | A_LYS_114 | NZ     | A_GLU_112 | OE2    | 2.626        |
| 6QD8   | A_LYS_114 | NZ     | A_GLU_120 | OE2    | 3.220        |
| 6QD8   | A_ARG_130 | NH2    | A_ASP_163 | OD1    | 3.061        |
| 6QD8   | A_ARG_134 | NH1    | B_GLU_545 | OE2    | 3.117        |
| 6QD8   | A_HIS_154 | NE2    | A_GLU_178 | OE1    | 2.431        |
| 6QD8   | A_ARG_266 | NH2    | A_ASP_237 | OD2    | 3.394        |
| 6QD8   | Y_LYS_39  | NZ     | Y_GLU_81  | OE2    | 3.248        |
| 6QD8   | Y_ARG_61  | NH2    | Y_ASP_82  | OD1    | 2.630        |
| 6QD8   | Y_ARG_61  | NH2    | Y_ASP_82  | OD2    | 3.109        |
| 6QD8   | Y_ARG_96  | NH1    | Q_GLU_51  | OE1    | 3.080        |
| 6QD8   | Y_ARG_96  | NH1    | Q_GLU_51  | OE2    | 3.529        |
| 6QD8   | B_ARG_559 | NH1    | A_GLU_103 | OE1    | 3.695        |
| 6QD8   | B_ARG_559 | NH1    | A_GLU_103 | OE2    | 2.598        |
| 6QD8   | B_ARG_559 | NH2    | A_GLU_103 | OE1    | 3.315        |
| 6QD8   | B_ARG_559 | NH2    | A_GLU_103 | OE2    | 3.288        |
| 6QD8   | B_HIS_602 | ND1    | F_GLU_611 | OE2    | 3.837        |
| 6QD8   | B_HIS_613 | NE2    | B_ASP_614 | OD2    | 3.771        |
| 6QD8   | L_LYS_39  | NZ     | L_GLU_81  | OE2    | 3.248        |
| 6QD8   | L_ARG_61  | NH2    | L_ASP_82  | OD1    | 2.630        |
| 6QD8   | L_ARG_61  | NH2    | L_ASP_82  | OD2    | 3.110        |
| 6QD8   | L_ARG_96  | NH1    | H_GLU_51  | OE1    | 3.060        |
| 6QD8   | L_ARG_96  | NH1    | H_GLU_51  | OE2    | 3.554        |
| 6QD8   | H_ARG_44  | NH2    | H_GLU_47  | OE1    | 3.870        |
| 6QD8   | H_ARG_55  | NH1    | B_GLU_564 | OE1    | 2.303        |
| 6QD8   | H_ARG_55  | NH1    | B_GLU_564 | OE2    | 3.666        |
| 6QD8   | H_LYS_76  | NZ     | H_ASP_73  | OD2    | 2.834        |
| 6QD8   | C_ARG_64  | NH2    | D_ASP_522 | OD2    | 3.747        |
| 6QD8   | C_ARG_85  | NH1    | C_GLU_178 | OE1    | 3.878        |
| 6QD8   | C_ARG_85  | NH1    | C_GLU_178 | OE2    | 3.144        |
| 6QD8   | C_LYS_114 | NZ     | C_GLU_112 | OE2    | 2.626        |
| 6QD8   | C_LYS_114 | NZ     | C_GLU_120 | OE2    | 3.220        |
| 6QD8   | C_ARG_130 | NH2    | C_ASP_163 | OD1    | 3.061        |
| 6QD8   | C_ARG_134 | NH1    | D_GLU_545 | OE2    | 2.972        |
| 6QD8   | C_HIS_154 | NE2    | C_GLU_178 | OE1    | 2.430        |
| 6QD8   | C_ARG_266 | NH2    | C_ASP_237 | OD2    | 3.393        |
| 6QD8   | E_ARG_64  | NH2    | F_ASP_522 | OD2    | 3.901        |
| 6QD8   | E_ARG_85  | NH1    | E_GLU_178 | OE1    | 3.877        |
| 6QD8   | E_ARG_85  | NH1    | E_GLU_178 | OE2    | 3.145        |
| 6QD8   | E_LYS_114 | NZ     | E_GLU_112 | OE2    | 2.626        |
| 6QD8   | E_LYS_114 | NZ     | E_GLU_120 | OE2    | 3.220        |
| 6QD8   | E_ARG_130 | NH2    | E_ASP_163 | OD1    | 3.061        |
| 6QD8   | E_ARG_134 | NH1    | F_GLU_545 | OE2    | 2.891        |
| 6QD8   | E_HIS_154 | NE2    | E_GLU_178 | OE1    | 2.431        |
| 6QD8   | E_ARG_266 | NH2    | E_ASP_237 | OD2    | 3.393        |
| 6QD8   | F_ARG_559 | NH1    | E_GLU_103 | OE1    | 3.653        |
| 6QD8   | F_ARG_559 | NH1    | E_GLU_103 | OE2    | 2.383        |
| 6QD8   | F_ARG_559 | NH2    | E_GLU_103 | OE1    | 3.116        |
| 6QD8   | F_ARG_559 | NH2    | E_GLU_103 | OE2    | 2.960        |
| 6QD8   | F_HIS_602 | ND1    | D_GLU_611 | OE2    | 3.980        |

|      |           |     |           |     |       |
|------|-----------|-----|-----------|-----|-------|
| 6QD8 | F_HIS_613 | NE2 | F_ASP_614 | OD2 | 3.772 |
| 6QD8 | D_ARG_559 | NH1 | C_GLU_103 | OE1 | 3.634 |
| 6QD8 | D_ARG_559 | NH1 | C_GLU_103 | OE2 | 2.515 |
| 6QD8 | D_ARG_559 | NH2 | C_GLU_103 | OE1 | 3.283 |
| 6QD8 | D_ARG_559 | NH2 | C_GLU_103 | OE2 | 3.254 |
| 6QD8 | D_HIS_602 | ND1 | B_GLU_611 | OE2 | 3.920 |
| 6QD8 | D_HIS_613 | NE2 | D_ASP_614 | OD2 | 3.772 |
| 6QD8 | W_ARG_44  | NH2 | W_GLU_47  | OE1 | 3.870 |
| 6QD8 | W_ARG_55  | NH1 | F_GLU_564 | OE1 | 2.296 |
| 6QD8 | W_ARG_55  | NH1 | F_GLU_564 | OE2 | 3.607 |
| 6QD8 | W_LYS_76  | NZ  | W_ASP_73  | OD2 | 2.835 |
| 6QD8 | Q_ARG_44  | NH2 | Q_GLU_47  | OE1 | 3.871 |
| 6QD8 | Q_ARG_55  | NH1 | D_GLU_564 | OE1 | 2.265 |
| 6QD8 | Q_ARG_55  | NH1 | D_GLU_564 | OE2 | 3.539 |
| 6QD8 | Q_LYS_76  | NZ  | Q_ASP_73  | OD2 | 2.836 |

Table 38: 6QD8-specific salt bridging network analysis. In this table, the residue naming scheme is **Chain ID\_residue name\_residue number**

| PDB ID | Residue A | Atom A | Residue B | Atom B | Distance (Å) |
|--------|-----------|--------|-----------|--------|--------------|
| 6S8D   | L_LYS_109 | NZ     | L_ASP_88  | OD1    | 3.182        |
| 6S8D   | H_ARG_30  | NH2    | P_ASP_104 | OD2    | 3.844        |
| 6S8D   | H_ARG_38  | NH1    | H_ASP_92  | OD1    | 2.379        |
| 6S8D   | H_LYS_78  | NZ     | H_ASP_75  | OD1    | 3.645        |
| 6S8D   | H_LYS_78  | NZ     | H_ASP_75  | OD2    | 2.608        |
| 6S8D   | A_ARG_85  | NH1    | A_GLU_178 | OE1    | 3.862        |
| 6S8D   | A_ARG_85  | NH1    | A_GLU_178 | OE2    | 3.009        |
| 6S8D   | A_ARG_130 | NH2    | A_ASP_163 | OD2    | 3.703        |
| 6S8D   | A_ARG_136 | NH1    | A_GLU_106 | OE2    | 3.841        |
| 6S8D   | A_HIS_154 | NE2    | A_GLU_178 | OE1    | 2.356        |
| 6S8D   | A_ARG_164 | NH1    | A_ASP_163 | OD2    | 3.715        |
| 6S8D   | B_ARG_559 | NH1    | A_GLU_103 | OE1    | 3.375        |
| 6S8D   | B_ARG_559 | NH1    | A_GLU_103 | OE2    | 3.357        |
| 6S8D   | B_ARG_559 | NH2    | A_GLU_103 | OE1    | 3.329        |
| 6S8D   | B_ARG_587 | NH2    | B_GLU_578 | OE1    | 3.148        |
| 6S8D   | B_ARG_596 | NH2    | A_ASP_55  | OD2    | 3.730        |
| 6S8D   | D_ARG_559 | NH1    | C_GLU_103 | OE1    | 3.344        |
| 6S8D   | D_ARG_559 | NH1    | C_GLU_103 | OE2    | 3.304        |
| 6S8D   | D_ARG_559 | NH2    | C_GLU_103 | OE1    | 3.261        |
| 6S8D   | D_ARG_559 | NH2    | C_GLU_103 | OE2    | 3.986        |
| 6S8D   | D_ARG_587 | NH2    | D_GLU_578 | OE1    | 3.148        |
| 6S8D   | D_ARG_596 | NH2    | C_ASP_55  | OD2    | 3.794        |
| 6S8D   | F_ARG_559 | NH1    | E_GLU_103 | OE1    | 3.445        |
| 6S8D   | F_ARG_559 | NH1    | E_GLU_103 | OE2    | 3.366        |
| 6S8D   | F_ARG_559 | NH2    | E_GLU_103 | OE1    | 3.372        |
| 6S8D   | F_ARG_587 | NH2    | F_GLU_578 | OE1    | 3.148        |
| 6S8D   | F_ARG_596 | NH2    | E_ASP_55  | OD2    | 3.605        |
| 6S8D   | O_LYS_109 | NZ     | O_ASP_88  | OD1    | 3.182        |
| 6S8D   | U_LYS_109 | NZ     | U_ASP_88  | OD1    | 3.181        |
| 6S8D   | C_ARG_85  | NH1    | C_GLU_178 | OE1    | 3.862        |
| 6S8D   | C_ARG_85  | NH1    | C_GLU_178 | OE2    | 3.008        |
| 6S8D   | C_ARG_130 | NH2    | C_ASP_163 | OD2    | 3.703        |
| 6S8D   | C_ARG_136 | NH1    | C_GLU_106 | OE2    | 3.842        |
| 6S8D   | C_HIS_154 | NE2    | C_GLU_178 | OE1    | 2.356        |
| 6S8D   | C_ARG_164 | NH1    | C_ASP_163 | OD2    | 3.715        |
| 6S8D   | E_ARG_85  | NH1    | E_GLU_178 | OE1    | 3.862        |
| 6S8D   | E_ARG_85  | NH1    | E_GLU_178 | OE2    | 3.008        |
| 6S8D   | E_LYS_114 | NZ     | Y_ASP_56  | OD2    | 3.842        |
| 6S8D   | E_ARG_130 | NH2    | E_ASP_163 | OD2    | 3.703        |
| 6S8D   | E_ARG_136 | NH1    | E_GLU_106 | OE2    | 3.841        |
| 6S8D   | E_HIS_154 | NE2    | E_GLU_178 | OE1    | 2.357        |
| 6S8D   | E_ARG_164 | NH1    | E_ASP_163 | OD2    | 3.715        |
| 6S8D   | P_ARG_30  | NH2    | Y_ASP_104 | OD2    | 3.808        |
| 6S8D   | P_ARG_38  | NH1    | P_ASP_92  | OD1    | 2.379        |
| 6S8D   | P_LYS_78  | NZ     | P_ASP_75  | OD1    | 3.644        |
| 6S8D   | P_LYS_78  | NZ     | P_ASP_75  | OD2    | 2.608        |
| 6S8D   | Y_ARG_30  | NH2    | H_ASP_104 | OD2    | 3.626        |
| 6S8D   | Y_ARG_38  | NH1    | Y_ASP_92  | OD1    | 2.379        |
| 6S8D   | Y_LYS_78  | NZ     | Y_ASP_75  | OD1    | 3.645        |
| 6S8D   | Y_LYS_78  | NZ     | Y_ASP_75  | OD2    | 2.608        |

Table 39: 6S8D-specific salt bridging network analysis. In this table, the residue naming scheme is **Chain ID** **residue name** **residue number**

| PDB ID | Residue A | Atom A | Residue B | Atom B | Distance (Å) |
|--------|-----------|--------|-----------|--------|--------------|
| 6S8I   | L_ARG_57  | NH1    | L_ASP_63  | OD1    | 3.936        |
| 6S8I   | L_ARG_57  | NH2    | L_ASP_63  | OD2    | 3.681        |
| 6S8I   | L_ARG_64  | NH2    | L_ASP_85  | OD1    | 3.247        |
| 6S8I   | L_LYS_109 | NZ     | L_ASP_88  | OD1    | 3.092        |
| 6S8I   | L_LYS_109 | NZ     | L_ASP_88  | OD2    | 3.761        |
| 6S8I   | H_ARG_38  | NH1    | H_ASP_92  | OD1    | 3.736        |
| 6S8I   | H_ARG_50  | NH2    | H_GLU_61  | OE1    | 3.922        |
| 6S8I   | H_ARG_67  | NH2    | H_GLU_61  | OE2    | 3.135        |
| 6S8I   | H_ARG_69  | NH2    | H_ASP_92  | OD1    | 2.684        |
| 6S8I   | H_ARG_78  | NH1    | H_ASP_75  | OD2    | 3.325        |
| 6S8I   | H_ARG_105 | NH1    | L_GLU_102 | OE1    | 3.601        |
| 6S8I   | H_ARG_105 | NH1    | L_GLU_102 | OE2    | 3.239        |
| 6S8I   | H_ARG_105 | NH2    | L_GLU_102 | OE2    | 2.950        |
| 6S8I   | A_ARG_85  | NH1    | A_GLU_178 | OE1    | 3.349        |
| 6S8I   | A_ARG_85  | NH1    | A_GLU_178 | OE2    | 2.593        |
| 6S8I   | A_LYS_114 | NZ     | H_ASP_56  | OD1    | 2.454        |
| 6S8I   | A_LYS_114 | NZ     | H_ASP_56  | OD2    | 2.783        |
| 6S8I   | A_LYS_114 | NZ     | A_GLU_120 | OE2    | 3.868        |
| 6S8I   | A_ARG_134 | NH1    | B_GLU_545 | OE2    | 3.078        |
| 6S8I   | A_ARG_136 | NH1    | A_GLU_106 | OE2    | 3.794        |
| 6S8I   | A_LYS_140 | NZ     | A_GLU_112 | OE2    | 3.972        |
| 6S8I   | A_HIS_154 | NE2    | A_GLU_178 | OE1    | 2.780        |
| 6S8I   | A_ARG_164 | NH1    | A_ASP_163 | OD1    | 3.922        |
| 6S8I   | A_ARG_164 | NH1    | A_ASP_163 | OD2    | 3.313        |
| 6S8I   | B_ARG_559 | NH1    | A_GLU_103 | OE1    | 3.895        |
| 6S8I   | B_ARG_559 | NH1    | A_GLU_103 | OE2    | 3.783        |
| 6S8I   | B_ARG_559 | NH2    | A_GLU_103 | OE1    | 3.282        |
| 6S8I   | B_ARG_559 | NH2    | A_GLU_103 | OE2    | 3.928        |
| 6S8I   | B_ARG_596 | NH2    | A_ASP_55  | OD1    | 3.671        |
| 6S8I   | D_ARG_559 | NH1    | C_GLU_103 | OE1    | 3.877        |
| 6S8I   | D_ARG_559 | NH1    | C_GLU_103 | OE2    | 3.822        |
| 6S8I   | D_ARG_559 | NH2    | C_GLU_103 | OE1    | 3.248        |
| 6S8I   | D_ARG_559 | NH2    | C_GLU_103 | OE2    | 3.953        |
| 6S8I   | D_ARG_596 | NH2    | C_ASP_55  | OD1    | 3.743        |
| 6S8I   | F_ARG_559 | NH1    | E_GLU_103 | OE1    | 3.975        |
| 6S8I   | F_ARG_559 | NH1    | E_GLU_103 | OE2    | 3.796        |
| 6S8I   | F_ARG_559 | NH2    | E_GLU_103 | OE1    | 3.335        |
| 6S8I   | F_ARG_559 | NH2    | E_GLU_103 | OE2    | 3.908        |
| 6S8I   | F_ARG_596 | NH2    | E_ASP_55  | OD1    | 3.553        |
| 6S8I   | C_ARG_85  | NH1    | C_GLU_178 | OE1    | 3.349        |
| 6S8I   | C_ARG_85  | NH1    | C_GLU_178 | OE2    | 2.593        |
| 6S8I   | C_LYS_114 | NZ     | C_GLU_120 | OE2    | 3.868        |
| 6S8I   | C_LYS_114 | NZ     | P_ASP_56  | OD1    | 2.515        |
| 6S8I   | C_LYS_114 | NZ     | P_ASP_56  | OD2    | 2.783        |
| 6S8I   | C_ARG_134 | NH1    | D_GLU_545 | OE2    | 3.135        |
| 6S8I   | C_ARG_136 | NH1    | C_GLU_106 | OE2    | 3.793        |
| 6S8I   | C_LYS_140 | NZ     | C_GLU_112 | OE2    | 3.972        |
| 6S8I   | C_HIS_154 | NE2    | C_GLU_178 | OE1    | 2.781        |
| 6S8I   | C_ARG_164 | NH1    | C_ASP_163 | OD1    | 3.921        |
| 6S8I   | C_ARG_164 | NH1    | C_ASP_163 | OD2    | 3.312        |
| 6S8I   | E_ARG_85  | NH1    | E_GLU_178 | OE1    | 3.349        |
| 6S8I   | E_ARG_85  | NH1    | E_GLU_178 | OE2    | 2.594        |
| 6S8I   | E_LYS_114 | NZ     | E_GLU_120 | OE2    | 3.868        |
| 6S8I   | E_LYS_114 | NZ     | Y_ASP_56  | OD1    | 2.476        |
| 6S8I   | E_LYS_114 | NZ     | Y_ASP_56  | OD2    | 2.735        |
| 6S8I   | E_ARG_134 | NH1    | F_GLU_545 | OE2    | 3.154        |
| 6S8I   | E_ARG_136 | NH1    | E_GLU_106 | OE2    | 3.794        |

|      |           |     |           |     |       |
|------|-----------|-----|-----------|-----|-------|
| 6S8I | E_LYS_140 | NZ  | E_GLU_112 | OE2 | 3.972 |
| 6S8I | E_HIS_154 | NE2 | E_GLU_178 | OE1 | 2.779 |
| 6S8I | E_ARG_164 | NH1 | E_ASP_163 | OD1 | 3.921 |
| 6S8I | E_ARG_164 | NH1 | E_ASP_163 | OD2 | 3.313 |
| 6S8I | O_ARG_57  | NH1 | O_ASP_63  | OD1 | 3.936 |
| 6S8I | O_ARG_57  | NH2 | O_ASP_63  | OD2 | 3.681 |
| 6S8I | O_ARG_64  | NH2 | O_ASP_85  | OD1 | 3.246 |
| 6S8I | O_LYS_109 | NZ  | O_ASP_88  | OD1 | 3.092 |
| 6S8I | O_LYS_109 | NZ  | O_ASP_88  | OD2 | 3.761 |
| 6S8I | U_ARG_57  | NH1 | U_ASP_63  | OD1 | 3.937 |
| 6S8I | U_ARG_57  | NH2 | U_ASP_63  | OD2 | 3.681 |
| 6S8I | U_ARG_64  | NH2 | U_ASP_85  | OD1 | 3.247 |
| 6S8I | U_LYS_109 | NZ  | U_ASP_88  | OD1 | 3.092 |
| 6S8I | U_LYS_109 | NZ  | U_ASP_88  | OD2 | 3.761 |
| 6S8I | P_ARG_38  | NH1 | P_ASP_92  | OD1 | 3.736 |
| 6S8I | P_ARG_50  | NH2 | P_GLU_61  | OE1 | 3.922 |
| 6S8I | P_ARG_67  | NH2 | P_GLU_61  | OE2 | 3.135 |
| 6S8I | P_ARG_69  | NH2 | P_ASP_92  | OD1 | 2.683 |
| 6S8I | P_ARG_78  | NH1 | P_ASP_75  | OD2 | 3.324 |
| 6S8I | P_ARG_105 | NH1 | O_GLU_102 | OE1 | 3.789 |
| 6S8I | P_ARG_105 | NH1 | O_GLU_102 | OE2 | 3.289 |
| 6S8I | P_ARG_105 | NH2 | O_GLU_102 | OE2 | 3.143 |
| 6S8I | Y_ARG_38  | NH1 | Y_ASP_92  | OD1 | 3.736 |
| 6S8I | Y_ARG_50  | NH2 | Y_GLU_61  | OE1 | 3.922 |
| 6S8I | Y_ARG_67  | NH2 | Y_GLU_61  | OE2 | 3.135 |
| 6S8I | Y_ARG_69  | NH2 | Y_ASP_92  | OD1 | 2.683 |
| 6S8I | Y_ARG_78  | NH1 | Y_ASP_75  | OD2 | 3.325 |
| 6S8I | Y_ARG_105 | NH1 | U_GLU_102 | OE1 | 3.606 |
| 6S8I | Y_ARG_105 | NH1 | U_GLU_102 | OE2 | 3.273 |
| 6S8I | Y_ARG_105 | NH2 | U_GLU_102 | OE2 | 2.978 |

Table 40: 6S8I-specific salt bridging network analysis. In this table, the residue naming scheme is **Chain ID** **residue name** **residue number**

| PDB ID | Residue A | Atom A | Residue B | Atom B | Distance (Å) |
|--------|-----------|--------|-----------|--------|--------------|
| 6S8J   | L_ARG_57  | NH1    | L_ASP_63  | OD1    | 3.597        |
| 6S8J   | L_ARG_57  | NH2    | L_ASP_63  | OD2    | 3.474        |
| 6S8J   | L_ARG_64  | NH2    | L_ASP_85  | OD1    | 3.929        |
| 6S8J   | L_LYS_109 | NZ     | L_ASP_88  | OD1    | 2.806        |
| 6S8J   | L_LYS_109 | NZ     | L_ASP_88  | OD2    | 3.179        |
| 6S8J   | H_ARG_38  | NH2    | H_GLU_46  | OE1    | 3.358        |
| 6S8J   | H_ARG_69  | NH1    | H_ASP_92  | OD1    | 3.693        |
| 6S8J   | H_ARG_69  | NH2    | H_ASP_92  | OD1    | 3.149        |
| 6S8J   | H_ARG_69  | NH2    | H_ASP_92  | OD2    | 3.494        |
| 6S8J   | H_ARG_74  | NH1    | H_ASP_76  | OD1    | 3.838        |
| 6S8J   | H_ARG_74  | NH1    | H_ASP_76  | OD2    | 3.202        |
| 6S8J   | A_ARG_85  | NH1    | A_GLU_178 | OE1    | 3.872        |
| 6S8J   | A_ARG_85  | NH1    | A_GLU_178 | OE2    | 2.923        |
| 6S8J   | A_LYS_114 | NZ     | H_ASP_56  | OD1    | 3.168        |
| 6S8J   | A_LYS_114 | NZ     | H_ASP_56  | OD2    | 2.312        |
| 6S8J   | A_LYS_114 | NZ     | A_GLU_120 | OE2    | 3.844        |
| 6S8J   | A_ARG_134 | NH1    | B_GLU_545 | OE2    | 2.814        |
| 6S8J   | A_ARG_136 | NH1    | A_GLU_106 | OE2    | 3.658        |
| 6S8J   | A_HIS_154 | NE2    | A_GLU_178 | OE1    | 2.462        |
| 6S8J   | A_ARG_164 | NH1    | A_ASP_163 | OD2    | 3.447        |
| 6S8J   | B_ARG_559 | NH1    | A_GLU_103 | OE1    | 3.955        |
| 6S8J   | B_ARG_559 | NH1    | A_GLU_103 | OE2    | 3.604        |
| 6S8J   | B_ARG_559 | NH2    | A_GLU_103 | OE1    | 3.443        |
| 6S8J   | B_ARG_559 | NH2    | A_GLU_103 | OE2    | 3.830        |
| 6S8J   | B_ARG_596 | NH2    | A_ASP_55  | OD1    | 2.986        |
| 6S8J   | B_ARG_596 | NH2    | A_ASP_55  | OD2    | 3.529        |
| 6S8J   | O_ARG_57  | NH1    | O_ASP_63  | OD1    | 3.597        |
| 6S8J   | O_ARG_57  | NH2    | O_ASP_63  | OD2    | 3.473        |
| 6S8J   | O_ARG_64  | NH2    | O_ASP_85  | OD1    | 3.931        |
| 6S8J   | O_LYS_109 | NZ     | O_ASP_88  | OD1    | 2.805        |
| 6S8J   | O_LYS_109 | NZ     | O_ASP_88  | OD2    | 3.179        |
| 6S8J   | U_ARG_57  | NH1    | U_ASP_63  | OD1    | 3.597        |
| 6S8J   | U_ARG_57  | NH2    | U_ASP_63  | OD2    | 3.473        |
| 6S8J   | U_ARG_64  | NH2    | U_ASP_85  | OD1    | 3.930        |
| 6S8J   | U_LYS_109 | NZ     | U_ASP_88  | OD1    | 2.806        |
| 6S8J   | U_LYS_109 | NZ     | U_ASP_88  | OD2    | 3.179        |
| 6S8J   | D_ARG_559 | NH1    | C_GLU_103 | OE1    | 3.872        |
| 6S8J   | D_ARG_559 | NH1    | C_GLU_103 | OE2    | 3.635        |
| 6S8J   | D_ARG_559 | NH2    | C_GLU_103 | OE1    | 3.272        |
| 6S8J   | D_ARG_559 | NH2    | C_GLU_103 | OE2    | 3.792        |
| 6S8J   | D_ARG_596 | NH2    | C_ASP_55  | OD1    | 2.928        |
| 6S8J   | D_ARG_596 | NH2    | C_ASP_55  | OD2    | 3.762        |
| 6S8J   | D_HIS_602 | ND1    | B_GLU_611 | OE1    | 3.866        |
| 6S8J   | D_HIS_602 | NE2    | B_GLU_611 | OE1    | 3.805        |
| 6S8J   | D_HIS_602 | NE2    | B_GLU_611 | OE2    | 3.737        |
| 6S8J   | F_ARG_559 | NH1    | E_GLU_103 | OE1    | 3.993        |
| 6S8J   | F_ARG_559 | NH1    | E_GLU_103 | OE2    | 3.748        |
| 6S8J   | F_ARG_559 | NH2    | E_GLU_103 | OE1    | 3.468        |
| 6S8J   | F_ARG_559 | NH2    | E_GLU_103 | OE2    | 3.952        |
| 6S8J   | F_ARG_596 | NH2    | E_ASP_55  | OD1    | 2.985        |
| 6S8J   | F_ARG_596 | NH2    | E_ASP_55  | OD2    | 3.707        |
| 6S8J   | F_HIS_602 | ND1    | D_GLU_611 | OE1    | 3.880        |
| 6S8J   | F_HIS_602 | NE2    | D_GLU_611 | OE2    | 3.765        |
| 6S8J   | C_ARG_85  | NH1    | C_GLU_178 | OE1    | 3.872        |
| 6S8J   | C_ARG_85  | NH1    | C_GLU_178 | OE2    | 2.922        |
| 6S8J   | C_LYS_114 | NZ     | C_GLU_120 | OE2    | 3.844        |
| 6S8J   | C_LYS_114 | NZ     | P_ASP_56  | OD1    | 3.173        |

|      |           |     |           |     |       |
|------|-----------|-----|-----------|-----|-------|
| 6S8J | C_LYS_114 | NZ  | P_ASP_56  | OD2 | 2.252 |
| 6S8J | C_ARG_134 | NH1 | D_GLU_545 | OE2 | 2.837 |
| 6S8J | C_ARG_136 | NH1 | C_GLU_106 | OE2 | 3.658 |
| 6S8J | C_HIS_154 | NE2 | C_GLU_178 | OE1 | 2.463 |
| 6S8J | C_ARG_164 | NH1 | C_ASP_163 | OD2 | 3.447 |
| 6S8J | E_ARG_85  | NH1 | E_GLU_178 | OE1 | 3.872 |
| 6S8J | E_ARG_85  | NH1 | E_GLU_178 | OE2 | 2.923 |
| 6S8J | E_LYS_114 | NZ  | E_GLU_120 | OE2 | 3.844 |
| 6S8J | E_LYS_114 | NZ  | Y_ASP_56  | OD1 | 3.177 |
| 6S8J | E_LYS_114 | NZ  | Y_ASP_56  | OD2 | 2.185 |
| 6S8J | E_ARG_134 | NH1 | F_GLU_545 | OE2 | 2.997 |
| 6S8J | E_ARG_136 | NH1 | E_GLU_106 | OE2 | 3.659 |
| 6S8J | E_HIS_154 | NE2 | E_GLU_178 | OE1 | 2.462 |
| 6S8J | E_ARG_164 | NH1 | E_ASP_163 | OD2 | 3.447 |
| 6S8J | P_ARG_38  | NH2 | P_GLU_46  | OE1 | 3.357 |
| 6S8J | P_ARG_69  | NH1 | P_ASP_92  | OD1 | 3.693 |
| 6S8J | P_ARG_69  | NH2 | P_ASP_92  | OD1 | 3.150 |
| 6S8J | P_ARG_69  | NH2 | P_ASP_92  | OD2 | 3.494 |
| 6S8J | P_ARG_74  | NH1 | P_ASP_76  | OD1 | 3.838 |
| 6S8J | P_ARG_74  | NH1 | P_ASP_76  | OD2 | 3.202 |
| 6S8J | Y_ARG_38  | NH2 | Y_GLU_46  | OE1 | 3.357 |
| 6S8J | Y_ARG_69  | NH1 | Y_ASP_92  | OD1 | 3.693 |
| 6S8J | Y_ARG_69  | NH2 | Y_ASP_92  | OD1 | 3.150 |
| 6S8J | Y_ARG_69  | NH2 | Y_ASP_92  | OD2 | 3.494 |
| 6S8J | Y_ARG_74  | NH1 | Y_ASP_76  | OD1 | 3.838 |
| 6S8J | Y_ARG_74  | NH1 | Y_ASP_76  | OD2 | 3.202 |

Table 41: 6S8J-specific salt bridging network analysis. In this table, the residue naming scheme is **Chain ID\_residue name\_residue number**

| PDB ID | Residue A | Atom A | Residue B | Atom B | Distance (Å) |
|--------|-----------|--------|-----------|--------|--------------|
| 1EBO   | A.LYS_87  | NZ     | C.ASP_106 | OD2    | 3.887        |
| 1EBO   | A.HIS_112 | ND1    | B.GLU_77  | OE1    | 3.658        |
| 1EBO   | A.HIS_112 | ND1    | B.GLU_77  | OE2    | 3.104        |
| 1EBO   | B.HIS_112 | ND1    | C.GLU_77  | OE1    | 3.068        |
| 1EBO   | B.HIS_112 | ND1    | C.GLU_77  | OE2    | 2.658        |
| 1EBO   | C.LYS_7   | NZ     | B.GLU_9   | OE1    | 3.472        |
| 1EBO   | C.LYS_26  | NZ     | A.GLU_21  | OE1    | 2.847        |
| 1EBO   | C.LYS_26  | NZ     | A.GLU_21  | OE2    | 3.880        |
| 1EBO   | C.LYS_87  | NZ     | B.ASP_106 | OD2    | 3.920        |
| 1EBO   | D.HIS_112 | ND1    | E.GLU_77  | OE1    | 3.490        |
| 1EBO   | D.HIS_112 | ND1    | E.GLU_77  | OE2    | 2.696        |
| 1EBO   | E.LYS_26  | NZ     | F.GLU_21  | OE2    | 3.162        |
| 1EBO   | E.LYS_87  | NZ     | D.ASP_106 | OD2    | 3.925        |
| 1EBO   | F.LYS_26  | NZ     | D.GLU_21  | OE1    | 3.927        |
| 1EBO   | F.LYS_87  | NZ     | E.ASP_106 | OD2    | 3.651        |
| 1EBO   | F.HIS_112 | ND1    | D.GLU_77  | OE2    | 3.188        |

Table 42: 1EBO-specific interfacial salt bridging network analysis. In this table, the residue naming scheme is **Chain ID\_residue name\_residue number**

| PDB ID | Residue A | Atom A | Residue B | Atom B | Distance (Å) |
|--------|-----------|--------|-----------|--------|--------------|
| 2EBO   | A_HIS_613 | ND1    | B_GLU_578 | OE1    | 3.396        |
| 2EBO   | A_HIS_613 | ND1    | B_GLU_578 | OE2    | 3.211        |
| 2EBO   | B_HIS_613 | ND1    | C_GLU_578 | OE1    | 3.346        |
| 2EBO   | B_HIS_613 | ND1    | C_GLU_578 | OE2    | 2.789        |

Table 43: 2EBO-specific interfacial salt bridging network analysis. In this table, the residue naming scheme is **Chain ID\_residue name\_residue number**

| PDB ID | Residue A | Atom A | Residue B | Atom B | Distance (Å) |
|--------|-----------|--------|-----------|--------|--------------|
| 2QHR   | H_LYS_143 | NZ     | L_GLU_125 | OE2    | 2.743        |
| 2QHR   | H_HIS_164 | ND1    | L_GLU_168 | OE1    | 3.446        |
| 2QHR   | H_HIS_164 | ND1    | L_GLU_168 | OE2    | 2.691        |
| 2QHR   | H_LYS_208 | NZ     | L_GLU_124 | OE1    | 3.025        |
| 2QHR   | H_LYS_208 | NZ     | L_GLU_124 | OE2    | 3.278        |
| 2QHR   | L_LYS_204 | NZ     | H_ASP_130 | OD1    | 2.837        |
| 2QHR   | L_LYS_204 | NZ     | H_ASP_130 | OD2    | 3.813        |
| 2QHR   | P_HIS_407 | ND1    | L_ASP_92  | OD1    | 3.553        |
| 2QHR   | P_ARG_409 | NH1    | H_ASP_33  | OD2    | 2.967        |

Table 44: 2QHR-specific interfacial salt bridging network analysis. In this table, the residue naming scheme is **Chain ID\_residue name\_residue number**

| PDB ID | Residue A | Atom A | Residue B | Atom B | Distance (Å) |
|--------|-----------|--------|-----------|--------|--------------|
| 2Y6S   | C_ARG_100 | NH1    | D_GLU_50  | OE1    | 2.758        |
| 2Y6S   | D_LYS_208 | NZ     | C_GLU_127 | OE1    | 3.225        |
| 2Y6S   | H_LYS_208 | NZ     | L_GLU_127 | OE1    | 3.152        |
| 2Y6S   | L_ARG_100 | NH1    | H_GLU_50  | OE1    | 2.759        |
| 2Y6S   | L_ARG_100 | NH2    | H_GLU_50  | OE1    | 3.945        |

Table 45: 2Y6S-specific interfacial salt bridging network analysis. In this table, the residue naming scheme is **Chain ID\_residue name\_residue number**

| PDB ID | Residue A | Atom A | Residue B | Atom B | Distance (Å) |
|--------|-----------|--------|-----------|--------|--------------|
| 3CSY   | A_LYS_221 | NZ     | B_GLU_123 | OE1    | 3.090        |
| 3CSY   | A_LYS_221 | NZ     | B_GLU_123 | OE2    | 3.307        |
| 3CSY   | C_HIS_172 | NE2    | D_ASP_167 | OD2    | 3.885        |
| 3CSY   | C_LYS_221 | NZ     | D_GLU_123 | OE1    | 3.258        |
| 3CSY   | C_LYS_221 | NZ     | D_GLU_123 | OE2    | 3.282        |
| 3CSY   | E_LYS_221 | NZ     | F_GLU_123 | OE1    | 3.238        |
| 3CSY   | E_LYS_221 | NZ     | F_GLU_123 | OE2    | 3.205        |
| 3CSY   | G_HIS_172 | NE2    | H_ASP_167 | OD2    | 3.733        |
| 3CSY   | G_LYS_221 | NZ     | H_GLU_123 | OE1    | 3.440        |
| 3CSY   | G_LYS_221 | NZ     | H_GLU_123 | OE2    | 3.445        |
| 3CSY   | I_ARG_134 | NH1    | J_GLU_545 | OE2    | 3.043        |
| 3CSY   | J_ARG_559 | NH2    | I_GLU_103 | OE1    | 3.261        |
| 3CSY   | J_ARG_559 | NH2    | I_GLU_103 | OE2    | 3.005        |
| 3CSY   | K_ARG_134 | NH1    | L_GLU_545 | OE2    | 3.181        |
| 3CSY   | L_ARG_559 | NH2    | K_GLU_103 | OE1    | 3.317        |
| 3CSY   | L_ARG_559 | NH2    | K_GLU_103 | OE2    | 3.156        |
| 3CSY   | M_ARG_134 | NH1    | N_GLU_545 | OE2    | 2.894        |
| 3CSY   | N_ARG_559 | NH2    | M_GLU_103 | OE1    | 2.925        |
| 3CSY   | N_ARG_559 | NH2    | M_GLU_103 | OE2    | 3.048        |
| 3CSY   | O_ARG_134 | NH1    | P_GLU_545 | OE2    | 3.026        |
| 3CSY   | P_ARG_559 | NH2    | O_GLU_103 | OE1    | 3.054        |
| 3CSY   | P_ARG_559 | NH2    | O_GLU_103 | OE2    | 2.808        |

Table 46: 3CSY-specific interfacial salt bridging network analysis. In this table, the residue naming scheme is **Chain ID\_residue name\_residue number**

| PDB ID | Residue A | Atom A | Residue B | Atom B | Distance (Å) |
|--------|-----------|--------|-----------|--------|--------------|
| 3VE0   | J_ARG_559 | NH1    | I_GLU_103 | OE1    | 3.852        |
| 3VE0   | J_ARG_559 | NH1    | I_GLU_103 | OE2    | 3.848        |
| 3VE0   | J_ARG_559 | NH2    | I_GLU_103 | OE1    | 2.444        |
| 3VE0   | J_ARG_559 | NH2    | I_GLU_103 | OE2    | 2.766        |
| 3VE0   | J_ARG_595 | NH2    | I_ASP_49  | OD2    | 3.842        |
| 3VE0   | J_ARG_596 | NH1    | I_ASP_55  | OD1    | 3.003        |
| 3VE0   | A_ARG_98  | NH2    | I_GLU_44  | OE1    | 3.137        |
| 3VE0   | A_ARG_98  | NH2    | I_GLU_44  | OE2    | 3.008        |
| 3VE0   | A_LYS_214 | NZ     | B_GLU_123 | OE1    | 3.666        |
| 3VE0   | A_LYS_214 | NZ     | B_GLU_123 | OE2    | 2.624        |

Table 47: 3VE0-specific interfacial salt bridging network analysis. In this table, the residue naming scheme is **Chain ID\_residue name\_residue number**

| PDB ID | Residue A | Atom A | Residue B | Atom B | Distance (Å) |
|--------|-----------|--------|-----------|--------|--------------|
| 5F1B   | A_ARG_134 | NH1    | B_GLU_545 | OE2    | 3.659        |
| 5F1B   | B_ARG_559 | NH1    | A_GLU_103 | OE1    | 3.219        |
| 5F1B   | B_ARG_559 | NH1    | A_GLU_103 | OE2    | 3.449        |
| 5F1B   | B_ARG_559 | NH2    | A_GLU_103 | OE1    | 3.928        |
| 5F1B   | B_ARG_559 | NH2    | A_GLU_103 | OE2    | 2.697        |
| 5F1B   | B_LYS_588 | NZ     | A_ASP_47  | OD1    | 3.551        |
| 5F1B   | B_LYS_588 | NZ     | A_ASP_47  | OD2    | 3.521        |

Table 48: 5F1B-specific interfacial salt bridging network analysis. In this table, the residue naming scheme is **Chain ID\_residue name\_residue number**

| PDB ID | Residue A | Atom A | Residue B | Atom B | Distance (Å) |
|--------|-----------|--------|-----------|--------|--------------|
| 5FHC   | J_ARG_559 | NH2    | K_GLU_103 | OE1    | 3.531        |
| 5FHC   | J_ARG_559 | NH2    | K_GLU_103 | OE2    | 3.399        |
| 5FHC   | K_ARG_134 | NH1    | J_GLU_545 | OE2    | 2.861        |
| 5FHC   | A_LYS_143 | NZ     | B_GLU_124 | OE2    | 2.678        |
| 5FHC   | A_LYS_209 | NZ     | B_GLU_123 | OE1    | 2.702        |
| 5FHC   | A_LYS_209 | NZ     | B_GLU_123 | OE2    | 3.358        |
| 5FHC   | H_LYS_209 | NZ     | L_GLU_123 | OE1    | 3.238        |
| 5FHC   | H_LYS_209 | NZ     | L_GLU_123 | OE2    | 3.173        |

Table 49: 5FHC-specific interfacial salt bridging network analysis. In this table, the residue naming scheme is **Chain ID.residue name\_residue number**

| PDB ID | Residue A | Atom A | Residue B | Atom B | Distance (Å) |
|--------|-----------|--------|-----------|--------|--------------|
| 5HJ3   | D_LYS_510 | NZ     | J_GLU_55  | OE1    | 3.743        |
| 5HJ3   | D_LYS_510 | NZ     | J_GLU_55  | OE2    | 3.493        |
| 5HJ3   | D_ARG_559 | NH2    | C_GLU_103 | OE1    | 2.496        |
| 5HJ3   | D_ARG_559 | NH2    | C_GLU_103 | OE2    | 2.573        |
| 5HJ3   | E_LYS_221 | NZ     | F_GLU_123 | OE2    | 3.658        |
| 5HJ3   | H_LYS_510 | NZ     | F_GLU_55  | OE2    | 3.815        |
| 5HJ3   | H_ARG_559 | NH2    | G_GLU_103 | OE1    | 2.521        |
| 5HJ3   | H_ARG_559 | NH2    | G_GLU_103 | OE2    | 2.719        |
| 5HJ3   | I_HIS_172 | NE2    | J_ASP_167 | OD2    | 3.705        |
| 5HJ3   | I_LYS_221 | NZ     | J_GLU_123 | OE1    | 3.253        |
| 5HJ3   | I_LYS_221 | NZ     | J_GLU_123 | OE2    | 2.800        |
| 5HJ3   | L_ARG_559 | NH2    | K_GLU_103 | OE1    | 2.680        |
| 5HJ3   | L_ARG_559 | NH2    | K_GLU_103 | OE2    | 2.484        |
| 5HJ3   | L_HIS_602 | ND1    | H_GLU_611 | OE1    | 3.679        |
| 5HJ3   | L_HIS_602 | NE2    | H_GLU_611 | OE1    | 3.945        |
| 5HJ3   | M_LYS_221 | NZ     | N_GLU_123 | OE1    | 3.397        |
| 5HJ3   | M_LYS_221 | NZ     | N_GLU_123 | OE2    | 3.011        |
| 5HJ3   | P_LYS_510 | NZ     | B_GLU_55  | OE1    | 3.843        |
| 5HJ3   | P_LYS_510 | NZ     | B_GLU_55  | OE2    | 3.553        |
| 5HJ3   | P_ARG_559 | NH2    | O_GLU_103 | OE1    | 2.547        |
| 5HJ3   | P_ARG_559 | NH2    | O_GLU_103 | OE2    | 2.625        |
| 5HJ3   | P_HIS_602 | NE2    | L_GLU_611 | OE1    | 3.277        |
| 5HJ3   | A_LYS_221 | NZ     | B_GLU_123 | OE1    | 3.583        |
| 5HJ3   | A_LYS_221 | NZ     | B_GLU_123 | OE2    | 3.404        |

Table 50: 5HJ3-specific interfacial salt bridging network analysis. In this table, the residue naming scheme is **Chain ID\_residue name\_residue number**

| PDB ID | Residue A | Atom A | Residue B | Atom B | Distance (Å) |
|--------|-----------|--------|-----------|--------|--------------|
| 5JNX   | C_ARG_134 | NH1    | D_GLU_545 | OE2    | 3.659        |
| 5JNX   | D_ARG_559 | NH1    | C_GLU_103 | OE1    | 3.220        |
| 5JNX   | D_ARG_559 | NH1    | C_GLU_103 | OE2    | 3.450        |
| 5JNX   | D_ARG_559 | NH2    | C_GLU_103 | OE1    | 3.927        |
| 5JNX   | D_ARG_559 | NH2    | C_GLU_103 | OE2    | 2.697        |
| 5JNX   | D_LYS_588 | NZ     | C_ASP_47  | OD1    | 3.551        |
| 5JNX   | D_LYS_588 | NZ     | C_ASP_47  | OD2    | 3.521        |
| 5JNX   | E_ARG_134 | NH1    | F_GLU_545 | OE2    | 3.660        |
| 5JNX   | E_LYS_155 | NZ     | A_ASP_502 | OD2    | 3.701        |
| 5JNX   | F_ARG_559 | NH1    | E_GLU_103 | OE1    | 3.219        |
| 5JNX   | F_ARG_559 | NH1    | E_GLU_103 | OE2    | 3.448        |
| 5JNX   | F_ARG_559 | NH2    | E_GLU_103 | OE1    | 3.927        |
| 5JNX   | F_ARG_559 | NH2    | E_GLU_103 | OE2    | 2.697        |
| 5JNX   | F_LYS_588 | NZ     | E_ASP_47  | OD1    | 3.552        |
| 5JNX   | F_LYS_588 | NZ     | E_ASP_47  | OD2    | 3.520        |
| 5JNX   | G_ARG_134 | NH1    | H_GLU_545 | OE2    | 3.659        |
| 5JNX   | H_ARG_559 | NH1    | G_GLU_103 | OE1    | 3.221        |
| 5JNX   | H_ARG_559 | NH1    | G_GLU_103 | OE2    | 3.449        |
| 5JNX   | H_ARG_559 | NH2    | G_GLU_103 | OE1    | 3.928        |
| 5JNX   | H_ARG_559 | NH2    | G_GLU_103 | OE2    | 2.697        |
| 5JNX   | H_LYS_588 | NZ     | G_ASP_47  | OD1    | 3.552        |
| 5JNX   | H_LYS_588 | NZ     | G_ASP_47  | OD2    | 3.522        |

Table 51: 5JNX-specific interfacial salt bridging network analysis. In this table, the residue naming scheme is **Chain ID\_residue name\_residue number**

| PDB ID | Residue A | Atom A | Residue B | Atom B | Distance (Å) |
|--------|-----------|--------|-----------|--------|--------------|
| 5JQ3   | B_ARG_559 | NH1    | A_GLU_103 | OE1    | 2.754        |
| 5JQ3   | B_ARG_559 | NH1    | A_GLU_103 | OE2    | 3.830        |
| 5JQ3   | B_ARG_559 | NH2    | A_GLU_103 | OE1    | 3.362        |
| 5JQ3   | B_ARG_559 | NH2    | A_GLU_103 | OE2    | 2.945        |

Table 52: 5JQ3-specific interfacial salt bridging network analysis. In this table, the residue naming scheme is **Chain ID\_residue name\_residue number**

| PDB ID | Residue A | Atom A | Residue B | Atom B | Distance (Å) |
|--------|-----------|--------|-----------|--------|--------------|
| 5JQ7   | B_LYS_510 | NZ     | A_GLU_292 | OE1    | 3.131        |
| 5JQ7   | B_ARG_559 | NH1    | A_GLU_103 | OE1    | 2.800        |
| 5JQ7   | B_ARG_559 | NH1    | A_GLU_103 | OE2    | 3.720        |
| 5JQ7   | B_ARG_559 | NH2    | A_GLU_103 | OE1    | 3.375        |
| 5JQ7   | B_ARG_559 | NH2    | A_GLU_103 | OE2    | 2.748        |

Table 53: 5JQ7-specific interfacial salt bridging network analysis. In this table, the residue naming scheme is **Chain ID\_residue name\_residue number**

| PDB ID | Residue A | Atom A | Residue B | Atom B | Distance (Å) |
|--------|-----------|--------|-----------|--------|--------------|
| 5JQB   | B_LYS_510 | NZ     | A_GLU_292 | OE1    | 2.746        |
| 5JQB   | B_LYS_510 | NZ     | A_GLU_292 | OE2    | 3.918        |
| 5JQB   | B_ARG_559 | NH1    | A_GLU_103 | OE1    | 2.703        |
| 5JQB   | B_ARG_559 | NH1    | A_GLU_103 | OE2    | 3.788        |
| 5JQB   | B_ARG_559 | NH2    | A_GLU_103 | OE1    | 3.188        |
| 5JQB   | B_ARG_559 | NH2    | A_GLU_103 | OE2    | 2.857        |
| 5JQB   | B_LYS_588 | NZ     | A_ASP_47  | OD1    | 3.558        |
| 5JQB   | B_LYS_588 | NZ     | A_ASP_47  | OD2    | 3.148        |

Table 54: 5JQB-specific interfacial salt bridging network analysis. In this table, the residue naming scheme is **Chain ID.residue name\_residue number**

| PDB ID | Residue A | Atom A | Residue B | Atom B | Distance (Å) |
|--------|-----------|--------|-----------|--------|--------------|
| 5KEL   | A_ARG_130 | NH1    | B_GLU_540 | OE2    | 3.053        |
| 5KEL   | A_LYS_272 | NZ     | C_ASP_54  | OD2    | 3.464        |
| 5KEL   | A_LYS_272 | NZ     | C_ASP_56  | OD2    | 2.595        |
| 5KEL   | B_ARG_559 | NH1    | A_GLU_103 | OE2    | 3.831        |
| 5KEL   | B_ARG_559 | NH2    | A_GLU_103 | OE1    | 3.279        |
| 5KEL   | B_ARG_559 | NH2    | A_GLU_103 | OE2    | 3.801        |
| 5KEL   | E_ARG_130 | NH1    | G_GLU_540 | OE2    | 3.054        |
| 5KEL   | E_LYS_272 | NZ     | J_ASP_54  | OD2    | 3.464        |
| 5KEL   | E_LYS_272 | NZ     | J_ASP_56  | OD2    | 2.596        |
| 5KEL   | G_ARG_559 | NH1    | E_GLU_103 | OE2    | 3.832        |
| 5KEL   | G_ARG_559 | NH2    | E_GLU_103 | OE1    | 3.279        |
| 5KEL   | G_ARG_559 | NH2    | E_GLU_103 | OE2    | 3.802        |
| 5KEL   | F_ARG_130 | NH1    | I_GLU_540 | OE2    | 3.053        |
| 5KEL   | F_LYS_272 | NZ     | M_ASP_54  | OD2    | 3.463        |
| 5KEL   | F_LYS_272 | NZ     | M_ASP_56  | OD2    | 2.596        |
| 5KEL   | I_ARG_559 | NH1    | F_GLU_103 | OE2    | 3.831        |
| 5KEL   | I_ARG_559 | NH2    | F_GLU_103 | OE1    | 3.279        |
| 5KEL   | I_ARG_559 | NH2    | F_GLU_103 | OE2    | 3.801        |

Table 55: 5KEL-specific interfacial salt bridging network analysis. In this table, the residue naming scheme is **Chain ID\_residue name\_residue number**

| PDB ID | Residue A | Atom A | Residue B | Atom B | Distance (Å) |
|--------|-----------|--------|-----------|--------|--------------|
| 5KEM   | A_LYS.272 | NZ     | D_ASP.54  | OD1    | 2.876        |
| 5KEM   | A_LYS.272 | NZ     | D_ASP.54  | OD2    | 3.185        |
| 5KEM   | F_LYS.272 | NZ     | I_ASP.54  | OD1    | 2.876        |
| 5KEM   | F_LYS.272 | NZ     | I_ASP.54  | OD2    | 3.185        |

Table 56: 5KEM-specific interfacial salt bridging network analysis. In this table, the residue naming scheme is **Chain ID\_residue name\_residue number**

| PDB ID | Residue A | Atom A | Residue B | Atom B | Distance (Å) |
|--------|-----------|--------|-----------|--------|--------------|
| 5KEN   | A_ARG_134 | NH2    | B_GLU_545 | OE1    | 2.859        |
| 5KEN   | B_LYS_510 | NZ     | D_GLU_56  | OE1    | 3.639        |
| 5KEN   | B_LYS_510 | NZ     | D_GLU_56  | OE2    | 2.773        |
| 5KEN   | B_HIS_549 | NE2    | C_ASP_52  | OD1    | 3.874        |
| 5KEN   | B_ARG_559 | NH1    | A_GLU_103 | OE1    | 3.709        |
| 5KEN   | B_ARG_559 | NH1    | A_GLU_103 | OE2    | 2.818        |
| 5KEN   | B_ARG_559 | NH2    | A_GLU_103 | OE1    | 3.114        |
| 5KEN   | B_ARG_559 | NH2    | A_GLU_103 | OE2    | 3.662        |
| 5KEN   | E_LYS_272 | NZ     | J_ASP_54  | OD2    | 3.722        |
| 5KEN   | E_LYS_272 | NZ     | J_ASP_56  | OD1    | 3.736        |
| 5KEN   | E_LYS_272 | NZ     | J_ASP_56  | OD2    | 2.765        |
| 5KEN   | F_LYS_510 | NZ     | H_GLU_56  | OE2    | 2.720        |
| 5KEN   | F_HIS_549 | NE2    | G_ASP_52  | OD1    | 3.491        |
| 5KEN   | F_ARG_559 | NH1    | E_GLU_103 | OE1    | 3.868        |
| 5KEN   | F_ARG_559 | NH1    | E_GLU_103 | OE2    | 2.947        |
| 5KEN   | F_ARG_559 | NH2    | E_GLU_103 | OE1    | 3.043        |
| 5KEN   | F_ARG_559 | NH2    | E_GLU_103 | OE2    | 3.542        |
| 5KEN   | G_LYS_62  | NZ     | H_ASP_1   | OD2    | 2.735        |
| 5KEN   | K_LYS_272 | NZ     | Q_ASP_54  | OD2    | 3.814        |
| 5KEN   | K_LYS_272 | NZ     | Q_ASP_56  | OD1    | 3.710        |
| 5KEN   | K_LYS_272 | NZ     | Q_ASP_56  | OD2    | 2.769        |
| 5KEN   | M_LYS_510 | NZ     | O_GLU_56  | OE2    | 2.667        |
| 5KEN   | M_ARG_559 | NH1    | K_GLU_103 | OE1    | 3.708        |
| 5KEN   | M_ARG_559 | NH1    | K_GLU_103 | OE2    | 2.824        |
| 5KEN   | M_ARG_559 | NH2    | K_GLU_103 | OE1    | 3.090        |
| 5KEN   | M_ARG_559 | NH2    | K_GLU_103 | OE2    | 3.645        |
| 5KEN   | N_LYS_62  | NZ     | O_ASP_1   | OD2    | 2.793        |

Table 57: 5KEN-specific interfacial salt bridging network analysis. In this table, the residue naming scheme is **Chain ID\_residue name\_residue number**

| PDB ID | Residue A | Atom A | Residue B | Atom B | Distance (Å) |
|--------|-----------|--------|-----------|--------|--------------|
| 6DZL   | G_HIS_96  | ND1    | J_GLU_55  | OE2    | 3.342        |
| 6DZL   | G_HIS_96  | NE2    | J_GLU_55  | OE1    | 3.570        |
| 6DZL   | G_HIS_96  | NE2    | J_GLU_55  | OE2    | 3.728        |
| 6DZL   | H_HIS_96  | ND1    | K_GLU_55  | OE2    | 3.341        |
| 6DZL   | H_HIS_96  | NE2    | K_GLU_55  | OE1    | 3.571        |
| 6DZL   | H_HIS_96  | NE2    | K_GLU_55  | OE2    | 3.727        |
| 6DZL   | I_HIS_96  | ND1    | L_GLU_55  | OE2    | 3.341        |
| 6DZL   | I_HIS_96  | NE2    | L_GLU_55  | OE1    | 3.571        |
| 6DZL   | I_HIS_96  | NE2    | L_GLU_55  | OE2    | 3.727        |

Table 58: 6DZL-specific interfacial salt bridging network analysis. In this table, the residue naming scheme is **Chain ID\_residue name\_residue number**

| PDB ID | Residue A | Atom A | Residue B | Atom B | Distance (Å) |
|--------|-----------|--------|-----------|--------|--------------|
| 6EA7   | B_ARG_559 | NH1    | A_GLU_103 | OE1    | 2.641        |
| 6EA7   | B_ARG_559 | NH1    | A_GLU_103 | OE2    | 3.432        |
| 6EA7   | B_ARG_559 | NH2    | A_GLU_103 | OE2    | 3.686        |
| 6EA7   | B_HIS_602 | ND1    | F_GLU_611 | OE1    | 3.135        |
| 6EA7   | D_ARG_559 | NH1    | C_GLU_103 | OE1    | 2.573        |
| 6EA7   | D_ARG_559 | NH1    | C_GLU_103 | OE2    | 3.488        |
| 6EA7   | D_ARG_559 | NH2    | C_GLU_103 | OE1    | 3.832        |
| 6EA7   | D_ARG_559 | NH2    | C_GLU_103 | OE2    | 3.318        |
| 6EA7   | D_HIS_602 | ND1    | B_GLU_611 | OE1    | 3.062        |
| 6EA7   | F_ARG_559 | NH1    | E_GLU_103 | OE1    | 2.812        |
| 6EA7   | F_ARG_559 | NH1    | E_GLU_103 | OE2    | 3.584        |
| 6EA7   | F_ARG_559 | NH2    | E_GLU_103 | OE2    | 3.608        |
| 6EA7   | F_ARG_596 | NH2    | E_ASP_55  | OD1    | 2.483        |
| 6EA7   | F_ARG_596 | NH2    | E_ASP_55  | OD2    | 3.342        |
| 6EA7   | F_HIS_602 | ND1    | D_GLU_611 | OE1    | 3.253        |
| 6EA7   | H_HIS_100 | ND1    | L_GLU_55  | OE1    | 3.325        |
| 6EA7   | H_HIS_100 | NE2    | L_GLU_55  | OE1    | 3.655        |
| 6EA7   | H_HIS_108 | NE2    | L_ASP_50  | OD1    | 2.912        |
| 6EA7   | H_HIS_173 | ND1    | L_ASP_166 | OD1    | 3.947        |
| 6EA7   | H_HIS_173 | ND1    | L_ASP_166 | OD2    | 3.590        |
| 6EA7   | H_LYS_218 | NZ     | L_GLU_122 | OE1    | 2.826        |
| 6EA7   | M_HIS_100 | ND1    | N_GLU_55  | OE1    | 3.446        |
| 6EA7   | M_HIS_100 | ND1    | N_GLU_55  | OE2    | 3.681        |
| 6EA7   | M_HIS_108 | ND1    | N_ASP_50  | OD1    | 3.757        |
| 6EA7   | M_HIS_108 | NE2    | N_ASP_50  | OD1    | 3.718        |
| 6EA7   | M_HIS_173 | ND1    | N_ASP_166 | OD2    | 3.701        |
| 6EA7   | Q_HIS_108 | NE2    | R_ASP_50  | OD1    | 3.227        |
| 6EA7   | Q_HIS_173 | ND1    | R_ASP_166 | OD1    | 3.817        |
| 6EA7   | Q_HIS_173 | ND1    | R_ASP_166 | OD2    | 3.600        |

Table 59: 6EA7-specific interfacial salt bridging network analysis. In this table, the residue naming scheme is **Chain ID.residue name.residue number**

| PDB ID | Residue A | Atom A | Residue B | Atom B | Distance (Å) |
|--------|-----------|--------|-----------|--------|--------------|
| 6F5U   | B_LYS_510 | NZ     | A_GLU_292 | OE1    | 3.345        |
| 6F5U   | B_ARG_559 | NH1    | A_GLU_103 | OE1    | 2.631        |
| 6F5U   | B_ARG_559 | NH1    | A_GLU_103 | OE2    | 3.833        |
| 6F5U   | B_ARG_559 | NH2    | A_GLU_103 | OE1    | 3.290        |
| 6F5U   | B_ARG_559 | NH2    | A_GLU_103 | OE2    | 2.992        |

Table 60: 6F5U-specific interfacial salt bridging network analysis. In this table, the residue naming scheme is **Chain ID\_residue name\_residue number**

| PDB ID | Residue A | Atom A | Residue B | Atom B | Distance (Å) |
|--------|-----------|--------|-----------|--------|--------------|
| 6F6I   | B_LYS_510 | NZ     | A_GLU_292 | OE1    | 3.377        |
| 6F6I   | B_ARG_559 | NH1    | A_GLU_103 | OE1    | 3.800        |
| 6F6I   | B_ARG_559 | NH1    | A_GLU_103 | OE2    | 2.815        |
| 6F6I   | B_ARG_559 | NH2    | A_GLU_103 | OE1    | 3.096        |
| 6F6I   | B_ARG_559 | NH2    | A_GLU_103 | OE2    | 3.529        |

Table 61: 6F6I-specific interfacial salt bridging network analysis. In this table, the residue naming scheme is **Chain ID\_residue name\_residue number**

| PDB ID | Residue A | Atom A | Residue B | Atom B | Distance (Å) |
|--------|-----------|--------|-----------|--------|--------------|
| 6F6N   | B_LYS_510 | NZ     | A_GLU_292 | OE1    | 2.639        |
| 6F6N   | B_ARG_559 | NH1    | A_GLU_103 | OE1    | 2.593        |
| 6F6N   | B_ARG_559 | NH1    | A_GLU_103 | OE2    | 3.789        |
| 6F6N   | B_ARG_559 | NH2    | A_GLU_103 | OE1    | 3.215        |
| 6F6N   | B_ARG_559 | NH2    | A_GLU_103 | OE2    | 2.904        |
| 6F6N   | B_LYS_588 | NZ     | A_ASP_47  | OD1    | 3.696        |
| 6F6N   | B_LYS_588 | NZ     | A_ASP_47  | OD2    | 2.975        |

Table 62: 6F6N-specific interfacial salt bridging network analysis. In this table, the residue naming scheme is **Chain ID\_residue name\_residue number**

| PDB ID | Residue A | Atom A | Residue B | Atom B | Distance (Å) |
|--------|-----------|--------|-----------|--------|--------------|
| 6F6S   | B_LYS_510 | NZ     | A_GLU_292 | OE1    | 2.331        |
| 6F6S   | B_LYS_510 | NZ     | A_GLU_292 | OE2    | 3.397        |
| 6F6S   | B_ARG_559 | NH1    | A_GLU_103 | OE1    | 2.656        |
| 6F6S   | B_ARG_559 | NH1    | A_GLU_103 | OE2    | 3.920        |
| 6F6S   | B_ARG_559 | NH2    | A_GLU_103 | OE1    | 3.146        |
| 6F6S   | B_ARG_559 | NH2    | A_GLU_103 | OE2    | 2.951        |
| 6F6S   | B_LYS_588 | NZ     | A_ASP_47  | OD1    | 2.944        |
| 6F6S   | B_LYS_588 | NZ     | A_ASP_47  | OD2    | 2.772        |

Table 63: 6F6S-specific interfacial salt bridging network analysis. In this table, the residue naming scheme is **Chain ID.residue name\_residue number**

| PDB ID | Residue A | Atom A | Residue B | Atom B | Distance (Å) |
|--------|-----------|--------|-----------|--------|--------------|
| 6G95   | B_ARG_559 | NH1    | A_GLU_103 | OE1    | 2.683        |
| 6G95   | B_ARG_559 | NH1    | A_GLU_103 | OE2    | 3.879        |
| 6G95   | B_ARG_559 | NH2    | A_GLU_103 | OE1    | 3.249        |
| 6G95   | B_ARG_559 | NH2    | A_GLU_103 | OE2    | 2.973        |

Table 64: 6G95-specific interfacial salt bridging network analysis. In this table, the residue naming scheme is **Chain ID\_residue name\_residue number**

| PDB ID | Residue A | Atom A | Residue B | Atom B | Distance (Å) |
|--------|-----------|--------|-----------|--------|--------------|
| 6G9B   | B_LYS_510 | NZ     | A_GLU_292 | OE1    | 3.414        |
| 6G9B   | B_ARG_559 | NH1    | A_GLU_103 | OE1    | 2.574        |
| 6G9B   | B_ARG_559 | NH1    | A_GLU_103 | OE2    | 3.760        |
| 6G9B   | B_ARG_559 | NH2    | A_GLU_103 | OE1    | 3.199        |
| 6G9B   | B_ARG_559 | NH2    | A_GLU_103 | OE2    | 2.870        |
| 6G9B   | B_LYS_588 | NZ     | A_ASP_47  | OD1    | 3.317        |
| 6G9B   | B_LYS_588 | NZ     | A_ASP_47  | OD2    | 2.892        |

Table 65: 6G9B-specific interfacial salt bridging network analysis. In this table, the residue naming scheme is **Chain ID\_residue name\_residue number**

| PDB ID | Residue A | Atom A | Residue B | Atom B | Distance (Å) |
|--------|-----------|--------|-----------|--------|--------------|
| 6G9I   | B_ARG_559 | NH1    | A_GLU_103 | OE1    | 2.689        |
| 6G9I   | B_ARG_559 | NH1    | A_GLU_103 | OE2    | 3.794        |
| 6G9I   | B_ARG_559 | NH2    | A_GLU_103 | OE1    | 3.340        |
| 6G9I   | B_ARG_559 | NH2    | A_GLU_103 | OE2    | 2.940        |

Table 66: 6G9I-specific interfacial salt bridging network analysis. In this table, the residue naming scheme is **Chain ID\_residue name\_residue number**

| PDB ID | Residue A | Atom A | Residue B | Atom B | Distance (Å) |
|--------|-----------|--------|-----------|--------|--------------|
| 6HRO   | B_LYS_510 | NZ     | A_GLU_292 | OE1    | 3.852        |
| 6HRO   | B_ARG_559 | NH1    | A_GLU_103 | OE1    | 2.817        |
| 6HRO   | B_ARG_559 | NH1    | A_GLU_103 | OE2    | 3.911        |
| 6HRO   | B_ARG_559 | NH2    | A_GLU_103 | OE1    | 3.514        |
| 6HRO   | B_ARG_559 | NH2    | A_GLU_103 | OE2    | 3.164        |
| 6HRO   | B_LYS_588 | NZ     | A_ASP_47  | OD1    | 3.207        |
| 6HRO   | B_LYS_588 | NZ     | A_ASP_47  | OD2    | 2.778        |

Table 67: 6HRO-specific interfacial salt bridging network analysis. In this table, the residue naming scheme is **Chain ID\_residue name\_residue number**

| PDB ID | Residue A | Atom A | Residue B | Atom B | Distance (Å) |
|--------|-----------|--------|-----------|--------|--------------|
| 6HS4   | B_ARG_559 | NH1    | A_GLU_103 | OE1    | 2.624        |
| 6HS4   | B_ARG_559 | NH1    | A_GLU_103 | OE2    | 3.811        |
| 6HS4   | B_ARG_559 | NH2    | A_GLU_103 | OE1    | 3.176        |
| 6HS4   | B_ARG_559 | NH2    | A_GLU_103 | OE2    | 2.846        |
| 6HS4   | B_LYS_588 | NZ     | A_ASP_47  | OD1    | 3.053        |
| 6HS4   | B_LYS_588 | NZ     | A_ASP_47  | OD2    | 2.954        |

Table 68: 6HS4-specific interfacial salt bridging network analysis. In this table, the residue naming scheme is **Chain ID\_residue name\_residue number**

| PDB ID | Residue A | Atom A | Residue B | Atom B | Distance (Å) |
|--------|-----------|--------|-----------|--------|--------------|
| 6MAM   | A_LYS_227 | NZ     | B_GLU_125 | OE1    | 3.431        |
| 6MAM   | C_HIS_182 | NE2    | D_ASP_169 | OD2    | 3.087        |
| 6MAM   | C_LYS_227 | NZ     | D_GLU_125 | OE1    | 3.951        |
| 6MAM   | H_ARG_559 | NH1    | G_GLU_103 | OE1    | 2.237        |
| 6MAM   | H_ARG_559 | NH1    | G_GLU_103 | OE2    | 3.123        |
| 6MAM   | H_ARG_559 | NH2    | G_GLU_103 | OE1    | 3.565        |
| 6MAM   | H_ARG_559 | NH2    | G_GLU_103 | OE2    | 2.826        |
| 6MAM   | J_ARG_559 | NH1    | I_GLU_103 | OE1    | 2.281        |
| 6MAM   | J_ARG_559 | NH1    | I_GLU_103 | OE2    | 3.223        |
| 6MAM   | J_ARG_559 | NH2    | I_GLU_103 | OE1    | 3.504        |
| 6MAM   | J_ARG_559 | NH2    | I_GLU_103 | OE2    | 2.826        |
| 6MAM   | L_ARG_559 | NH1    | K_GLU_103 | OE1    | 2.658        |
| 6MAM   | L_ARG_559 | NH1    | K_GLU_103 | OE2    | 3.420        |
| 6MAM   | L_ARG_559 | NH2    | K_GLU_103 | OE1    | 3.722        |
| 6MAM   | L_ARG_559 | NH2    | K_GLU_103 | OE2    | 2.995        |

Table 69: 6MAM-specific interfacial salt bridging network analysis. In this table, the residue naming scheme is **Chain ID\_residue name\_residue number**

| PDB ID | Residue A | Atom A | Residue B | Atom B | Distance (Å) |
|--------|-----------|--------|-----------|--------|--------------|
| 6NAE   | B_LYS_510 | NZ     | A_GLU_292 | OE1    | 2.350        |
| 6NAE   | B_LYS_510 | NZ     | A_GLU_292 | OE2    | 3.768        |
| 6NAE   | B_ARG_559 | NH1    | A_GLU_103 | OE1    | 2.669        |
| 6NAE   | B_ARG_559 | NH1    | A_GLU_103 | OE2    | 3.739        |
| 6NAE   | B_ARG_559 | NH2    | A_GLU_103 | OE1    | 3.488        |
| 6NAE   | B_ARG_559 | NH2    | A_GLU_103 | OE2    | 3.068        |

Table 70: 6NAE-specific interfacial salt bridging network analysis. In this table, the residue naming scheme is **Chain ID\_residue name\_residue number**

| PDB ID | Residue A | Atom A | Residue B | Atom B | Distance (Å) |
|--------|-----------|--------|-----------|--------|--------------|
| 6QD7   | L_ARG_91  | NH1    | D_GLU_502 | OE1    | 3.607        |
| 6QD7   | H_LYS_65  | NZ     | D_ASP_552 | OD1    | 3.151        |
| 6QD7   | H_LYS_65  | NZ     | D_ASP_552 | OD2    | 3.487        |
| 6QD7   | H_ARG_101 | NH1    | D_GLU_564 | OE1    | 3.838        |
| 6QD7   | H_ARG_101 | NH1    | D_GLU_564 | OE2    | 2.869        |
| 6QD7   | H_ARG_101 | NH2    | D_GLU_502 | OE1    | 3.497        |
| 6QD7   | H_ARG_101 | NH2    | D_GLU_502 | OE2    | 3.635        |
| 6QD7   | H_ARG_101 | NH2    | D_GLU_564 | OE1    | 3.061        |
| 6QD7   | H_ARG_101 | NH2    | D_GLU_564 | OE2    | 3.438        |
| 6QD7   | A_ARG_134 | NH1    | B_GLU_545 | OE2    | 3.138        |
| 6QD7   | B_ARG_559 | NH1    | A_GLU_103 | OE1    | 2.604        |
| 6QD7   | B_ARG_559 | NH1    | A_GLU_103 | OE2    | 3.895        |
| 6QD7   | B_ARG_559 | NH2    | A_GLU_103 | OE1    | 3.220        |
| 6QD7   | B_ARG_559 | NH2    | A_GLU_103 | OE2    | 3.089        |
| 6QD7   | B_LYS_588 | NZ     | A_ASP_47  | OD2    | 3.517        |
| 6QD7   | B_HIS_602 | ND1    | F_GLU_611 | OE2    | 2.318        |
| 6QD7   | C_ARG_134 | NH1    | D_GLU_545 | OE2    | 3.066        |
| 6QD7   | E_ARG_134 | NH1    | F_GLU_545 | OE2    | 2.931        |
| 6QD7   | D_ARG_559 | NH1    | C_GLU_103 | OE1    | 2.624        |
| 6QD7   | D_ARG_559 | NH1    | C_GLU_103 | OE2    | 3.858        |
| 6QD7   | D_ARG_559 | NH2    | C_GLU_103 | OE1    | 3.320        |
| 6QD7   | D_ARG_559 | NH2    | C_GLU_103 | OE2    | 3.132        |
| 6QD7   | D_LYS_588 | NZ     | C_ASP_47  | OD2    | 3.598        |
| 6QD7   | D_HIS_602 | ND1    | B_GLU_611 | OE2    | 2.828        |
| 6QD7   | F_ARG_559 | NH1    | E_GLU_103 | OE1    | 2.462        |
| 6QD7   | F_ARG_559 | NH1    | E_GLU_103 | OE2    | 3.800        |
| 6QD7   | F_ARG_559 | NH2    | E_GLU_103 | OE1    | 3.090        |
| 6QD7   | F_ARG_559 | NH2    | E_GLU_103 | OE2    | 2.951        |
| 6QD7   | F_LYS_588 | NZ     | E_ASP_47  | OD2    | 3.686        |
| 6QD7   | F_HIS_602 | ND1    | D_GLU_611 | OE2    | 2.771        |
| 6QD7   | X_LYS_65  | NZ     | F_ASP_552 | OD1    | 3.082        |
| 6QD7   | X_LYS_65  | NZ     | F_ASP_552 | OD2    | 3.701        |
| 6QD7   | X_ARG_101 | NH1    | F_GLU_564 | OE1    | 3.893        |
| 6QD7   | X_ARG_101 | NH1    | F_GLU_564 | OE2    | 2.816        |
| 6QD7   | X_ARG_101 | NH2    | F_GLU_502 | OE1    | 3.631        |
| 6QD7   | X_ARG_101 | NH2    | F_GLU_502 | OE2    | 3.812        |
| 6QD7   | X_ARG_101 | NH2    | F_GLU_564 | OE1    | 3.108        |
| 6QD7   | X_ARG_101 | NH2    | F_GLU_564 | OE2    | 3.371        |
| 6QD7   | U_LYS_65  | NZ     | B_ASP_552 | OD1    | 2.927        |
| 6QD7   | U_LYS_65  | NZ     | B_ASP_552 | OD2    | 3.579        |
| 6QD7   | U_ARG_101 | NH1    | B_GLU_564 | OE1    | 3.771        |
| 6QD7   | U_ARG_101 | NH1    | B_GLU_564 | OE2    | 2.902        |
| 6QD7   | U_ARG_101 | NH2    | B_GLU_502 | OE1    | 3.404        |
| 6QD7   | U_ARG_101 | NH2    | B_GLU_502 | OE2    | 3.473        |
| 6QD7   | U_ARG_101 | NH2    | B_GLU_564 | OE1    | 3.146        |
| 6QD7   | U_ARG_101 | NH2    | B_GLU_564 | OE2    | 3.609        |
| 6QD7   | Z_ARG_91  | NH1    | F_GLU_502 | OE1    | 3.548        |
| 6QD7   | P_ARG_91  | NH1    | B_GLU_502 | OE1    | 3.467        |

Table 71: 6QD7-specific interfacial salt bridging network analysis. In this table, the residue naming scheme is **Chain ID\_residue name\_residue number**

| PDB ID | Residue A | Atom A | Residue B | Atom B | Distance (Å) |
|--------|-----------|--------|-----------|--------|--------------|
| 6QD8   | Z_ARG_96  | NH1    | W_GLU_51  | OE1    | 3.187        |
| 6QD8   | Z_ARG_96  | NH1    | W_GLU_51  | OE2    | 3.722        |
| 6QD8   | A_ARG_64  | NH2    | B_ASP_522 | OD2    | 3.626        |
| 6QD8   | A_ARG_134 | NH1    | B_GLU_545 | OE2    | 3.117        |
| 6QD8   | Y_ARG_96  | NH1    | Q_GLU_51  | OE1    | 3.080        |
| 6QD8   | Y_ARG_96  | NH1    | Q_GLU_51  | OE2    | 3.529        |
| 6QD8   | B_ARG_559 | NH1    | A_GLU_103 | OE1    | 3.695        |
| 6QD8   | B_ARG_559 | NH1    | A_GLU_103 | OE2    | 2.598        |
| 6QD8   | B_ARG_559 | NH2    | A_GLU_103 | OE1    | 3.315        |
| 6QD8   | B_ARG_559 | NH2    | A_GLU_103 | OE2    | 3.288        |
| 6QD8   | B_HIS_602 | ND1    | F_GLU_611 | OE2    | 3.837        |
| 6QD8   | L_ARG_96  | NH1    | H_GLU_51  | OE1    | 3.060        |
| 6QD8   | L_ARG_96  | NH1    | H_GLU_51  | OE2    | 3.554        |
| 6QD8   | H_ARG_55  | NH1    | B_GLU_564 | OE1    | 2.303        |
| 6QD8   | H_ARG_55  | NH1    | B_GLU_564 | OE2    | 3.666        |
| 6QD8   | C_ARG_64  | NH2    | D_ASP_522 | OD2    | 3.747        |
| 6QD8   | C_ARG_134 | NH1    | D_GLU_545 | OE2    | 2.972        |
| 6QD8   | E_ARG_64  | NH2    | F_ASP_522 | OD2    | 3.901        |
| 6QD8   | E_ARG_134 | NH1    | F_GLU_545 | OE2    | 2.891        |
| 6QD8   | F_ARG_559 | NH1    | E_GLU_103 | OE1    | 3.653        |
| 6QD8   | F_ARG_559 | NH1    | E_GLU_103 | OE2    | 2.383        |
| 6QD8   | F_ARG_559 | NH2    | E_GLU_103 | OE1    | 3.116        |
| 6QD8   | F_ARG_559 | NH2    | E_GLU_103 | OE2    | 2.960        |
| 6QD8   | F_HIS_602 | ND1    | D_GLU_611 | OE2    | 3.980        |
| 6QD8   | D_ARG_559 | NH1    | C_GLU_103 | OE1    | 3.634        |
| 6QD8   | D_ARG_559 | NH1    | C_GLU_103 | OE2    | 2.515        |
| 6QD8   | D_ARG_559 | NH2    | C_GLU_103 | OE1    | 3.283        |
| 6QD8   | D_ARG_559 | NH2    | C_GLU_103 | OE2    | 3.254        |
| 6QD8   | D_HIS_602 | ND1    | B_GLU_611 | OE2    | 3.920        |
| 6QD8   | W_ARG_55  | NH1    | F_GLU_564 | OE1    | 2.296        |
| 6QD8   | W_ARG_55  | NH1    | F_GLU_564 | OE2    | 3.607        |
| 6QD8   | Q_ARG_55  | NH1    | D_GLU_564 | OE1    | 2.265        |
| 6QD8   | Q_ARG_55  | NH1    | D_GLU_564 | OE2    | 3.539        |

Table 72: 6QD8-specific interfacial salt bridging network analysis. In this table, the residue naming scheme is **Chain ID\_residue name\_residue number**

| PDB ID | Residue A | Atom A | Residue B | Atom B | Distance (Å) |
|--------|-----------|--------|-----------|--------|--------------|
| 6S8D   | H_ARG_30  | NH2    | P_ASP_104 | OD2    | 3.844        |
| 6S8D   | B_ARG_559 | NH1    | A_GLU_103 | OE1    | 3.375        |
| 6S8D   | B_ARG_559 | NH1    | A_GLU_103 | OE2    | 3.357        |
| 6S8D   | B_ARG_559 | NH2    | A_GLU_103 | OE1    | 3.329        |
| 6S8D   | B_ARG_596 | NH2    | A_ASP_55  | OD2    | 3.730        |
| 6S8D   | D_ARG_559 | NH1    | C_GLU_103 | OE1    | 3.344        |
| 6S8D   | D_ARG_559 | NH1    | C_GLU_103 | OE2    | 3.304        |
| 6S8D   | D_ARG_559 | NH2    | C_GLU_103 | OE1    | 3.261        |
| 6S8D   | D_ARG_559 | NH2    | C_GLU_103 | OE2    | 3.986        |
| 6S8D   | D_ARG_596 | NH2    | C_ASP_55  | OD2    | 3.794        |
| 6S8D   | F_ARG_559 | NH1    | E_GLU_103 | OE1    | 3.445        |
| 6S8D   | F_ARG_559 | NH1    | E_GLU_103 | OE2    | 3.366        |
| 6S8D   | F_ARG_559 | NH2    | E_GLU_103 | OE1    | 3.372        |
| 6S8D   | F_ARG_596 | NH2    | E_ASP_55  | OD2    | 3.605        |
| 6S8D   | E_LYS_114 | NZ     | Y_ASP_56  | OD2    | 3.842        |
| 6S8D   | P_ARG_30  | NH2    | Y_ASP_104 | OD2    | 3.808        |
| 6S8D   | Y_ARG_30  | NH2    | H_ASP_104 | OD2    | 3.626        |

Table 73: 6S8D-specific interfacial salt bridging network analysis. In this table, the residue naming scheme is **Chain ID\_residue name\_residue number**

| PDB ID | Residue A | Atom A | Residue B | Atom B | Distance (Å) |
|--------|-----------|--------|-----------|--------|--------------|
| 6S8I   | H_ARG_105 | NH1    | L_GLU_102 | OE1    | 3.601        |
| 6S8I   | H_ARG_105 | NH1    | L_GLU_102 | OE2    | 3.239        |
| 6S8I   | H_ARG_105 | NH2    | L_GLU_102 | OE2    | 2.950        |
| 6S8I   | A_LYS_114 | NZ     | H_ASP_56  | OD1    | 2.454        |
| 6S8I   | A_LYS_114 | NZ     | H_ASP_56  | OD2    | 2.783        |
| 6S8I   | A_ARG_134 | NH1    | B_GLU_545 | OE2    | 3.078        |
| 6S8I   | B_ARG_559 | NH1    | A_GLU_103 | OE1    | 3.895        |
| 6S8I   | B_ARG_559 | NH1    | A_GLU_103 | OE2    | 3.783        |
| 6S8I   | B_ARG_559 | NH2    | A_GLU_103 | OE1    | 3.282        |
| 6S8I   | B_ARG_559 | NH2    | A_GLU_103 | OE2    | 3.928        |
| 6S8I   | B_ARG_596 | NH2    | A_ASP_55  | OD1    | 3.671        |
| 6S8I   | D_ARG_559 | NH1    | C_GLU_103 | OE1    | 3.877        |
| 6S8I   | D_ARG_559 | NH1    | C_GLU_103 | OE2    | 3.822        |
| 6S8I   | D_ARG_559 | NH2    | C_GLU_103 | OE1    | 3.248        |
| 6S8I   | D_ARG_559 | NH2    | C_GLU_103 | OE2    | 3.953        |
| 6S8I   | D_ARG_596 | NH2    | C_ASP_55  | OD1    | 3.743        |
| 6S8I   | F_ARG_559 | NH1    | E_GLU_103 | OE1    | 3.975        |
| 6S8I   | F_ARG_559 | NH1    | E_GLU_103 | OE2    | 3.796        |
| 6S8I   | F_ARG_559 | NH2    | E_GLU_103 | OE1    | 3.335        |
| 6S8I   | F_ARG_559 | NH2    | E_GLU_103 | OE2    | 3.908        |
| 6S8I   | F_ARG_596 | NH2    | E_ASP_55  | OD1    | 3.553        |
| 6S8I   | C_LYS_114 | NZ     | P_ASP_56  | OD1    | 2.515        |
| 6S8I   | C_LYS_114 | NZ     | P_ASP_56  | OD2    | 2.783        |
| 6S8I   | C_ARG_134 | NH1    | D_GLU_545 | OE2    | 3.135        |
| 6S8I   | E_LYS_114 | NZ     | Y_ASP_56  | OD1    | 2.476        |
| 6S8I   | E_LYS_114 | NZ     | Y_ASP_56  | OD2    | 2.735        |
| 6S8I   | E_ARG_134 | NH1    | F_GLU_545 | OE2    | 3.154        |
| 6S8I   | P_ARG_105 | NH1    | O_GLU_102 | OE1    | 3.789        |
| 6S8I   | P_ARG_105 | NH1    | O_GLU_102 | OE2    | 3.289        |
| 6S8I   | P_ARG_105 | NH2    | O_GLU_102 | OE2    | 3.143        |
| 6S8I   | Y_ARG_105 | NH1    | U_GLU_102 | OE1    | 3.606        |
| 6S8I   | Y_ARG_105 | NH1    | U_GLU_102 | OE2    | 3.273        |
| 6S8I   | Y_ARG_105 | NH2    | U_GLU_102 | OE2    | 2.978        |

Table 74: 6S8I-specific interfacial salt bridging network analysis. In this table, the residue naming scheme is **Chain ID\_residue name\_residue number**

| PDB ID | Residue A | Atom A | Residue B | Atom B | Distance (Å) |
|--------|-----------|--------|-----------|--------|--------------|
| 6S8J   | A_LYS_114 | NZ     | H_ASP_56  | OD1    | 3.168        |
| 6S8J   | A_LYS_114 | NZ     | H_ASP_56  | OD2    | 2.312        |
| 6S8J   | A_ARG_134 | NH1    | B_GLU_545 | OE2    | 2.814        |
| 6S8J   | B_ARG_559 | NH1    | A_GLU_103 | OE1    | 3.955        |
| 6S8J   | B_ARG_559 | NH1    | A_GLU_103 | OE2    | 3.604        |
| 6S8J   | B_ARG_559 | NH2    | A_GLU_103 | OE1    | 3.443        |
| 6S8J   | B_ARG_559 | NH2    | A_GLU_103 | OE2    | 3.830        |
| 6S8J   | B_ARG_596 | NH2    | A_ASP_55  | OD1    | 2.986        |
| 6S8J   | B_ARG_596 | NH2    | A_ASP_55  | OD2    | 3.529        |
| 6S8J   | D_ARG_559 | NH1    | C_GLU_103 | OE1    | 3.872        |
| 6S8J   | D_ARG_559 | NH1    | C_GLU_103 | OE2    | 3.635        |
| 6S8J   | D_ARG_559 | NH2    | C_GLU_103 | OE1    | 3.272        |
| 6S8J   | D_ARG_559 | NH2    | C_GLU_103 | OE2    | 3.792        |
| 6S8J   | D_ARG_596 | NH2    | C_ASP_55  | OD1    | 2.928        |
| 6S8J   | D_ARG_596 | NH2    | C_ASP_55  | OD2    | 3.762        |
| 6S8J   | D_HIS_602 | ND1    | B_GLU_611 | OE1    | 3.866        |
| 6S8J   | D_HIS_602 | NE2    | B_GLU_611 | OE1    | 3.805        |
| 6S8J   | D_HIS_602 | NE2    | B_GLU_611 | OE2    | 3.737        |
| 6S8J   | F_ARG_559 | NH1    | E_GLU_103 | OE1    | 3.993        |
| 6S8J   | F_ARG_559 | NH1    | E_GLU_103 | OE2    | 3.748        |
| 6S8J   | F_ARG_559 | NH2    | E_GLU_103 | OE1    | 3.468        |
| 6S8J   | F_ARG_559 | NH2    | E_GLU_103 | OE2    | 3.952        |
| 6S8J   | F_ARG_596 | NH2    | E_ASP_55  | OD1    | 2.985        |
| 6S8J   | F_ARG_596 | NH2    | E_ASP_55  | OD2    | 3.707        |
| 6S8J   | F_HIS_602 | ND1    | D_GLU_611 | OE1    | 3.880        |
| 6S8J   | F_HIS_602 | NE2    | D_GLU_611 | OE2    | 3.765        |
| 6S8J   | C_LYS_114 | NZ     | P_ASP_56  | OD1    | 3.173        |
| 6S8J   | C_LYS_114 | NZ     | P_ASP_56  | OD2    | 2.252        |
| 6S8J   | C_ARG_134 | NH1    | D_GLU_545 | OE2    | 2.837        |
| 6S8J   | E_LYS_114 | NZ     | Y_ASP_56  | OD1    | 3.177        |
| 6S8J   | E_LYS_114 | NZ     | Y_ASP_56  | OD2    | 2.185        |
| 6S8J   | E_ARG_134 | NH1    | F_GLU_545 | OE2    | 2.997        |

Table 75: 6S8J-specific interfacial salt bridging network analysis. In this table, the residue naming scheme is **Chain ID\_residue name\_residue number**

| PDB         | Acceptor (A) | Donor (D)   | Hydrogen (H) | D-A (Å) | H-A (Å) | $\angle ADH(^{\circ})$ |
|-------------|--------------|-------------|--------------|---------|---------|------------------------|
| 2RLJ-1.PDB  | O, A_ILE_9   | N, A_PHE_12 | H, A_PHE_12  | 2.51    | 1.63    | 20.85                  |
| 2RLJ-11.PDB | O, A_TRP_8   | N, A_TYR_11 | H, A_TYR_11  | 2.98    | 2.09    | 19.25                  |
| 2RLJ-11.PDB | O, A_ILE_9   | N, A_PHE_12 | H, A_PHE_12  | 2.62    | 1.69    | 14.63                  |
| 2RLJ-12.PDB | O, A_ILE_9   | N, A_PHE_12 | H, A_PHE_12  | 2.59    | 1.69    | 19.30                  |
| 2RLJ-13.PDB | O, A_ILE_9   | N, A_PHE_12 | H, A_PHE_12  | 2.63    | 1.78    | 24.81                  |
| 2RLJ-14.PDB | O, A_ILE_9   | N, A_PHE_12 | H, A_PHE_12  | 2.58    | 1.62    | 8.91                   |
| 2RLJ-15.PDB | O, A_ILE_9   | N, A_PHE_12 | H, A_PHE_12  | 2.58    | 1.69    | 20.08                  |
| 2RLJ-16.PDB | O, A_ILE_9   | N, A_GLY_13 | H, A_GLY_13  | 2.99    | 2.03    | 10.52                  |
| 2RLJ-19.PDB | O, A_ILE_9   | N, A_PHE_12 | H, A_PHE_12  | 2.73    | 1.89    | 26.29                  |

Table 76: 2RLJ-1-specific side chain and main chain hydrogen bonding analysis. In this table, a PDB file is specified with a four-letter PDB ID, except that the names of the PDB files corresponding to the single NMR structural model split from the NMR ensemble is specified with a four-letter PDB ID in addition to a hyphen followed by the single NMR structural model numeric ID, the residue naming scheme is **Chain ID\_residue name\_residue number**,  $\angle ADH$  represents the angle formed by acceptor (A), donor (D) and hydrogen (H) ( $\angle ADH$ ).

| PDB         | Acceptor (A) | Donor (D)   | Hydrogen (H) | D-A (Å) | H-A (Å) | $\angle ADH(^{\circ})$ |
|-------------|--------------|-------------|--------------|---------|---------|------------------------|
| 2RLJ-11.PDB | O, A_TRP_8   | N, A_TYR_11 | H, A_TYR_11  | 2.98    | 2.09    | 19.25                  |
| 2RLJ-11.PDB | O, A_ILE_9   | N, A_PHE_12 | H, A_PHE_12  | 2.62    | 1.69    | 14.63                  |

Table 77: 2RLJ-11-specific side chain and main chain hydrogen bonding analysis. In this table, a PDB file is specified with a four-letter PDB ID, except that the names of the PDB files corresponding to the single NMR structural model split from the NMR ensemble is specified with a four-letter PDB ID in addition to a hyphen followed by the single NMR structural model numeric ID, the residue naming scheme is **Chain ID\_residue name\_residue number**,  $\angle ADH$  represents the angle formed by acceptor (A), donor (D) and hydrogen (H) ( $\angle ADH$ ).

| PDB         | Acceptor (A) | Donor (D)   | Hydrogen (H) | D-A (Å) | H-A (Å) | $\angle ADH(^{\circ})$ |
|-------------|--------------|-------------|--------------|---------|---------|------------------------|
| 2RLJ-12.PDB | O, A.ILE_9   | N, A.PHE_12 | H, A.PHE_12  | 2.59    | 1.69    | 19.30                  |

Table 78: 2RLJ-12-specific side chain and main chain hydrogen bonding analysis. In this table, a PDB file is specified with a four-letter PDB ID, except that the names of the PDB files corresponding to the single NMR structural model split from the NMR ensemble is specified with a four-letter PDB ID in addition to a hyphen followed by the single NMR structural model numeric ID, the residue naming scheme is **Chain ID\_residue name\_residue number**,  $\angle ADH$  represents the angle formed by acceptor (A), donor (D) and hydrogen (H) ( $\angle ADH$ ).

| PDB         | Acceptor (A) | Donor (D)   | Hydrogen (H) | D-A (Å) | H-A (Å) | $\angle ADH(^{\circ})$ |
|-------------|--------------|-------------|--------------|---------|---------|------------------------|
| 2RLJ-13.PDB | O, A.ILE_9   | N, A.PHE_12 | H, A.PHE_12  | 2.63    | 1.78    | 24.81                  |

Table 79: 2RLJ-13-specific side chain and main chain hydrogen bonding analysis. In this table, a PDB file is specified with a four-letter PDB ID, except that the names of the PDB files corresponding to the single NMR structural model split from the NMR ensemble is specified with a four-letter PDB ID in addition to a hyphen followed by the single NMR structural model numeric ID, the residue naming scheme is **Chain ID\_residue name\_residue number**,  $\angle ADH$  represents the angle formed by acceptor (A), donor (D) and hydrogen (H) ( $\angle ADH$ ).

| PDB         | Acceptor (A) | Donor (D)   | Hydrogen (H) | D-A (Å) | H-A (Å) | $\angle ADH(^{\circ})$ |
|-------------|--------------|-------------|--------------|---------|---------|------------------------|
| 2RLJ-14.PDB | O, A.ILE_9   | N, A.PHE_12 | H, A.PHE_12  | 2.58    | 1.62    | 8.91                   |

Table 80: 2RLJ-14-specific side chain and main chain hydrogen bonding analysis. In this table, a PDB file is specified with a four-letter PDB ID, except that the names of the PDB files corresponding to the single NMR structural model split from the NMR ensemble is specified with a four-letter PDB ID in addition to a hyphen followed by the single NMR structural model numeric ID, the residue naming scheme is **Chain ID\_residue name\_residue number**,  $\angle ADH$  represents the angle formed by acceptor (A), donor (D) and hydrogen (H) ( $\angle ADH$ ).

| PDB         | Acceptor (A) | Donor (D)   | Hydrogen (H) | D-A (Å) | H-A (Å) | $\angle ADH(^{\circ})$ |
|-------------|--------------|-------------|--------------|---------|---------|------------------------|
| 2RLJ-15.PDB | O, A.ILE_9   | N, A.PHE_12 | H, A.PHE_12  | 2.58    | 1.69    | 20.08                  |

Table 81: 2RLJ-15-specific side chain and main chain hydrogen bonding analysis. In this table, a PDB file is specified with a four-letter PDB ID, except that the names of the PDB files corresponding to the single NMR structural model split from the NMR ensemble is specified with a four-letter PDB ID in addition to a hyphen followed by the single NMR structural model numeric ID, the residue naming scheme is **Chain ID\_residue name\_residue number**,  $\angle ADH$  represents the angle formed by acceptor (A), donor (D) and hydrogen (H) ( $\angle ADH$ ).

| PDB         | Acceptor (A) | Donor (D)   | Hydrogen (H) | D-A (Å) | H-A (Å) | $\angle ADH(^{\circ})$ |
|-------------|--------------|-------------|--------------|---------|---------|------------------------|
| 2RLJ-16.PDB | O, A_ILE_9   | N, A_GLY_13 | H, A_GLY_13  | 2.99    | 2.03    | 10.52                  |

Table 82: 2RLJ-16-specific side chain and main chain hydrogen bonding analysis. In this table, a PDB file is specified with a four-letter PDB ID, except that the names of the PDB files corresponding to the single NMR structural model split from the NMR ensemble is specified with a four-letter PDB ID in addition to a hyphen followed by the single NMR structural model numeric ID, the residue naming scheme is **Chain ID\_residue name\_residue number**,  $\angle ADH$  represents the angle formed by acceptor (A), donor (D) and hydrogen (H) ( $\angle ADH$ ).

| PDB         | Acceptor (A) | Donor (D)   | Hydrogen (H) | D-A (Å) | H-A (Å) | $\angle ADH(^{\circ})$ |
|-------------|--------------|-------------|--------------|---------|---------|------------------------|
| 2RLJ-19.PDB | O, A.ILE_9   | N, A.PHE_12 | H, A.PHE_12  | 2.73    | 1.89    | 26.29                  |

Table 83: 2RLJ-19-specific side chain and main chain hydrogen bonding analysis. In this table, a PDB file is specified with a four-letter PDB ID, except that the names of the PDB files corresponding to the single NMR structural model split from the NMR ensemble is specified with a four-letter PDB ID in addition to a hyphen followed by the single NMR structural model numeric ID, the residue naming scheme is **Chain ID\_residue name\_residue number**,  $\angle ADH$  represents the angle formed by acceptor (A), donor (D) and hydrogen (H) ( $\angle ADH$ ).

| PDB        | Acceptor (A) | Donor (D)   | Hydrogen (H) | D-A (Å) | H-A (Å) | $\angle ADH(^{\circ})$ |
|------------|--------------|-------------|--------------|---------|---------|------------------------|
| 2RLJ-2.PDB | O, A_ILE_9   | N, A_PHE_12 | H, A_PHE_12  | 2.58    | 1.69    | 19.33                  |

Table 84: 2RLJ-2-specific side chain and main chain hydrogen bonding analysis. In this table, a PDB file is specified with a four-letter PDB ID, except that the names of the PDB files corresponding to the single NMR structural model split from the NMR ensemble is specified with a four-letter PDB ID in addition to a hyphen followed by the single NMR structural model numeric ID, the residue naming scheme is **Chain ID\_residue name\_residue number**,  $\angle ADH$  represents the angle formed by acceptor (A), donor (D) and hydrogen (H) ( $\angle ADH$ ).

| PDB        | Acceptor (A) | Donor (D)   | Hydrogen (H) | D-A (Å) | H-A (Å) | $\angle ADH(^{\circ})$ |
|------------|--------------|-------------|--------------|---------|---------|------------------------|
| 2RLJ-3.PDB | O, A_ILE_9   | N, A_PHE_12 | H, A_PHE_12  | 2.54    | 1.66    | 20.38                  |

Table 85: 2RLJ-3-specific side chain and main chain hydrogen bonding analysis. In this table, a PDB file is specified with a four-letter PDB ID, except that the names of the PDB files corresponding to the single NMR structural model split from the NMR ensemble is specified with a four-letter PDB ID in addition to a hyphen followed by the single NMR structural model numeric ID, the residue naming scheme is **Chain ID\_residue name\_residue number**,  $\angle ADH$  represents the angle formed by acceptor (A), donor (D) and hydrogen (H) ( $\angle ADH$ ).

| PDB        | Acceptor (A) | Donor (D)   | Hydrogen (H) | D-A (Å) | H-A (Å) | $\angle ADH(^{\circ})$ |
|------------|--------------|-------------|--------------|---------|---------|------------------------|
| 2RLJ-4.PDB | O, A_TRP_8   | N, A_TYR_11 | H, A_TYR_11  | 2.94    | 2.08    | 23.85                  |

Table 86: 2RLJ-4-specific side chain and main chain hydrogen bonding analysis. In this table, a PDB file is specified with a four-letter PDB ID, except that the names of the PDB files corresponding to the single NMR structural model split from the NMR ensemble is specified with a four-letter PDB ID in addition to a hyphen followed by the single NMR structural model numeric ID, the residue naming scheme is **Chain ID\_residue name\_residue number**,  $\angle ADH$  represents the angle formed by acceptor (A), donor (D) and hydrogen (H) ( $\angle ADH$ ).

| PDB        | Acceptor (A) | Donor (D)   | Hydrogen (H) | D-A (Å) | H-A (Å) | $\angle ADH(^{\circ})$ |
|------------|--------------|-------------|--------------|---------|---------|------------------------|
| 2RLJ-5.PDB | O, A_ILE_9   | N, A_PHE_12 | H, A_PHE_12  | 2.60    | 1.76    | 25.80                  |
| 2RLJ-5.PDB | O, A_PRO_10  | N, A_GLY_13 | H, A_GLY_13  | 2.75    | 1.88    | 22.12                  |

Table 87: 2RLJ-5-specific side chain and main chain hydrogen bonding analysis. In this table, a PDB file is specified with a four-letter PDB ID, except that the names of the PDB files corresponding to the single NMR structural model split from the NMR ensemble is specified with a four-letter PDB ID in addition to a hyphen followed by the single NMR structural model numeric ID, the residue naming scheme is **Chain ID\_residue name\_residue number**,  $\angle ADH$  represents the angle formed by acceptor (A), donor (D) and hydrogen (H) ( $\angle ADH$ ).

| PDB        | Acceptor (A) | Donor (D)   | Hydrogen (H) | D-A (Å) | H-A (Å) | $\angle ADH(^{\circ})$ |
|------------|--------------|-------------|--------------|---------|---------|------------------------|
| 2RLJ-6.PDB | O, A_ILE_9   | N, A_PHE_12 | H, A_PHE_12  | 2.54    | 1.66    | 20.70                  |

Table 88: 2RLJ-6-specific side chain and main chain hydrogen bonding analysis. In this table, a PDB file is specified with a four-letter PDB ID, except that the names of the PDB files corresponding to the single NMR structural model split from the NMR ensemble is specified with a four-letter PDB ID in addition to a hyphen followed by the single NMR structural model numeric ID, the residue naming scheme is **Chain ID\_residue name\_residue number**,  $\angle ADH$  represents the angle formed by acceptor (A), donor (D) and hydrogen (H) ( $\angle ADH$ ).

| PDB        | Acceptor (A) | Donor (D)   | Hydrogen (H) | D-A (Å) | H-A (Å) | $\angle ADH(^{\circ})$ |
|------------|--------------|-------------|--------------|---------|---------|------------------------|
| 2RLJ-7.PDB | O, A_ILE_9   | N, A_PHE_12 | H, A_PHE_12  | 2.71    | 1.84    | 22.67                  |

Table 89: 2RLJ-7-specific side chain and main chain hydrogen bonding analysis. In this table, a PDB file is specified with a four-letter PDB ID, except that the names of the PDB files corresponding to the single NMR structural model split from the NMR ensemble is specified with a four-letter PDB ID in addition to a hyphen followed by the single NMR structural model numeric ID, the residue naming scheme is **Chain ID\_residue name\_residue number**,  $\angle ADH$  represents the angle formed by acceptor (A), donor (D) and hydrogen (H) ( $\angle ADH$ ).

| PDB        | Acceptor (A) | Donor (D)   | Hydrogen (H) | D-A (Å) | H-A (Å) | $\angle ADH(^{\circ})$ |
|------------|--------------|-------------|--------------|---------|---------|------------------------|
| 2RLJ-9.PDB | O, A_ILE_9   | N, A_PHE_12 | H, A_PHE_12  | 2.57    | 1.64    | 13.83                  |

Table 90: 2RLJ-9-specific side chain and main chain hydrogen bonding analysis. In this table, a PDB file is specified with a four-letter PDB ID, except that the names of the PDB files corresponding to the single NMR structural model split from the NMR ensemble is specified with a four-letter PDB ID in addition to a hyphen followed by the single NMR structural model numeric ID, the residue naming scheme is **Chain ID\_residue name\_residue number**,  $\angle ADH$  represents the angle formed by acceptor (A), donor (D) and hydrogen (H) ( $\angle ADH$ ).

| PDB      | Acceptor (A)  | Donor (D)    | Hydrogen (H) | D-A (Å) | H-A (Å) | $\angle ADH(^{\circ})$ |
|----------|---------------|--------------|--------------|---------|---------|------------------------|
| 5HJ3.PDB | O, C_ALA_166  | N, C_VAL_97  | H, C_VAL_97  | 2.93    | 2.10    | 12.03                  |
| 5HJ3.PDB | O, C_VAL_97   | N, C_ALA_166 | H, C_ALA_166 | 2.88    | 2.11    | 22.07                  |
| 5HJ3.PDB | O, C_LEU_68   | N, C_VAL_180 | H, C_VAL_180 | 2.78    | 1.98    | 17.26                  |
| 5HJ3.PDB | O, C_VAL_66   | N, C_ALA_182 | H, C_ALA_182 | 2.79    | 1.96    | 12.90                  |
| 5HJ3.PDB | OE1, J_GLN_89 | OH, J_TYR_36 | HH, J_TYR_36 | 2.57    | 1.82    | 22.55                  |
| 5HJ3.PDB | O, A_SER_49   | N, A_TRP_36  | H, A_TRP_36  | 2.98    | 2.17    | 16.41                  |
| 5HJ3.PDB | O, A_TYR_91   | N, A_VAL_37  | H, A_VAL_37  | 2.94    | 2.09    | 8.77                   |
| 5HJ3.PDB | O, A_LEU_20   | N, A_LEU_80  | H, A_LEU_80  | 2.97    | 2.16    | 16.17                  |
| 5HJ3.PDB | O, A_VAL_37   | N, A_TYR_91  | H, A_TYR_91  | 2.58    | 1.73    | 5.25                   |
| 5HJ3.PDB | O, A_ASN_35   | N, A_VAL_93  | H, A_VAL_93  | 3.00    | 2.19    | 17.25                  |

Table 91: 5HJ3-specific side chain and main chain hydrogen bonding analysis. In this table, a PDB file is specified with a four-letter PDB ID, except that the names of the PDB files corresponding to the single NMR structural model split from the NMR ensemble is specified with a four-letter PDB ID in addition to a hyphen followed by the single NMR structural model numeric ID, the residue naming scheme is **Chain ID\_residue name\_residue number**,  $\angle ADH$  represents the angle formed by acceptor (A), donor (D) and hydrogen (H) ( $\angle ADH$ ).

| PDB         | Acceptor (A) | Donor (D)    | Hydrogen (H) | D-A (Å) | H-A (Å) | $\angle ADH(^{\circ})$ |
|-------------|--------------|--------------|--------------|---------|---------|------------------------|
| 5T42-1.PDB  | O, A_GLY.657 | N, A_VAL.662 | H, A_VAL.662 | 2.93    | 1.95    | 0.17                   |
| 5T42-1.PDB  | O, A_VAL.661 | N, A_VAL.665 | H, A_VAL.665 | 2.67    | 1.78    | 19.27                  |
| 5T42-1.PDB  | O, A_VAL.662 | N, A_ILE.666 | H, A_ILE.666 | 2.87    | 1.99    | 20.76                  |
| 5T42-1.PDB  | O, A_ILE.666 | N, A_ALA.670 | H, A_ALA.670 | 2.47    | 1.56    | 18.05                  |
| 5T42-1.PDB  | O, A_LEU.668 | N, A_ILE.671 | H, A_ILE.671 | 2.60    | 1.70    | 18.73                  |
| 5T42-1.PDB  | O, A_ILE.671 | N, A_VAL.675 | H, A_VAL.675 | 2.59    | 1.66    | 14.81                  |
| 5T42-10.PDB | O, A_ASP.642 | N, A_TRP.645 | H, A_TRP.645 | 2.99    | 2.02    | 8.43                   |
| 5T42-10.PDB | O, A_GLY.647 | N, A_GLN.650 | H, A_GLN.650 | 2.93    | 2.13    | 29.57                  |
| 5T42-10.PDB | O, A_GLY.657 | N, A_VAL.661 | H, A_VAL.661 | 2.94    | 2.13    | 28.24                  |
| 5T42-10.PDB | O, A_VAL.661 | N, A_VAL.665 | H, A_VAL.665 | 2.69    | 1.77    | 16.79                  |
| 5T42-10.PDB | O, A_VAL.662 | N, A_ILE.666 | H, A_ILE.666 | 3.00    | 2.20    | 29.07                  |
| 5T42-10.PDB | O, A_ILE.663 | N, A_ALA.667 | H, A_ALA.667 | 2.81    | 2.01    | 29.53                  |
| 5T42-10.PDB | O, A_ILE.666 | N, A_ALA.670 | H, A_ALA.670 | 2.49    | 1.58    | 17.30                  |
| 5T42-10.PDB | O, A_LEU.668 | N, A_ILE.671 | H, A_ILE.671 | 2.61    | 1.69    | 15.97                  |
| 5T42-10.PDB | O, A_ILE.671 | N, A_VAL.675 | H, A_VAL.675 | 2.56    | 1.64    | 15.53                  |
| 5T42-11.PDB | O, A_GLY.657 | N, A_VAL.662 | H, A_VAL.662 | 2.81    | 1.85    | 11.13                  |
| 5T42-11.PDB | O, A_VAL.661 | N, A_VAL.665 | H, A_VAL.665 | 2.82    | 1.97    | 23.92                  |
| 5T42-11.PDB | O, A_VAL.662 | N, A_ILE.666 | H, A_ILE.666 | 2.70    | 1.78    | 16.16                  |
| 5T42-11.PDB | O, A_ILE.666 | N, A_ALA.670 | H, A_ALA.670 | 2.48    | 1.60    | 20.64                  |
| 5T42-11.PDB | O, A_LEU.668 | N, A_ILE.671 | H, A_ILE.671 | 2.64    | 1.75    | 19.83                  |
| 5T42-11.PDB | O, A_ILE.671 | N, A_VAL.675 | H, A_VAL.675 | 2.54    | 1.62    | 15.58                  |
| 5T42-12.PDB | O, A_ASP.642 | N, A_TRP.645 | H, A_TRP.645 | 2.97    | 2.01    | 7.30                   |
| 5T42-12.PDB | O, A_GLY.657 | N, A_VAL.662 | H, A_VAL.662 | 2.85    | 1.89    | 9.61                   |
| 5T42-12.PDB | O, A_VAL.661 | N, A_VAL.665 | H, A_VAL.665 | 2.71    | 1.80    | 16.55                  |
| 5T42-12.PDB | O, A_ILE.663 | N, A_ALA.667 | H, A_ALA.667 | 2.92    | 2.10    | 27.43                  |
| 5T42-12.PDB | O, A_ILE.666 | N, A_ALA.670 | H, A_ALA.670 | 2.49    | 1.61    | 19.85                  |
| 5T42-12.PDB | O, A_LEU.668 | N, A_ILE.671 | H, A_ILE.671 | 2.64    | 1.74    | 18.61                  |
| 5T42-12.PDB | O, A_ALA.672 | N, A_PHE.676 | H, A_PHE.676 | 2.50    | 1.65    | 23.17                  |
| 5T42-13.PDB | O, A_GLY.657 | N, A_VAL.662 | H, A_VAL.662 | 2.59    | 1.66    | 14.08                  |
| 5T42-13.PDB | O, A_VAL.661 | N, A_VAL.665 | H, A_VAL.665 | 2.67    | 1.78    | 19.44                  |
| 5T42-13.PDB | O, A_VAL.662 | N, A_ILE.666 | H, A_ILE.666 | 2.94    | 2.05    | 20.83                  |
| 5T42-13.PDB | O, A_ILE.666 | N, A_ALA.670 | H, A_ALA.670 | 2.45    | 1.56    | 19.27                  |
| 5T42-13.PDB | O, A_LEU.668 | N, A_ILE.671 | H, A_ILE.671 | 2.61    | 1.69    | 16.98                  |
| 5T42-13.PDB | O, A_ILE.671 | N, A_VAL.675 | H, A_VAL.675 | 2.57    | 1.62    | 12.60                  |
| 5T42-14.PDB | O, A_ASP.642 | N, A_TRP.645 | H, A_TRP.645 | 2.95    | 1.98    | 4.18                   |
| 5T42-14.PDB | O, A_GLY.657 | N, A_VAL.662 | H, A_VAL.662 | 2.91    | 1.94    | 7.26                   |
| 5T42-14.PDB | O, A_VAL.661 | N, A_VAL.665 | H, A_VAL.665 | 2.68    | 1.76    | 16.51                  |
| 5T42-14.PDB | O, A_ILE.663 | N, A_ALA.667 | H, A_ALA.667 | 2.87    | 2.08    | 29.84                  |
| 5T42-14.PDB | O, A_ILE.666 | N, A_ALA.670 | H, A_ALA.670 | 2.48    | 1.60    | 19.90                  |
| 5T42-14.PDB | O, A_LEU.668 | N, A_ILE.671 | H, A_ILE.671 | 2.65    | 1.74    | 18.08                  |
| 5T42-14.PDB | O, A_ILE.671 | N, A_VAL.675 | H, A_VAL.675 | 2.56    | 1.62    | 13.44                  |
| 5T42-15.PDB | O, A_GLY.657 | N, A_VAL.662 | H, A_VAL.662 | 2.70    | 1.74    | 9.57                   |
| 5T42-15.PDB | O, A_VAL.661 | N, A_VAL.665 | H, A_VAL.665 | 2.66    | 1.78    | 20.70                  |
| 5T42-15.PDB | O, A_VAL.662 | N, A_ILE.666 | H, A_ILE.666 | 2.88    | 2.00    | 21.01                  |
| 5T42-15.PDB | O, A_ILE.666 | N, A_ALA.670 | H, A_ALA.670 | 2.47    | 1.58    | 19.25                  |
| 5T42-15.PDB | O, A_LEU.668 | N, A_ILE.671 | H, A_ILE.671 | 2.62    | 1.73    | 20.10                  |
| 5T42-15.PDB | O, A_ILE.671 | N, A_VAL.675 | H, A_VAL.675 | 2.59    | 1.64    | 13.08                  |
| 5T42-16.PDB | O, A_GLY.657 | N, A_VAL.661 | H, A_VAL.661 | 2.96    | 2.14    | 27.44                  |
| 5T42-16.PDB | O, A_VAL.661 | N, A_VAL.665 | H, A_VAL.665 | 2.75    | 1.84    | 17.63                  |
| 5T42-16.PDB | O, A_VAL.662 | N, A_ILE.666 | H, A_ILE.666 | 2.97    | 2.15    | 27.18                  |
| 5T42-16.PDB | O, A_ILE.663 | N, A_ALA.667 | H, A_ALA.667 | 2.86    | 2.06    | 29.61                  |
| 5T42-16.PDB | O, A_ILE.666 | N, A_ALA.670 | H, A_ALA.670 | 2.49    | 1.61    | 20.21                  |
| 5T42-16.PDB | O, A_LEU.668 | N, A_ILE.671 | H, A_ILE.671 | 2.65    | 1.73    | 16.77                  |
| 5T42-16.PDB | O, A_ILE.671 | N, A_VAL.675 | H, A_VAL.675 | 2.52    | 1.56    | 10.87                  |
| 5T42-17.PDB | O, A_ASN.641 | N, A_TRP.644 | H, A_TRP.644 | 2.88    | 1.91    | 6.60                   |
| 5T42-17.PDB | O, A_GLY.647 | N, A_GLN.650 | H, A_GLN.650 | 2.78    | 1.97    | 27.65                  |
| 5T42-17.PDB | O, A_VAL.661 | N, A_VAL.665 | H, A_VAL.665 | 2.63    | 1.72    | 16.57                  |

|             |              |                |                 |      |      |       |
|-------------|--------------|----------------|-----------------|------|------|-------|
| 5T42-17.PDB | O, A_ILE.663 | N, A_ALA.667   | H, A_ALA.667    | 2.81 | 2.02 | 29.77 |
| 5T42-17.PDB | O, A_ILE.666 | N, A_ALA.670   | H, A_ALA.670    | 2.49 | 1.62 | 21.02 |
| 5T42-17.PDB | O, A_LEU.668 | N, A_ILE.671   | H, A_ILE.671    | 2.63 | 1.72 | 18.50 |
| 5T42-17.PDB | O, A_ALA.672 | N, A_PHE.676   | H, A_PHE.676    | 2.50 | 1.66 | 24.43 |
| 5T42-18.PDB | O, A_TRP.644 | NH1, A_ARG.649 | HH11, A_ARG.649 | 2.95 | 2.14 | 29.60 |
| 5T42-18.PDB | O, A_GLY.657 | N, A_VAL.662   | H, A_VAL.662    | 2.77 | 1.80 | 7.61  |
| 5T42-18.PDB | O, A_VAL.661 | N, A_VAL.665   | H, A_VAL.665    | 2.78 | 1.94 | 24.62 |
| 5T42-18.PDB | O, A_VAL.662 | N, A_ILE.666   | H, A_ILE.666    | 2.76 | 1.84 | 15.74 |
| 5T42-18.PDB | O, A_ILE.666 | N, A_ALA.670   | H, A_ALA.670    | 2.48 | 1.59 | 19.69 |
| 5T42-18.PDB | O, A_LEU.668 | N, A_ILE.671   | H, A_ILE.671    | 2.61 | 1.69 | 16.18 |
| 5T42-18.PDB | O, A_ILE.671 | N, A_VAL.675   | H, A_VAL.675    | 2.56 | 1.61 | 13.20 |
| 5T42-19.PDB | O, A_GLY.657 | N, A_VAL.662   | H, A_VAL.662    | 2.79 | 1.82 | 5.18  |
| 5T42-19.PDB | O, A_VAL.661 | N, A_VAL.665   | H, A_VAL.665    | 2.69 | 1.77 | 16.49 |
| 5T42-19.PDB | O, A_ILE.663 | N, A_ALA.667   | H, A_ALA.667    | 2.87 | 2.06 | 28.72 |
| 5T42-19.PDB | O, A_ILE.666 | N, A_ALA.670   | H, A_ALA.670    | 2.49 | 1.61 | 19.50 |
| 5T42-19.PDB | O, A_LEU.668 | N, A_ILE.671   | H, A_ILE.671    | 2.63 | 1.70 | 15.62 |
| 5T42-19.PDB | O, A_ILE.671 | N, A_VAL.675   | H, A_VAL.675    | 2.54 | 1.60 | 14.03 |

Table 92: 5T42-1-specific side chain and main chain hydrogen bonding analysis. In this table, a PDB file is specified with a four-letter PDB ID, except that the names of the PDB files corresponding to the single NMR structural model split from the NMR ensemble is specified with a four-letter PDB ID in addition to a hyphen followed by the single NMR structural model numeric ID, the residue naming scheme is **Chain ID\_residue name\_residue number**,  $\angle ADH$  represents the angle formed by acceptor (A), donor (D) and hydrogen (H) ( $\angle ADH$ ).

| PDB         | Acceptor (A) | Donor (D)    | Hydrogen (H) | D-A (Å) | H-A (Å) | $\angle ADH(^{\circ})$ |
|-------------|--------------|--------------|--------------|---------|---------|------------------------|
| 5T42-10.PDB | O, A.ASP.642 | N, A.TRP.645 | H, A.TRP.645 | 2.99    | 2.02    | 8.43                   |
| 5T42-10.PDB | O, A.GLY.647 | N, A.GLN.650 | H, A.GLN.650 | 2.93    | 2.13    | 29.57                  |
| 5T42-10.PDB | O, A.GLY.657 | N, A.VAL.661 | H, A.VAL.661 | 2.94    | 2.13    | 28.24                  |
| 5T42-10.PDB | O, A.VAL.661 | N, A.VAL.665 | H, A.VAL.665 | 2.69    | 1.77    | 16.79                  |
| 5T42-10.PDB | O, A.VAL.662 | N, A.ILE.666 | H, A.ILE.666 | 3.00    | 2.20    | 29.07                  |
| 5T42-10.PDB | O, A.ILE.663 | N, A.ALA.667 | H, A.ALA.667 | 2.81    | 2.01    | 29.53                  |
| 5T42-10.PDB | O, A.ILE.666 | N, A.ALA.670 | H, A.ALA.670 | 2.49    | 1.58    | 17.30                  |
| 5T42-10.PDB | O, A.LEU.668 | N, A.ILE.671 | H, A.ILE.671 | 2.61    | 1.69    | 15.97                  |
| 5T42-10.PDB | O, A.ILE.671 | N, A.VAL.675 | H, A.VAL.675 | 2.56    | 1.64    | 15.53                  |

Table 93: 5T42-10-specific side chain and main chain hydrogen bonding analysis. In this table, a PDB file is specified with a four-letter PDB ID, except that the names of the PDB files corresponding to the single NMR structural model split from the NMR ensemble is specified with a four-letter PDB ID in addition to a hyphen followed by the single NMR structural model numeric ID, the residue naming scheme is **Chain ID\_residue name\_residue number**,  $\angle ADH$  represents the angle formed by acceptor (A), donor (D) and hydrogen (H) ( $\angle ADH$ ).

| PDB         | Acceptor (A) | Donor (D)    | Hydrogen (H) | D-A (Å) | H-A (Å) | $\angle ADH(^{\circ})$ |
|-------------|--------------|--------------|--------------|---------|---------|------------------------|
| 5T42-11.PDB | O, A_GLY_657 | N, A_VAL_662 | H, A_VAL_662 | 2.81    | 1.85    | 11.13                  |
| 5T42-11.PDB | O, A_VAL_661 | N, A_VAL_665 | H, A_VAL_665 | 2.82    | 1.97    | 23.92                  |
| 5T42-11.PDB | O, A_VAL_662 | N, A_ILE_666 | H, A_ILE_666 | 2.70    | 1.78    | 16.16                  |
| 5T42-11.PDB | O, A_ILE_666 | N, A_ALA_670 | H, A_ALA_670 | 2.48    | 1.60    | 20.64                  |
| 5T42-11.PDB | O, A_LEU_668 | N, A_ILE_671 | H, A_ILE_671 | 2.64    | 1.75    | 19.83                  |
| 5T42-11.PDB | O, A_ILE_671 | N, A_VAL_675 | H, A_VAL_675 | 2.54    | 1.62    | 15.58                  |

Table 94: 5T42-11-specific side chain and main chain hydrogen bonding analysis. In this table, a PDB file is specified with a four-letter PDB ID, except that the names of the PDB files corresponding to the single NMR structural model split from the NMR ensemble is specified with a four-letter PDB ID in addition to a hyphen followed by the single NMR structural model numeric ID, the residue naming scheme is **Chain ID\_residue name\_residue number**,  $\angle ADH$  represents the angle formed by acceptor (A), donor (D) and hydrogen (H) ( $\angle ADH$ ).

| PDB         | Acceptor (A) | Donor (D)    | Hydrogen (H) | D-A (Å) | H-A (Å) | $\angle ADH(^{\circ})$ |
|-------------|--------------|--------------|--------------|---------|---------|------------------------|
| 5T42-12.PDB | O, A_ASP_642 | N, A_TRP_645 | H, A_TRP_645 | 2.97    | 2.01    | 7.30                   |
| 5T42-12.PDB | O, A_GLY_657 | N, A_VAL_662 | H, A_VAL_662 | 2.85    | 1.89    | 9.61                   |
| 5T42-12.PDB | O, A_VAL_661 | N, A_VAL_665 | H, A_VAL_665 | 2.71    | 1.80    | 16.55                  |
| 5T42-12.PDB | O, A_ILE_663 | N, A_ALA_667 | H, A_ALA_667 | 2.92    | 2.10    | 27.43                  |
| 5T42-12.PDB | O, A_ILE_666 | N, A_ALA_670 | H, A_ALA_670 | 2.49    | 1.61    | 19.85                  |
| 5T42-12.PDB | O, A_LEU_668 | N, A_ILE_671 | H, A_ILE_671 | 2.64    | 1.74    | 18.61                  |
| 5T42-12.PDB | O, A_ALA_672 | N, A_PHE_676 | H, A_PHE_676 | 2.50    | 1.65    | 23.17                  |

Table 95: 5T42-12-specific side chain and main chain hydrogen bonding analysis. In this table, a PDB file is specified with a four-letter PDB ID, except that the names of the PDB files corresponding to the single NMR structural model split from the NMR ensemble is specified with a four-letter PDB ID in addition to a hyphen followed by the single NMR structural model numeric ID, the residue naming scheme is **Chain ID\_residue name\_residue number**,  $\angle ADH$  represents the angle formed by acceptor (A), donor (D) and hydrogen (H) ( $\angle ADH$ ).

| PDB         | Acceptor (A) | Donor (D)    | Hydrogen (H) | D-A (Å) | H-A (Å) | $\angle ADH(^{\circ})$ |
|-------------|--------------|--------------|--------------|---------|---------|------------------------|
| 5T42-13.PDB | O, A_GLY_657 | N, A_VAL_662 | H, A_VAL_662 | 2.59    | 1.66    | 14.08                  |
| 5T42-13.PDB | O, A_VAL_661 | N, A_VAL_665 | H, A_VAL_665 | 2.67    | 1.78    | 19.44                  |
| 5T42-13.PDB | O, A_VAL_662 | N, A_ILE_666 | H, A_ILE_666 | 2.94    | 2.05    | 20.83                  |
| 5T42-13.PDB | O, A_ILE_666 | N, A_ALA_670 | H, A_ALA_670 | 2.45    | 1.56    | 19.27                  |
| 5T42-13.PDB | O, A_LEU_668 | N, A_ILE_671 | H, A_ILE_671 | 2.61    | 1.69    | 16.98                  |
| 5T42-13.PDB | O, A_ILE_671 | N, A_VAL_675 | H, A_VAL_675 | 2.57    | 1.62    | 12.60                  |

Table 96: 5T42-13-specific side chain and main chain hydrogen bonding analysis. In this table, a PDB file is specified with a four-letter PDB ID, except that the names of the PDB files corresponding to the single NMR structural model split from the NMR ensemble is specified with a four-letter PDB ID in addition to a hyphen followed by the single NMR structural model numeric ID, the residue naming scheme is **Chain ID\_residue name\_residue number**,  $\angle ADH$  represents the angle formed by acceptor (A), donor (D) and hydrogen (H) ( $\angle ADH$ ).

| PDB         | Acceptor (A) | Donor (D)    | Hydrogen (H) | D-A (Å) | H-A (Å) | $\angle ADH(^{\circ})$ |
|-------------|--------------|--------------|--------------|---------|---------|------------------------|
| 5T42-14.PDB | O, A.ASP_642 | N, A.TRP_645 | H, A.TRP_645 | 2.95    | 1.98    | 4.18                   |
| 5T42-14.PDB | O, A.GLY_657 | N, A.VAL_662 | H, A.VAL_662 | 2.91    | 1.94    | 7.26                   |
| 5T42-14.PDB | O, A.VAL_661 | N, A.VAL_665 | H, A.VAL_665 | 2.68    | 1.76    | 16.51                  |
| 5T42-14.PDB | O, A.ILE_663 | N, A.ALA_667 | H, A.ALA_667 | 2.87    | 2.08    | 29.84                  |
| 5T42-14.PDB | O, A.ILE_666 | N, A.ALA_670 | H, A.ALA_670 | 2.48    | 1.60    | 19.90                  |
| 5T42-14.PDB | O, A.LEU_668 | N, A.ILE_671 | H, A.ILE_671 | 2.65    | 1.74    | 18.08                  |
| 5T42-14.PDB | O, A.ILE_671 | N, A.VAL_675 | H, A.VAL_675 | 2.56    | 1.62    | 13.44                  |

Table 97: 5T42-14-specific side chain and main chain hydrogen bonding analysis. In this table, a PDB file is specified with a four-letter PDB ID, except that the names of the PDB files corresponding to the single NMR structural model split from the NMR ensemble is specified with a four-letter PDB ID in addition to a hyphen followed by the single NMR structural model numeric ID, the residue naming scheme is **Chain ID\_residue name\_residue number**,  $\angle ADH$  represents the angle formed by acceptor (A), donor (D) and hydrogen (H) ( $\angle ADH$ ).

| PDB         | Acceptor (A) | Donor (D)    | Hydrogen (H) | D-A (Å) | H-A (Å) | $\angle ADH(^{\circ})$ |
|-------------|--------------|--------------|--------------|---------|---------|------------------------|
| 5T42-15.PDB | O, A_GLY_657 | N, A_VAL_662 | H, A_VAL_662 | 2.70    | 1.74    | 9.57                   |
| 5T42-15.PDB | O, A_VAL_661 | N, A_VAL_665 | H, A_VAL_665 | 2.66    | 1.78    | 20.70                  |
| 5T42-15.PDB | O, A_VAL_662 | N, A_ILE_666 | H, A_ILE_666 | 2.88    | 2.00    | 21.01                  |
| 5T42-15.PDB | O, A_ILE_666 | N, A_ALA_670 | H, A_ALA_670 | 2.47    | 1.58    | 19.25                  |
| 5T42-15.PDB | O, A_LEU_668 | N, A_ILE_671 | H, A_ILE_671 | 2.62    | 1.73    | 20.10                  |
| 5T42-15.PDB | O, A_ILE_671 | N, A_VAL_675 | H, A_VAL_675 | 2.59    | 1.64    | 13.08                  |

Table 98: 5T42-15-specific side chain and main chain hydrogen bonding analysis. In this table, a PDB file is specified with a four-letter PDB ID, except that the names of the PDB files corresponding to the single NMR structural model split from the NMR ensemble is specified with a four-letter PDB ID in addition to a hyphen followed by the single NMR structural model numeric ID, the residue naming scheme is **Chain ID\_residue name\_residue number**,  $\angle ADH$  represents the angle formed by acceptor (A), donor (D) and hydrogen (H) ( $\angle ADH$ ).

| PDB         | Acceptor (A) | Donor (D)    | Hydrogen (H) | D-A (Å) | H-A (Å) | $\angle ADH(^{\circ})$ |
|-------------|--------------|--------------|--------------|---------|---------|------------------------|
| 5T42-16.PDB | O, A_GLY_657 | N, A_VAL_661 | H, A_VAL_661 | 2.96    | 2.14    | 27.44                  |
| 5T42-16.PDB | O, A_VAL_661 | N, A_VAL_665 | H, A_VAL_665 | 2.75    | 1.84    | 17.63                  |
| 5T42-16.PDB | O, A_VAL_662 | N, A_ILE_666 | H, A_ILE_666 | 2.97    | 2.15    | 27.18                  |
| 5T42-16.PDB | O, A_ILE_663 | N, A_ALA_667 | H, A_ALA_667 | 2.86    | 2.06    | 29.61                  |
| 5T42-16.PDB | O, A_ILE_666 | N, A_ALA_670 | H, A_ALA_670 | 2.49    | 1.61    | 20.21                  |
| 5T42-16.PDB | O, A_LEU_668 | N, A_ILE_671 | H, A_ILE_671 | 2.65    | 1.73    | 16.77                  |
| 5T42-16.PDB | O, A_ILE_671 | N, A_VAL_675 | H, A_VAL_675 | 2.52    | 1.56    | 10.87                  |

Table 99: 5T42-16-specific side chain and main chain hydrogen bonding analysis. In this table, a PDB file is specified with a four-letter PDB ID, except that the names of the PDB files corresponding to the single NMR structural model split from the NMR ensemble is specified with a four-letter PDB ID in addition to a hyphen followed by the single NMR structural model numeric ID, the residue naming scheme is **Chain ID\_residue name\_residue number**,  $\angle ADH$  represents the angle formed by acceptor (A), donor (D) and hydrogen (H) ( $\angle ADH$ ).

| PDB         | Acceptor (A) | Donor (D)    | Hydrogen (H) | D-A (Å) | H-A (Å) | $\angle ADH(^{\circ})$ |
|-------------|--------------|--------------|--------------|---------|---------|------------------------|
| 5T42-17.PDB | O, A.ASN.641 | N, A.TRP.644 | H, A.TRP.644 | 2.88    | 1.91    | 6.60                   |
| 5T42-17.PDB | O, A.GLY.647 | N, A.GLN.650 | H, A.GLN.650 | 2.78    | 1.97    | 27.65                  |
| 5T42-17.PDB | O, A.VAL.661 | N, A.VAL.665 | H, A.VAL.665 | 2.63    | 1.72    | 16.57                  |
| 5T42-17.PDB | O, A.ILE.663 | N, A.ALA.667 | H, A.ALA.667 | 2.81    | 2.02    | 29.77                  |
| 5T42-17.PDB | O, A.ILE.666 | N, A.ALA.670 | H, A.ALA.670 | 2.49    | 1.62    | 21.02                  |
| 5T42-17.PDB | O, A.LEU.668 | N, A.ILE.671 | H, A.ILE.671 | 2.63    | 1.72    | 18.50                  |
| 5T42-17.PDB | O, A.ALA.672 | N, A.PHE.676 | H, A.PHE.676 | 2.50    | 1.66    | 24.43                  |

Table 100: 5T42-17-specific side chain and main chain hydrogen bonding analysis. In this table, a PDB file is specified with a four-letter PDB ID, except that the names of the PDB files corresponding to the single NMR structural model split from the NMR ensemble is specified with a four-letter PDB ID in addition to a hyphen followed by the single NMR structural model numeric ID, the residue naming scheme is **Chain ID\_residue name\_residue number**,  $\angle ADH$  represents the angle formed by acceptor (A), donor (D) and hydrogen (H) ( $\angle ADH$ ).

| PDB         | Acceptor (A) | Donor (D)      | Hydrogen (H)    | D-A (Å) | H-A (Å) | $\angle ADH(^{\circ})$ |
|-------------|--------------|----------------|-----------------|---------|---------|------------------------|
| 5T42-18.PDB | O, A_TRP_644 | NH1, A_ARG_649 | HH11, A_ARG_649 | 2.95    | 2.14    | 29.60                  |
| 5T42-18.PDB | O, A_GLY_657 | N, A_VAL_662   | H, A_VAL_662    | 2.77    | 1.80    | 7.61                   |
| 5T42-18.PDB | O, A_VAL_661 | N, A_VAL_665   | H, A_VAL_665    | 2.78    | 1.94    | 24.62                  |
| 5T42-18.PDB | O, A_VAL_662 | N, A_ILE_666   | H, A_ILE_666    | 2.76    | 1.84    | 15.74                  |
| 5T42-18.PDB | O, A_ILE_666 | N, A_ALA_670   | H, A_ALA_670    | 2.48    | 1.59    | 19.69                  |
| 5T42-18.PDB | O, A_LEU_668 | N, A_ILE_671   | H, A_ILE_671    | 2.61    | 1.69    | 16.18                  |
| 5T42-18.PDB | O, A_ILE_671 | N, A_VAL_675   | H, A_VAL_675    | 2.56    | 1.61    | 13.20                  |

Table 101: 5T42-18-specific side chain and main chain hydrogen bonding analysis. In this table, a PDB file is specified with a four-letter PDB ID, except that the names of the PDB files corresponding to the single NMR structural model split from the NMR ensemble is specified with a four-letter PDB ID in addition to a hyphen followed by the single NMR structural model numeric ID, the residue naming scheme is **Chain ID\_residue name\_residue number**,  $\angle ADH$  represents the angle formed by acceptor (A), donor (D) and hydrogen (H) ( $\angle ADH$ ).

| PDB         | Acceptor (A) | Donor (D)    | Hydrogen (H) | D-A (Å) | H-A (Å) | $\angle ADH(^{\circ})$ |
|-------------|--------------|--------------|--------------|---------|---------|------------------------|
| 5T42-19.PDB | O, A_GLY_657 | N, A_VAL_662 | H, A_VAL_662 | 2.79    | 1.82    | 5.18                   |
| 5T42-19.PDB | O, A_VAL_661 | N, A_VAL_665 | H, A_VAL_665 | 2.69    | 1.77    | 16.49                  |
| 5T42-19.PDB | O, A_ILE_663 | N, A_ALA_667 | H, A_ALA_667 | 2.87    | 2.06    | 28.72                  |
| 5T42-19.PDB | O, A_ILE_666 | N, A_ALA_670 | H, A_ALA_670 | 2.49    | 1.61    | 19.50                  |
| 5T42-19.PDB | O, A_LEU_668 | N, A_ILE_671 | H, A_ILE_671 | 2.63    | 1.70    | 15.62                  |
| 5T42-19.PDB | O, A_ILE_671 | N, A_VAL_675 | H, A_VAL_675 | 2.54    | 1.60    | 14.03                  |

Table 102: 5T42-19-specific side chain and main chain hydrogen bonding analysis. In this table, a PDB file is specified with a four-letter PDB ID, except that the names of the PDB files corresponding to the single NMR structural model split from the NMR ensemble is specified with a four-letter PDB ID in addition to a hyphen followed by the single NMR structural model numeric ID, the residue naming scheme is **Chain ID\_residue name\_residue number**,  $\angle ADH$  represents the angle formed by acceptor (A), donor (D) and hydrogen (H) ( $\angle ADH$ ).

| PDB         | Acceptor (A) | Donor (D)    | Hydrogen (H) | D-A (Å) | H-A (Å) | $\angle ADH(^{\circ})$ |
|-------------|--------------|--------------|--------------|---------|---------|------------------------|
| 5T42-2.PDB  | O, A_GLY_647 | N, A_GLN_650 | H, A_GLN_650 | 2.85    | 1.99    | 23.63                  |
| 5T42-2.PDB  | O, A_GLN_650 | N, A_VAL_658 | H, A_VAL_658 | 2.89    | 2.05    | 24.99                  |
| 5T42-2.PDB  | O, A_GLY_657 | N, A_VAL_662 | H, A_VAL_662 | 2.80    | 1.82    | 2.37                   |
| 5T42-2.PDB  | O, A_VAL_661 | N, A_VAL_665 | H, A_VAL_665 | 2.67    | 1.75    | 16.21                  |
| 5T42-2.PDB  | O, A_ILE_663 | N, A_ALA_667 | H, A_ALA_667 | 2.88    | 2.06    | 27.64                  |
| 5T42-2.PDB  | O, A_ILE_666 | N, A_ALA_670 | H, A_ALA_670 | 2.48    | 1.59    | 19.13                  |
| 5T42-2.PDB  | O, A_LEU_668 | N, A_ILE_671 | H, A_ILE_671 | 2.64    | 1.72    | 16.09                  |
| 5T42-2.PDB  | O, A_ILE_671 | N, A_VAL_675 | H, A_VAL_675 | 2.56    | 1.62    | 13.86                  |
| 5T42-20.PDB | O, A_ASP_642 | N, A_TRP_645 | H, A_TRP_645 | 2.93    | 1.95    | 4.32                   |
| 5T42-20.PDB | O, A_GLY_647 | N, A_GLN_650 | H, A_GLN_650 | 2.94    | 2.14    | 29.59                  |
| 5T42-20.PDB | O, A_GLY_657 | N, A_VAL_662 | H, A_VAL_662 | 2.80    | 1.85    | 12.29                  |
| 5T42-20.PDB | O, A_VAL_661 | N, A_VAL_665 | H, A_VAL_665 | 2.73    | 1.85    | 21.16                  |
| 5T42-20.PDB | O, A_VAL_662 | N, A_ILE_666 | H, A_ILE_666 | 2.83    | 1.95    | 21.15                  |
| 5T42-20.PDB | O, A_ILE_666 | N, A_ALA_670 | H, A_ALA_670 | 2.47    | 1.58    | 18.76                  |
| 5T42-20.PDB | O, A_LEU_668 | N, A_ILE_671 | H, A_ILE_671 | 2.64    | 1.75    | 19.40                  |
| 5T42-20.PDB | O, A_ILE_671 | N, A_VAL_675 | H, A_VAL_675 | 2.55    | 1.62    | 15.71                  |

Table 103: 5T42-2-specific side chain and main chain hydrogen bonding analysis. In this table, a PDB file is specified with a four-letter PDB ID, except that the names of the PDB files corresponding to the single NMR structural model split from the NMR ensemble is specified with a four-letter PDB ID in addition to a hyphen followed by the single NMR structural model numeric ID, the residue naming scheme is **Chain ID\_residue name\_residue number**,  $\angle ADH$  represents the angle formed by acceptor (A), donor (D) and hydrogen (H) ( $\angle ADH$ ).

| PDB         | Acceptor (A) | Donor (D)    | Hydrogen (H) | D-A (Å) | H-A (Å) | $\angle ADH(^{\circ})$ |
|-------------|--------------|--------------|--------------|---------|---------|------------------------|
| 5T42-20.PDB | O, A.ASP.642 | N, A.TRP.645 | H, A.TRP.645 | 2.93    | 1.95    | 4.32                   |
| 5T42-20.PDB | O, A.GLY.647 | N, A.GLN.650 | H, A.GLN.650 | 2.94    | 2.14    | 29.59                  |
| 5T42-20.PDB | O, A.GLY.657 | N, A.VAL.662 | H, A.VAL.662 | 2.80    | 1.85    | 12.29                  |
| 5T42-20.PDB | O, A.VAL.661 | N, A.VAL.665 | H, A.VAL.665 | 2.73    | 1.85    | 21.16                  |
| 5T42-20.PDB | O, A.VAL.662 | N, A.ILE.666 | H, A.ILE.666 | 2.83    | 1.95    | 21.15                  |
| 5T42-20.PDB | O, A.ILE.666 | N, A.ALA.670 | H, A.ALA.670 | 2.47    | 1.58    | 18.76                  |
| 5T42-20.PDB | O, A.LEU.668 | N, A.ILE.671 | H, A.ILE.671 | 2.64    | 1.75    | 19.40                  |
| 5T42-20.PDB | O, A.ILE.671 | N, A.VAL.675 | H, A.VAL.675 | 2.55    | 1.62    | 15.71                  |

Table 104: 5T42-20-specific side chain and main chain hydrogen bonding analysis. In this table, a PDB file is specified with a four-letter PDB ID, except that the names of the PDB files corresponding to the single NMR structural model split from the NMR ensemble is specified with a four-letter PDB ID in addition to a hyphen followed by the single NMR structural model numeric ID, the residue naming scheme is **Chain ID\_residue name\_residue number**,  $\angle ADH$  represents the angle formed by acceptor (A), donor (D) and hydrogen (H) ( $\angle ADH$ ).

| PDB        | Acceptor (A) | Donor (D)    | Hydrogen (H) | D-A (Å) | H-A (Å) | $\angle ADH(^{\circ})$ |
|------------|--------------|--------------|--------------|---------|---------|------------------------|
| 5T42-3.PDB | O, A_GLY_655 | N, A_THR_659 | H, A_THR_659 | 2.55    | 1.77    | 29.97                  |
| 5T42-3.PDB | O, A_VAL_661 | N, A_VAL_665 | H, A_VAL_665 | 2.73    | 1.82    | 17.54                  |
| 5T42-3.PDB | O, A_VAL_662 | N, A_ILE_666 | H, A_ILE_666 | 2.99    | 2.18    | 28.74                  |
| 5T42-3.PDB | O, A_ILE_663 | N, A_ALA_667 | H, A_ALA_667 | 2.79    | 1.98    | 28.05                  |
| 5T42-3.PDB | O, A_ILE_666 | N, A_ALA_670 | H, A_ALA_670 | 2.48    | 1.60    | 19.71                  |
| 5T42-3.PDB | O, A_LEU_668 | N, A_ILE_671 | H, A_ILE_671 | 2.66    | 1.74    | 16.19                  |
| 5T42-3.PDB | O, A_ILE_671 | N, A_VAL_675 | H, A_VAL_675 | 2.56    | 1.62    | 14.42                  |

Table 105: 5T42-3-specific side chain and main chain hydrogen bonding analysis. In this table, a PDB file is specified with a four-letter PDB ID, except that the names of the PDB files corresponding to the single NMR structural model split from the NMR ensemble is specified with a four-letter PDB ID in addition to a hyphen followed by the single NMR structural model numeric ID, the residue naming scheme is **Chain ID\_residue name\_residue number**,  $\angle ADH$  represents the angle formed by acceptor (A), donor (D) and hydrogen (H) ( $\angle ADH$ ).

| PDB        | Acceptor (A) | Donor (D)    | Hydrogen (H) | D-A (Å) | H-A (Å) | $\angle ADH(^{\circ})$ |
|------------|--------------|--------------|--------------|---------|---------|------------------------|
| 5T42-4.PDB | O, A_GLY_647 | N, A_TRP_651 | H, A_TRP_651 | 2.59    | 1.68    | 16.69                  |
| 5T42-4.PDB | O, A_GLY_655 | N, A_THR_659 | H, A_THR_659 | 2.57    | 1.78    | 28.87                  |
| 5T42-4.PDB | O, A_VAL_661 | N, A_VAL_665 | H, A_VAL_665 | 2.61    | 1.73    | 20.44                  |
| 5T42-4.PDB | O, A_VAL_662 | N, A_ILE_666 | H, A_ILE_666 | 2.87    | 1.99    | 21.34                  |
| 5T42-4.PDB | O, A_ILE_666 | N, A_ALA_670 | H, A_ALA_670 | 2.47    | 1.57    | 17.87                  |
| 5T42-4.PDB | O, A_LEU_668 | N, A_ILE_671 | H, A_ILE_671 | 2.61    | 1.72    | 19.23                  |
| 5T42-4.PDB | O, A_ILE_671 | N, A_VAL_675 | H, A_VAL_675 | 2.57    | 1.63    | 13.71                  |

Table 106: 5T42-4-specific side chain and main chain hydrogen bonding analysis. In this table, a PDB file is specified with a four-letter PDB ID, except that the names of the PDB files corresponding to the single NMR structural model split from the NMR ensemble is specified with a four-letter PDB ID in addition to a hyphen followed by the single NMR structural model numeric ID, the residue naming scheme is **Chain ID\_residue name\_residue number**,  $\angle ADH$  represents the angle formed by acceptor (A), donor (D) and hydrogen (H) ( $\angle ADH$ ).

| PDB        | Acceptor (A) | Donor (D)    | Hydrogen (H) | D-A (Å) | H-A (Å) | $\angle ADH(^{\circ})$ |
|------------|--------------|--------------|--------------|---------|---------|------------------------|
| 5T42-5.PDB | O, A_GLY_647 | N, A_GLN_650 | H, A_GLN_650 | 2.85    | 1.98    | 22.54                  |
| 5T42-5.PDB | O, A_GLY_657 | N, A_VAL_662 | H, A_VAL_662 | 2.92    | 1.95    | 7.59                   |
| 5T42-5.PDB | O, A_VAL_661 | N, A_VAL_665 | H, A_VAL_665 | 2.70    | 1.79    | 17.07                  |
| 5T42-5.PDB | O, A_VAL_662 | N, A_ILE_666 | H, A_ILE_666 | 2.97    | 2.14    | 26.58                  |
| 5T42-5.PDB | O, A_ILE_663 | N, A_ALA_667 | H, A_ALA_667 | 2.96    | 2.16    | 29.30                  |
| 5T42-5.PDB | O, A_ILE_666 | N, A_ALA_670 | H, A_ALA_670 | 2.48    | 1.60    | 20.58                  |
| 5T42-5.PDB | O, A_LEU_668 | N, A_ILE_671 | H, A_ILE_671 | 2.66    | 1.76    | 19.47                  |
| 5T42-5.PDB | O, A_ILE_671 | N, A_VAL_675 | H, A_VAL_675 | 2.57    | 1.64    | 14.61                  |

Table 107: 5T42-5-specific side chain and main chain hydrogen bonding analysis. In this table, a PDB file is specified with a four-letter PDB ID, except that the names of the PDB files corresponding to the single NMR structural model split from the NMR ensemble is specified with a four-letter PDB ID in addition to a hyphen followed by the single NMR structural model numeric ID, the residue naming scheme is **Chain ID\_residue name\_residue number**,  $\angle ADH$  represents the angle formed by acceptor (A), donor (D) and hydrogen (H) ( $\angle ADH$ ).

| PDB        | Acceptor (A) | Donor (D)    | Hydrogen (H) | D-A (Å) | H-A (Å) | $\angle ADH(^{\circ})$ |
|------------|--------------|--------------|--------------|---------|---------|------------------------|
| 5T42-6.PDB | O, A_ASP_642 | N, A_THR_646 | H, A_THR_646 | 2.82    | 1.99    | 26.68                  |
| 5T42-6.PDB | O, A_GLY_657 | N, A_VAL_662 | H, A_VAL_662 | 2.76    | 1.79    | 8.30                   |
| 5T42-6.PDB | O, A_VAL_661 | N, A_VAL_665 | H, A_VAL_665 | 2.76    | 1.89    | 21.67                  |
| 5T42-6.PDB | O, A_VAL_662 | N, A_ILE_666 | H, A_ILE_666 | 2.85    | 1.95    | 19.14                  |
| 5T42-6.PDB | O, A_ILE_666 | N, A_ALA_670 | H, A_ALA_670 | 2.48    | 1.61    | 21.67                  |
| 5T42-6.PDB | O, A_LEU_668 | N, A_ILE_671 | H, A_ILE_671 | 2.64    | 1.75    | 19.95                  |
| 5T42-6.PDB | O, A_ILE_671 | N, A_VAL_675 | H, A_VAL_675 | 2.63    | 1.70    | 15.13                  |

Table 108: 5T42-6-specific side chain and main chain hydrogen bonding analysis. In this table, a PDB file is specified with a four-letter PDB ID, except that the names of the PDB files corresponding to the single NMR structural model split from the NMR ensemble is specified with a four-letter PDB ID in addition to a hyphen followed by the single NMR structural model numeric ID, the residue naming scheme is **Chain ID\_residue name\_residue number**,  $\angle ADH$  represents the angle formed by acceptor (A), donor (D) and hydrogen (H) ( $\angle ADH$ ).

| PDB        | Acceptor (A) | Donor (D)    | Hydrogen (H) | D-A (Å) | H-A (Å) | $\angle ADH(^{\circ})$ |
|------------|--------------|--------------|--------------|---------|---------|------------------------|
| 5T42-7.PDB | O, A_GLY_647 | N, A_GLN_650 | H, A_GLN_650 | 2.74    | 1.91    | 26.39                  |
| 5T42-7.PDB | O, A_GLY_655 | N, A_THR_659 | H, A_THR_659 | 2.58    | 1.78    | 28.20                  |
| 5T42-7.PDB | O, A_VAL_661 | N, A_VAL_665 | H, A_VAL_665 | 2.65    | 1.77    | 20.26                  |
| 5T42-7.PDB | O, A_VAL_662 | N, A_ILE_666 | H, A_ILE_666 | 2.84    | 1.96    | 20.50                  |
| 5T42-7.PDB | O, A_ILE_666 | N, A_ALA_670 | H, A_ALA_670 | 2.48    | 1.58    | 18.36                  |
| 5T42-7.PDB | O, A_LEU_668 | N, A_ILE_671 | H, A_ILE_671 | 2.60    | 1.68    | 15.41                  |
| 5T42-7.PDB | O, A_ILE_671 | N, A_VAL_675 | H, A_VAL_675 | 2.56    | 1.63    | 14.62                  |

Table 109: 5T42-7-specific side chain and main chain hydrogen bonding analysis. In this table, a PDB file is specified with a four-letter PDB ID, except that the names of the PDB files corresponding to the single NMR structural model split from the NMR ensemble is specified with a four-letter PDB ID in addition to a hyphen followed by the single NMR structural model numeric ID, the residue naming scheme is **Chain ID\_residue name\_residue number**,  $\angle ADH$  represents the angle formed by acceptor (A), donor (D) and hydrogen (H) ( $\angle ADH$ ).

| PDB        | Acceptor (A) | Donor (D)    | Hydrogen (H) | D-A (Å) | H-A (Å) | $\angle ADH(^{\circ})$ |
|------------|--------------|--------------|--------------|---------|---------|------------------------|
| 5T42-8.PDB | O, A_GLY_647 | N, A_GLN_650 | H, A_GLN_650 | 2.71    | 1.91    | 28.69                  |
| 5T42-8.PDB | O, A_VAL_661 | N, A_VAL_665 | H, A_VAL_665 | 2.71    | 1.80    | 17.39                  |
| 5T42-8.PDB | O, A_VAL_662 | N, A_ILE_666 | H, A_ILE_666 | 2.97    | 2.15    | 26.89                  |
| 5T42-8.PDB | O, A_ILE_663 | N, A_ALA_667 | H, A_ALA_667 | 2.86    | 2.06    | 28.83                  |
| 5T42-8.PDB | O, A_ILE_666 | N, A_ALA_670 | H, A_ALA_670 | 2.49    | 1.58    | 18.05                  |
| 5T42-8.PDB | O, A_LEU_668 | N, A_ILE_671 | H, A_ILE_671 | 2.64    | 1.73    | 17.27                  |
| 5T42-8.PDB | O, A_ILE_671 | N, A_VAL_675 | H, A_VAL_675 | 2.59    | 1.65    | 13.58                  |

Table 110: 5T42-8-specific side chain and main chain hydrogen bonding analysis. In this table, a PDB file is specified with a four-letter PDB ID, except that the names of the PDB files corresponding to the single NMR structural model split from the NMR ensemble is specified with a four-letter PDB ID in addition to a hyphen followed by the single NMR structural model numeric ID, the residue naming scheme is **Chain ID\_residue name\_residue number**,  $\angle ADH$  represents the angle formed by acceptor (A), donor (D) and hydrogen (H) ( $\angle ADH$ ).

| PDB        | Acceptor (A)   | Donor (D)     | Hydrogen (H)   | D-A (Å) | H-A (Å) | $\angle ADH(^{\circ})$ |
|------------|----------------|---------------|----------------|---------|---------|------------------------|
| 5T42-9.PDB | OG1, A_THR_634 | NZ, A_LYS_633 | HZ2, A_LYS_633 | 2.68    | 1.67    | 11.19                  |
| 5T42-9.PDB | O, A_VAL_661   | N, A_VAL_665  | H, A_VAL_665   | 2.72    | 1.81    | 17.22                  |
| 5T42-9.PDB | O, A_VAL_662   | N, A_ILE_666  | H, A_ILE_666   | 2.97    | 2.16    | 28.57                  |
| 5T42-9.PDB | O, A_ILE_663   | N, A_ALA_667  | H, A_ALA_667   | 2.80    | 2.00    | 29.42                  |
| 5T42-9.PDB | O, A_ILE_666   | N, A_ALA_670  | H, A_ALA_670   | 2.48    | 1.60    | 19.55                  |
| 5T42-9.PDB | O, A_LEU_668   | N, A_ILE_671  | H, A_ILE_671   | 2.64    | 1.73    | 16.82                  |
| 5T42-9.PDB | O, A_ILE_671   | N, A_VAL_675  | H, A_VAL_675   | 2.56    | 1.62    | 13.44                  |

Table 111: 5T42-9-specific side chain and main chain hydrogen bonding analysis. In this table, a PDB file is specified with a four-letter PDB ID, except that the names of the PDB files corresponding to the single NMR structural model split from the NMR ensemble is specified with a four-letter PDB ID in addition to a hyphen followed by the single NMR structural model numeric ID, the residue naming scheme is **Chain ID\_residue name\_residue number**,  $\angle ADH$  represents the angle formed by acceptor (A), donor (D) and hydrogen (H) ( $\angle ADH$ ).

| PDB      | Acceptor (A)  | Donor (D)    | Hydrogen (H) | D-A (Å) | H-A (Å) | $\angle ADH(^{\circ})$ |
|----------|---------------|--------------|--------------|---------|---------|------------------------|
| 5HJ3.PDB | OE1, J_GLN_89 | OH, J_TYR_36 | HH, J_TYR_36 | 2.57    | 1.82    | 22.55                  |

Table 112: 5HJ3-specific side chain hydrogen bonding analysis. In this table, a PDB file is specified with a four-letter PDB ID, except that the names of the PDB files corresponding to the single NMR structural model split from the NMR ensemble is specified with a four-letter PDB ID in addition to a hyphen followed by the single NMR structural model numeric ID, the residue naming scheme is **Chain ID\_residue name\_residue number**,  $\angle ADH$  represents the angle formed by acceptor (A), donor (D) and hydrogen (H) ( $\angle ADH$ ).

| PDB        | Acceptor (A)   | Donor (D)     | Hydrogen (H)   | D-A (Å) | H-A (Å) | $\angle ADH(^{\circ})$ |
|------------|----------------|---------------|----------------|---------|---------|------------------------|
| 5T42-9.PDB | OG1, A_THR_634 | NZ, A_LYS_633 | HZ2, A_LYS_633 | 2.68    | 1.67    | 11.19                  |

Table 113: 5T42-9-specific side chain hydrogen bonding analysis. In this table, a PDB file is specified with a four-letter PDB ID, except that the names of the PDB files corresponding to the single NMR structural model split from the NMR ensemble is specified with a four-letter PDB ID in addition to a hyphen followed by the single NMR structural model numeric ID, the residue naming scheme is **Chain ID\_residue name\_residue number**,  $\angle ADH$  represents the angle formed by acceptor (A), donor (D) and hydrogen (H) ( $\angle ADH$ ).
